# Supplementary material for: Quantitative insights into the cyanobacterial cell economy
Source: eLife. 2019 Feb 4;8:e42508. doi: 10.7554/eLife.42508 (PMC6391073; doi:10.7554/eLife.42508)
Supplement: Figure 3—source data 1. [file elife-42508-fig3-data1.xlsx]

## Sheet: mat114
Protein identification																			statistical analysis														fmol / µg total protein
Protein names	Gene names	Majority protein IDs	Entry name	C: Gene ontology (biological process)	C: Gene ontology (cellular component)	C: Gene ontology (molecular function)	C: Gene ontology (GO)	Length	Peptides	Razor + unique peptides	Unique peptides	Sequence coverage [%]	Mol. weight [kDa]	Q-value	Score	Intensity	MS/MS count	Number of proteins	Student's T-test Difference 0055_0027.5	-Log Student's T-test p-value 0110_0027.5	Student's T-test q-value 0110_0027.5	Student's T-test Difference 0110_0027.5	-Log Student's T-test p-value 0220_0027.5	Student's T-test q-value 0220_0027.5	Student's T-test Difference 0220_0027.5	-Log Student's T-test p-value 0440_0027.5	Student's T-test q-value 0440_0027.5	Student's T-test Difference 0440_0027.5	-Log Student's T-test p-value 1100_0027.5	Student's T-test q-value 1100_0027.5	Student's T-test Difference 1100_0027.5	C: Student's T-test Significant 1100_0027.5	0027.5_1	0027.5_2	0027.5_3	0027.5_4	0027.5_5	0055_1	0055_2	0055_3	0055_4	0055_5	0110_1	0110_2	0110_3	0110_4	0110_5	0220_1	0220_2
Photosystem II CP47 reaction center protein (PSII 47 kDa protein) (Protein CP-47)	psbB slr0906	P05429	PSBB_SYNY3	photosynthetic electron transport in photosystem II [GO:0009772];protein-chromophore linkage [GO:0018298]	integral component of membrane [GO:0016021];plasma membrane-derived thylakoid photosystem II [GO:0030096];thylakoid membrane [GO:0042651]	chlorophyll binding [GO:0016168];electron transporter, transferring electrons within the cyclic electron transport pathway of photosynthesis activity [GO:0045156]	chlorophyll binding [GO:0016168];electron transporter, transferring electrons within the cyclic electron transport pathway of photosynthesis activity [GO:0045156];integral component of membrane [GO:0016021];photosynthetic electron transport in photosystem II [GO:0009772];plasma membrane-derived thylakoid photosystem II [GO:0030096];protein-chromophore linkage [GO:0018298];thylakoid membrane [GO:0…	507	29	29	29	46.5	55.902	0	323.31	104880000000	1058	1	-0.182573	1.54924	0.256821	-0.420844	0.438083	0.724702	-0.116435	1.55568	0.299683	-0.366013	3.22966	0.0256216	-0.933634	+	64.795	75.2247	66.86	78.8276	62.9584	67.131	69.4327	69.1326	64.6058	41.2628	61.3964	62.6689	53.1527	51.1984	35.9244	62.0826	57.7718
Cytochrome b559 subunit alpha (PSII reaction center subunit V)	psbE ssr3451	P09190	PSBE_SYNY3	photosynthetic electron transport chain [GO:0009767]	integral component of membrane [GO:0016021];photosystem II reaction center [GO:0009539];plasma membrane-derived thylakoid photosystem II [GO:0030096];thylakoid membrane [GO:0042651]	heme binding [GO:0020037];metal ion binding [GO:0046872]	heme binding [GO:0020037];integral component of membrane [GO:0016021];metal ion binding [GO:0046872];photosynthetic electron transport chain [GO:0009767];photosystem II reaction center [GO:0009539];plasma membrane-derived thylakoid photosystem II [GO:0030096];thylakoid membrane [GO:0042651]	81	5	5	5	58	9.4485	0	180.14	14311000000	107	1	-0.327753	1.345	0.253788	-0.638244	1.43247	0.388557	-0.423254	2.1167	0.255125	-0.621133	3.46681	0.021625	-0.948134	+	31.8718	33.7481	33.0224	28.1474	23.875	33.9046	25.9658	23.9739	24.9712	14.5442	27.4167	25.8157	21.3028	16.5255	10.4882	24.868	23.2651
Photosystem II D2 protein (PSII D2 protein) (EC 1.10.3.9) (Photosystem Q(A) protein)	psbD sll0849	P09192	PSBD_SYNY3	photosynthetic electron transport in photosystem II [GO:0009772];protein-chromophore linkage [GO:0018298]	integral component of membrane [GO:0016021];plasma membrane-derived thylakoid photosystem II [GO:0030096];thylakoid membrane [GO:0042651]	chlorophyll binding [GO:0016168];electron transporter, transferring electrons within the cyclic electron transport pathway of photosynthesis activity [GO:0045156];metal ion binding [GO:0046872]	chlorophyll binding [GO:0016168];electron transporter, transferring electrons within the cyclic electron transport pathway of photosynthesis activity [GO:0045156];integral component of membrane [GO:0016021];metal ion binding [GO:0046872];photosynthetic electron transport in photosystem II [GO:0009772];plasma membrane-derived thylakoid photosystem II [GO:0030096];protein-chromophore linkage [GO:00…	352	11	11	11	31	39.492	0	323.31	47451000000	351	1	-0.119393	1.02899	0.279647	-0.735044	0.623011	0.527461	-0.375875	1.16281	0.298932	-0.601093	2.3369	0.0256296	-1.38683	+	64.0892	65.3327	50.0664	44.6482	31.9164	65.4403	52.7552	45.845	46.456	26.8616	52.2653	44.954	28.0897	25.3309	13.9878	38.5302	28.6228
Photosystem II CP43 reaction center protein (PSII 43 kDa protein) (Protein CP-43)	psbC sll0851	P09193	PSBC_SYNY3	photosynthetic electron transport in photosystem II [GO:0009772];protein-chromophore linkage [GO:0018298]	integral component of membrane [GO:0016021];plasma membrane-derived thylakoid photosystem II [GO:0030096];thylakoid membrane [GO:0042651]	chlorophyll binding [GO:0016168];electron transporter, transferring electrons within the cyclic electron transport pathway of photosynthesis activity [GO:0045156];metal ion binding [GO:0046872]	chlorophyll binding [GO:0016168];electron transporter, transferring electrons within the cyclic electron transport pathway of photosynthesis activity [GO:0045156];integral component of membrane [GO:0016021];metal ion binding [GO:0046872];photosynthetic electron transport in photosystem II [GO:0009772];plasma membrane-derived thylakoid photosystem II [GO:0030096];protein-chromophore linkage [GO:00…	460	27	27	27	42.8	50.302	0	323.31	87597000000	764	1	-0.239853	1.23196	0.257664	-0.629404	0.946471	0.451993	-0.314535	1.56054	0.26	-0.474893	2.59061	0.0267797	-1.23955	+	68.2998	61.6887	61.0649	64.2725	47.0175	64.4365	50.2184	58.953	57.5041	30.8665	52.7494	47.4514	49.8759	36.7692	19.1211	45.5765	45.12
S-methyl-5'-thioadenosine phosphorylase (EC 2.4.2.28) (5'-methylthioadenosine phosphorylase) (MTA phosphorylase) (MTAP)	mtnP sll0135	P0DJF8	MTAP_SYNY3	L-methionine salvage from methylthioadenosine [GO:0019509];purine ribonucleoside salvage [GO:0006166]		S-methyl-5-thioadenosine phosphorylase activity [GO:0017061]	L-methionine salvage from methylthioadenosine [GO:0019509];purine ribonucleoside salvage [GO:0006166];S-methyl-5-thioadenosine phosphorylase activity [GO:0017061]	326	8	8	8	45.1	35.318	0	306.37	2768300000	186	1	0.137047	0.748918	0.473734	0.248476	1.12571	0.419365	0.332745	0.673686	0.532698	0.239107	0.156459	0.824382	0.0714458		1.11058	1.54032	0.888517	1.28693	1.45299	1.37326	1.60108	1.43425	1.06127	1.36554	1.43662	1.61438	1.23514	1.74174	1.34769	1.54105	1.79937
Photosystem II manganese-stabilizing polypeptide (MSP)	psbO sll0427	P10549	PSBO_SYNY3	photosynthesis [GO:0015979];photosystem II stabilization [GO:0042549]	extrinsic component of membrane [GO:0019898];integral component of membrane [GO:0016021];photosystem II oxygen evolving complex [GO:0009654];plasma membrane-derived thylakoid photosystem II [GO:0030096]	calcium ion binding [GO:0005509]	calcium ion binding [GO:0005509];extrinsic component of membrane [GO:0019898];integral component of membrane [GO:0016021];photosynthesis [GO:0015979];photosystem II oxygen evolving complex [GO:0009654];photosystem II stabilization [GO:0042549];plasma membrane-derived thylakoid photosystem II [GO:0030096]	274	23	23	23	80.3	29.911	0	323.31	83443000000	744	1	-0.112773	1.28503	0.284693	-0.409744	0.986949	0.459534	-0.285075	2.23209	0.25786	-0.437013	2.79319	0.0246186	-0.821174	+	85.5508	80.635	80.6427	70.8172	78.5983	89.3631	73.3204	71.0466	96.7099	46.5294	78.5143	67.6482	61.8059	59.6366	38.2289	75.5059	48.1844
Photosystem I reaction center subunit IV (Photosystem I 8.1 kDa protein) (p30 protein)	psaE ssr2831	P12975	PSAE_SYNY3	photosynthesis [GO:0015979]	photosystem I reaction center [GO:0009538];thylakoid membrane [GO:0042651]		photosynthesis [GO:0015979];photosystem I reaction center [GO:0009538];thylakoid membrane [GO:0042651]	74	7	7	7	86.5	8.145	0	323.31	28155000000	262	1	-0.297873	1.02217	0.297691	-0.581844	0.862068	0.450812	-0.363855	1.83055	0.257881	-0.523473	3.15781	0.0241429	-1.19727	+	175.364	148.44	173.486	118.984	125.316	162.321	133.44	120.183	144.336	63.8304	139.816	130.842	126.946	76.5392	50.4294	123.693	93.1377
Photosystem II reaction center protein H (PSII-H)	psbH ssl2598	P14835	PSBH_SYNY3	photosynthesis [GO:0015979];protein stabilization [GO:0050821]	integral component of membrane [GO:0016021];plasma membrane-derived thylakoid photosystem II [GO:0030096];thylakoid membrane [GO:0042651]	phosphate ion binding [GO:0042301]	integral component of membrane [GO:0016021];phosphate ion binding [GO:0042301];photosynthesis [GO:0015979];plasma membrane-derived thylakoid photosystem II [GO:0030096];protein stabilization [GO:0050821];thylakoid membrane [GO:0042651]	64	2	2	2	25	7.1164	0	100.14	15443000000	89	1	-0.154393	0.995514	0.307462	-0.541344	0.368869	0.709887	-0.161575	1.65277	0.253516	-0.557033	3.24648	0.0215758	-1.06675	+	166.977	205.819	138.282	122.372	125.594	158.167	166.392	149.675	112.516	96.5076	142.23	148.249	110.314	84.2104	57.1188	152.982	137.462
Glucose transport protein	gtr glcP sll0771	P15729	GLCP_SYNY3		integral component of membrane [GO:0016021];plasma membrane [GO:0005886]	sugar:proton symporter activity [GO:0005351]	integral component of membrane [GO:0016021];plasma membrane [GO:0005886];sugar:proton symporter activity [GO:0005351]	468	2	2	2	3	49.747	0	4.3167	422170000	20	1	-1.27761	0.851659	0.333323	-0.599664	0.646041	0.503621	-0.440595	0.791206	0.388877	-0.542813	1.31356	0.0673177	-1.90163		0.676241	0.333818	0.477665	0.5661	0.249226	0.401148	0.364842	0.374722	0.287153	0.0115343	0.383815	0.355317	0.39351	0.222461	0.159474	0.306427	0.302644
Photosystem II protein D1 2 (PSII D1 protein 2) (EC 1.10.3.9) (Photosystem II Q(B) protein 2)	psbA2 psbA-2 slr1311;psbA3 psbA-3 sll1867	P16033	PSBA2_SYNY3	photosynthetic electron transport in photosystem II [GO:0009772];protein-chromophore linkage [GO:0018298];response to herbicide [GO:0009635]	integral component of membrane [GO:0016021];plasma membrane-derived thylakoid photosystem II [GO:0030096];thylakoid membrane [GO:0042651]	chlorophyll binding [GO:0016168];electron transporter, transferring electrons within the cyclic electron transport pathway of photosynthesis activity [GO:0045156];metal ion binding [GO:0046872]	chlorophyll binding [GO:0016168];electron transporter, transferring electrons within the cyclic electron transport pathway of photosynthesis activity [GO:0045156];integral component of membrane [GO:0016021];metal ion binding [GO:0046872];photosynthetic electron transport in photosystem II [GO:0009772];plasma membrane-derived thylakoid photosystem II [GO:0030096];protein-chromophore linkage [GO:00…	360	9	9	9	27.5	39.721	0	323.31	55151000000	310	2	0.0465671	0.437261	0.597409	-0.266664	0.026546	0.970126	-0.0230745	0.108497	0.894694	-0.067673	1.30051	0.106944	-0.687814		58.0052	66.6824	31.9174	42.7404	62.0142	64.9747	52.029	61.7212	62.5437	29.4658	49.7727	46.0037	53.9695	41.8694	25.0979	48.6618	30.9077
ATP synthase gamma chain (ATP synthase F1 sector gamma subunit) (F-ATPase gamma subunit)	atpG atpC sll1327	P17253	ATPG_SYNY3	ATP synthesis coupled proton transport [GO:0015986]	plasma membrane proton-transporting ATP synthase complex [GO:0045260];proton-transporting ATP synthase complex, catalytic core F(1) [GO:0045261];thylakoid membrane [GO:0042651]	proton-transporting ATP synthase activity, rotational mechanism [GO:0046933]	ATP synthesis coupled proton transport [GO:0015986];plasma membrane proton-transporting ATP synthase complex [GO:0045260];proton-transporting ATP synthase activity, rotational mechanism [GO:0046933];proton-transporting ATP synthase complex, catalytic core F(1) [GO:0045261];thylakoid membrane [GO:0042651]	314	21	21	21	73.9	34.605	0	323.31	37174000000	503	1	0.0891669	1.59709	0.277486	0.332276	1.06502	0.439044	0.315865	1.05639	0.366383	0.370847	0.661636	0.422736	0.251546		21.9677	20.254	15.715	18.7021	23.4713	22.6181	18.0352	18.4903	17.753	31.2216	26.3017	21.4362	24.6219	28.5047	24.5354	28.661	29.0264
NAD(P)H-quinone oxidoreductase subunit K 1 (EC 1.6.5.-) (NAD(P)H dehydrogenase I subunit K 1) (NDH-1 subunit K 1) (NDH-K 1)	ndhK1 psbG slr1280	P19050	NDHK1_SYNY3		thylakoid membrane [GO:0042651]	4 iron, 4 sulfur cluster binding [GO:0051539];metal ion binding [GO:0046872];NADH dehydrogenase (ubiquinone) activity [GO:0008137];quinone binding [GO:0048038]	4 iron, 4 sulfur cluster binding [GO:0051539];metal ion binding [GO:0046872];NADH dehydrogenase (ubiquinone) activity [GO:0008137];quinone binding [GO:0048038];thylakoid membrane [GO:0042651]	248	17	17	17	73.4	27.345	0	241.59	10364000000	340	1	-0.065553	0.456034	0.610271	-0.225804	0.756697	0.513241	-0.295855	0.104167	0.909245	0.0499869	0.236744	0.747572	0.110966		4.21756	3.34043	6.38095	5.56595	5.15519	4.01335	3.3749	4.34993	6.48583	5.37838	3.70092	2.90569	5.07522	4.07338	5.30515	4.24633	2.93588
NAD(P)H-quinone oxidoreductase subunit J (EC 1.6.5.-) (NAD(P)H dehydrogenase subunit J) (NADH-plastoquinone oxidoreductase subunit J) (NDH-1 subunit J) (NDH-J) (ORF 155)	ndhJ slr1281	P19125	NDHJ_SYNY3	cellular respiration [GO:0045333]	thylakoid membrane [GO:0042651]	NADH dehydrogenase (ubiquinone) activity [GO:0008137];quinone binding [GO:0048038]	cellular respiration [GO:0045333];NADH dehydrogenase (ubiquinone) activity [GO:0008137];quinone binding [GO:0048038];thylakoid membrane [GO:0042651]	179	7	7	7	36.3	20.593	0	127.56	2339100000	87	1	-0.173973	0.554026	0.616833	-0.161784	0.388619	0.79995	-0.0728146	0.245641	0.805086	-0.0983731	0.397296	0.638552	0.132906		2.47102	3.00702	2.53498	3.22149	3.01786	2.01546	2.38592	3.33895	2.73263	2.28385	1.97067	2.29816	2.64226	3.169	2.75641	2.63576	2.76445
Photosystem I reaction center subunit II (Photosystem I 16 kDa polypeptide) (PSI-D)	psaD slr0737	P19569	PSAD_SYNY3	photosynthesis [GO:0015979]	photosystem I reaction center [GO:0009538];plasma membrane-derived photosystem I [GO:0030094]		photosynthesis [GO:0015979];photosystem I reaction center [GO:0009538];plasma membrane-derived photosystem I [GO:0030094]	141	15	15	15	90.1	15.644	0	323.31	185750000000	455	1	-0.293753	1.28467	0.252917	-0.712244	1.05859	0.408814	-0.488535	0.879085	0.376899	-0.476693	1.63271	0.0570606	-0.988094		436.28	278.751	592.172	413.955	287.741	314.498	290.087	301.893	548.479	205.155	275.171	265.649	370.28	186.732	143.777	241.189	229.189
Drug sensory protein A (EC 2.7.13.3)	dspA dfr sll0698	P20169	DSPA_SYNY3	regulation of transcription, DNA-templated [GO:0006355];response to herbicide [GO:0009635]	integral component of membrane [GO:0016021];intracellular [GO:0005622];plasma membrane [GO:0005886]	ATP binding [GO:0005524];phosphorelay sensor kinase activity [GO:0000155]	ATP binding [GO:0005524];integral component of membrane [GO:0016021];intracellular [GO:0005622];phosphorelay sensor kinase activity [GO:0000155];plasma membrane [GO:0005886];regulation of transcription, DNA-templated [GO:0006355];response to herbicide [GO:0009635]	663	10	10	10	23.7	74.535	0	81.403	770070000	136	1	0.412207	0.453624	0.571567	0.310616	0.363688	0.672119	0.282485	0.161655	0.826734	0.138967	0.335408	0.569626	-0.331474		0.0928541	0.203096	0.0823591	0.191727	0.178813	0.193366	0.196261	0.278296	0.152385	0.13806	0.193658	0.191774	0.154789	0.219004	0.12411	0.22126	0.138034
Anthranilate synthase component 1 (AS) (ASI) (EC 4.1.3.27)	trpE slr0738	P20170	TRPE_SYNY3	tryptophan biosynthetic process [GO:0000162]	anthranilate synthase complex [GO:0005950]	anthranilate synthase activity [GO:0004049];metal ion binding [GO:0046872]	anthranilate synthase activity [GO:0004049];anthranilate synthase complex [GO:0005950];metal ion binding [GO:0046872];tryptophan biosynthetic process [GO:0000162]	508	17	17	17	33.3	57.146	0	127.62	2395100000	194	1	-0.096153	0.224358	0.799876	-0.102304	0.769174	0.526006	-0.261735	0.438168	0.647808	-0.200713	1.86894	0.0586468	-0.684974		0.918155	0.833431	0.810999	0.769359	0.530574	0.804468	0.890966	0.772653	0.688292	0.476243	0.879578	0.692929	0.702257	0.794614	0.522496	0.600367	0.61895
Delta(12)-fatty-acid desaturase (EC 1.14.19.6)	desA slr1350	P20388	DESA_SYNY3	unsaturated fatty acid biosynthetic process [GO:0006636]	integral component of membrane [GO:0016021];plasma membrane [GO:0005886]	Delta12-fatty-acid desaturase activity [GO:0102985]	Delta12-fatty-acid desaturase activity [GO:0102985];integral component of membrane [GO:0016021];plasma membrane [GO:0005886];unsaturated fatty acid biosynthetic process [GO:0006636]	351	3	3	3	12.3	40.495	0	20.828	282600000	37	1	0.511909	1.62602	0.209633	1.9116	1.34993	0.410815	2.02336	1.30772	0.25668	1.90805	0.921497	0.139453	1.52007				0.0200921	0.0237526	0.200702	0.125035	0.0420207		0.0394725	0.18754	0.0847926	0.0976849	0.183375	0.306344	0.187335	0.262051	0.207502
Acyl carrier protein (ACP)	acpP acp ssl2084	P20804	ACP_SYNY3	lipid A biosynthetic process [GO:0009245]	cytosol [GO:0005829]	acyl binding [GO:0000035];acyl carrier activity [GO:0000036];phosphopantetheine binding [GO:0031177]	acyl binding [GO:0000035];acyl carrier activity [GO:0000036];cytosol [GO:0005829];lipid A biosynthetic process [GO:0009245];phosphopantetheine binding [GO:0031177]	77	2	2	2	26	8.5895	0	54.235	775040000	15	1	-0.462973	1.66603	0.212885	-0.702704	1.45083	0.406635	-0.621655	2.3187	0.269739	-0.613853	2.14069	0.0413465	-0.749914	+	3.35313	2.52596	3.69167	2.36121	2.25156	2.7986	1.66895	1.62112	3.25801	1.35432	2.2145	1.51801	2.34465	1.70566	1.08274	1.87633	1.22909
Plastocyanin	petE sll0199	P21697	PLAS_SYNY3		thylakoid membrane [GO:0042651]	copper ion binding [GO:0005507];electron transfer activity [GO:0009055]	copper ion binding [GO:0005507];electron transfer activity [GO:0009055];thylakoid membrane [GO:0042651]	126	4	4	4	57.1	13.146	0	323.31	9799400000	148	1	-1.04715	0.0623942	0.930327	0.0734363	0.0956242	0.889568	-0.181635	0.159421	0.809777	-0.314933	0.000645029	0.998192	0.00110574		22.4013	19.0436	26.4038	10.4659	5.52329	6.33308	23.8372	2.57915	20.8286	2.13076	18.4223	14.8509	13.8065	14.3008	15.5473	24.5341	16.8584
60 kDa chaperonin 2 (GroEL protein 2) (Protein Cpn60 2)	groL2 cpn60-2 groEL-2 groEL2 sll0416	P22034	CH602_SYNY3	chaperone-mediated protein folding [GO:0061077];'de novo' protein folding [GO:0006458];protein refolding [GO:0042026]	GroEL-GroES complex [GO:1990220]	ATP binding [GO:0005524];protein binding involved in protein folding [GO:0044183];unfolded protein binding [GO:0051082]	ATP binding [GO:0005524];chaperone-mediated protein folding [GO:0061077];'de novo' protein folding [GO:0006458];GroEL-GroES complex [GO:1990220];protein binding involved in protein folding [GO:0044183];protein refolding [GO:0042026];unfolded protein binding [GO:0051082]	552	64	63	63	75.4	57.774	0	323.31	180800000000	2049	1	0.236907	1.33014	0.285244	0.403996	0.667017	0.531066	0.312645	1.44743	0.259966	0.528107	2.46446	0.0348571	0.752646	+	39.6077	31.2749	28.4503	28.8206	45.3122	43.5834	37.9478	31.6403	38.8702	51.4276	53.2342	39.1185	38.4863	54.5885	42.6653	62.4798	43.9257
Uncharacterized ABC transporter ATP-binding protein sll0415	sll0415	P22040	Y415_SYNY3			ATP binding [GO:0005524];ATPase activity [GO:0016887]	ATP binding [GO:0005524];ATPase activity [GO:0016887]	354	7	7	7	36.4	39.5	0	100.98	811540000	86	1	-0.189913	0.39357	0.564914	-0.582584	0.116209	0.862786	-0.220515	0.0662435	0.915201	-0.139053	0.0441712	0.927945	-0.0963342		0.181056	0.574721	0.786256	0.698934	0.144039	0.244331	0.531722	0.153349	0.95886	0.223256	0.18675	0.248924	0.143973	0.215435	0.758485	0.632579	0.580671
Chaperone protein dnaK2 (HSP70-2) (Heat shock 70 kDa protein 2) (Heat shock protein 70-2)	dnaK2 dnaK sll0170	P22358	DNAK2_SYNY3	protein folding [GO:0006457]		ATP binding [GO:0005524];unfolded protein binding [GO:0051082]	ATP binding [GO:0005524];protein folding [GO:0006457];unfolded protein binding [GO:0051082]	636	62	62	62	73.4	67.613	0	323.31	102540000000	1635	1	0.226607	1.66265	0.250869	0.416796	1.11972	0.421221	0.342745	1.3118	0.316275	0.415407	2.04346	0.0449217	0.735046	+	16.4899	16.473	13.9141	13.094	20.2455	19.8974	18.0978	16.8117	15.1568	23.9486	19.4849	18.6911	19.2165	26.6622	22.7657	26.8978	18.9746
50S ribosomal protein L7/L12	rplL rpl12 sll1746	P23349	RL7_SYNY3	translation [GO:0006412]	ribosome [GO:0005840]	structural constituent of ribosome [GO:0003735]	ribosome [GO:0005840];structural constituent of ribosome [GO:0003735];translation [GO:0006412]	128	9	9	9	64.8	13.259	0	180.34	14379000000	224	1	0.219227	0.384162	0.650705	0.204756	1.17885	0.419732	0.318705	0.945372	0.423043	0.297287	0.614948	0.458919	0.222326		12.2525	12.246	13.1434	9.68551	17.2345	17.0288	12.1631	15.688	13.5648	15.9664	18.8368	14.1495	15.5395	18.25	8.855	18.7461	15.6913
50S ribosomal protein L10	rplJ rpl10 sll1745	P23350	RL10_SYNY3	ribosome biogenesis [GO:0042254];translation [GO:0006412]	cytosolic large ribosomal subunit [GO:0022625]	rRNA binding [GO:0019843];structural constituent of ribosome [GO:0003735]	cytosolic large ribosomal subunit [GO:0022625];ribosome biogenesis [GO:0042254];rRNA binding [GO:0019843];structural constituent of ribosome [GO:0003735];translation [GO:0006412]	173	13	13	13	83.2	18.675	0	323.31	13495000000	161	1	0.159747	0.724844	0.48205	0.247836	0.477998	0.651682	0.210925	1.59915	0.261214	0.495127	2.04831	0.0652509	0.536966		9.00989	8.24337	9.7789	8.2542	13.5792	10.728	9.0251	8.6057	12.0444	14.1112	11.2995	9.09314	11.4531	14.6561	11.1424	11.4052	11.3522
Chorismate synthase (CS) (EC 4.2.3.5) (5-enolpyruvylshikimate-3-phosphate phospholyase)	aroC sll1747	P23353	AROC_SYNY3	aromatic amino acid family biosynthetic process [GO:0009073];chorismate biosynthetic process [GO:0009423]	cytosol [GO:0005829]	chorismate synthase activity [GO:0004107];FMN binding [GO:0010181]	aromatic amino acid family biosynthetic process [GO:0009073];chorismate biosynthetic process [GO:0009423];chorismate synthase activity [GO:0004107];cytosol [GO:0005829];FMN binding [GO:0010181]	362	16	16	16	56.4	39.287	0	323.31	6806900000	308	1	-0.0100731	0.476846	0.726191	0.0926761	0.135048	0.907756	0.0405854	0.236871	0.850975	0.0535669	0.23817	0.845972	0.0380857		2.5083	2.22058	2.18976	2.30398	2.1803	2.16296	2.12012	2.15546	2.72998	2.19264	2.57377	2.74952	2.05362	2.64657	2.19633	2.70067	1.79178
Bacterioferritin (BFR) (EC 1.16.3.1)	bfr sll1341	P24602	BFR_SYNY3	cellular iron ion homeostasis [GO:0006879];iron ion transport [GO:0006826]	cell [GO:0005623]	ferric iron binding [GO:0008199];ferroxidase activity [GO:0004322]	cell [GO:0005623];cellular iron ion homeostasis [GO:0006879];ferric iron binding [GO:0008199];ferroxidase activity [GO:0004322];iron ion transport [GO:0006826]	156	9	9	9	68.6	18.331	0	323.31	5108900000	144	1	-0.280253	0.569367	0.505287	-0.327504	0.303535	0.708883	-0.248875	0.387896	0.638522	-0.283273	1.22262	0.124314	-0.645054		7.51154	4.07425	6.28482	3.91396	2.61739	4.05951	4.43103	4.55292	4.77894	1.90603	3.65452	3.53149	4.25445	3.31159	3.48291	3.84642	3.48847
Cytochrome f	petA sll1317	P26287	CYF_SYNY3	photosynthesis [GO:0015979]	cytochrome b6f complex [GO:0009512];integral component of thylakoid membrane [GO:0031361]	electron transfer activity [GO:0009055];heme binding [GO:0020037];iron ion binding [GO:0005506]	cytochrome b6f complex [GO:0009512];electron transfer activity [GO:0009055];heme binding [GO:0020037];integral component of thylakoid membrane [GO:0031361];iron ion binding [GO:0005506];photosynthesis [GO:0015979]	328	17	17	17	52.1	35.23	0	323.31	31211000000	530	1	-0.0587128	0.225401	0.813533	-0.0865838	0.341696	0.745573	0.129345	0.318675	0.766212	-0.109553	1.4253	0.177186	-0.324294		15.7427	26.6587	21.9686	23.0777	21.8601	21.9646	22.6972	21.0346	20.6962	17.4853	19.9509	23.5683	19.4429	23.0058	16.3815	22.5744	24.6018
Cytochrome b6-f complex iron-sulfur subunit 2 (EC 1.10.9.1) (Plastohydroquinone:plastocyanin oxidoreductase iron-sulfur protein 2) (ISP 2) (RISP 2) (Rieske iron-sulfur protein 2)	petC2 sll1316	P26290	UCRIB_SYNY3	photosynthesis [GO:0015979]	integral component of membrane [GO:0016021];thylakoid membrane [GO:0042651]	2 iron, 2 sulfur cluster binding [GO:0051537];electron transporter, transferring electrons within cytochrome b6/f complex of photosystem II activity [GO:0045158];metal ion binding [GO:0046872];plastoquinol--plastocyanin reductase activity [GO:0009496]	2 iron, 2 sulfur cluster binding [GO:0051537];electron transporter, transferring electrons within cytochrome b6/f complex of photosystem II activity [GO:0045158];integral component of membrane [GO:0016021];metal ion binding [GO:0046872];photosynthesis [GO:0015979];plastoquinol--plastocyanin reductase activity [GO:0009496];thylakoid membrane [GO:0042651]	180	9	9	9	51.1	18.996	0	323.31	15090000000	255	1	-0.230433	1.28369	0.306921	-0.343764	0.823303	0.531721	-0.231835	1.25597	0.341575	-0.353953	1.5092	0.134609	-0.404934		11.3106	12.1437	17.3754	14.1657	12.2145	12.1898	9.56684	11.0287	13.7675	10.4931	12.2506	9.30482	11.5057	11.3516	8.42626	11.0588	11.0066
NAD(P)H-quinone oxidoreductase subunit 1 (EC 1.6.5.-) (NAD(P)H dehydrogenase I subunit 1) (NDH-1 subunit 1) (NDH-A)	ndhA sll0519	P26522	NU1C_SYNY3	cellular respiration [GO:0045333]	integral component of membrane [GO:0016021];thylakoid membrane [GO:0042651]	oxidoreductase activity [GO:0016491];quinone binding [GO:0048038]	cellular respiration [GO:0045333];integral component of membrane [GO:0016021];oxidoreductase activity [GO:0016491];quinone binding [GO:0048038];thylakoid membrane [GO:0042651]	372	4	4	4	16.9	40.548	0	102.76	2896500000	63	1	0.201647	0.667416	0.430668	0.404156	1.6337	0.393418	0.691285	0.233165	0.769254	0.185887	0.021455	0.967903	-0.0217343		1.34556	2.18909	0.905867	1.5335	1.17791	2.14757	2.21674	1.96318	0.648641	1.59922	2.23563	2.22974	1.32572	2.44821	1.2089	2.5557	2.30664
NAD(P)H-quinone oxidoreductase chain 6 (EC 1.6.5.-) (NAD(P)H dehydrogenase I, chain 6) (NDH-1, chain 6)	ndhG sll0521	P26523	NU6C_SYNY3		integral component of membrane [GO:0016021]	NADH dehydrogenase (ubiquinone) activity [GO:0008137];quinone binding [GO:0048038]	integral component of membrane [GO:0016021];NADH dehydrogenase (ubiquinone) activity [GO:0008137];quinone binding [GO:0048038]	198	4	4	4	12.1	21.522	0	103.15	1651100000	106	1	-0.129693	0.727078	0.387113	0.509536	1.54254	0.389185	0.782105	0.239279	0.744894	0.256667	0.0341336	0.947857	-0.0430142		2.08523	3.82096	1.4452	1.57629	3.04201	2.95142	3.16706	3.09855	0.751056	1.6193	3.6601	3.48916	1.77519	4.57803	3.1106	4.40615	4.31121
NAD(P)H-quinone oxidoreductase subunit I (EC 1.6.5.-) (NAD(P)H dehydrogenase I subunit I) (NDH-1 subunit I) (NDH-I)	ndhI sll0520	P26525	NDHI_SYNY3		thylakoid membrane [GO:0042651]	4 iron, 4 sulfur cluster binding [GO:0051539];metal ion binding [GO:0046872];NADH dehydrogenase (ubiquinone) activity [GO:0008137];quinone binding [GO:0048038]	4 iron, 4 sulfur cluster binding [GO:0051539];metal ion binding [GO:0046872];NADH dehydrogenase (ubiquinone) activity [GO:0008137];quinone binding [GO:0048038];thylakoid membrane [GO:0042651]	193	11	11	11	60.6	22.15	0	127.53	4151300000	100	1	0.024027	0.150769	0.877796	-0.0709239	0.120037	0.895193	0.0684654	0.909731	0.545895	0.165087	0.321791	0.689153	0.126186		2.21823	2.05101	2.23159	1.86688	2.54952	2.05538	2.24162	1.71237	2.39611	2.77824	1.68504	1.49265	2.34953	2.78915	2.29293	1.3748	2.22869
ATP synthase subunit beta (EC 3.6.3.14) (ATP synthase F1 sector subunit beta) (F-ATPase subunit beta)	atpD atpB slr1329	P26527	ATPB_SYNY3	ATP synthesis coupled proton transport [GO:0015986]	plasma membrane proton-transporting ATP synthase complex [GO:0045260];proton-transporting ATP synthase complex, catalytic core F(1) [GO:0045261];thylakoid membrane [GO:0042651]	ATP binding [GO:0005524];proton-transporting ATP synthase activity, rotational mechanism [GO:0046933]	ATP binding [GO:0005524];ATP synthesis coupled proton transport [GO:0015986];plasma membrane proton-transporting ATP synthase complex [GO:0045260];proton-transporting ATP synthase activity, rotational mechanism [GO:0046933];proton-transporting ATP synthase complex, catalytic core F(1) [GO:0045261];thylakoid membrane [GO:0042651]	483	44	44	44	96.1	51.732	0	323.31	288760000000	1681	1	0.208267	1.42729	0.258264	0.454716	1.41743	0.393192	0.477625	1.18666	0.316268	0.479867	1.70171	0.0986699	0.472266		56.7288	65.2829	58.2333	55.9253	98.1439	85.5803	74.1792	62.4614	69.3773	88.5592	94.7322	88.1555	72.6188	111.162	84.9	117.272	95.1211
ATP synthase epsilon chain (ATP synthase F1 sector epsilon subunit) (F-ATPase epsilon subunit)	atpC atpE slr1330	P26533	ATPE_SYNY3	ATP synthesis coupled proton transport [GO:0015986]	plasma membrane proton-transporting ATP synthase complex [GO:0045260];proton-transporting ATP synthase complex, catalytic core F(1) [GO:0045261];thylakoid membrane [GO:0042651]	proton-transporting ATP synthase activity, rotational mechanism [GO:0046933]	ATP synthesis coupled proton transport [GO:0015986];plasma membrane proton-transporting ATP synthase complex [GO:0045260];proton-transporting ATP synthase activity, rotational mechanism [GO:0046933];proton-transporting ATP synthase complex, catalytic core F(1) [GO:0045261];thylakoid membrane [GO:0042651]	136	5	5	5	38.2	14.58	0	164.12	3849300000	116	1	-0.141233	0.13111	0.892777	-0.0632838	0.18152	0.848301	0.0921255	0.290792	0.751259	0.143987	0.320543	0.656321	0.159426		5.9666	5.39616	9.48976	5.71411	7.86871	7.1241	4.67201	5.95827	8.20949	5.17217	7.66392	5.95202	6.91664	6.75861	5.17369	9.668	6.39079
ATP synthase subunit a (ATP synthase F0 sector subunit a) (F-ATPase subunit 6)	atpB atpI sll1322	P27178	ATP6_SYNY3	ATP synthesis coupled proton transport [GO:0015986]	integral component of plasma membrane [GO:0005887];proton-transporting ATP synthase complex, coupling factor F(o) [GO:0045263];thylakoid membrane [GO:0042651]	proton-transporting ATP synthase activity, rotational mechanism [GO:0046933]	ATP synthesis coupled proton transport [GO:0015986];integral component of plasma membrane [GO:0005887];proton-transporting ATP synthase activity, rotational mechanism [GO:0046933];proton-transporting ATP synthase complex, coupling factor F(o) [GO:0045263];thylakoid membrane [GO:0042651]	276	4	4	4	18.5	30.698	0	115.39	2307000000	130	1	1.57387	0.837297	0.283099	1.95204	1.83717	0.302933	2.72689	0.402799	0.556221	1.04501	0.129094	0.790224	0.358366		0.398461	3.43292	0.198137	0.145706	0.546134	1.93698	3.7757	1.78348	0.200725	1.92622	2.67026	5.26371	0.166948	4.85788	1.64068	4.34729	4.23744
ATP synthase subunit alpha (EC 3.6.3.14) (ATP synthase F1 sector subunit alpha) (F-ATPase subunit alpha)	atpA sll1326	P27179	ATPA_SYNY3	ATP synthesis coupled proton transport [GO:0015986]	plasma membrane proton-transporting ATP synthase complex [GO:0045260];proton-transporting ATP synthase complex, catalytic core F(1) [GO:0045261];thylakoid membrane [GO:0042651]	ATP binding [GO:0005524];proton-transporting ATP synthase activity, rotational mechanism [GO:0046933]	ATP binding [GO:0005524];ATP synthesis coupled proton transport [GO:0015986];plasma membrane proton-transporting ATP synthase complex [GO:0045260];proton-transporting ATP synthase activity, rotational mechanism [GO:0046933];proton-transporting ATP synthase complex, catalytic core F(1) [GO:0045261];thylakoid membrane [GO:0042651]	503	37	37	37	69.2	53.965	0	323.31	293890000000	1589	1	0.0195669	0.745413	0.56614	0.158776	0.761005	0.563935	0.196405	1.00067	0.429728	0.264527	1.73081	0.187352	0.257286		87.173	82.7699	89.7706	79.0629	109.162	94.1708	80.1562	77.2998	93.8635	109.233	102.892	89.4109	89.0147	116.641	101.469	124.329	85.2362
ATP synthase subunit delta (ATP synthase F(1) sector subunit delta) (F-type ATPase subunit delta) (F-ATPase subunit delta)	atpH atpD sll1325	P27180	ATPD_SYNY3	ATP synthesis coupled proton transport [GO:0015986]	plasma membrane proton-transporting ATP synthase complex [GO:0045260];proton-transporting ATP synthase complex, catalytic core F(1) [GO:0045261];thylakoid membrane [GO:0042651]	proton-transporting ATP synthase activity, rotational mechanism [GO:0046933]	ATP synthesis coupled proton transport [GO:0015986];plasma membrane proton-transporting ATP synthase complex [GO:0045260];proton-transporting ATP synthase activity, rotational mechanism [GO:0046933];proton-transporting ATP synthase complex, catalytic core F(1) [GO:0045261];thylakoid membrane [GO:0042651]	185	16	16	16	92.4	20.093	0	323.31	14835000000	437	1	0.0115669	0.275597	0.70213	0.280896	1.27929	0.392294	0.528405	0.344157	0.685712	0.212167	0.0764029	0.905349	-0.0444943		8.58197	12.2936	8.94866	5.82165	9.47566	8.44096	11.3872	7.68526	6.74114	10.8865	14.4208	15.2621	3.70268	11.0221	15.3492	16.3727	11.938
ATP synthase subunit b (ATP synthase F(0) sector subunit b) (ATPase subunit I) (F-type ATPase subunit b) (F-ATPase subunit b)	atpF sll1324	P27181	ATPF_SYNY3	ATP synthesis coupled proton transport [GO:0015986]	integral component of membrane [GO:0016021];plasma membrane proton-transporting ATP synthase complex [GO:0045260];proton-transporting ATP synthase complex, coupling factor F(o) [GO:0045263];thylakoid membrane [GO:0042651]	hydrogen ion transmembrane transporter activity [GO:0015078]	ATP synthesis coupled proton transport [GO:0015986];hydrogen ion transmembrane transporter activity [GO:0015078];integral component of membrane [GO:0016021];plasma membrane proton-transporting ATP synthase complex [GO:0045260];proton-transporting ATP synthase complex, coupling factor F(o) [GO:0045263];thylakoid membrane [GO:0042651]	179	18	18	18	60.3	19.804	0	323.31	12163000000	294	1	-0.082973	0.178501	0.847538	0.0847762	0.214129	0.823502	0.106605	0.0877257	0.916911	0.046527	0.233104	0.757135	0.0944859		12.125	7.71055	11.8349	8.46042	13.6926	9.47356	7.58339	10.3474	9.88878	13.0789	13.9605	9.41316	11.4706	11.2912	10.1029	13.3209	8.2907
ATP synthase subunit c (ATP synthase F(0) sector subunit c) (F-type ATPase subunit c) (F-ATPase subunit c) (Lipid-binding protein)	atpE atpH ssl2615	P27182	ATPL_SYNY3	ATP hydrolysis coupled proton transport [GO:0015991];ATP synthesis coupled proton transport [GO:0015986]	integral component of membrane [GO:0016021];proton-transporting ATP synthase complex, coupling factor F(o) [GO:0045263];thylakoid membrane [GO:0042651]	lipid binding [GO:0008289];proton-transporting ATP synthase activity, rotational mechanism [GO:0046933]	ATP hydrolysis coupled proton transport [GO:0015991];ATP synthesis coupled proton transport [GO:0015986];integral component of membrane [GO:0016021];lipid binding [GO:0008289];proton-transporting ATP synthase activity, rotational mechanism [GO:0046933];proton-transporting ATP synthase complex, coupling factor F(o) [GO:0045263];thylakoid membrane [GO:0042651]	81	2	2	2	61.7	7.9683	0	214.43	189790000	41	1	-0.439313	0.00817449	0.993273	-0.0167039	0.0927147	0.894531	0.153805	0.678182	0.395058	0.874867	1.36423	0.0736736	1.14835		1.73449	0.44802	0.412902	1.61667	0.856501	0.976849	0.367813	0.827364	0.171608	1.89996	1.08094	0.461173	1.47987	0.277994	2.04456	1.75737	0.43464
ATP synthase subunit b' (ATP synthase F(0) sector subunit b') (ATPase subunit II) (F-type ATPase subunit b') (F-ATPase subunit b')	atpG sll1323	P27183	ATPX_SYNY3	ATP synthesis coupled proton transport [GO:0015986]	integral component of membrane [GO:0016021];plasma membrane proton-transporting ATP synthase complex [GO:0045260];proton-transporting ATP synthase complex, coupling factor F(o) [GO:0045263];thylakoid membrane [GO:0042651]	hydrogen ion transmembrane transporter activity [GO:0015078]	ATP synthesis coupled proton transport [GO:0015986];hydrogen ion transmembrane transporter activity [GO:0015078];integral component of membrane [GO:0016021];plasma membrane proton-transporting ATP synthase complex [GO:0045260];proton-transporting ATP synthase complex, coupling factor F(o) [GO:0045263];thylakoid membrane [GO:0042651]	143	9	9	9	59.4	16.245	0	323.31	5116100000	191	1	-0.0623131	0.194745	0.830932	0.0880761	0.334844	0.735029	-0.151215	0.624058	0.529463	0.275187	0.854182	0.308563	0.312746		3.90984	4.57013	6.96041	3.6625	5.65618	3.99559	3.0488	5.13083	4.72853	7.02438	4.88271	5.02624	5.57075	5.5934	4.5719	4.52876	4.70891
Ferredoxin-1 (Ferredoxin I)	petF fed ssl0020	P27320	FER_SYNY3			2 iron, 2 sulfur cluster binding [GO:0051537];electron transfer activity [GO:0009055];metal ion binding [GO:0046872]	2 iron, 2 sulfur cluster binding [GO:0051537];electron transfer activity [GO:0009055];metal ion binding [GO:0046872]	97	2	2	2	41.2	10.363	0	132.54	6506100000	97	1	-0.344513	0.422152	0.609431	0.264096	0.744928	0.504889	0.326525	0.436732	0.632205	0.229047	0.0887365	0.874995	-0.0789945		12.632	22.9932	28.4957	19.7315	24.9631	14.6752	19.1695	25.7374	29.0767	5.8676	23.1619	28.6861	15.8892	36.5532	26.384	25.3729	22.0406
Cytochrome b6-f complex subunit 4 (17 kDa polypeptide)	petD slr0343	P27589	PETD_SYNY3	photosynthetic electron transport chain [GO:0009767]	cytochrome b6f complex [GO:0009512];integral component of membrane [GO:0016021];thylakoid membrane [GO:0042651]	electron transporter, transferring electrons within the cyclic electron transport pathway of photosynthesis activity [GO:0045156]	cytochrome b6f complex [GO:0009512];electron transporter, transferring electrons within the cyclic electron transport pathway of photosynthesis activity [GO:0045156];integral component of membrane [GO:0016021];photosynthetic electron transport chain [GO:0009767];thylakoid membrane [GO:0042651]	160	3	3	3	13.1	17.444	0	78.362	6539600000	86	1	-0.402313	0.882729	0.319662	-0.648044	0.586743	0.51183	-0.542415	1.15111	0.276453	-0.716533	0.978781	0.199336	-0.503534		24.8317	14.5862	21.0635	15.9185	8.72785	14.3225	6.67257	13.1884	15.0333	13.8736	14.919	5.80855	15.6216	7.18519	11.5322	13.2564	12.6924
NAD(P)H-quinone oxidoreductase subunit H (EC 1.6.5.-) (NAD(P)H dehydrogenase subunit H) (NADH-plastoquinone oxidoreductase subunit H) (NDH-1 subunit H) (NDH-H)	ndhH slr0261	P27724	NDHH_SYNY3		thylakoid membrane [GO:0042651]	NAD binding [GO:0051287];oxidoreductase activity, acting on NAD(P)H [GO:0016651];quinone binding [GO:0048038]	NAD binding [GO:0051287];oxidoreductase activity, acting on NAD(P)H [GO:0016651];quinone binding [GO:0048038];thylakoid membrane [GO:0042651]	394	18	18	18	51	45.534	0	323.31	11026000000	340	1	0.023027	0.367941	0.804703	-0.0601238	0.651238	0.772039	0.0667854	0.0846656	0.945238	0.0231269	0.300312	0.797544	0.0510658		3.91472	3.83874	3.52659	3.41226	3.83899	4.19365	3.73431	4.13616	2.8671	4.04873	3.82056	3.76116	3.56715	3.02268	3.63787	4.0262	3.94218
Elongation factor G 1 (EF-G 1)	fusA fus slr1463	P28371	EFG1_SYNY3		cytoplasm [GO:0005737]	GTP binding [GO:0005525];GTPase activity [GO:0003924];translation elongation factor activity [GO:0003746]	cytoplasm [GO:0005737];GTP binding [GO:0005525];GTPase activity [GO:0003924];translation elongation factor activity [GO:0003746]	695	54	54	54	82.6	76.749	0	323.31	104300000000	1443	1	0.154707	1.21943	0.306929	0.381216	0.819996	0.469826	0.353265	1.2364	0.313412	0.453427	2.34456	0.0419192	0.641466	+	13.1329	14.8134	12.8053	12.7068	21.9405	17.7421	15.1154	14.0636	14.087	22.3464	18.1435	16.6908	17.2757	22.2854	22.3266	23.5184	20.0857
Light-independent protochlorophyllide reductase subunit N (DPOR subunit N) (LI-POR subunit N) (EC 1.3.7.7)	chlN slr0750	P28372	CHLN_SYNY3	light-independent chlorophyll biosynthetic process [GO:0036068];photosynthesis, dark reaction [GO:0019685]		4 iron, 4 sulfur cluster binding [GO:0051539];ATP binding [GO:0005524];metal ion binding [GO:0046872];oxidoreductase activity, acting on iron-sulfur proteins as donors [GO:0016730]	4 iron, 4 sulfur cluster binding [GO:0051539];ATP binding [GO:0005524];light-independent chlorophyll biosynthetic process [GO:0036068];metal ion binding [GO:0046872];oxidoreductase activity, acting on iron-sulfur proteins as donors [GO:0016730];photosynthesis, dark reaction [GO:0019685]	469	8	8	8	24.5	52.474	0	53.234	528160000	83	1	0.410667	2.95815	0.191	1.4272	1.38814	0.414366	0.882765	1.95312	0.283172	1.12025	1.69296	0.0498992	1.07055	+	0.07833	0.0831082	0.089695	0.0411669	0.118925	0.16196	0.124356	0.0650726	0.0651086	0.13905	0.178474	0.208321	0.178448	0.201329	0.301012	0.17585	0.148167
Light-independent protochlorophyllide reductase iron-sulfur ATP-binding protein (DPOR subunit L) (LI-POR subunit L) (EC 1.3.7.7)	chlL frxC slr0749	P28373	CHLL_SYNY3	light-independent chlorophyll biosynthetic process [GO:0036068];photosynthesis, dark reaction [GO:0019685]		4 iron, 4 sulfur cluster binding [GO:0051539];ATP binding [GO:0005524];metal ion binding [GO:0046872];oxidoreductase activity, acting on iron-sulfur proteins as donors [GO:0016730]	4 iron, 4 sulfur cluster binding [GO:0051539];ATP binding [GO:0005524];light-independent chlorophyll biosynthetic process [GO:0036068];metal ion binding [GO:0046872];oxidoreductase activity, acting on iron-sulfur proteins as donors [GO:0016730];photosynthesis, dark reaction [GO:0019685]	288	6	6	6	37.5	31.48	0	99.852	825410000	93	1	1.94857	1.40452	0.216179	3.03768	1.17808	0.395143	2.62742	1.42926	0.262691	3.07259	1.50277	0.0419707	3.20702	+	0.296234	0.0185458	0.196755		0.402267	0.304056	0.218173	0.154716	0.420825	0.545356	0.376594	0.399143	0.646119	0.957023	1.10435	0.575791	0.383525
Glutamyl-tRNA reductase (GluTR) (EC 1.2.1.70)	hemA slr1808	P28463	HEM1_SYNY3	chlorophyll biosynthetic process [GO:0015995];protoporphyrinogen IX biosynthetic process [GO:0006782]		glutamyl-tRNA reductase activity [GO:0008883];NADP binding [GO:0050661]	chlorophyll biosynthetic process [GO:0015995];glutamyl-tRNA reductase activity [GO:0008883];NADP binding [GO:0050661];protoporphyrinogen IX biosynthetic process [GO:0006782]	427	15	15	15	37.7	47.525	0	253.2	2923200000	219	1	0.205707	1.23527	0.341148	0.295356	0.87141	0.470643	0.322085	0.646957	0.528768	0.260887	0.980937	0.302007	0.267406		0.62378	0.688169	0.533726	0.641281	0.911697	0.792349	0.712342	0.682875	0.795477	0.891231	0.805291	0.825808	0.743638	0.849112	0.887853	1.08374	0.744371
Ketol-acid reductoisomerase (NADP(+)) (KARI) (EC 1.1.1.86) (Acetohydroxy-acid isomeroreductase) (AHIR) (Alpha-keto-beta-hydroxylacyl reductoisomerase) (Ketol-acid reductoisomerase type 1) (Ketol-acid reductoisomerase type I)	ilvC sll1363	P29107	ILVC_SYNY3	isoleucine biosynthetic process [GO:0009097];valine biosynthetic process [GO:0009099]		ketol-acid reductoisomerase activity [GO:0004455];metal ion binding [GO:0046872];NADP binding [GO:0050661]	isoleucine biosynthetic process [GO:0009097];ketol-acid reductoisomerase activity [GO:0004455];metal ion binding [GO:0046872];NADP binding [GO:0050661];valine biosynthetic process [GO:0009099]	331	31	31	31	77.6	35.821	0	323.31	118780000000	1052	1	0.117227	1.39422	0.373256	0.224036	0.298497	0.794325	0.0961654	1.10458	0.424336	0.246727	0.704304	0.508151	0.149526		43.9963	36.2381	35.5696	34.9914	42.6397	42.0055	39.7434	35.6491	49.8455	42.8188	49.69	42.4496	40.4361	49.2321	43.801	41.5397	45.4968
Photosystem I P700 chlorophyll a apoprotein A1 (EC 1.97.1.12) (PsaA)	psaA slr1834	P29254	PSAA_SYNY3	photosynthesis [GO:0015979];protein-chromophore linkage [GO:0018298]	integral component of membrane [GO:0016021];plasma membrane-derived photosystem I [GO:0030094];thylakoid membrane [GO:0042651]	4 iron, 4 sulfur cluster binding [GO:0051539];chlorophyll binding [GO:0016168];metal ion binding [GO:0046872];oxidoreductase activity [GO:0016491]	4 iron, 4 sulfur cluster binding [GO:0051539];chlorophyll binding [GO:0016168];integral component of membrane [GO:0016021];metal ion binding [GO:0046872];oxidoreductase activity [GO:0016491];photosynthesis [GO:0015979];plasma membrane-derived photosystem I [GO:0030094];protein-chromophore linkage [GO:0018298];thylakoid membrane [GO:0042651]	751	24	24	24	23.8	82.949	0	323.31	321910000000	864	1	-0.186653	1.00999	0.305763	-0.517024	0.72919	0.514072	-0.308355	0.792975	0.42457	-0.390533	1.86603	0.0418128	-1.03379	+	202.266	138.336	202.682	210.508	137.408	189.336	148.153	177.355	194.186	88.9222	150.862	146.594	173.269	101.612	70.2094	117.053	130.165
Photosystem I P700 chlorophyll a apoprotein A2 (EC 1.97.1.12) (PsaB)	psaB slr1835	P29255	PSAB_SYNY3	photosynthesis [GO:0015979];protein-chromophore linkage [GO:0018298]	integral component of membrane [GO:0016021];plasma membrane-derived photosystem I [GO:0030094];thylakoid membrane [GO:0042651]	4 iron, 4 sulfur cluster binding [GO:0051539];chlorophyll binding [GO:0016168];metal ion binding [GO:0046872];oxidoreductase activity [GO:0016491]	4 iron, 4 sulfur cluster binding [GO:0051539];chlorophyll binding [GO:0016168];integral component of membrane [GO:0016021];metal ion binding [GO:0046872];oxidoreductase activity [GO:0016491];photosynthesis [GO:0015979];plasma membrane-derived photosystem I [GO:0030094];protein-chromophore linkage [GO:0018298];thylakoid membrane [GO:0042651]	731	18	18	18	20.8	81.291	0	323.31	188710000000	820	1	-0.0654131	0.6219	0.481701	-0.318804	0.248208	0.800398	-0.113835	0.613393	0.531267	-0.279073	2.08419	0.0357568	-1.05179	+	108.226	128.581	122.741	140.851	107.012	148.581	133.597	134.671	122.106	62.8731	116.839	130.914	120.248	87.6284	52.9109	87.9991	116.743
Photosystem I reaction center subunit III (PSI-F)	psaF sll0819	P29256	PSAF_SYNY3	photosynthesis [GO:0015979]	photosystem I reaction center [GO:0009538];plasma membrane-derived photosystem I [GO:0030094]		photosynthesis [GO:0015979];photosystem I reaction center [GO:0009538];plasma membrane-derived photosystem I [GO:0030094]	165	14	14	14	57.6	18.249	0	323.31	150360000000	534	1	-0.291633	1.24779	0.256413	-0.618264	1.00253	0.423247	-0.427015	1.73416	0.249096	-0.551933	2.7978	0.0270909	-1.18233	+	206.759	229.752	266.016	236.833	188.488	172.327	218.796	208.629	249.396	104.653	177.476	204.758	192.121	123.711	76.6329	131.436	136.627
Phytoene dehydrogenase (EC 1.3.99.-) (Phytoene desaturase)	pds crtD slr1254	P29273	CRTI_SYNY3	carotenoid biosynthetic process [GO:0016117];response to herbicide [GO:0009635]	plasma membrane [GO:0005886]	oxidoreductase activity, acting on paired donors, with incorporation or reduction of molecular oxygen [GO:0016705]	carotenoid biosynthetic process [GO:0016117];oxidoreductase activity, acting on paired donors, with incorporation or reduction of molecular oxygen [GO:0016705];plasma membrane [GO:0005886];response to herbicide [GO:0009635]	472	16	16	16	37.9	52.92	0	258	3137400000	265	1	-0.115753	0.616168	0.470099	0.359656	1.21698	0.405193	0.393565	1.43599	0.258916	0.553727	1.8472	0.0441475	0.976406	+	0.412627	0.580205	0.616414	0.589894	0.624004	0.396367	0.545572	0.441319	0.441869	0.862485	0.598234	0.450587	0.585715	1.00565	1.18994	0.921028	0.798738
NAD(P)H-quinone oxidoreductase chain 4-1 (EC 1.6.5.-) (NAD(P)H dehydrogenase I, subunit D-1) (NDH-1, chain 4-1)	ndhD1 ndhD slr0331	P32421	NU4C1_SYNY3	ATP synthesis coupled electron transport [GO:0042773]	integral component of membrane [GO:0016021];thylakoid membrane [GO:0042651]	NADH dehydrogenase (ubiquinone) activity [GO:0008137];quinone binding [GO:0048038]	ATP synthesis coupled electron transport [GO:0042773];integral component of membrane [GO:0016021];NADH dehydrogenase (ubiquinone) activity [GO:0008137];quinone binding [GO:0048038];thylakoid membrane [GO:0042651]	525	3	3	3	12.8	57.51	0	111.1	659900000	83	1	0.182267	0.248054	0.748638	0.178496	0.906474	0.41943	0.491765	0.283399	0.730825	0.201387	0.340568	0.585626	-0.267334		0.35498	0.606944	0.257773	0.538952	0.694106	0.589681	0.65558	0.684202	0.29197	0.505987	0.630725	0.667749	0.421374	0.438098	0.496062	0.759656	0.61344
Photosystem I iron-sulfur center (EC 1.97.1.12) (9 kDa polypeptide) (PSI-C) (Photosystem I subunit VII) (PsaC)	psaC ssl0563	P32422	PSAC_SYNY3	photosynthetic electron transport in photosystem I [GO:0009773]	photosystem I [GO:0009522];thylakoid membrane [GO:0042651]	4 iron, 4 sulfur cluster binding [GO:0051539];electron transfer activity [GO:0009055];metal ion binding [GO:0046872]	4 iron, 4 sulfur cluster binding [GO:0051539];electron transfer activity [GO:0009055];metal ion binding [GO:0046872];photosynthetic electron transport in photosystem I [GO:0009773];photosystem I [GO:0009522];thylakoid membrane [GO:0042651]	81	10	10	10	85.2	8.8282	0	323.31	77939000000	297	1	-0.330673	1.32246	0.24904	-0.729004	1.49478	0.407402	-0.581394	1.57499	0.246519	-0.642233	2.46386	0.0259241	-1.18113	+	178.145	115.611	191.509	138.816	114.169	142.865	111.929	114.325	176.496	61.5877	116	107.611	122.274	72.3001	45.2797	95.4132	81.1936
Global nitrogen regulator	ntcA sll1423	P33779	NTCA_SYNY3	transcription, DNA-templated [GO:0006351]	intracellular [GO:0005622]	DNA binding [GO:0003677];DNA binding transcription factor activity [GO:0003700]	DNA binding [GO:0003677];DNA binding transcription factor activity [GO:0003700];intracellular [GO:0005622];transcription, DNA-templated [GO:0006351]	225	11	11	11	46.7	25.046	0	139.92	1351800000	116	1	-0.071953	0.345582	0.701069	0.163776	0.442519	0.648153	0.249605	0.128024	0.894899	-0.0533731	0.542819	0.450966	-0.292754		0.863345	0.615629	0.648767	0.563711	0.774495	0.765571	0.547353	0.783222	0.589021	0.606875	0.823353	0.940225	0.567807	1.02472	0.589594	0.872494	1.14171
50S ribosomal protein L1	rplA rpl1 sll1744	P36236	RL1_SYNY3	maturation of LSU-rRNA [GO:0000470];regulation of translation [GO:0006417];translation [GO:0006412]	cytosolic large ribosomal subunit [GO:0022625]	RNA binding [GO:0003723];rRNA binding [GO:0019843];structural constituent of ribosome [GO:0003735];tRNA binding [GO:0000049]	cytosolic large ribosomal subunit [GO:0022625];maturation of LSU-rRNA [GO:0000470];regulation of translation [GO:0006417];RNA binding [GO:0003723];rRNA binding [GO:0019843];structural constituent of ribosome [GO:0003735];translation [GO:0006412];tRNA binding [GO:0000049]	238	23	23	23	81.5	25.852	0	323.31	60705000000	503	1	0.186607	1.12459	0.329663	0.358436	0.654722	0.551836	0.268445	0.808635	0.42841	0.369307	1.45397	0.125235	0.456306		25.5369	19.1018	25.2441	21.348	37.2257	31.6275	24.8133	24.139	29.2445	33.7256	34.1564	27.7377	30.6618	35.6647	32.713	38.1132	26.8769
50S ribosomal protein L11	rplK rpl11 sll1743	P36237	RL11_SYNY3	ribosomal large subunit assembly [GO:0000027];translation [GO:0006412]	cytosolic large ribosomal subunit [GO:0022625]	rRNA binding [GO:0019843];structural constituent of ribosome [GO:0003735]	cytosolic large ribosomal subunit [GO:0022625];ribosomal large subunit assembly [GO:0000027];rRNA binding [GO:0019843];structural constituent of ribosome [GO:0003735];translation [GO:0006412]	141	10	10	10	68.8	14.977	0	323.31	38260000000	251	1	0.272567	0.914482	0.349751	0.442376	0.958016	0.417337	0.513325	0.967294	0.342221	0.568147	1.20703	0.140931	0.549486		30.2447	23.7529	17.5485	17.8361	42.2133	36.037	25.4544	24.4183	25.1955	43.2573	36.883	30.2923	31.6421	41.1673	30.215	47.4823	37.0421
50S ribosomal protein L19	rplS rpl19 sll1740	P36239	RL19_SYNY3	translation [GO:0006412]	cytosolic large ribosomal subunit [GO:0022625]	structural constituent of ribosome [GO:0003735]	cytosolic large ribosomal subunit [GO:0022625];structural constituent of ribosome [GO:0003735];translation [GO:0006412]	122	9	9	9	50	13.786	0	118.4	23230000000	154	1	0.0777471	0.316101	0.700796	0.194216	0.493711	0.618217	0.255605	0.616292	0.51016	0.319047	1.12853	0.164471	0.496506		26.2257	12.886	25.9664	22.7017	32.3709	24.9818	19.8263	22.1663	23.341	32.9469	29.8981	18.2469	31.417	26.4451	27.8903	29.3872	28.9139
Transcription termination/antitermination protein NusG	nusG sll1742	P36265	NUSG_SYNY3	DNA-templated transcription, termination [GO:0006353];regulation of DNA-templated transcription, elongation [GO:0032784];regulation of transcription, DNA-templated [GO:0006355];transcription antitermination [GO:0031564]	cytosol [GO:0005829]		cytosol [GO:0005829];DNA-templated transcription, termination [GO:0006353];regulation of DNA-templated transcription, elongation [GO:0032784];regulation of transcription, DNA-templated [GO:0006355];transcription antitermination [GO:0031564]	205	15	15	15	62	23.416	0	323.31	6872100000	243	1	0.195647	1.04521	0.361307	0.318716	0.859607	0.504966	0.261945	1.39166	0.274269	0.488027	1.78989	0.076035	0.556746		3.0325	2.77086	2.93055	2.27494	3.81882	3.42524	2.91388	3.06756	3.35635	4.10127	3.24065	3.31861	3.12352	4.69989	4.08941	3.95593	3.15906
Phosphoribulokinase (PRK) (PRKase) (EC 2.7.1.19) (Phosphopentokinase)	prk ptk sll1525	P37101	KPPR_SYNY3	pyrimidine nucleobase metabolic process [GO:0006206];pyrimidine nucleoside salvage [GO:0043097];reductive pentose-phosphate cycle [GO:0019253]	cytosol [GO:0005829]	ATP binding [GO:0005524];phosphoribulokinase activity [GO:0008974];uridine kinase activity [GO:0004849]	ATP binding [GO:0005524];cytosol [GO:0005829];phosphoribulokinase activity [GO:0008974];pyrimidine nucleobase metabolic process [GO:0006206];pyrimidine nucleoside salvage [GO:0043097];reductive pentose-phosphate cycle [GO:0019253];uridine kinase activity [GO:0004849]	332	28	28	28	81.6	37.913	0	323.31	56424000000	714	1	0.0130871	0.0901303	0.938129	-0.0258038	0.233306	0.849211	0.0654455	0.551073	0.6765	0.121387	0.0297386	0.967859	0.0109259		18.3005	17.6603	24.0151	20.9827	24.3091	15.4626	21.2478	21.5811	28.431	20.5501	19.4484	19.0812	22.5612	20.3594	21.2382	19.0341	22.0804
Photosystem I reaction center subunit XI (PSI subunit V) (PSI-L)	psaL slr1655	P37277	PSAL_SYNY3	photosynthesis [GO:0015979]	integral component of membrane [GO:0016021];photosystem I reaction center [GO:0009538];plasma membrane-derived photosystem I [GO:0030094];thylakoid membrane [GO:0042651]		integral component of membrane [GO:0016021];photosynthesis [GO:0015979];photosystem I reaction center [GO:0009538];plasma membrane-derived photosystem I [GO:0030094];thylakoid membrane [GO:0042651]	157	6	6	6	45.2	16.624	0	252.83	115620000000	345	1	-0.284633	1.23996	0.254022	-0.636424	0.990816	0.420542	-0.417214	1.52727	0.261792	-0.572213	2.46646	0.0259474	-1.21757	+	542.587	371.839	452.186	391.924	322.427	427.686	351.198	340.897	433.231	193.793	358.265	329.487	355.319	206.104	146.931	288.318	275.803
All-trans-phytoene synthase (PSase) (EC 2.5.1.99)	crtB pys slr1255	P37294	CRTB_SYNY3	carotenoid biosynthetic process [GO:0016117];ergosterol biosynthetic process [GO:0006696]		farnesyl-diphosphate farnesyltransferase activity [GO:0004310];geranylgeranyl-diphosphate geranylgeranyltransferase activity [GO:0016767];metal ion binding [GO:0046872];squalene synthase activity [GO:0051996]	carotenoid biosynthetic process [GO:0016117];ergosterol biosynthetic process [GO:0006696];farnesyl-diphosphate farnesyltransferase activity [GO:0004310];geranylgeranyl-diphosphate geranylgeranyltransferase activity [GO:0016767];metal ion binding [GO:0046872];squalene synthase activity [GO:0051996]	337	8	8	8	18.1	38.707	0	119.33	517510000	119	1	0.307047	1.26277	0.257922	0.784356	1.08693	0.384736	0.721845	0.896649	0.344115	0.672447	1.22888	0.112942	0.727866		0.113276	0.156934	0.087043	0.0880416	0.217732	0.174792	0.158466	0.183836	0.0748316	0.225621	0.205881	0.141746	0.160581	0.340594	0.281653	0.233423	0.219637
Protein IcfG	icfG slr1860	P37979	ICFG_SYNY3		integral component of membrane [GO:0016021]	hydrolase activity [GO:0016787];signal transducer activity [GO:0004871]	hydrolase activity [GO:0016787];integral component of membrane [GO:0016021];signal transducer activity [GO:0004871]	634	2	2	2	3.8	70.961	0	3.8324	67423000	22	1	0.214087	0.0924429	0.916678	-0.0679789	0.913648	0.446533	-0.376258	0.239804	0.77812	-0.1511	1.19497	0.180912	-0.393036		0.027493	0.0206078	0.0183087	0.0227661	0.0226135	0.0442342	0.0280092	0.0197637	0.0287856	0.015911		0.0389827	0.0240349	0.018222	0.0176939		0.0153172
Protein translocase subunit SecE	secE ssl3335	P38382	SECE_SYNY3	protein secretion [GO:0009306];protein targeting [GO:0006605]	integral component of membrane [GO:0016021];plasma membrane [GO:0005886];thylakoid membrane [GO:0042651]	P-P-bond-hydrolysis-driven protein transmembrane transporter activity [GO:0015450]	integral component of membrane [GO:0016021];plasma membrane [GO:0005886];P-P-bond-hydrolysis-driven protein transmembrane transporter activity [GO:0015450];protein secretion [GO:0009306];protein targeting [GO:0006605];thylakoid membrane [GO:0042651]	81	3	3	3	39.5	9.1335	0	323.31	1785700000	69	1	0.822087	0.727832	0.374422	0.607296	3.18531	0.792	1.11721	0.803661	0.376016	0.610747	0.571486	0.381858	0.458986		3.36804	6.33715	3.21378	2.85884	3.22864	6.4868	5.45146	8.24314	3.7012	10.1364	7.88485	2.67415	3.33658	8.98131	8.22145	7.2537	8.05952
Uncharacterized methyltransferase sll1242 (EC 2.1.1.-) (ORF N)	sll1242	P42349	Y1242_SYNY3			4 iron, 4 sulfur cluster binding [GO:0051539];cobalamin binding [GO:0031419];metal ion binding [GO:0046872];methyltransferase activity [GO:0008168]	4 iron, 4 sulfur cluster binding [GO:0051539];cobalamin binding [GO:0031419];metal ion binding [GO:0046872];methyltransferase activity [GO:0008168]	536	19	19	19	44.4	61.755	0	90.816	2041200000	176	1	0.121827	0.792822	0.35706	0.593036	0.588376	0.526044	0.453745	1.24478	0.265831	0.986907	2.11247	0.031584	1.21165	+	0.221259	0.309248	0.324473	0.342607	0.513141	0.388398	0.38642	0.356455	0.169822	0.65532	0.427763	0.322412	0.302556	0.78907	0.925749	0.808499	0.468459
Uncharacterized protein slr1353	slr1353	P42350	Y1353_SYNY3					291	2	2	2	5.5	31.283	0.0010764	2.4567	367140000	8	1	0.206967	0.271663	0.723458	0.208576	0.132419	0.853906	-0.185915	0.273659	0.735179	0.197607	0.827955	0.247437	0.497326		0.384941	0.260045	0.338933	0.125402	0.256091	0.246662	0.231702	0.261303	0.452062	0.330672	0.40103	0.204345	0.287209	0.326335	0.292274	0.350799	0.0649194
50S ribosomal protein L9	rplI rpl9 sll1244	P42352	RL9_SYNY3	translation [GO:0006412]	cytosolic large ribosomal subunit [GO:0022625]	RNA binding [GO:0003723];rRNA binding [GO:0019843];structural constituent of ribosome [GO:0003735]	cytosolic large ribosomal subunit [GO:0022625];RNA binding [GO:0003723];rRNA binding [GO:0019843];structural constituent of ribosome [GO:0003735];translation [GO:0006412]	152	17	17	17	91.4	16.641	0	323.31	36420000000	442	1	0.168227	0.781893	0.451103	0.262796	0.686177	0.529963	0.295745	0.963693	0.377105	0.390147	1.61975	0.10822	0.448186		28.9805	24.7513	30.5409	25.7237	43.6747	36.0545	28.4931	27.1333	37.4188	42.2732	37.718	30.0497	32.2957	42.3246	39.4976	46.2063	37.3437
UDP-N-acetylmuramoyl-tripeptide--D-alanyl-D-alanine ligase (EC 6.3.2.10) (D-alanyl-D-alanine-adding enzyme) (UDP-MurNAc-pentapeptide synthetase)	murF slr1351	P45450	MURF_SYNY3	cell cycle [GO:0007049];cell division [GO:0051301];cell wall organization [GO:0071555];peptidoglycan biosynthetic process [GO:0009252];regulation of cell shape [GO:0008360]	cytoplasm [GO:0005737]	ATP binding [GO:0005524];UDP-N-acetylmuramoyl-tripeptide-D-alanyl-D-alanine ligase activity [GO:0047480]	ATP binding [GO:0005524];cell cycle [GO:0007049];cell division [GO:0051301];cell wall organization [GO:0071555];cytoplasm [GO:0005737];peptidoglycan biosynthetic process [GO:0009252];regulation of cell shape [GO:0008360];UDP-N-acetylmuramoyl-tripeptide-D-alanyl-D-alanine ligase activity [GO:0047480]	454	12	12	12	32.2	48.297	0	168.76	2836400000	195	1	0.011887	0.52435	0.525973	0.326536	0.924202	0.430427	0.416145	1.06666	0.330278	0.554347	1.36026	0.106712	0.616806		0.658342	0.787873	0.603436	0.931888	1.38966	0.762499	0.70351	0.952303	0.799734	1.03388	0.799064	0.810834	0.909201	1.58659	1.3448	1.08645	1.03756
Imidazoleglycerol-phosphate dehydratase (IGPD) (EC 4.2.1.19)	hisB slr0500	P48054	HIS7_SYNY3	histidine biosynthetic process [GO:0000105]	cytoplasm [GO:0005737]	imidazoleglycerol-phosphate dehydratase activity [GO:0004424]	cytoplasm [GO:0005737];histidine biosynthetic process [GO:0000105];imidazoleglycerol-phosphate dehydratase activity [GO:0004424]	210	2	2	2	11.4	23.063	0.0010881	2.6942	454990000	19	1	0.337107	0.00943888	0.991554	-0.0135238	0.606487	0.520915	0.444705	0.107995	0.863539	-0.241573	0.10011	0.840367	-0.195214		0.420305	0.243203	0.230138	0.321063	0.626474	0.475596	0.327132	0.300324	0.516733	0.63037	0.457195	0.326302	0.48551	0.538316	0.115799	0.566292	0.422755
2-isopropylmalate synthase (EC 2.3.3.13) (Alpha-IPM synthase) (Alpha-isopropylmalate synthase)	leuA slr0186	P48576	LEU1_SYNY3	leucine biosynthetic process [GO:0009098]		2-isopropylmalate synthase activity [GO:0003852]	2-isopropylmalate synthase activity [GO:0003852];leucine biosynthetic process [GO:0009098]	533	26	26	26	68.1	57.413	0	323.31	7298800000	513	1	0.590367	3.0606	0.236	0.922116	1.81159	0.388549	0.749805	1.99595	0.265704	0.746327	3.18122	0.0265532	0.869606	+	0.967015	1.07172	1.04107	1.11964	1.64641	1.81291	1.63257	1.49101	1.58457	2.20071	2.47492	1.97764	1.64966	2.53331	2.37544	2.70761	2.11432
30S ribosomal protein S4	rpsD rps4 slr0469	P48939	RS4_SYNY3	positive regulation of translational fidelity [GO:0045903];translation [GO:0006412]	small ribosomal subunit [GO:0015935]	rRNA binding [GO:0019843];structural constituent of ribosome [GO:0003735]	positive regulation of translational fidelity [GO:0045903];rRNA binding [GO:0019843];small ribosomal subunit [GO:0015935];structural constituent of ribosome [GO:0003735];translation [GO:0006412]	202	16	16	16	54.5	23.183	0	323.31	53362000000	331	1	0.248387	1.05122	0.316	0.447556	0.621127	0.531751	0.361765	1.07292	0.335727	0.518327	0.944376	0.221053	0.460266		27.7422	18.9882	25.8514	20.3256	44.5863	35.3566	22.4967	24.5626	36.3099	41.1457	36.7706	29.2584	35.7401	40.6794	37.2145	45.7347	26.1601
30S ribosomal protein S14	rpsN rps14 slr0628	P48944	RS14_SYNY3	translation [GO:0006412]	small ribosomal subunit [GO:0015935]	rRNA binding [GO:0019843];structural constituent of ribosome [GO:0003735]	rRNA binding [GO:0019843];small ribosomal subunit [GO:0015935];structural constituent of ribosome [GO:0003735];translation [GO:0006412]	100	6	6	6	46	11.854	0	117.3	7839500000	80	1	0.0363069	0.0620809	0.93686	0.0503159	0.16036	0.843623	-0.134455	0.369395	0.652533	0.267307	1.00047	0.184824	0.533826		25.4538	13.5351	27.9654	24.0644	37.6148	22.9514	16.4184	23.5343	34.756	32.0882	22.7687	18.3509	35.9264	28.7308	24.0738	25.5494	14.7751
30S ribosomal protein S18	rpsR rps18 ssr1399	P48946	RS18_SYNY3	translation [GO:0006412]	cytosolic small ribosomal subunit [GO:0022627]	rRNA binding [GO:0019843];structural constituent of ribosome [GO:0003735]	cytosolic small ribosomal subunit [GO:0022627];rRNA binding [GO:0019843];structural constituent of ribosome [GO:0003735];translation [GO:0006412]	71	13	13	13	71.8	8.3808	0	74.022	20325000000	301	1	0.142207	1.17431	0.309142	0.383596	0.67472	0.532063	0.311925	1.00282	0.353586	0.456607	1.14821	0.14634	0.573646		30.6223	25.9495	26.2741	21.1609	35.6524	30.8438	26.219	24.5286	27.1465	47.884	39.1973	31.9441	27.0709	45.4191	38.6633	47.5119	32.863
30S ribosomal protein S21	rpsU rps21 ssl0601	P48949	RS21_SYNY3	translation [GO:0006412]	ribosomal subunit [GO:0044391]	structural constituent of ribosome [GO:0003735]	ribosomal subunit [GO:0044391];structural constituent of ribosome [GO:0003735];translation [GO:0006412]	60	5	5	5	60	7.3414	0	323.31	10435000000	186	1	0.527347	0.920451	0.31846	0.585396	0.499239	0.562692	0.422965	0.951417	0.340642	0.642807	1.34945	0.0889309	0.849106		8.04008	13.5821	20.5017	16.5588	30.9599	26.1295	17.4886	15.7884	26.2036	37.757	26.329	19.5443	22.7591	28.8106	25.8697	30.3519	14.3621
50S ribosomal protein L20	rplT rpl20 sll0767	P48957	RL20_SYNY3	ribosomal large subunit assembly [GO:0000027];translation [GO:0006412]	cytosolic large ribosomal subunit [GO:0022625]	rRNA binding [GO:0019843];structural constituent of ribosome [GO:0003735]	cytosolic large ribosomal subunit [GO:0022625];ribosomal large subunit assembly [GO:0000027];rRNA binding [GO:0019843];structural constituent of ribosome [GO:0003735];translation [GO:0006412]	117	7	7	7	28.2	13.553	0	96.442	7130700000	143	1	0.235647	1.20058	0.260915	0.616476	0.373628	0.669938	0.270165	0.728671	0.428759	0.448107	1.61843	0.0673355	0.813186		10.0548	6.72081	9.20024	6.08994	17.3772	14.3066	9.84126	9.54532	12.6143	8.78274	16.3122	12.3615	12.4612	12.852	17.2568	13.665	8.11108
50S ribosomal protein L33	rpmG rpl33 ssr1398	P48958	RL33_SYNY3	translation [GO:0006412]	ribosome [GO:0005840]	structural constituent of ribosome [GO:0003735]	ribosome [GO:0005840];structural constituent of ribosome [GO:0003735];translation [GO:0006412]	65	2	2	2	26.2	7.5487	0	52.888	2821600000	36	1	-0.883646	0.0658727	0.920134	0.263776	0.814429	0.399302	1.53869	0.0821278	0.893401	0.313987	0.792166	0.179078	1.48821		0.304795	8.08605	6.57947	6.17324	12.0974		9.04326	7.84674	7.92709	16.773	10.8587	0.258078	7.29431	14.3276	10.3151	16.8563	11.0693
50S ribosomal protein L35	rpmI rpl35 ssl1426	P48959	RL35_SYNY3	translation [GO:0006412]	cytosolic large ribosomal subunit [GO:0022625]	structural constituent of ribosome [GO:0003735]	cytosolic large ribosomal subunit [GO:0022625];structural constituent of ribosome [GO:0003735];translation [GO:0006412]	67	3	3	3	34.3	7.8913	0	66.61	807880000	21	1	0.114347	0.0591269	0.931215	0.0834562	0.632835	0.504163	0.471645	0.271335	0.708343	0.342487	1.95672	0.0403864	1.01997	+	1.08418	1.60941	2.19037	2.04646	3.20656	0.808998	1.77515	2.55512	3.08868	3.28905	1.36565	1.98946	4.40295	0.833195	3.36031	1.52015	3.00881
GMP synthase [glutamine-hydrolyzing] (EC 6.3.5.2) (GMP synthetase) (Glutamine amidotransferase)	guaA slr0213	P49057	GUAA_SYNY3	glutamine metabolic process [GO:0006541];GMP biosynthetic process [GO:0006177]		ATP binding [GO:0005524];GMP synthase (glutamine-hydrolyzing) activity [GO:0003922];GMP synthase activity [GO:0003921];pyrophosphatase activity [GO:0016462]	ATP binding [GO:0005524];glutamine metabolic process [GO:0006541];GMP biosynthetic process [GO:0006177];GMP synthase (glutamine-hydrolyzing) activity [GO:0003922];GMP synthase activity [GO:0003921];pyrophosphatase activity [GO:0016462]	542	28	28	28	53.1	61.008	0	323.31	9449500000	437	1	0.213667	1.22352	0.274454	0.513516	0.997015	0.419468	0.478705	1.58929	0.250179	0.648907	2.30124	0.0365217	0.774206	+	1.79404	1.79158	1.57743	1.64585	3.17626	2.27822	1.9769	1.99238	1.88021	3.2943	2.47904	2.16277	2.40522	3.37392	3.61124	3.38139	2.73605
Glyceraldehyde-3-phosphate dehydrogenase 1 (GAPDH 1) (EC 1.2.1.12) (NAD-dependent glyceraldehyde-3-phosphate dehydrogenase)	gap1 slr0884	P49433	G3P1_SYNY3	glucose metabolic process [GO:0006006];glycolytic process [GO:0006096]	cytoplasm [GO:0005737]	glyceraldehyde-3-phosphate dehydrogenase (NAD+) (phosphorylating) activity [GO:0004365];NAD binding [GO:0051287];NADP binding [GO:0050661]	cytoplasm [GO:0005737];glucose metabolic process [GO:0006006];glyceraldehyde-3-phosphate dehydrogenase (NAD+) (phosphorylating) activity [GO:0004365];glycolytic process [GO:0006096];NAD binding [GO:0051287];NADP binding [GO:0050661]	339	16	16	16	55.2	36.146	0	323.31	4734900000	254	1	0.286487	2.27488	0.193778	0.498156	1.18557	0.409006	0.412805	1.68872	0.250642	0.545787	1.44084	0.0983679	0.621866		1.34836	1.36267	1.55539	1.13416	1.63063	1.6915	1.4174	1.35952	1.80237	2.42817	1.97203	1.73361	1.88632	1.8258	2.52309	2.16943	2.08045
DnAJ-like protein slr0093	slr0093	P50027	DNAJH_SYNY3	protein folding [GO:0006457]		unfolded protein binding [GO:0051082]	protein folding [GO:0006457];unfolded protein binding [GO:0051082]	332	5	5	5	17.8	36.365	0	10.092	788340000	55	1	0.167407	0.235628	0.812932	0.0815162	0.449635	0.67189	-0.178035	0.144739	0.871812	-0.073893	0.24298	0.75889	0.0879458		0.658114	0.385909	0.597318	0.464654	0.474055	0.592467	0.528268	0.55386	0.57762	0.59616	0.56923	0.493793	0.525248	0.550504	0.545365	0.359065	0.525475
Magnesium-chelatase subunit ChlI (EC 6.6.1.1) (Mg-protoporphyrin IX chelatase)	chlI slr1030	P51634	CHLI_SYNY3	chlorophyll biosynthetic process [GO:0015995];photosynthesis [GO:0015979]		ATP binding [GO:0005524];magnesium chelatase activity [GO:0016851]	ATP binding [GO:0005524];chlorophyll biosynthetic process [GO:0015995];magnesium chelatase activity [GO:0016851];photosynthesis [GO:0015979]	357	27	27	27	71.1	39.463	0	323.31	29061000000	466	1	0.097947	0.368662	0.667398	0.195516	0.545739	0.606967	0.231565	0.485089	0.623881	0.209807	0.156081	0.814018	0.0813058		12.078	10.3706	7.93798	9.50528	8.92175	13.1867	10.1559	10.7457	11.5098	7.14816	14.5352	11.7312	11.2081	13.6386	6.37	13.3532	13.9442
Pyridoxal phosphate homeostasis protein (PLP homeostasis protein)	slr0556	P52056	PLPHP_SYNY3		intracellular [GO:0005622]	pyridoxal phosphate binding [GO:0030170]	intracellular [GO:0005622];pyridoxal phosphate binding [GO:0030170]	218	4	4	4	30.7	24.038	0	9.5342	150070000	13	1	0.167007	0.0311425	0.96262	0.0692561	0.306112	0.675527	0.484145	0.308738	0.658522	0.477707	0.100835	0.841871	-0.173434		0.140224	0.15939	0.115173	0.0154991	0.0522084	0.123759	0.139849	0.145712	0.0792905	0.0185823	0.129004	0.153901	0.0964264	0.0478388	0.0289136	0.13752	0.140495
6-phosphogluconate dehydrogenase, decarboxylating (EC 1.1.1.44)	gnd sll0329	P52208	6PGD_SYNY3	D-gluconate metabolic process [GO:0019521];pentose-phosphate shunt [GO:0006098]		phosphogluconate dehydrogenase (decarboxylating) activity [GO:0004616]	D-gluconate metabolic process [GO:0019521];pentose-phosphate shunt [GO:0006098];phosphogluconate dehydrogenase (decarboxylating) activity [GO:0004616]	482	28	28	28	66.6	52.873	0	323.31	30713000000	659	1	-0.139253	0.710195	0.486389	-0.248364	0.880476	0.469404	-0.321395	0.541477	0.601896	-0.206573	0.470418	0.570382	-0.163934		14.0151	11.6854	13.7606	13.2216	8.12984	10.6435	11.3313	12.0269	11.2667	9.14809	9.27909	10.8828	11.3284	7.98685	11.2106	8.58202	9.49583
Thioredoxin (Trx)	trxA slr0623	P52231	THIO_SYNY3	cell redox homeostasis [GO:0045454];cellular response to oxidative stress [GO:0034599];glycerol ether metabolic process [GO:0006662]	cytoplasm [GO:0005737]	oxidoreductase activity, acting on a sulfur group of donors, disulfide as acceptor [GO:0016671];protein disulfide oxidoreductase activity [GO:0015035];protein-disulfide reductase activity [GO:0047134];thioredoxin-disulfide reductase activity [GO:0004791]	cell redox homeostasis [GO:0045454];cellular response to oxidative stress [GO:0034599];cytoplasm [GO:0005737];glycerol ether metabolic process [GO:0006662];oxidoreductase activity, acting on a sulfur group of donors, disulfide as acceptor [GO:0016671];protein disulfide oxidoreductase activity [GO:0015035];protein-disulfide reductase activity [GO:0047134];thioredoxin-disulfide reductase activity […	107	11	11	11	99.1	11.748	0	323.31	26657000000	317	1	-0.117493	1.06876	0.320539	-0.405904	0.663943	0.532609	-0.301815	0.530098	0.591253	-0.229053	1.54491	0.0930251	-0.588094		43.6893	29.8826	45.1099	33.8323	24.0077	34.4399	28.783	30.9313	46.1799	22.4831	27.4528	28.7936	32.0304	20.7743	22.2756	30.1131	25.5685
Asparagine--tRNA ligase (EC 6.1.1.22) (Asparaginyl-tRNA synthetase) (AsnRS)	asnS sll0495	P52276	SYN_SYNY3	asparaginyl-tRNA aminoacylation [GO:0006421]	cytoplasm [GO:0005737]	asparagine-tRNA ligase activity [GO:0004816];ATP binding [GO:0005524];nucleic acid binding [GO:0003676]	asparagine-tRNA ligase activity [GO:0004816];asparaginyl-tRNA aminoacylation [GO:0006421];ATP binding [GO:0005524];cytoplasm [GO:0005737];nucleic acid binding [GO:0003676]	462	19	19	19	41.6	52.698	0	140.59	4460400000	209	1	0.193047	0.0425014	0.963587	0.0164161	0.288527	0.786857	0.109905	0.3863	0.72644	0.128427	0.0424232	0.947493	0.0233457		1.41148	1.10806	0.952091	0.84876	1.26044	1.38964	1.04199	1.41362	1.19897	1.26731	1.10971	1.06827	1.08799	1.20083	1.08877	1.28042	1.14861
Glucose-1-phosphate adenylyltransferase (EC 2.7.7.27) (ADP-glucose pyrophosphorylase) (ADPGlc PPase) (ADP-glucose synthase)	glgC agp slr1176	P52415	GLGC_SYNY3	glycogen biosynthetic process [GO:0005978]		ATP binding [GO:0005524];glucose-1-phosphate adenylyltransferase activity [GO:0008878]	ATP binding [GO:0005524];glucose-1-phosphate adenylyltransferase activity [GO:0008878];glycogen biosynthetic process [GO:0005978]	439	45	45	45	81.5	49.366	0	323.31	37721000000	964	1	0.0026669	1.32852	0.529335	-0.127024	0.181746	0.89574	-0.0416147	0.21531	0.9026	-0.0298332	0.444414	0.770704	-0.0509943		9.27733	9.70033	10.681	11.1868	9.531	10.7057	9.40249	11.1788	10.8995	8.43373	9.07617	9.08621	9.24435	9.59396	9.02228	9.28896	8.42335
UPF0758 protein sll0766	sll0766	P52601	Y766_SYNY3			metal ion binding [GO:0046872];metallopeptidase activity [GO:0008237]	metal ion binding [GO:0046872];metallopeptidase activity [GO:0008237]	243	3	3	3	20.6	26.973	0	8.6603	89062000	31	1	0.657568	0.617603	0.379967	1.20021	0.637319	0.451002	1.16216	0.561586	0.441323	1.0484	0.671824	0.240737	1.32294			0.10792	0.00352264	0.0257003	0.0503392		0.0874222	0.10182	0.0262669	0.0368874	0.0306511	0.0897639	0.0295822	0.0408173	0.137442	0.0484257	0.0998353
RutC family protein slr0709	slr0709	P52761	Y709_SYNY3					130	5	5	5	53.1	13.834	0	101.62	283750000	69	1	0.764947	1.07914	0.253008	1.04438	1.25974	0.403255	1.16973	1.09203	0.269798	1.02399	0.348952	0.526061	0.520566		0.0861628	0.50773	0.215248	0.239439	0.545075	0.286858	0.466239	0.491306	0.501907	0.528022	0.355343	0.741582	0.419043	0.71046	0.584629	0.65789	0.383472
GDT1-like protein sll0615	sll0615	P52876	Y615_SYNY3		integral component of membrane [GO:0016021];plasma membrane [GO:0005886]		integral component of membrane [GO:0016021];plasma membrane [GO:0005886]	206	2	2	2	13.1	22.38	0	4.3685	82227000	5	1	0.822128	1.69949	0.196842	2.23673	0.749256	0.415384	1.55296	0.869999	0.3053	1.81138	1.94417	0.0261509	2.56712	+		0.0489019			0.0436198	0.0497523		0.0493568		0.0570737	0.164674	0.0443777	0.0519898	0.0487426	0.133711	0.244129	0.0607528
Putative pyruvate-flavodoxin oxidoreductase (EC 1.2.7.-)	nifJ sll0741	P52965	NIFJ_SYNY3	electron transport chain [GO:0022900];nitrogen fixation [GO:0009399];response to oxidative stress [GO:0006979]		4 iron, 4 sulfur cluster binding [GO:0051539];iron ion binding [GO:0005506];oxidoreductase activity [GO:0016491];oxidoreductase activity, acting on the aldehyde or oxo group of donors [GO:0016903];thiamine pyrophosphate binding [GO:0030976]	4 iron, 4 sulfur cluster binding [GO:0051539];electron transport chain [GO:0022900];iron ion binding [GO:0005506];nitrogen fixation [GO:0009399];oxidoreductase activity [GO:0016491];oxidoreductase activity, acting on the aldehyde or oxo group of donors [GO:0016903];response to oxidative stress [GO:0006979];thiamine pyrophosphate binding [GO:0030976]	1199	6	6	6	7.4	131.46	0	6.3813	168220000	18	1	0.354687	0.277212	0.652827	0.719616	0.133813	0.844675	0.288645	0.158018	0.810182	0.336507	0.472089	0.401724	0.807786		0.0345807	0.0281647	0.0359235	0.00402925	0.00331156	0.0305498	0.0182071	0.0146779	0.0408107	0.0047901	0.0159553	0.0293882	0.029759	0.103044	0.00393176	0.016547	0.0090944
1,4-alpha-glucan branching enzyme GlgB (EC 2.4.1.18) (1,4-alpha-D-glucan:1,4-alpha-D-glucan 6-glucosyl-transferase) (Alpha-(1->4)-glucan branching enzyme) (Glycogen branching enzyme) (BE)	glgB sll0158	P52981	GLGB_SYNY3	glycogen biosynthetic process [GO:0005978]		1,4-alpha-glucan branching enzyme activity (using a glucosylated glycogenin as primer for glycogen synthesis) [GO:0102752];1,4-alpha-glucan branching enzyme activity [GO:0003844];cation binding [GO:0043169];hydrolase activity, hydrolyzing O-glycosyl compounds [GO:0004553]	1,4-alpha-glucan branching enzyme activity (using a glucosylated glycogenin as primer for glycogen synthesis) [GO:0102752];1,4-alpha-glucan branching enzyme activity [GO:0003844];cation binding [GO:0043169];glycogen biosynthetic process [GO:0005978];hydrolase activity, hydrolyzing O-glycosyl compounds [GO:0004553]	770	17	17	17	26.2	89.526	0	308.75	12135000000	371	1	0.00504701	0.0102008	0.993339	0.00363615	0.11251	0.916489	-0.0394946	0.173954	0.862987	0.0626469	0.125506	0.876315	0.0393857		2.12198	2.71459	2.06977	2.49239	3.08555	2.97462	2.62305	2.37264	2.42821	2.07566	2.45357	2.54238	2.1499	2.63906	2.6235	2.57633	2.11652
Glucose-6-phosphate isomerase (GPI) (EC 5.3.1.9) (Phosphoglucose isomerase) (PGI) (Phosphohexose isomerase) (PHI)	pgi slr1349	P52983	G6PI_SYNY3	gluconeogenesis [GO:0006094];glycolytic process [GO:0006096]	cytoplasm [GO:0005737]	glucose-6-phosphate isomerase activity [GO:0004347]	cytoplasm [GO:0005737];gluconeogenesis [GO:0006094];glucose-6-phosphate isomerase activity [GO:0004347];glycolytic process [GO:0006096]	531	27	27	27	60.8	58.356	0	323.31	12969000000	388	1	-0.017853	0.508225	0.74391	-0.0813638	0.0780652	0.945843	0.0192054	0.58783	0.711649	0.096187	0.185865	0.862228	0.0366858		3.31799	3.02437	2.55615	3.09476	3.09712	3.27389	2.67278	3.10888	2.96677	2.86348	2.89845	2.55882	2.87223	2.85665	3.04743	2.85129	3.06671
Homoserine dehydrogenase (HDH) (EC 1.1.1.3)	hom sll0455	P52986	DHOM_SYNY3	isoleucine biosynthetic process [GO:0009097];methionine biosynthetic process [GO:0009086];threonine biosynthetic process [GO:0009088]		homoserine dehydrogenase activity [GO:0004412];NADP binding [GO:0050661]	homoserine dehydrogenase activity [GO:0004412];isoleucine biosynthetic process [GO:0009097];methionine biosynthetic process [GO:0009086];NADP binding [GO:0050661];threonine biosynthetic process [GO:0009088]	433	13	13	13	30.7	45.486	0	323.31	3112400000	256	1	0.239607	1.1366	0.356287	0.305376	0.602138	0.577172	0.244645	0.575023	0.593805	0.199107	0.169969	0.830363	0.0592858		1.41599	1.8147	1.20595	1.14475	1.37643	1.78473	1.94847	1.33366	1.41068	1.71222	1.69805	1.76587	1.39192	2.06942	1.62901	1.86118	2.21038
Iron-sulfur cluster carrier protein	mrp slr0067	P53383	APBC_SYNY3			ATP binding [GO:0005524];hydrolase activity [GO:0016787];iron-sulfur cluster binding [GO:0051536];metal ion binding [GO:0046872]	ATP binding [GO:0005524];hydrolase activity [GO:0016787];iron-sulfur cluster binding [GO:0051536];metal ion binding [GO:0046872]	353	16	16	16	53.8	37.131	0	214.22	5820700000	299	1	0.00618696	0.801608	0.550782	0.159096	0.572449	0.713557	0.0994254	0.790416	0.569068	0.167247	1.98116	0.177957	0.243386		2.34325	1.84642	2.44829	2.35713	2.23865	2.55852	1.80606	2.28183	2.03086	2.66691	2.53763	2.21572	2.23143	2.79031	2.77117	2.41031	2.16504
Methionine aminopeptidase A (MAP A) (MetAP A) (EC 3.4.11.18) (Peptidase M)	slr0918	P53579	MAP11_SYNY3			aminopeptidase activity [GO:0004177];metal ion binding [GO:0046872];metalloexopeptidase activity [GO:0008235]	aminopeptidase activity [GO:0004177];metal ion binding [GO:0046872];metalloexopeptidase activity [GO:0008235]	253	6	6	6	32.4	27.235	0	45.369	798510000	63	1	0.104267	0.532871	0.531742	0.302136	0.315763	0.7068	0.227465	0.654017	0.45428	0.462127	1.13824	0.138271	0.649526		0.450784	0.288498	0.277714	0.282815	0.665461	0.389368	0.34485	0.320655	0.39229	0.577611	0.396662	0.409938	0.463446	0.58363	0.440371	0.579234	0.457136
Ribonuclease J (RNase J) (EC 3.1.-.-)	rnj slr0551	P54123	RNJ_SYNY3	rRNA processing [GO:0006364]	cytoplasm [GO:0005737]	5'-3' exoribonuclease activity [GO:0004534];endoribonuclease activity [GO:0004521];RNA binding [GO:0003723];zinc ion binding [GO:0008270]	5'-3' exoribonuclease activity [GO:0004534];cytoplasm [GO:0005737];endoribonuclease activity [GO:0004521];RNA binding [GO:0003723];rRNA processing [GO:0006364];zinc ion binding [GO:0008270]	640	31	31	31	62.5	70.426	0	323.31	16727000000	595	1	0.525807	2.15433	0.210839	0.969276	1.42632	0.409608	0.794625	2.06029	0.292857	0.965167	2.99612	0.0211765	1.28697	+	1.4292	1.38025	1.88619	1.46047	2.9441	1.93899	2.61107	2.45325	1.78719	4.45854	2.68791	2.67563	3.17812	4.05704	4.96328	3.69229	3.52811
Putative ammonium transporter sll0108	sll0108	P54147	Y108_SYNY3		integral component of membrane [GO:0016021];plasma membrane [GO:0005886]	ammonium transmembrane transporter activity [GO:0008519]	ammonium transmembrane transporter activity [GO:0008519];integral component of membrane [GO:0016021];plasma membrane [GO:0005886]	507	3	3	3	9.7	53.58	0	32.982	3963900000	70	1	0.332967	1.3069	0.251532	0.675176	1.67243	0.404254	0.751305	1.04512	0.325444	0.600827	0.0935202	0.87428	0.0701657		2.54155	4.37728	3.357	4.451	6.91211	6.22558	7.1619	5.7837	3.14485	4.49235	6.98124	7.29991	6.14142	8.71757	4.3717	7.62807	7.97339
Ribulose bisphosphate carboxylase large chain (RuBisCO large subunit) (EC 4.1.1.39)	cbbL rbcL slr0009	P54205	RBL_SYNY3	photorespiration [GO:0009853];reductive pentose-phosphate cycle [GO:0019253]		magnesium ion binding [GO:0000287];monooxygenase activity [GO:0004497];ribulose-bisphosphate carboxylase activity [GO:0016984]	magnesium ion binding [GO:0000287];monooxygenase activity [GO:0004497];photorespiration [GO:0009853];reductive pentose-phosphate cycle [GO:0019253];ribulose-bisphosphate carboxylase activity [GO:0016984]	470	47	47	47	71.9	52.49	0	323.31	565220000000	1919	1	0.113467	0.321252	0.755815	0.106516	1.32013	0.420133	0.286585	1.23017	0.375682	0.286747	0.154975	0.848394	0.0512457		127.205	175.903	142.574	156.718	200.357	176.657	167.561	171.171	153.234	191.178	168.626	173.018	165.166	208.72	144.067	192.447	199.507
Ribulose bisphosphate carboxylase small chain (RuBisCO small subunit) (EC 4.1.1.39)	cbbS rbcS slr0012	P54206	RBS_SYNY3	reductive pentose-phosphate cycle [GO:0019253]		monooxygenase activity [GO:0004497];ribulose-bisphosphate carboxylase activity [GO:0016984]	monooxygenase activity [GO:0004497];reductive pentose-phosphate cycle [GO:0019253];ribulose-bisphosphate carboxylase activity [GO:0016984]	113	11	11	11	72.6	13.239	0	323.31	210630000000	584	1	-0.0442329	0.292552	0.799185	-0.0749237	0.176184	0.898662	0.0382054	0.250076	0.855237	0.0493471	1.41443	0.342469	-0.170914		253.073	250.964	254.526	250.268	303.831	274.68	240.392	235.012	278.956	243.6	264.419	271.928	244.192	277.959	194.266	304.546	294.147
Uroporphyrinogen decarboxylase (UPD) (URO-D) (EC 4.1.1.37)	hemE slr0536	P54224	DCUP_SYNY3	heme biosynthetic process [GO:0006783];protoporphyrinogen IX biosynthetic process [GO:0006782]	cytosol [GO:0005829]	uroporphyrinogen decarboxylase activity [GO:0004853]	cytosol [GO:0005829];heme biosynthetic process [GO:0006783];protoporphyrinogen IX biosynthetic process [GO:0006782];uroporphyrinogen decarboxylase activity [GO:0004853]	350	21	21	21	72	39.152	0	323.31	27085000000	449	1	0.109087	0.828212	0.451556	0.244416	0.88147	0.48198	0.284325	0.753698	0.520318	0.220567	0.347612	0.684443	0.117386		13.034	12.4609	11.2533	11.8214	19.1441	16.7711	12.599	13.2672	14.3631	14.9925	16.6354	15.122	15.1987	18.2791	13.8067	17.8768	16.4532
Ferrochelatase (EC 4.99.1.1) (Heme synthase) (Protoheme ferro-lyase)	hemH slr0839	P54225	HEMH_SYNY3	heme biosynthetic process [GO:0006783]	cytoplasm [GO:0005737]	ferrochelatase activity [GO:0004325];metal ion binding [GO:0046872]	cytoplasm [GO:0005737];ferrochelatase activity [GO:0004325];heme biosynthetic process [GO:0006783];metal ion binding [GO:0046872]	387	11	11	11	39.5	43.924	0	323.31	2865900000	198	1	-0.00289301	0.182982	0.86442	-0.0650039	0.00172151	0.998805	0.000625336	0.49018	0.685047	-0.126653	0.679166	0.508526	-0.154374		1.19541	1.63278	1.47159	1.60918	1.25617	1.64013	1.37206	1.84203	1.13642	1.22025	1.21368	1.60835	1.12535	1.61802	1.30404	1.34912	1.42612
Aminomethyltransferase (EC 2.1.2.10) (Glycine cleavage system T protein)	gcvT sll0171	P54261	GCST_SYNY3	glycine catabolic process [GO:0006546]		aminomethyltransferase activity [GO:0004047];transaminase activity [GO:0008483]	aminomethyltransferase activity [GO:0004047];glycine catabolic process [GO:0006546];transaminase activity [GO:0008483]	372	10	10	10	29.3	41.036	0	52.478	1157400000	55	1	-0.265993	1.00223	0.308421	-0.509444	0.654194	0.469046	-0.619255	0.372827	0.661751	-0.233933	0.976069	0.20036	-0.499174		0.610943	0.436041	0.967056	0.473301	0.410948	0.470839	0.478783	0.302015	0.803735	0.364242	0.450745	0.278216	0.321607	0.461539	0.460538	0.449321	0.465223
3-isopropylmalate dehydratase large subunit (EC 4.2.1.33) (Alpha-IPM isomerase) (IPMI) (Isopropylmalate isomerase)	leuC sll1470	P54384	LEUC_SYNY3	leucine biosynthetic process [GO:0009098]		3-isopropylmalate dehydratase activity [GO:0003861];4 iron, 4 sulfur cluster binding [GO:0051539];metal ion binding [GO:0046872]	3-isopropylmalate dehydratase activity [GO:0003861];4 iron, 4 sulfur cluster binding [GO:0051539];leucine biosynthetic process [GO:0009098];metal ion binding [GO:0046872]	468	19	19	19	53.6	50.458	0	251.76	4674200000	284	1	0.042407	0.584651	0.546598	0.233616	0.106112	0.903734	0.0621254	0.25293	0.77795	0.133607	0.129281	0.837506	-0.0835942		1.2706	1.74913	1.20905	1.68194	2.30302	2.13466	1.70025	1.8636	1.12412	1.58565	1.82359	1.97668	1.64863	2.34539	1.67806	1.95696	1.53495
NADP-specific glutamate dehydrogenase (NADP-GDH) (EC 1.4.1.4)	gdhA slr0710	P54386	DHE4_SYNY3	glutamate biosynthetic process [GO:0006537]	cytoplasm [GO:0005737]	glutamate dehydrogenase (NADP+) activity [GO:0004354]	cytoplasm [GO:0005737];glutamate biosynthetic process [GO:0006537];glutamate dehydrogenase (NADP+) activity [GO:0004354]	428	8	8	8	24.8	47.312	0	37.377	1637700000	60	1	-0.090473	0.78696	0.47513	-0.230944	0.179174	0.875629	-0.0549346	1.49264	0.256551	-0.768453	1.03326	0.158373	-0.658554		0.826914	0.847294	0.74907	0.634736	0.890092	0.982894	0.81838	0.917	0.57113	0.514403	0.686429	0.779207	0.680314	0.757767	0.482999	0.901074	0.6926
ATP-dependent Clp protease proteolytic subunit 1 (EC 3.4.21.92) (Endopeptidase Clp 1)	clpP1 slr0542	P54416	CLPP1_SYNY3		cytoplasm [GO:0005737]	serine-type endopeptidase activity [GO:0004252]	cytoplasm [GO:0005737];serine-type endopeptidase activity [GO:0004252]	198	11	11	10	53	21.741	0	212.69	8360400000	107	1	-0.365533	2.03804	0.218126	-0.457104	0.968162	0.419555	-0.412495	1.72252	0.259255	-0.465293	2.07019	0.0760235	-0.454314		8.02171	5.65464	6.60003	5.84389	4.72504	5.13693	5.1335	5.02455	4.82621	3.64185	4.63279	4.45949	4.69255	4.423	3.95422	4.23986	4.3148
Probable branched-chain-amino-acid aminotransferase (BCAT) (EC 2.6.1.42)	ilvE slr0032	P54691	ILVE_SYNY3	isoleucine biosynthetic process [GO:0009097];leucine biosynthetic process [GO:0009098];valine biosynthetic process [GO:0009099]		L-isoleucine transaminase activity [GO:0052656];L-leucine transaminase activity [GO:0052654];L-valine transaminase activity [GO:0052655]	isoleucine biosynthetic process [GO:0009097];leucine biosynthetic process [GO:0009098];L-isoleucine transaminase activity [GO:0052656];L-leucine transaminase activity [GO:0052654];L-valine transaminase activity [GO:0052655];valine biosynthetic process [GO:0009099]	305	24	24	24	82.6	33.951	0	323.31	11711000000	578	1	0.115927	0.941372	0.47475	0.193296	0.535076	0.674551	0.138345	0.657762	0.591078	0.172687	1.45445	0.194801	0.290166		5.29309	3.85367	4.79846	3.69258	4.62331	5.36548	4.67752	4.2348	4.94405	4.75245	5.08301	4.48895	4.95736	5.33107	5.41474	5.86454	4.985
N-acetyl-gamma-glutamyl-phosphate reductase (AGPR) (EC 1.2.1.38) (N-acetyl-glutamate semialdehyde dehydrogenase) (NAGSA dehydrogenase)	argC sll0080	P54899	ARGC_SYNY3	arginine biosynthetic process [GO:0006526]	cytoplasm [GO:0005737]	N-acetyl-gamma-glutamyl-phosphate reductase activity [GO:0003942];NAD binding [GO:0051287];protein dimerization activity [GO:0046983]	arginine biosynthetic process [GO:0006526];cytoplasm [GO:0005737];N-acetyl-gamma-glutamyl-phosphate reductase activity [GO:0003942];NAD binding [GO:0051287];protein dimerization activity [GO:0046983]	351	19	19	19	61.8	38.209	0	323.31	5998100000	344	1	0.0308671	0.23289	0.777062	-0.129324	0.0256464	0.974182	-0.0146346	0.443344	0.6577	-0.176693	0.658134	0.425499	-0.249814		1.79727	3.05873	1.81563	2.65945	2.32354	2.48804	2.41453	2.48698	2.54628	1.80434	2.14679	3.09702	1.65401	1.62195	2.20885	2.35858	1.79004
Gamma-glutamyl phosphate reductase 1 (GPR 1) (EC 1.2.1.41) (Glutamate-5-semialdehyde dehydrogenase 1) (Glutamyl-gamma-semialdehyde dehydrogenase 1) (GSA dehydrogenase 1)	proA1 proA sll0373	P54902	PROA1_SYNY3	L-proline biosynthetic process [GO:0055129]	cytoplasm [GO:0005737]	glutamate-5-semialdehyde dehydrogenase activity [GO:0004350];NADP binding [GO:0050661]	cytoplasm [GO:0005737];glutamate-5-semialdehyde dehydrogenase activity [GO:0004350];L-proline biosynthetic process [GO:0055129];NADP binding [GO:0050661]	433	15	15	15	41.3	46.349	0	87.297	2497000000	179	1	0.00694699	0.490484	0.700184	0.108796	0.193418	0.878227	0.0490654	0.94351	0.511119	0.184187	0.954409	0.367463	0.211666		0.68052	0.655439	0.719802	0.812043	0.933503	0.782633	0.674805	0.808541	0.753663	0.774679	0.743695	0.81179	0.812743	0.800696	0.903185	0.758761	0.833696
Alanine racemase (EC 5.1.1.1)	alr slr0827	P54918	ALR_SYNY3	D-alanine biosynthetic process [GO:0030632]		alanine racemase activity [GO:0008784]	alanine racemase activity [GO:0008784];D-alanine biosynthetic process [GO:0030632]	372	2	2	2	8.9	40.673	0	4.9521	156270000	17	1	-0.155421	0.0185523	0.9741	-0.0441059	0.512024	0.509485	-1.20822	0.458669	0.521297	0.769919	0.421259	0.447792	0.762298		0.152556		0.0758804	0.105867	0.0624232	0.023026	0.0751357	0.0538128	0.0699803	0.05373	0.0273803		0.112117	0.0595533	0.0500979	0.0207164	0.0677936
Uncharacterized hydrolase sll0100 (EC 3.-.-.-)	sll0100	P54984	Y100_SYNY3	metabolic process [GO:0008152]		hydrolase activity [GO:0016787]	hydrolase activity [GO:0016787];metabolic process [GO:0008152]	393	3	3	3	10.2	42.656	0	12.752	168930000	27	1	0.168549	0.25126	0.694496	0.509358	0.913966	0.379125	1.27507	0.949574	0.271847	-2.08479	0.50323	0.380254	0.804308		0.0894366	0.163338		0.0454754	0.0549029		0.121308	0.114387	0.114133	0.0315257	0.0841136	0.133821	0.0337837	0.114279	0.0384864	0.12769	0.111421
Ferredoxin-dependent glutamate synthase 1 (EC 1.4.7.1) (Fd-GOGAT)	gltB sll1502	P55037	GLTB_SYNY3	ammonia assimilation cycle [GO:0019676];glutamate biosynthetic process [GO:0006537];L-glutamate biosynthetic process [GO:0097054]	cytoplasm [GO:0005737]	3 iron, 4 sulfur cluster binding [GO:0051538];glutamate synthase (ferredoxin) activity [GO:0016041];glutamate synthase activity [GO:0015930];metal ion binding [GO:0046872]	3 iron, 4 sulfur cluster binding [GO:0051538];ammonia assimilation cycle [GO:0019676];cytoplasm [GO:0005737];glutamate biosynthetic process [GO:0006537];glutamate synthase (ferredoxin) activity [GO:0016041];glutamate synthase activity [GO:0015930];L-glutamate biosynthetic process [GO:0097054];metal ion binding [GO:0046872]	1550	63	61	61	51.1	169.07	0	323.31	21173000000	1017	1	-0.022733	0.00874059	0.993066	0.00363621	0.142631	0.903164	-0.0427346	0.0254075	0.981014	-0.00885308	0.404925	0.653584	-0.117954		2.68051	1.96365	2.33962	1.73331	2.00517	2.40145	2.09383	1.9375	2.26058	1.79623	2.44237	2.34694	2.23329	1.92349	1.76027	2.24314	2.11549
Ferredoxin-dependent glutamate synthase 2 (EC 1.4.7.1) (FD-GOGAT)	gltS sll1499	P55038	GLTS_SYNY3	ammonia assimilation cycle [GO:0019676];glutamate biosynthetic process [GO:0006537];L-glutamate biosynthetic process [GO:0097054]	cytoplasm [GO:0005737]	3 iron, 4 sulfur cluster binding [GO:0051538];glutamate synthase (ferredoxin) activity [GO:0016041];glutamate synthase activity [GO:0015930];metal ion binding [GO:0046872]	3 iron, 4 sulfur cluster binding [GO:0051538];ammonia assimilation cycle [GO:0019676];cytoplasm [GO:0005737];glutamate biosynthetic process [GO:0006537];glutamate synthase (ferredoxin) activity [GO:0016041];glutamate synthase activity [GO:0015930];L-glutamate biosynthetic process [GO:0097054];metal ion binding [GO:0046872]	1556	63	63	61	48.5	169.5	0	323.31	19457000000	1119	1	0.018567	0.511285	0.707528	0.0991762	0.540959	0.711459	0.104985	0.42084	0.73	0.114007	0.385002	0.67471	0.110666		2.40779	2.04306	1.96138	1.67717	1.95183	2.34861	2.20938	1.70408	1.79103	2.12693	2.20149	2.17766	1.95054	2.2611	2.10657	2.2187	2.33657
Deaminated glutathione amidase (dGSH amidase) (EC 3.5.1.-) (Nitrilase homolog 1) (syNit1)	sll0601	P55175	NIT1_SYNY3	nitrogen compound metabolic process [GO:0006807]		hydrolase activity, acting on carbon-nitrogen (but not peptide) bonds [GO:0016810]	hydrolase activity, acting on carbon-nitrogen (but not peptide) bonds [GO:0016810];nitrogen compound metabolic process [GO:0006807]	272	7	7	7	55.1	30.191	0	139.68	845860000	125	1	-0.015253	0.224688	0.800683	0.100276	0.552442	0.665956	0.147145	0.0132471	0.988857	0.00702697	0.0964985	0.899102	-0.0354943		0.314016	0.412834	0.381954	0.393144	0.432397	0.302018	0.43686	0.392181	0.364248	0.423599	0.290313	0.503924	0.372541	0.549018	0.398208	0.547305	0.405674
Ssl0788 protein	ssl0788	P72570	P72570_SYNY3		integral component of membrane [GO:0016021]		integral component of membrane [GO:0016021]	97	2	2	2	24.7	10.632	0	11.693	172600000	13	1	0.166567	0.0872371	0.922941	0.0445762	0.143694	0.835407	-0.313451	0.34445	0.631908	-0.466795	0.311325	0.653894	0.171546		0.274582	0.220131	0.239214	0.15864	0.25586	0.235012	0.289381	0.220109	0.252804	0.276236	0.170647	0.295121	0.239479	0.234332	0.242355	0.295702	0.349023
Ycf40 protein	ycf40	P72573	P72573_SYNY3					71	2	2	2	47.9	7.8938	0	10.168	73155000	29	1	-0.351536	0.195159	0.772491	0.23468	0.305268	0.685465	0.368249	0.0475212	0.946433	0.067071	0.0586279	0.907312	0.0868898		0.142804	0.135591		0.0979459	0.124587	0.12236	0.130538	0.10211		0.106851	0.127404	0.0955089	0.079196	0.119927	0.118914	0.151797	0.0912516
Prenyl transferase (EC 2.5.1.-)	preA slr0611	P72580	PREA_SYNY3	isoprenoid biosynthetic process [GO:0008299];photosynthesis [GO:0015979]		metal ion binding [GO:0046872];transferase activity, transferring alkyl or aryl (other than methyl) groups [GO:0016765]	isoprenoid biosynthetic process [GO:0008299];metal ion binding [GO:0046872];photosynthesis [GO:0015979];transferase activity, transferring alkyl or aryl (other than methyl) groups [GO:0016765]	323	8	8	8	29.1	35.725	0	88.837	1347600000	85	1	-0.065333	0.247211	0.803642	0.0848962	0.395751	0.671007	-0.227235	0.453207	0.662224	0.166367	0.574119	0.461357	0.241406		0.493804	0.471828	0.44543	0.345829	0.56838	0.496136	0.465626	0.504209	0.375476	0.371922	0.538188	0.517159	0.397099	0.475371	0.521086	0.583263	0.37814
Slr0613 protein	slr0613	P72582	P72582_SYNY3		integral component of membrane [GO:0016021]		integral component of membrane [GO:0016021]	173	7	7	7	46.8	18.297	0	71.256	2633200000	131	1	0.129047	0.281044	0.757674	0.125396	0.238367	0.802532	0.114325	0.399068	0.671162	0.184107	0.0416976	0.948746	-0.0224742		2.63428	2.28174	1.73204	3.05152	3.51281	3.39946	2.51619	3.11146	2.81628	2.32861	3.17264	2.85379	2.81195	2.83908	2.38434	2.94388	3.14028
Ycf53-like protein	sll0558	P72583	YC53L_SYNY3					233	6	6	6	47.2	26.465	0	130.51	1865800000	83	1	-0.197113	2.24976	0.208778	-0.567464	1.24467	0.406596	-0.388855	0.914068	0.443298	-0.265753	1.3396	0.142707	-0.447154		1.43377	1.08195	1.68339	1.61097	1.39438	1.40572	1.25975	1.21167	1.23097	1.12161	1.07772	0.734472	0.996175	1.08262	0.961456	1.35427	0.996605
Magnesium-protoporphyrin IX monomethyl ester [oxidative] cyclase 1 (Mg-protoporphyrin IX monomethyl ester oxidative cyclase 1) (EC 1.14.13.81)	acsF1 sll1214	P72584	ACSF1_SYNY3	light-independent chlorophyll biosynthetic process [GO:0036068];photosynthesis [GO:0015979]		magnesium-protoporphyrin IX monomethyl ester (oxidative) cyclase activity [GO:0048529];metal ion binding [GO:0046872]	light-independent chlorophyll biosynthetic process [GO:0036068];magnesium-protoporphyrin IX monomethyl ester (oxidative) cyclase activity [GO:0048529];metal ion binding [GO:0046872];photosynthesis [GO:0015979]	358	26	26	26	64.2	42.153	0	323.31	18047000000	607	1	0.339387	1.09536	0.300862	0.487696	1.46362	0.400438	0.581025	1.62719	0.247712	0.603307	0.926824	0.25255	0.377426		3.2773	3.56236	2.95012	4.75363	6.25551	5.03052	5.23701	5.21582	4.03031	5.99588	7.00645	5.26955	5.41354	6.81648	4.07498	7.15731	6.10967
GDP-L-fucose synthase (EC 1.1.1.271) (GDP-4-keto-6-deoxy-D-mannose-3,5-epimerase-4-reductase)	fcl sll1213	P72585	P72585_SYNY3	'de novo' GDP-L-fucose biosynthetic process [GO:0042351]		GDP-L-fucose synthase activity [GO:0050577];isomerase activity [GO:0016853];NADP+ binding [GO:0070401]	'de novo' GDP-L-fucose biosynthetic process [GO:0042351];GDP-L-fucose synthase activity [GO:0050577];isomerase activity [GO:0016853];NADP+ binding [GO:0070401]	312	15	15	15	56.7	34.719	0	323.31	7307100000	326	1	-0.117033	0.305464	0.861109	-0.0448039	0.232335	0.862735	-0.0535346	0.376172	0.834882	0.0474469	0.0271992	0.981539	-0.0048543		3.17622	2.83615	2.75427	2.74866	2.65705	2.48132	2.98048	2.55158	2.41578	2.64959	2.78038	2.49075	2.74341	3.01849	2.70531	2.96086	2.69857
GDP-mannose 4,6-dehydratase (EC 4.2.1.47) (GDP-D-mannose dehydratase)	rfbD gmd	P72586	P72586_SYNY3	GDP-mannose metabolic process [GO:0019673]		GDP-mannose 4,6-dehydratase activity [GO:0008446];NADP+ binding [GO:0070401]	GDP-mannose 4,6-dehydratase activity [GO:0008446];GDP-mannose metabolic process [GO:0019673];NADP+ binding [GO:0070401]	362	20	20	20	62.2	41.333	0	323.31	10291000000	349	1	0.0631269	0.0102895	0.993445	0.00243618	0.0200492	0.983524	-0.00653467	0.196184	0.891192	0.0385669	0.75777	0.604896	0.0946658		3.05085	3.64075	3.36539	3.50212	3.3077	2.76966	3.89856	3.4136	3.75781	3.89081	3.00525	3.45355	3.43538	3.11197	3.93563	2.56599	3.91875
Biosynthetic arginine decarboxylase 2 (ADC 2) (EC 4.1.1.19)	speA2 speA slr1312	P72587	SPEA2_SYNY3	arginine catabolic process [GO:0006527];spermidine biosynthetic process [GO:0008295]		arginine decarboxylase activity [GO:0008792];metal ion binding [GO:0046872]	arginine catabolic process [GO:0006527];arginine decarboxylase activity [GO:0008792];metal ion binding [GO:0046872];spermidine biosynthetic process [GO:0008295]	659	16	16	16	31.1	74.476	0	114.66	1405600000	151	1	0.389807	0.723047	0.411817	0.431656	1.19639	0.393582	0.601105	0.760451	0.435215	0.387007	0.54977	0.431828	0.336846		0.253246	0.318802	0.145266	0.165916	0.327309	0.265946	0.364994	0.3211	0.241633	0.326526	0.206267	0.380951	0.260052	0.389157	0.357519	0.318313	0.277257
DNA ligase (EC 6.5.1.2) (Polydeoxyribonucleotide synthase [NAD(+)])	ligA lig sll1209	P72588	DNLJ_SYNY3	base-excision repair, DNA ligation [GO:0006288];DNA replication [GO:0006260]	cytosol [GO:0005829]	DNA binding [GO:0003677];DNA ligase (NAD+) activity [GO:0003911];metal ion binding [GO:0046872]	base-excision repair, DNA ligation [GO:0006288];cytosol [GO:0005829];DNA binding [GO:0003677];DNA ligase (NAD+) activity [GO:0003911];DNA replication [GO:0006260];metal ion binding [GO:0046872]	669	16	16	16	31.4	74.601	0	43.022	720110000	89	1	-0.141253	0.505838	0.578191	-0.234904	0.188635	0.845182	-0.0922946	1.00997	0.396295	-0.309853	0.920195	0.295426	-0.300574		0.120333	0.180733	0.147458	0.100748	0.135131	0.185271	0.128652	0.0958414	0.120382	0.0973059	0.141462	0.140777	0.117048	0.110027	0.0754201	0.143122	0.0875101
Iron(III) dicitrate transport system permease protein FecE	fecE	P72592	P72592_SYNY3			ATP binding [GO:0005524];ATPase activity [GO:0016887]	ATP binding [GO:0005524];ATPase activity [GO:0016887]	268	4	4	4	25	29.658	0	8.3265	327460000	15	1	-0.004493	0.00177786	0.998026	0.00189617	0.963407	0.415642	0.496105	0.78903	0.401558	0.466387	0.372965	0.593426	0.202726		0.131479	0.186421	0.124876	0.195336	0.268395	0.171432	0.181714	0.303484	0.0900763	0.185523	0.27121	0.235154	0.122578	0.0940275	0.219744	0.336742	0.270743
Sll1399 protein	sll1399	P72617	P72617_SYNY3					401	9	9	9	23.9	46.195	0	13.34	759410000	43	1	0.487567	0.17187	0.81404	0.148856	0.286937	0.73247	0.213725	0.628428	0.509413	0.311807	0.736204	0.367987	0.289306		0.285193	0.348598	0.223938	0.249988	0.2337	0.472638	0.346216	0.309003	0.405758	0.343497	0.411876	0.428058	0.22719	0.394918	0.137737	0.5561	0.363819
dTDP-4-dehydrorhamnose reductase (EC 1.1.1.133)	rfbD	P72621	P72621_SYNY3	dTDP-rhamnose biosynthetic process [GO:0019305]		dTDP-4-dehydrorhamnose reductase activity [GO:0008831]	dTDP-4-dehydrorhamnose reductase activity [GO:0008831];dTDP-rhamnose biosynthetic process [GO:0019305]	280	6	6	6	32.9	30.249	0	48.589	361930000	66	1	0.555667	1.17792	0.260871	0.643336	0.98715	0.405794	0.595365	1.35069	0.257129	0.669367	1.0588	0.15078	0.660786		0.17438	0.140909	0.0851867	0.0801157	0.172579	0.289194	0.181211	0.181418	0.13555	0.154071	0.278622	0.203187	0.13931	0.219688	0.155285	0.312823	0.182756
Peptide methionine sulfoxide reductase MsrA 1 (Protein-methionine-S-oxide reductase 1) (EC 1.8.4.11) (Peptide-methionine (S)-S-oxide reductase 1) (Peptide Met(O) reductase 1)	msrA1 sll1394	P72622	MSRA1_SYNY3			peptide-methionine (S)-S-oxide reductase activity [GO:0008113]	peptide-methionine (S)-S-oxide reductase activity [GO:0008113]	222	5	5	5	26.6	24.209	0	124.58	1174200000	106	1	-0.038233	0.0821219	0.931386	-0.0340039	0.399299	0.685002	-0.184155	0.536027	0.60021	0.213467	1.21845	0.160329	0.448966		0.7352	0.731705	0.991285	0.768293	1.04343	0.886386	0.527354	0.76133	0.888283	1.18449	0.869816	0.658556	0.792549	1.02082	0.819885	0.775564	0.826848
Probable glycogen synthase 2 (EC 2.4.1.21) (Starch [bacterial glycogen] synthase 2)	glgA2 sll1393	P72623	GLGA2_SYNY3	glycogen biosynthetic process [GO:0005978]		alpha-1,4-glucan synthase activity [GO:0033201];glycogen (starch) synthase activity [GO:0004373];starch synthase activity [GO:0009011];transferase activity, transferring glycosyl groups [GO:0016757]	alpha-1,4-glucan synthase activity [GO:0033201];glycogen (starch) synthase activity [GO:0004373];glycogen biosynthetic process [GO:0005978];starch synthase activity [GO:0009011];transferase activity, transferring glycosyl groups [GO:0016757]	491	14	14	14	42.2	56.224	0	323.31	8219100000	257	1	-0.026793	0.705241	0.503075	-0.231964	0.670529	0.560341	-0.238135	0.426087	0.673513	-0.162593	1.14114	0.19349	-0.394074		3.45386	2.85806	2.65566	2.63048	1.87102	2.89429	2.72214	2.52134	3.01424	1.9637	2.35036	2.64007	2.35328	2.08179	1.8996	2.02921	2.30265
Slr1501 protein	slr1501	P72625	P72625_SYNY3			N-acetyltransferase activity [GO:0008080]	N-acetyltransferase activity [GO:0008080]	225	2	2	2	8.9	24.988	0	14.797	348350000	45	1	-0.186613	0.474972	0.585375	0.250096	0.0468005	0.946653	0.0402853	0.18361	0.813915	0.129647	0.531294	0.446978	0.320366		0.313972	0.302946	0.18483	0.133169	0.267244	0.184681	0.277343	0.225233	0.184935	0.153592	0.263447	0.246743	0.277964	0.310965	0.264932	0.192578	0.267831
Slr1116 protein	slr1116	P72629	P72629_SYNY3					173	3	3	3	21.4	20.103	0.00055218	2.9862	151980000	13	1	-0.354993	0.630094	0.394341	-0.797598	0.122571	0.862999	-0.170395	1.00935	0.316157	-0.736353	1.13449	0.125915	-0.765774		0.210298	0.30442	0.144944	0.13181	0.0781358	0.129355	0.158565	0.157257	0.147623	0.0586458	0.130406	0.261989		0.0685987	0.0890953	0.136183	0.0789506
Sll1064 protein	sll1064	P72631	P72631_SYNY3			acid phosphatase activity [GO:0003993];metal ion binding [GO:0046872]	acid phosphatase activity [GO:0003993];metal ion binding [GO:0046872]	568	4	4	4	9.3	64.733	0	7.0704	222150000	33	1	0.299421	0.257523	0.689312	-0.50213	0.318837	0.672502	0.41712	0.726652	0.378337	0.871861	0.585352	0.324056	0.75756		0.0593302	0.0407017	0.0980371	0.0495328		0.0492479	0.0733298	0.0375249	0.0421154	0.0671379	0.0315106	0.0327441	0.00617636	0.0426215	0.0876983	0.072344	0.0591079
Sll1062 protein	sll1062	P72635	P72635_SYNY3					125	3	3	3	32	14.606	0	11.379	83129000	9	1	-0.333155	0.511773	0.467201	0.692777	0.158185	0.817024	0.335209	0.000844797	0.998844	-0.00141211	1.52054	0.0505101	1.56487		0.0341969	0.0452868	0.118222	0.0724901			0.034909	0.0417695	0.0781501	0.0543217	0.0467913	0.0493769	0.12505	0.116996	0.0530499	0.0628135	0.106942
UPF0182 protein sll1060	sll1060	P72637	Y1060_SYNY3		integral component of membrane [GO:0016021];plasma membrane [GO:0005886]		integral component of membrane [GO:0016021];plasma membrane [GO:0005886]	1032	5	5	5	5.9	117.16	0	5.5611	122690000	25	1	-0.714693	0.662243	0.372062	-0.941184	0.575705	0.484537	-0.848775	0.869643	0.32592	-1.18013	1.03074	0.117709	-1.33993		0.188614	0.0201557	0.0198361	0.0127623	0.0193091	0.0169204	0.0204202	0.0221676	0.016002	0.0127361	0.0112634	0.0175034	0.0134577	0.0168913	0.0158881	0.0171448	0.0154934
Adenylate kinase 2 (AK 2) (EC 2.7.4.3) (ATP-AMP transphosphorylase 2) (ATP:AMP phosphotransferase 2) (Adenylate monophosphate kinase 2)	adk2 sll1059	P72641	KAD2_SYNY3	AMP salvage [GO:0044209]	cytoplasm [GO:0005737]	adenylate kinase activity [GO:0004017];ATP binding [GO:0005524]	adenylate kinase activity [GO:0004017];AMP salvage [GO:0044209];ATP binding [GO:0005524];cytoplasm [GO:0005737]	181	5	5	5	40.3	20.34	0	16.473	301350000	39	1	-0.165233	1.19746	0.293326	-0.437724	1.12322	0.383854	-0.636315	1.23121	0.325199	-0.434793	2.08421	0.0448214	-0.720874	+	0.356756	0.281622	0.286414	0.202744	0.224397	0.311738	0.252498	0.218422	0.220751	0.194558	0.162182	0.178758	0.281474	0.207564	0.169551	0.225362	0.123955
4-hydroxy-tetrahydrodipicolinate reductase (HTPA reductase) (EC 1.17.1.8)	dapB sll1058	P72642	DAPB_SYNY3	diaminopimelate biosynthetic process [GO:0019877];lysine biosynthetic process via diaminopimelate [GO:0009089]	cytosol [GO:0005829]	4-hydroxy-tetrahydrodipicolinate reductase [GO:0008839]	4-hydroxy-tetrahydrodipicolinate reductase [GO:0008839];cytosol [GO:0005829];diaminopimelate biosynthetic process [GO:0019877];lysine biosynthetic process via diaminopimelate [GO:0009089]	275	9	9	9	50.5	29.09	0	249.67	2641700000	161	1	-0.181153	0.98562	0.393187	-0.280304	0.226239	0.808	-0.114255	0.569108	0.578042	-0.229413	1.50482	0.124212	-0.439134		1.63242	2.1935	2.0589	2.09192	1.36313	1.33775	2.17233	1.68645	1.82297	1.25594	1.40346	1.69311	1.73456	1.30579	1.47856	1.3398	1.68798
Phosphoribosylformylglycinamidine synthase subunit PurL (FGAM synthase) (EC 6.3.5.3) (Formylglycinamide ribonucleotide amidotransferase subunit II) (FGAR amidotransferase II) (FGAR-AT II) (Glutamine amidotransferase PurL) (Phosphoribosylformylglycinamidine synthase subunit II)	purL sll1056	P72644	PURL_SYNY3	'de novo' IMP biosynthetic process [GO:0006189]	cytoplasm [GO:0005737]	ATP binding [GO:0005524];metal ion binding [GO:0046872];phosphoribosylformylglycinamidine synthase activity [GO:0004642]	ATP binding [GO:0005524];cytoplasm [GO:0005737];'de novo' IMP biosynthetic process [GO:0006189];metal ion binding [GO:0046872];phosphoribosylformylglycinamidine synthase activity [GO:0004642]	768	22	22	22	43.9	81.831	0	323.31	7940000000	431	1	-0.058153	0.398034	0.773783	-0.0725039	0.121055	0.920119	-0.0288346	0.407947	0.752887	-0.0945131	0.399438	0.728767	-0.0773542		2.13126	2.13544	1.98683	1.75617	1.9366	2.08061	1.98542	1.8627	1.73723	1.8807	2.06749	2.08808	1.71626	1.89359	1.70491	2.19682	1.81415
Slr1122 protein	slr1122	P72645	P72645_SYNY3					250	2	2	2	10.4	28.176	0	3.6931	126600000	11	1	0.751027	0.567086	0.424073	0.792216	0.751295	0.421736	1.00789	0.0777149	0.899414	-0.215193	0.0174501	0.968712	-0.0596144		0.0667962	0.0608219	0.00746404	0.0868716	0.0720892	0.0726802	0.0786583	0.0859888	0.0626601	0.0832429	0.0628686	0.064136	0.0794434	0.0889307	0.103823	0.104264	0.0563279
Sll1053 protein	sll1053	P72647	P72647_SYNY3	protein secretion [GO:0009306];transmembrane transport [GO:0055085]	integral component of membrane [GO:0016021]	transporter activity [GO:0005215]	integral component of membrane [GO:0016021];protein secretion [GO:0009306];transmembrane transport [GO:0055085];transporter activity [GO:0005215]	520	18	18	18	56.2	56.258	0	323.31	1954700000	248	1	-0.079133	0.242968	0.761477	-0.154204	0.146926	0.863059	-0.0997546	0.106567	0.894771	0.0736669	0.375601	0.571689	0.234786		0.470547	0.525635	0.510992	0.361841	0.341445	0.31345	0.494055	0.343431	0.391719	0.569738	0.360828	0.31804	0.254118	0.581571	0.539537	0.593993	0.269806
Guanylate kinase (EC 2.7.4.8) (GMP kinase)	gmk slr1123	P72648	KGUA_SYNY3		cytosol [GO:0005829]	ATP binding [GO:0005524];guanylate kinase activity [GO:0004385]	ATP binding [GO:0005524];cytosol [GO:0005829];guanylate kinase activity [GO:0004385]	191	6	6	6	39.3	21.427	0	38.53	478740000	41	1	-0.170533	0.0158843	0.982093	-0.0165239	0.0271137	0.967587	-0.0280746	0.074312	0.914758	-0.082493	0.0565074	0.911875	0.0775858		0.397247	0.409415	0.119325	0.215331	0.228969	0.266999	0.318605	0.177328	0.105316	0.333526	0.233968	0.220046	0.193	0.336651	0.270124	0.299498	0.308105
Phosphoglycerate mutase	gpmB	P72649	P72649_SYNY3	metabolic process [GO:0008152]		catalytic activity [GO:0003824]	catalytic activity [GO:0003824];metabolic process [GO:0008152]	349	6	6	6	28.9	38.881	0	75.683	836000000	71	1	0.019907	0.0450357	0.942261	-0.102804	0.117875	0.859684	-0.315855	0.199213	0.774965	-0.293493	0.12278	0.812279	0.182946		0.676335	0.120527	0.82632	0.300769	0.260116	0.754507	0.0856052	0.157617	0.884535	0.627015	0.0864963	0.635462	0.679984	0.152051	0.649361	0.808611	0.559416
Zeaxanthin glucosyl transferase	crtX	P72650	P72650_SYNY3	antibiotic metabolic process [GO:0016999]	intracellular membrane-bounded organelle [GO:0043231]	transferase activity, transferring hexosyl groups [GO:0016758];UDP-glycosyltransferase activity [GO:0008194]	antibiotic metabolic process [GO:0016999];intracellular membrane-bounded organelle [GO:0043231];transferase activity, transferring hexosyl groups [GO:0016758];UDP-glycosyltransferase activity [GO:0008194]	419	6	6	6	24.3	45.33	0	11.546	140810000	24	1	-0.840227	0.430727	0.528776	-0.630598	0.323099	0.662421	-0.647888	0.020663	0.97469	-0.037907	0.155524	0.758879	0.293212			0.0251262	0.184702	0.038203	0.0681013	0.010923	0.0351226	0.0214035	0.0305156	0.0497304	0.0354907	0.0305217	0.0156692	0.0608806	0.0249363	0.0169381	0.0083344
Phycocyanin alpha phycocyanobilin lyase CpcF	cpcF sll1051	P72652	CPCF_SYNY3		phycobilisome [GO:0030089]	lyase activity [GO:0016829]	lyase activity [GO:0016829];phycobilisome [GO:0030089]	214	2	2	2	14.5	23.179	0	53.552	155520000	34	1	0.205007	0.811684	0.420761	0.306156	0.870812	0.451733	0.351885	1.09559	0.335019	0.495887	1.3907	0.107004	0.586806		0.0953786	0.0678378	0.0890693	0.0630277	0.114326	0.101412	0.0807185	0.0804588	0.0955098	0.134341	0.101165	0.10016	0.0799295	0.122812	0.120633	0.141289	0.1248
Sll1049 protein	sll1049	P72653	P72653_SYNY3					564	12	12	12	29.1	63.949	0	61.165	934020000	96	1	0.261307	0.825538	0.41075	0.331536	1.09988	0.414552	0.385105	0.91955	0.376319	0.439407	0.278873	0.704392	0.131906		0.260492	0.201553	0.145236	0.150823	0.17517	0.246184	0.303263	0.284597	0.164561	0.142514	0.234244	0.280074	0.175005	0.285137	0.194157	0.274622	0.2832
Slr1127 protein	slr1127	P72654	P72654_SYNY3					263	5	5	5	49.4	28.171	0	6.8214	788970000	7	1	-0.231093	1.56698	0.247316	-0.473324	0.89816	0.43782	-0.420355	0.866028	0.419318	-0.347473	1.57152	0.102505	-0.503114		1.38253	0.916517	1.58104	1.2159	1.1484	1.08276	1.24785	0.996881	1.42523	0.654185	0.995355	0.858493	1.06317	0.89343	0.668265	0.820581	0.817672
Uncharacterized protein slr1128	slr1128	P72655	Y1128_SYNY3		integral component of membrane [GO:0016021]		integral component of membrane [GO:0016021]	321	23	23	23	74.5	35.727	0	323.31	13416000000	401	1	-0.173073	1.3526	0.254016	-0.564244	0.889098	0.415364	-0.596755	1.01404	0.339589	-0.557033	1.7107	0.0707913	-0.660974		8.334	6.9347	7.99042	7.06519	3.94036	6.50616	6.67812	6.31286	7.22247	3.56221	4.89966	5.56769	5.15607	3.44696	3.75183	4.64963	2.79083
Ribonuclease E/G-like protein (RNase E/G-like protein) (EC 3.1.26.-)	rne slr1129	P72656	RNE_SYNY3	rRNA processing [GO:0006364]	cytoplasm [GO:0005737]	endonuclease activity [GO:0004519];metal ion binding [GO:0046872];ribonuclease activity [GO:0004540];RNA binding [GO:0003723]	cytoplasm [GO:0005737];endonuclease activity [GO:0004519];metal ion binding [GO:0046872];ribonuclease activity [GO:0004540];RNA binding [GO:0003723];rRNA processing [GO:0006364]	674	32	32	32	59.2	74.944	0	323.31	10014000000	528	1	-0.057893	0.246223	0.772991	-0.125824	0.0796103	0.920788	-0.0476146	0.00608168	0.992677	0.0048069	0.00859614	0.988788	0.00616575		3.25737	2.35403	2.19356	1.77145	2.52805	3.31752	2.65083	1.55897	2.44137	1.84136	3.01067	1.90432	1.68293	2.58816	1.9503	3.55689	2.23891
Mutator MutT protein	mutT	P72658	P72658_SYNY3	DNA repair [GO:0006281]		8-oxo-7,8-dihydroguanosine triphosphate pyrophosphatase activity [GO:0008413]	8-oxo-7,8-dihydroguanosine triphosphate pyrophosphatase activity [GO:0008413];DNA repair [GO:0006281]	136	4	4	4	32.4	15.152	0	13.211	273310000	47	1	-0.279653	0.441148	0.606677	0.247636	0.0928511	0.909874	0.0646454	0.253871	0.773586	0.142687	0.672438	0.382011	-0.309774		0.177884	0.381865	0.238601	0.31858	0.277763	0.0926739	0.30803	0.354386	0.220812	0.243581	0.26239	0.307782	0.347617	0.488059	0.246933	0.248707	0.341816
Polyribonucleotide nucleotidyltransferase (EC 2.7.7.8) (Polynucleotide phosphorylase) (PNPase)	pnp sll1043	P72659	PNP_SYNY3	mRNA catabolic process [GO:0006402];RNA processing [GO:0006396]	cytoplasm [GO:0005737]	metal ion binding [GO:0046872];polyribonucleotide nucleotidyltransferase activity [GO:0004654];RNA binding [GO:0003723]	cytoplasm [GO:0005737];metal ion binding [GO:0046872];mRNA catabolic process [GO:0006402];polyribonucleotide nucleotidyltransferase activity [GO:0004654];RNA binding [GO:0003723];RNA processing [GO:0006396]	718	56	56	56	71.2	77.83	0	323.31	59091000000	1282	1	0.143607	1.3583	0.279919	0.405496	1.20101	0.412323	0.382185	1.19687	0.339708	0.401567	2.45155	0.0414925	0.596266	+	8.91979	7.83935	9.00216	8.44694	12.2111	9.16419	9.83308	8.65296	10.0665	13.6069	12.0135	10.5208	9.62624	15.925	13.662	15.0795	12.7365
Malic enzyme	me	P72661	P72661_SYNY3			malate dehydrogenase (decarboxylating) (NAD+) activity [GO:0004471];metal ion binding [GO:0046872];NAD binding [GO:0051287]	malate dehydrogenase (decarboxylating) (NAD+) activity [GO:0004471];metal ion binding [GO:0046872];NAD binding [GO:0051287]	463	15	15	15	57.2	48.699	0	323.31	7486400000	349	1	0.132327	0.931203	0.410976	0.279736	0.721942	0.546914	0.243145	0.930967	0.429525	0.291787	1.56371	0.109714	0.465206		2.63593	2.05799	3.02592	2.08801	3.23312	2.68218	2.79887	2.52782	2.73415	3.37847	2.79584	3.06626	2.97888	2.91668	3.92255	3.14273	3.36334
Cysteine synthase	cysM	P72662	P72662_SYNY3	cysteine biosynthetic process from serine [GO:0006535]	cytoplasm [GO:0005737]	pyridoxal phosphate binding [GO:0030170]	cysteine biosynthetic process from serine [GO:0006535];cytoplasm [GO:0005737];pyridoxal phosphate binding [GO:0030170]	325	13	13	13	50.8	34.734	0	148.33	2834200000	206	1	-0.065953	0.242426	0.784842	-0.106904	0.0478155	0.953096	-0.0218546	0.471864	0.647578	-0.177573	0.961834	0.276025	-0.310454		1.34977	1.04069	1.23986	0.908104	1.28114	1.15758	0.881751	1.12124	1.18821	1.18556	1.20112	0.810385	0.997903	1.47706	0.975013	0.975773	1.03225
4-diphosphocytidyl-2-C-methyl-D-erythritol kinase (CMK) (EC 2.7.1.148) (4-(cytidine-5'-diphospho)-2-C-methyl-D-erythritol kinase)	ispE sll0711	P72663	ISPE_SYNY3	isopentenyl diphosphate biosynthetic process, methylerythritol 4-phosphate pathway [GO:0019288];terpenoid biosynthetic process [GO:0016114]		4-(cytidine 5'-diphospho)-2-C-methyl-D-erythritol kinase activity [GO:0050515];ATP binding [GO:0005524]	4-(cytidine 5'-diphospho)-2-C-methyl-D-erythritol kinase activity [GO:0050515];ATP binding [GO:0005524];isopentenyl diphosphate biosynthetic process, methylerythritol 4-phosphate pathway [GO:0019288];terpenoid biosynthetic process [GO:0016114]	315	5	5	5	20.6	34.08	0	35.927	333220000	44	1	0.177787	0.11158	0.908649	-0.0587639	0.497782	0.564005	-0.420395	0.483584	0.552669	-0.410393	0.80697	0.264701	-0.450314		0.141562	0.188395	0.132675	0.166377	0.178962	0.205942	0.193451	0.149715	0.165682	0.197424	0.156875	0.173364	0.135247	0.217989	0.107186	0.0471407	0.117163
LlaI.2 protein	llaI.2	P72665	P72665_SYNY3					462	6	6	6	18	54.094	0	5.3258	1369100000	14	1	2.62006	0.354602	0.559983	1.75885	0.37371	0.588274	1.56946	0.479714	0.470814	2.31959	0.32406	0.510536	1.65595		0.783394	0.0072091	0.00684266	0.00348247	0.00534804	1.11451	0.025989	2.03566		0.00577154	0.802617	0.00839694		0.766855	0.0112043	1.05279	0.0250628
Ribosomal RNA small subunit methyltransferase A (EC 2.1.1.182) (16S rRNA (adenine(1518)-N(6)/adenine(1519)-N(6))-dimethyltransferase) (16S rRNA dimethyladenosine transferase) (16S rRNA dimethylase) (S-adenosylmethionine-6-N', N'-adenosyl(rRNA) dimethyltransferase)	rsmA ksgA sll0708	P72666	RSMA_SYNY3		cytoplasm [GO:0005737]	16S rRNA (adenine(1518)-N(6)/adenine(1519)-N(6))-dimethyltransferase activity [GO:0052908];RNA binding [GO:0003723];rRNA (adenine-N6,N6-)-dimethyltransferase activity [GO:0000179]	16S rRNA (adenine(1518)-N(6)/adenine(1519)-N(6))-dimethyltransferase activity [GO:0052908];cytoplasm [GO:0005737];RNA binding [GO:0003723];rRNA (adenine-N6,N6-)-dimethyltransferase activity [GO:0000179]	284	6	6	6	28.2	31.648	0	16.624	128210000	42	1	0.711747	0.796955	0.303125	1.44172	1.1814	0.410383	1.83033	1.00944	0.264151	1.75029	0.611087	0.275822	1.25723		0.0039329	0.0919845	0.0117603	0.0151633	0.0386316	0.0188017	0.0746995	0.0350241	0.016111	0.0370565	0.0151818	0.0568805	0.0514378	0.0581824	0.142634	0.0825446	0.0712678
Slr0723 protein	slr0723	P72668	P72668_SYNY3					363	7	7	7	24.8	41.429	0	43.888	419130000	90	1	-0.397313	1.2679	0.258424	-0.777204	1.11649	0.387862	-0.686975	1.44413	0.257143	-0.860753	2.1653	0.0348085	-0.991454	+	0.47405	0.292363	0.461362	0.236798	0.188852	0.198348	0.268695	0.355666	0.285229	0.133459	0.246094	0.196089	0.253221	0.128722	0.122963	0.149117	0.144105
Slr0727 protein	slr0727	P72671	P72671_SYNY3					324	9	9	9	34.3	39.2	0	120.04	809140000	81	1	0.851547	1.14122	0.257932	1.11706	0.89117	0.38922	1.09221	1.58402	0.255724	1.44679	1.72339	0.0402247	1.62521	+	0.0852185	0.125846	0.0517202	0.144599	0.425263	0.182328	0.297455	0.352109	0.0970513	0.352055	0.231339	0.201099	0.27042	0.440595	0.295431	0.308687	0.472961
Thylakoid-associated protein slr0729	slr0729	P72673	Y729_SYNY3		thylakoid membrane [GO:0042651]		thylakoid membrane [GO:0042651]	101	5	5	5	80.2	10.946	0	80.759	451900000	57	1	0.460447	0.0517678	0.935933	-0.105044	0.351453	0.663463	0.415565	0.0938964	0.886252	-0.185373	1.00217	0.124462	-1.32759		0.367575	1.19676	0.211858	0.620554	0.210068	1.08276	1.00713	0.813206	0.166338	0.406231	0.788992	0.867346	0.16696	0.481539	0.153434	0.701744	0.528837
Slr0731 protein	slr0731	P72675	P72675_SYNY3					402	18	18	18	44.5	44.716	0	323.31	6657300000	297	1	-0.228293	1.00767	0.376692	-0.300764	1.54722	0.38633	-0.344195	0.362095	0.735765	-0.122693	1.86539	0.143257	-0.302034		4.49559	3.93765	4.6257	3.84965	3.42126	3.49431	3.52529	3.34706	3.52908	3.35979	4.41858	3.40293	3.47153	2.45109	2.97233	3.91311	3.47833
Geranylgeranyl pyrophosphate synthase	crtE	P72683	P72683_SYNY3	isoprenoid biosynthetic process [GO:0008299]	intracellular [GO:0005622]	prenyltransferase activity [GO:0004659]	intracellular [GO:0005622];isoprenoid biosynthetic process [GO:0008299];prenyltransferase activity [GO:0004659]	302	11	11	11	46.4	32.373	0	152.56	3023000000	204	1	0.348847	1.09331	0.323456	0.386196	0.881478	0.450576	0.381945	1.49159	0.258798	0.520327	1.2571	0.16365	0.415246		1.60805	2.05314	1.58378	1.42625	2.8632	2.3089	2.336	1.91918	2.52642	2.73544	2.49404	2.69517	2.18052	2.1273	2.61134	3.18527	2.18131
Slr0740 protein	slr0740	P72684	P72684_SYNY3					131	2	2	2	19.8	14.495	0	16.184	150920000	0	1	0.204787	0.0428845	0.960736	-0.0313038	0.0815389	0.917875	-0.0617546	0.588217	0.584325	-0.206733	0.086193	0.885903	-0.0600743		0.131034	0.137541	0.111528	0.133882	0.133206	0.161926	0.238795	0.215266	0.0836606	0.104674	0.116047	0.156581	0.0662412	0.157555	0.169586	0.118957	0.148691
Ribosome maturation factor RimP	rimP slr0742	P72687	RIMP_SYNY3	ribosomal small subunit assembly [GO:0000028];translation [GO:0006412]	cytosol [GO:0005829]		cytosol [GO:0005829];ribosomal small subunit assembly [GO:0000028];translation [GO:0006412]	151	3	3	3	25.8	16.559	0	186.55	278360000	30	1	1.22977	1.1506	0.220282	1.96524	1.12907	0.414916	1.91739	1.02525	0.261409	1.75399	0.980526	0.118065	1.84507		0.18324	0.398854		0.119206	0.310406	0.200964	0.327336	0.253295	0.18714	0.795355	0.464768	0.434365	0.239396	0.696853	0.942127	0.963941	0.527628
Transcription termination/antitermination protein NusA	nusA	P72688	P72688_SYNY3	DNA-templated transcription, termination [GO:0006353];transcription antitermination [GO:0031564]	cytosol [GO:0005829]	DNA binding transcription factor activity [GO:0003700];RNA binding [GO:0003723]	cytosol [GO:0005829];DNA binding transcription factor activity [GO:0003700];DNA-templated transcription, termination [GO:0006353];RNA binding [GO:0003723];transcription antitermination [GO:0031564]	458	33	33	33	70.3	51.33	0	323.31	14181000000	501	1	0.394967	1.90754	0.200047	0.698296	1.22363	0.384202	0.542945	1.42218	0.262681	0.663787	2.90506	0.0238889	0.883326	+	2.86158	2.43317	2.52445	2.72665	4.79898	3.59329	3.44485	3.44163	3.88225	5.46632	4.49239	3.7099	4.57278	5.71568	5.93848	5.31481	3.86185
Translation initiation factor IF-2	infB slr0744	P72689	IF2_SYNY3		cytoplasm [GO:0005737]	GTP binding [GO:0005525];GTPase activity [GO:0003924];translation initiation factor activity [GO:0003743]	cytoplasm [GO:0005737];GTP binding [GO:0005525];GTPase activity [GO:0003924];translation initiation factor activity [GO:0003743]	1001	55	55	55	61.2	108.12	0	323.31	29938000000	1097	1	0.220407	1.48098	0.274572	0.382276	0.312448	0.744347	0.150605	1.04479	0.377988	0.346167	1.67674	0.0988103	0.474646		3.83044	3.12864	3.5778	2.56246	4.54988	4.00612	3.52334	3.61675	4.115	5.10804	4.72326	4.15624	4.14241	4.93355	4.68709	5.20796	3.2096
Slr0236 protein	slr0236	P72690	P72690_SYNY3					222	6	6	6	40.1	25.007	0	69.235	552740000	71	1	-0.123193	1.21431	0.372978	-0.253924	2.46997	0.440533	-0.549335	0.338362	0.731481	-0.144653	1.31899	0.212386	-0.295434		0.36834	0.389376	0.408716	0.515209	0.456988	0.374622	0.340787	0.538118	0.42931	0.305336	0.314032	0.351155	0.41797	0.321597	0.386193	0.235764	0.330265
Glycogen operon protein GlgX	glgX	P72691	P72691_SYNY3	glycogen catabolic process [GO:0005980]		glycogen debranching enzyme activity [GO:0004133];hydrolase activity, hydrolyzing O-glycosyl compounds [GO:0004553]	glycogen catabolic process [GO:0005980];glycogen debranching enzyme activity [GO:0004133];hydrolase activity, hydrolyzing O-glycosyl compounds [GO:0004553]	746	18	18	18	37.8	83.5	0	167.5	2763700000	223	1	0.264607	0.680795	0.469901	0.296916	1.05938	0.416735	0.410205	1.4925	0.267778	0.468027	1.00621	0.221004	0.408566		0.319217	0.571147	0.504446	0.393062	0.611968	0.625728	0.58053	0.550377	0.507821	0.545167	0.509793	0.46348	0.745496	0.526106	0.668034	0.598996	0.679287
Precorrin methylase	cbiF	P72694	P72694_SYNY3	cobalamin biosynthetic process [GO:0009236];oxidation-reduction process [GO:0055114]		precorrin-4 C11-methyltransferase activity [GO:0046026]	cobalamin biosynthetic process [GO:0009236];oxidation-reduction process [GO:0055114];precorrin-4 C11-methyltransferase activity [GO:0046026]	264	3	3	3	17.8	28.769	0	9.5944	154720000	39	1	0.304087	1.33612	0.218703	1.12688	0.804892	0.417557	0.869045	1.19851	0.259658	1.09603	1.26945	0.0805946	1.25131		0.0123908	0.0588438	0.0550647	0.0565562	0.0625575	0.0438861	0.0357563	0.107179	0.0189113	0.12812	0.072674	0.101361	0.0784802	0.0868715	0.140495	0.138669	0.0811252
Bacterioferritin comigratory protein	bcp	P72697	P72697_SYNY3	cell redox homeostasis [GO:0045454]	cell [GO:0005623]	antioxidant activity [GO:0016209];oxidoreductase activity [GO:0016491]	antioxidant activity [GO:0016209];cell [GO:0005623];cell redox homeostasis [GO:0045454];oxidoreductase activity [GO:0016491]	160	3	3	3	47.5	17.584	0	79.116	512500000	56	1	0.318287	0.672611	0.501267	0.252736	0.411349	0.586512	-0.641005	1.07193	0.367421	0.363847	1.30868	0.150388	0.430686		0.507124	0.30518	0.417854	0.318117	0.443107	0.418705	0.427603	0.448038	0.586699	0.583689	0.472073	0.37756	0.475716	0.622837	0.414457	0.641943	0.371026
Slr0244 protein	slr0244	P72700	P72700_SYNY3	response to stress [GO:0006950]			response to stress [GO:0006950]	284	22	22	22	75.7	31.204	0	323.31	29786000000	568	1	0.034947	0.150217	0.847077	-0.122024	0.966754	0.478077	0.262445	0.196997	0.818724	-0.106193	1.6565	0.0694185	-0.729494		15.7034	18.1882	13.6978	12.9173	12.2527	17.5805	19.5222	15.4474	16.5435	7.96885	17.6596	20.9747	14.0878	12.24	6.35148	18.3031	17.9026
Uncharacterized protein slr0245	slr0245	P72702	Y245_SYNY3			hydrolase activity [GO:0016787]	hydrolase activity [GO:0016787]	304	3	3	3	14.5	33.649	0	5.1306	152310000	17	1	-0.186153	0.130443	0.871666	-0.106304	0.130511	0.868514	-0.109215	0.101846	0.894319	0.0745068	0.042133	0.942483	-0.0386543		0.0460202	0.0689041	0.090796	0.08486	0.0717353	0.0255153	0.0598354	0.0808949	0.0818254	0.0909786	0.044851	0.0403686	0.0847332	0.0822424	0.0961008	0.0439473	0.0423526
Agmatinase 1 (EC 3.5.3.11) (Agmatine ureohydrolase 1) (AUH 1)	speB1 sll0228	P72703	SPEB1_SYNY3	putrescine biosynthetic process [GO:0009446]		agmatinase activity [GO:0008783];metal ion binding [GO:0046872]	agmatinase activity [GO:0008783];metal ion binding [GO:0046872];putrescine biosynthetic process [GO:0009446]	306	6	6	6	16.3	33.463	0	101.4	866050000	135	1	-0.0907731	0.109651	0.890659	0.101056	0.0416629	0.949817	0.0388053	0.196016	0.807172	0.145667	0.292367	0.631183	0.257226		0.638877	0.42849	0.630939	0.323095	0.332615	0.438123	0.471178	0.392345	0.320699	0.521728	0.408578	0.541179	0.268663	0.526727	0.842	0.595848	0.494415
Probable peptidyl-prolyl cis-trans isomerase sll0227 (PPIase sll0227) (EC 5.2.1.8) (Rotamase sll0227)	sll0227	P72704	PPI1_SYNY3	protein folding [GO:0006457]	outer membrane-bounded periplasmic space [GO:0030288]	peptidyl-prolyl cis-trans isomerase activity [GO:0003755]	outer membrane-bounded periplasmic space [GO:0030288];peptidyl-prolyl cis-trans isomerase activity [GO:0003755];protein folding [GO:0006457]	246	8	8	8	31.3	26.58	0	131.6	3742400000	149	1	0.00106704	0.585011	0.552648	-0.221344	0.832802	0.51139	-0.261835	0.232484	0.828594	-0.070113	0.503696	0.563857	-0.158214		4.27644	3.33026	4.59598	3.02939	3.53308	3.68358	3.39272	3.69607	4.7972	3.17327	3.55459	2.47234	3.87923	3.78351	2.52204	3.14491	3.42759
Photosystem I assembly protein Ycf4	ycf4 sll0226	P72705	YCF4_SYNY3	photosynthesis [GO:0015979]	integral component of membrane [GO:0016021];photosystem I [GO:0009522];thylakoid membrane [GO:0042651]		integral component of membrane [GO:0016021];photosynthesis [GO:0015979];photosystem I [GO:0009522];thylakoid membrane [GO:0042651]	188	8	8	8	36.2	20.453	0	323.31	45728000000	195	1	-0.208873	0.349461	0.616815	-0.444884	0.155091	0.827786	-0.256895	0.805621	0.364275	-0.736253	1.68477	0.0417	-1.54289	+	59.8928	110.51	48.8563	112.348	20.2385	42.6806	108.221	38.375	50.8647	39.5408	39.3962	92.6474	26.2924	52.9084	30.987	29.314	76.1459
Sll0224 protein	sll0224	P72707	P72707_SYNY3		outer membrane-bounded periplasmic space [GO:0030288]		outer membrane-bounded periplasmic space [GO:0030288]	298	9	9	9	43	32.829	0	220.92	1977000000	154	1	-0.034533	0.298264	0.724224	-0.165304	0.249943	0.801524	-0.111235	0.354593	0.653954	-0.292553	1.46533	0.0953268	-0.630054		1.08223	0.742022	1.39278	0.942215	0.839049	0.939397	1.06973	1.07892	0.986911	0.733145	1.09603	0.959383	1.00213	0.864793	0.547144	0.944104	0.772065
ABC transporter	slr0251	P72710	P72710_SYNY3	transmembrane transport [GO:0055085]	ATP-binding cassette (ABC) transporter complex [GO:0043190]	ATP binding [GO:0005524];ATPase activity [GO:0016887]	ATP binding [GO:0005524];ATPase activity [GO:0016887];ATP-binding cassette (ABC) transporter complex [GO:0043190];transmembrane transport [GO:0055085]	252	8	8	8	42.9	27.861	0	70.048	732320000	75	1	0.217347	0.294659	0.679729	0.308176	0.215784	0.776146	0.243145	0.109129	0.874156	0.147767	0.047768	0.928232	0.0628458		0.44387	0.531608	0.447039	0.109221	0.461924	0.545672	0.405491	0.390391	0.351231	0.372567	0.438419	0.520323	0.364192	0.544282	0.342457	0.546926	0.513414
Ssl0410 protein	ssl0410	P72713	P72713_SYNY3		integral component of membrane [GO:0016021]		integral component of membrane [GO:0016021]	90	2	2	2	17.8	9.8685	0.0076336	1.6065	25497000	7	1	-0.108298	0.0535424	0.938913	0.0658956	0.259269	0.74765	0.215382	0.756374	0.372354	-0.801153	0.570599	0.33532	-0.755702			0.0436563					0.0457287	0.103055		0.0263559		0.0510296		0.0346771	0.0467527	0.0536424	0.0413891
Slr0254 protein	slr0254	P72718	P72718_SYNY3		integral component of membrane [GO:0016021]		integral component of membrane [GO:0016021]	266	3	3	3	18.8	30.393	0	48.456	72500000	20	1	-0.0518929	0.0621284	0.931498	-0.0695238	0.896472	0.449793	0.374366	0.0395001	0.951492	-0.0599153	0.331012	0.613281	0.216846		0.0549632	0.0714974	0.0695104	0.0333569	0.0506788	0.0124752	0.106346	0.0636098	0.0508747	0.0898505	0.0351333	0.0651622	0.0267609	0.106766	0.0554793	0.0684037	0.0827667
Glutamine--fructose-6-phosphate aminotransferase [isomerizing] (EC 2.6.1.16) (D-fructose-6-phosphate amidotransferase) (GFAT) (Glucosamine-6-phosphate synthase) (Hexosephosphate aminotransferase) (L-glutamine--D-fructose-6-phosphate amidotransferase)	glmS sll0220	P72720	GLMS_SYNY3	fructose 6-phosphate metabolic process [GO:0006002];glutamine metabolic process [GO:0006541];protein N-linked glycosylation [GO:0006487];UDP-N-acetylglucosamine metabolic process [GO:0006047]	cytosol [GO:0005829]	carbohydrate derivative binding [GO:0097367];glutamine-fructose-6-phosphate transaminase (isomerizing) activity [GO:0004360]	carbohydrate derivative binding [GO:0097367];cytosol [GO:0005829];fructose 6-phosphate metabolic process [GO:0006002];glutamine metabolic process [GO:0006541];glutamine-fructose-6-phosphate transaminase (isomerizing) activity [GO:0004360];protein N-linked glycosylation [GO:0006487];UDP-N-acetylglucosamine metabolic process [GO:0006047]	631	14	14	14	26.8	69.606	0	171.82	2556100000	174	1	-0.154533	0.454001	0.617208	-0.215364	0.430561	0.665163	-0.210215	0.169696	0.839289	-0.0966931	0.0532196	0.941387	-0.0248943		0.870858	0.769895	0.844443	0.755304	0.466461	0.770522	0.828999	0.652384	0.714988	0.391877	0.685763	0.746585	0.723303	0.589076	0.433497	0.621712	0.547145
Sll0216 protein	sll0216	P72724	P72724_SYNY3			double-stranded RNA binding [GO:0003725]	double-stranded RNA binding [GO:0003725]	210	6	6	6	35.7	23.86	0	24.768	193630000	34	1	0.322807	0.106949	0.898831	-0.0878239	0.121796	0.878728	0.0990054	0.105911	0.89109	-0.0913931	0.296926	0.631563	-0.246834		0.181106	0.189587	0.199751	0.0886662	0.129043	0.187558	0.261022	0.174245	0.192175	0.14653	0.154404	0.224001	0.0937376	0.116728	0.152946	0.157926	0.204631
Putative nickel insertion protein	slr1411	P72725	Y1411_SYNY3					422	3	3	3	8.5	45.731	0	3.5129	117010000	22	1	-0.00113306	0.107229	0.893946	0.0998961	0.179826	0.839731	0.108765	1.40367	0.260495	0.648147	0.810977	0.256445	0.471186		0.0400518	0.041655	0.0270032	0.0430193	0.0613551	0.0422504	0.0459734	0.0326741	0.0335997	0.0555439	0.036066	0.0327101	0.0594851	0.0285479	0.0839104	0.0496011	0.0428279
Sensory transduction histidine kinase	slr1414	P72728	P72728_SYNY3		intracellular [GO:0005622]	ATP binding [GO:0005524];phosphorelay sensor kinase activity [GO:0000155]	ATP binding [GO:0005524];intracellular [GO:0005622];phosphorelay sensor kinase activity [GO:0000155]	437	8	8	8	27.9	47.992	0	25.488	755720000	93	1	-0.010293	0.229418	0.765127	-0.166524	0.358627	0.675202	-0.260535	0.0861521	0.912281	-0.065573	0.433963	0.536747	-0.231914		0.516847	0.432369	0.261915	0.394208	0.228003	0.443992	0.4145	0.31725	0.366908	0.236969	0.397681	0.381744	0.346463	0.188682	0.297651	0.258407	0.243889
MorR protein	morR	P72730	P72730_SYNY3		cell wall [GO:0005618]	ATP binding [GO:0005524];ATPase activity [GO:0016887]	ATP binding [GO:0005524];ATPase activity [GO:0016887];cell wall [GO:0005618]	314	9	9	9	36.9	35.091	0	146.21	1149200000	157	1	-0.069573	0.273042	0.756334	0.133656	0.416162	0.676922	0.187605	0.0358272	0.962345	0.0263069	0.31623	0.67461	-0.142454		0.731084	0.742228	0.658918	0.511473	0.506743	0.693471	0.753376	0.458754	0.544495	0.557975	0.748868	0.785062	0.501796	0.919567	0.542875	0.872192	0.736161
ABC transporter	sll1041	P72734	P72734_SYNY3			ATP binding [GO:0005524];ATPase activity [GO:0016887]	ATP binding [GO:0005524];ATPase activity [GO:0016887]	260	3	3	3	14.6	28.656	0	4.8307	121500000	17	1	-0.0878531	0.226765	0.774251	-0.139664	0.534472	0.549886	-0.428115	0.599205	0.49808	-0.370493	0.315852	0.639106	-0.190954		0.0788421	0.0739572	0.0753197	0.0353984	0.0601049	0.0723485	0.0705037	0.0634249	0.0521855	0.0408186	0.0616944	0.0675163	0.0560933	0.0614529	0.0401069	0.0214886	0.0558613
Sll1039 protein	sll1039	P72738	P72738_SYNY3					379	5	5	5	18.7	43.883	0	8.8446	372660000	17	1	-0.370433	0.182605	0.891978	0.0451762	0.562145	0.62606	0.196205	1.20543	0.46048	0.190967	0.992062	0.205222	-0.463934		0.22286	0.200244	0.192092	0.176731	0.180282	0.217157	0.23159	0.222997	0.0451507	0.149402	0.205482	0.23478	0.186013	0.208082	0.171062	0.178466	0.330242
Dihydrolipoyl dehydrogenase (EC 1.8.1.4) (Dihydrolipoamide dehydrogenase) (LPD) (E3 component of pyruvate complex)	lpdA pdhD slr1096	P72740	DLDH_SYNY3	cell redox homeostasis [GO:0045454];glycolytic process [GO:0006096]	plasma membrane [GO:0005886]	dihydrolipoyl dehydrogenase activity [GO:0004148];electron transfer activity [GO:0009055];flavin adenine dinucleotide binding [GO:0050660]	cell redox homeostasis [GO:0045454];dihydrolipoyl dehydrogenase activity [GO:0004148];electron transfer activity [GO:0009055];flavin adenine dinucleotide binding [GO:0050660];glycolytic process [GO:0006096];plasma membrane [GO:0005886]	474	24	24	24	52.7	50.832	0	323.31	20842000000	511	1	-0.0853731	1.1872	0.376641	-0.251144	1.17046	0.581695	-0.132675	0.889992	0.608201	-0.125693	0.957156	0.351313	-0.223474		7.89538	7.00038	8.09916	8.25306	7.34431	8.22039	6.54886	7.12798	8.27863	6.35359	7.1502	5.96523	7.68781	6.88533	5.03291	6.72212	6.5814
Slr1097 protein	slr1097	P72741	P72741_SYNY3					163	11	11	11	50.9	19.003	0	67.336	2710400000	145	1	0.117047	0.240064	0.747056	0.217536	0.0964254	0.898184	0.100525	0.0237968	0.975643	-0.0262931	0.571063	0.377921	-0.475914		2.26076	2.31664	0.877744	1.36815	2.07445	2.76831	2.61832	2.15172	0.730467	1.71817	2.75067	2.2208	1.26074	2.80816	1.28217	2.41332	2.56987
Slr1098 protein	slr1098	P72742	P72742_SYNY3	iron-sulfur cluster assembly [GO:0016226]			iron-sulfur cluster assembly [GO:0016226]	252	6	6	6	28.6	27.675	0	26.057	437980000	108	1	-0.124773	0.572256	0.714211	-0.0893638	0.562732	0.633129	-0.186515	1.22316	0.45961	-0.188113	1.07858	0.283897	-0.260634		0.274164	0.278169	0.292452	0.280881	0.333146	0.234232	0.236112	0.379216	0.290799	0.222068	0.266532	0.303019	0.270139	0.289358	0.24254	0.327239	0.184615
Flavin prenyltransferase UbiX (EC 2.5.1.129)	ubiX slr1099	P72743	UBIX_SYNY3	coenzyme biosynthetic process [GO:0009108]		carboxy-lyase activity [GO:0016831];prenyltransferase activity [GO:0004659]	carboxy-lyase activity [GO:0016831];coenzyme biosynthetic process [GO:0009108];prenyltransferase activity [GO:0004659]	206	3	3	3	16	22.172	0	9.2687	95315000	17	1	0.480052	0.379345	0.578448	0.537101	0.0676032	0.916845	0.11659	0.31538	0.648904	0.529372	0.792642	0.188954	1.1971		0.0514783	0.0312637	0.060036			0.0391297	0.025713	0.0358196	0.0358991	0.074221	0.0569044	0.0254812	0.0536035	0.0506612	0.0297182	0.0358426	0.0486133
Slr1102 protein	slr1102	P72746	P72746_SYNY3					853	17	17	17	22.3	96.638	0	100.98	2163100000	181	1	-0.040813	0.377411	0.723309	0.117696	0.0836321	0.928263	-0.0357747	0.0616171	0.950385	0.0247469	0.502284	0.565948	0.156806		0.407963	0.34797	0.267326	0.268767	0.382499	0.315762	0.349761	0.27063	0.362008	0.313008	0.352082	0.313466	0.386857	0.361515	0.380058	0.355277	0.331365
Slr1103 protein	slr1103	P72747	P72747_SYNY3					706	24	24	24	40.4	79.83	0	323.31	4038400000	290	1	-0.319493	2.19125	0.201641	-0.574384	1.04182	0.398738	-0.556575	1.81722	0.252958	-0.517413	2.39631	0.036703	-0.706514	+	1.35323	1.18529	1.28929	1.11979	0.751543	0.949808	1.14595	0.929092	1.15668	0.491673	0.73585	0.822666	0.742762	0.681755	0.775551	0.818536	0.50031
Slr1104 protein	slr1104	P72748	P72748_SYNY3					613	13	13	13	26.9	69.333	0	256.74	2435200000	185	1	-0.181353	0.39735	0.625455	-0.240944	0.495022	0.587384	-0.325255	0.485911	0.573339	-0.324573	0.489748	0.474348	-0.295454		1.46186	0.64293	1.05692	0.873288	0.523996	0.728604	0.825101	0.800123	0.744989	0.676598	0.691443	0.632869	0.866861	0.737301	0.705145	0.532265	0.621788
GTP-binding protein TypA/BipA homolog	typA slr1105	P72749	TYPA_SYNY3			GTP binding [GO:0005525];GTPase activity [GO:0003924]	GTP binding [GO:0005525];GTPase activity [GO:0003924]	597	25	25	25	53.3	66.012	0	323.31	15823000000	521	1	0.344667	1.77865	0.195918	0.756956	1.20079	0.396505	0.635245	1.2938	0.256826	0.733387	2.46973	0.0255422	1.14851	+	1.81015	1.95644	1.6443	1.71955	3.31872	2.56366	2.23309	2.13597	1.69912	5.28122	3.49449	2.61821	2.58645	4.32028	4.47998	3.99312	3.30923
Sll1036 protein	sll1036	P72751	P72751_SYNY3					292	2	2	2	8.6	32.623	0.0026483	2.1637	116460000	8	1	-0.371373	0.811875	0.302101	-1.28872	1.00284	0.380876	-0.950895	0.793018	0.359486	-0.858818	0.274403	0.636664	-0.292954		0.176741	0.139142	0.124005	0.127815	0.0386477	0.0963085	0.121123	0.0635525	0.121203	0.0462844		0.0839561	0.0798464	0.0680635	0.0628254	0.0393912	0.0971592
Uracil phosphoribosyltransferase (EC 2.4.2.9) (UMP pyrophosphorylase) (UPRTase)	upp sll1035	P72753	UPP_SYNY3	pyrimidine nucleobase metabolic process [GO:0006206];pyrimidine nucleoside salvage [GO:0043097];UMP salvage [GO:0044206];uracil salvage [GO:0006223]	cytosol [GO:0005829]	GTP binding [GO:0005525];uracil phosphoribosyltransferase activity [GO:0004845];uridine kinase activity [GO:0004849]	cytosol [GO:0005829];GTP binding [GO:0005525];pyrimidine nucleobase metabolic process [GO:0006206];pyrimidine nucleoside salvage [GO:0043097];UMP salvage [GO:0044206];uracil phosphoribosyltransferase activity [GO:0004845];uracil salvage [GO:0006223];uridine kinase activity [GO:0004849]	216	9	9	9	55.1	23.637	0	114.37	1858500000	224	1	-0.103393	0.08917	0.926908	0.0364561	0.198443	0.848769	-0.0781546	0.356847	0.756469	-0.104093	1.17448	0.244403	-0.287034		0.725582	0.925904	0.780717	0.968772	1.12641	0.916754	0.890349	0.823644	0.926133	0.642412	0.934705	1.11287	0.90192	0.952985	0.726378	0.903388	0.872661
Prohibitin	phb	P72754	P72754_SYNY3		integral component of membrane [GO:0016021]		integral component of membrane [GO:0016021]	282	16	16	16	46.1	30.569	0	298.85	4504600000	302	1	-0.251193	1.90846	0.21932	-0.491004	0.67256	0.531766	-0.298455	1.53178	0.273977	-0.425793	2.29226	0.0410217	-0.695014	+	3.02055	2.32501	2.52989	2.94084	1.99063	2.5781	2.17037	2.12814	2.58183	1.41654	2.06907	2.09577	1.84238	1.67612	1.41656	2.16403	1.61473
Sll1033 protein	sll1033	P72756	P72756_SYNY3			protein serine/threonine phosphatase activity [GO:0004722]	protein serine/threonine phosphatase activity [GO:0004722]	668	14	14	14	25.4	73.711	0	323.31	5453500000	244	1	0.048007	0.10154	0.921395	0.0380562	0.024577	0.982728	-0.00823458	0.223348	0.820318	0.0854669	0.036556	0.957658	-0.0161742		2.07327	1.95197	1.86642	1.5911	1.87076	2.41163	2.27402	1.29441	2.09739	1.78345	2.46345	1.68317	1.56805	2.22149	1.77608	2.35237	1.64079
CcmN protein	ccmN	P72757	P72757_SYNY3					241	2	2	2	15.4	25.057	0	55.702	376690000	67	1	-0.272673	0.286738	0.777709	-0.0940839	0.317438	0.670417	-0.457675	0.833641	0.412784	-0.388193	0.164614	0.810504	0.0822657		0.367218	0.326767	0.492355	0.365116	0.322557	0.406241	0.160778	0.336317	0.348515	0.353252	0.333274	0.366244	0.29005	0.414811	0.341958	0.454269	0.0529581
Carbon dioxide concentrating mechanism protein CcmM	ccmM	P72758	P72758_SYNY3					687	41	41	41	58.4	73.12	0	323.31	158880000000	1252	1	-0.046313	0.552019	0.721697	-0.0879239	0.332663	0.78857	-0.0916347	0.129689	0.919042	-0.0279131	0.0147992	0.986238	0.00532579		29.8056	25.4701	32.561	32.1741	31.8567	29.8055	24.8236	26.8322	34.4562	31.5457	29.6422	26.158	29.3049	29.9883	27.415	30.8162	22.549
Carbon dioxide concentrating mechanism protein CcmL	ccmL sll1030	P72759	CCML_SYNY3					100	4	4	4	46	10.638	0	23.64	615690000	43	1	-0.029613	0.966629	0.521815	0.156676	0.884249	0.527101	0.221465	0.261571	0.796686	0.100467	0.309288	0.730946	0.0928458		0.762183	0.964755	0.760949	0.76468	0.851706	0.711239	0.799042	0.885641	0.739895	0.883114	0.899679	1.05598	0.857835	0.876986	0.877574	1.05762	0.987391
Carbon dioxide-concentrating mechanism protein CcmK homolog 1	ccmK1 sll1029	P72760	CCMK1_SYNY3					111	13	13	11	91.9	12.102	0	323.31	70951000000	410	1	0.014227	0.544128	0.604398	0.179156	0.760985	0.559411	0.203505	0.328861	0.733141	0.143007	0.0113556	0.988583	0.00422573		68.2903	70.5432	58.4314	57.2272	90.0483	78.5537	65.66	61.1421	64.1551	75.3205	87.9665	77.3795	64.6318	92.2659	66.4913	88.5069	78.1944
Carbon dioxide-concentrating mechanism protein CcmK homolog 2	ccmK2 sll1028	P72761	CCMK2_SYNY3					103	9	7	7	80.6	11.135	0	323.31	39987000000	347	1	-0.0723531	0.1217	0.917287	0.0400762	0.761823	0.604324	0.159025	0.182633	0.863389	0.0592669	0.730589	0.404273	-0.239714		43.2674	37.9186	39.2514	37.9605	47.2659	47.5017	40.7024	36.1668	31.7194	40.5399	43.8524	36.6179	41.1486	54.8959	36.6005	47.8888	37.0806
NADH-glutamate synthase small subunit	gltD	P72762	P72762_SYNY3	glutamate biosynthetic process [GO:0006537]		iron-sulfur cluster binding [GO:0051536];oxidoreductase activity, acting on the CH-NH2 group of donors, NAD or NADP as acceptor [GO:0016639]	glutamate biosynthetic process [GO:0006537];iron-sulfur cluster binding [GO:0051536];oxidoreductase activity, acting on the CH-NH2 group of donors, NAD or NADP as acceptor [GO:0016639]	494	20	20	20	53.6	54.144	0	323.31	6979400000	330	1	0.092387	0.428336	0.767298	-0.0742238	0.210502	0.903053	0.0322254	1.01327	0.597747	0.122827	0.235252	0.844711	0.0389058		1.60615	1.52566	1.74493	1.83939	1.7963	1.77204	1.94658	1.70219	2.01195	1.64726	1.7275	1.83284	1.51306	1.53989	1.48071	1.81959	1.71439
Erythroid ankyrin	ank	P72763	P72763_SYNY3					441	3	3	3	8.6	46.817	0	21.092	263070000	60	1	0.227927	0.571058	0.493766	-0.356644	0.555925	0.55653	0.346525	0.143393	0.843535	0.140487	0.112419	0.854367	-0.0814142		0.122624	0.124096	0.15837	0.159511	0.0630931	0.197922	0.127869	0.110912	0.148249	0.128414	0.0870195	0.067746	0.139523	0.102872	0.0832788	0.130635	0.163277
Slr1110 protein	slr1110	P72764	P72764_SYNY3			RNA binding [GO:0003723]	RNA binding [GO:0003723]	192	3	3	3	22.9	21.664	0	12.347	66381000	18	1	0.965787	1.02949	0.254061	1.26462	2.59618	0.472	1.85417	0.75386	0.37296	0.813307	2.06645	0.0266667	1.75213	+	0.0129134	0.0257253	0.0157541	0.0172774	0.0220883	0.0491184	0.026308	0.0902514	0.0129967	0.0374516	0.0184145	0.0717926	0.0156431	0.172962	0.0447054	0.0932416	0.0699416
Slr1772 protein	slr1772	P72765	P72765_SYNY3		integral component of membrane [GO:0016021];outer membrane-bounded periplasmic space [GO:0030288]		integral component of membrane [GO:0016021];outer membrane-bounded periplasmic space [GO:0030288]	377	3	3	3	13	41.664	0	25.873	231790000	55	1	-0.222533	0.256875	0.706723	-0.344964	0.628933	0.478118	-0.655215	0.337837	0.658231	-0.318613	0.00328139	0.994175	0.00438576		0.189979	0.0903228	0.11704	0.0618119	0.0635012	0.0629307	0.155269	0.104559	0.0628298	0.0567896	0.0881792	0.0211585	0.0984662	0.136543	0.0950739	0.0773003	0.0709081
Magnesium-chelatase subunit ChlD (Mg-chelatase subunit D) (EC 6.6.1.1) (Mg-protoporphyrin IX chelatase)	chlD slr1777	P72772	CHLD_SYNY3	chlorophyll biosynthetic process [GO:0015995];photosynthesis [GO:0015979]		ATP binding [GO:0005524];magnesium chelatase activity [GO:0016851]	ATP binding [GO:0005524];chlorophyll biosynthetic process [GO:0015995];magnesium chelatase activity [GO:0016851];photosynthesis [GO:0015979]	676	18	18	18	36.8	73.665	0	167.97	2098800000	241	1	0.113147	0.895026	0.40343	0.306516	0.84415	0.477731	0.316965	0.827599	0.435865	0.321487	0.538644	0.496217	0.217366		0.301579	0.342158	0.284238	0.340099	0.560827	0.441109	0.349713	0.394089	0.357172	0.381346	0.454447	0.427702	0.393728	0.484956	0.436088	0.516098	0.434008
Alanine dehydrogenase (EC 1.4.1.1)	sll1682	P72775	P72775_SYNY3	L-alanine catabolic process [GO:0042853]		alanine dehydrogenase activity [GO:0000286]	alanine dehydrogenase activity [GO:0000286];L-alanine catabolic process [GO:0042853]	360	11	11	11	42.8	38.267	0	42.757	1862300000	122	1	-0.193373	0.348243	0.619617	-0.393324	0.071218	0.916304	-0.0793346	0.053421	0.944057	-0.0624531	0.0446731	0.934148	-0.0527343		0.842711	0.94248	1.31537	0.917213	0.272802	0.753149	0.68603	0.807253	0.575262	0.557395	0.61267	0.710585	1.00561	0.552377	0.276565	0.656386	0.563659
Pyridoxine 5'-phosphate synthase (PNP synthase) (EC 2.6.99.2)	pdxJ slr1779	P72776	PDXJ_SYNY3	pyridoxine biosynthetic process [GO:0008615]	cytosol [GO:0005829]	pyridoxine 5'-phosphate synthase activity [GO:0033856]	cytosol [GO:0005829];pyridoxine 5'-phosphate synthase activity [GO:0033856];pyridoxine biosynthetic process [GO:0008615]	242	10	10	10	58.3	26.518	0	95.369	2130300000	69	1	0.671687	0.610822	0.414859	0.693856	0.426121	0.587395	0.570145	0.776663	0.366463	0.824887	0.366994	0.509207	0.539706		1.29469	1.08563	0.183261	1.1257	0.428102	1.00466	0.983463	0.928963	1.34741	1.02945	0.946243	0.868007	1.29197	1.26035	1.02797	1.18906	1.0856
Ycf54-like protein	slr1780	P72777	YC54L_SYNY3					133	8	8	8	65.4	15.456	0	166.82	4846500000	145	1	0.132447	0.795987	0.422969	0.308996	0.676772	0.526663	0.321705	0.404137	0.668616	0.183567	0.152685	0.816818	0.0820458		5.27916	5.04143	3.19845	3.31757	5.84388	5.60186	5.57759	5.4155	4.21634	3.66083	6.55312	5.60331	4.93918	5.6648	4.68742	7.60431	3.95504
Sll1680 protein	sll1680	P72779	P72779_SYNY3			peptide-methionine (R)-S-oxide reductase activity [GO:0033743]	peptide-methionine (R)-S-oxide reductase activity [GO:0033743]	176	2	2	2	25.6	19.661	0	46.549	221520000	41	1	0.269067	0.885055	0.327014	0.583816	1.07705	0.390116	0.574385	0.662788	0.459152	0.414327	0.901195	0.196041	0.638906		0.134242	0.133993	0.0601985	0.0800435	0.162007	0.0971533	0.196301	0.123801	0.107663	0.140357	0.134026	0.13084	0.113288	0.226177	0.236366	0.193341	0.18427
Putative serine protease HhoA	hhoA sll1679	P72780	HHOA_SYNY3		outer membrane-bounded periplasmic space [GO:0030288]	identical protein binding [GO:0042802];serine-type endopeptidase activity [GO:0004252]	identical protein binding [GO:0042802];outer membrane-bounded periplasmic space [GO:0030288];serine-type endopeptidase activity [GO:0004252]	394	13	13	13	40.6	41.336	0	168.1	1704400000	177	1	0.00938702	0.0341895	0.964505	0.0296762	0.152041	0.851693	0.120625	0.941384	0.349025	0.544707	0.286842	0.65102	0.214006		1.30795	0.649425	0.602976	0.400154	0.629958	0.586664	0.894121	0.537186	0.511956	0.924581	0.848498	0.593565	0.587016	0.583994	0.828798	0.990012	0.598073
NarL subfamily	slr1783	P72781	P72781_SYNY3	phosphorelay signal transduction system [GO:0000160];regulation of transcription, DNA-templated [GO:0006355];transcription, DNA-templated [GO:0006351]	intracellular [GO:0005622]	DNA binding [GO:0003677]	DNA binding [GO:0003677];intracellular [GO:0005622];phosphorelay signal transduction system [GO:0000160];regulation of transcription, DNA-templated [GO:0006355];transcription, DNA-templated [GO:0006351]	282	7	7	7	28.4	31.395	0	127.82	1542400000	138	1	0.172707	0.0672955	0.930453	-0.0560238	0.0810536	0.916728	0.0662054	0.234922	0.76912	-0.184173	0.544825	0.421892	-0.370654		1.11706	1.01927	1.12793	0.432877	0.723983	1.05475	0.968446	1.09126	0.93109	0.705575	0.984104	0.875318	0.788931	0.88223	0.552824	0.809732	1.0832
Biliverdin reductase	bvdR	P72782	P72782_SYNY3			nucleotide binding [GO:0000166];oxidoreductase activity [GO:0016491]	nucleotide binding [GO:0000166];oxidoreductase activity [GO:0016491]	328	10	10	10	36.6	36.64	0	196.21	1571700000	145	1	-0.307473	0.822815	0.41776	-0.306184	0.662275	0.593596	-0.189515	0.783887	0.500958	-0.231233	0.638651	0.451282	-0.223274		0.865922	0.61931	0.698519	0.840622	0.536975	0.655609	0.663396	0.4283	0.647114	0.48326	0.594638	0.430797	0.706309	0.681992	0.474208	0.636758	0.688531
4-alpha-glucanotransferase (EC 2.4.1.25) (Amylomaltase) (Disproportionating enzyme) (D-enzyme)	malQ sll1676	P72785	MALQ_SYNY3		cytoplasm [GO:0005737]	4-alpha-glucanotransferase activity [GO:0004134];beta-maltose 4-alpha-glucanotransferase activity [GO:0102500]	4-alpha-glucanotransferase activity [GO:0004134];beta-maltose 4-alpha-glucanotransferase activity [GO:0102500];cytoplasm [GO:0005737]	505	14	14	14	35.2	57.18	0	110.25	2442500000	148	1	0.558787	2.04424	0.2088	1.0371	1.75688	0.412186	0.876645	1.7983	0.275184	1.00651	1.8059	0.0450216	0.982986	+	0.371056	0.518004	0.328684	0.477022	0.844534	0.899445	0.676163	0.643982	0.395868	1.13845	1.01114	0.784953	0.688902	1.20692	1.40346	1.15166	1.13618
Slr1788 protein	slr1788	P72788	P72788_SYNY3					351	10	10	10	32.5	41.254	0	45.64	511320000	70	1	1.00974	0.76979	0.301869	2.04819	0.514659	0.502605	1.57933	1.0549	0.260344	2.50958	0.855261	0.146378	2.18834		0.51214		0.00924553		0.046783	0.0101127	0.615633	0.117017		0.0412081	0.0418271	0.0309714	0.17751	0.308304	0.201869	0.132578	0.543516
Regulatory components of sensory transduction system	sll1673	P72790	P72790_SYNY3	phosphorelay signal transduction system [GO:0000160]	intracellular [GO:0005622]		intracellular [GO:0005622];phosphorelay signal transduction system [GO:0000160]	452	7	7	7	21.5	51.309	0	21.048	236810000	78	1	0.313447	0.437912	0.561093	-0.392924	0.770245	0.419933	-0.887795	0.0230741	0.975347	-0.0289331	0.805582	0.230637	-0.639934		0.1048	0.147249	0.0814169	0.0694505	0.0365351	0.129705	0.157099	0.12405	0.0732053	0.0510541	0.0682647	0.094449	0.0376338	0.0471573	0.0713814	0.0455065	0.0167987
Hybrid sensory kinase	sll1672	P72791	P72791_SYNY3		integral component of membrane [GO:0016021];intracellular [GO:0005622]	phosphorelay sensor kinase activity [GO:0000155]	integral component of membrane [GO:0016021];intracellular [GO:0005622];phosphorelay sensor kinase activity [GO:0000155]	834	3	3	3	3.8	94.098	0.0015991	2.2355	675280000	7	1	0.284167	0.401458	0.580797	0.406616	0.268929	0.743976	0.214605	0.0300957	0.968452	-0.0235531	0.51806	0.503556	-0.219494		0.0941373	0.113388	0.156786	0.135431	0.118374	0.209411	0.0595747	0.163017	0.216763	0.162947	0.436206	0.240445	0.116393	0.103473	0.0869297	0.138842	0.0618361
UPF0093 membrane protein slr1790	slr1790	P72793	Y1790_SYNY3		integral component of membrane [GO:0016021];plasma membrane [GO:0005886]		integral component of membrane [GO:0016021];plasma membrane [GO:0005886]	210	2	2	2	11.4	24.063	0	19.221	307160000	27	1	-0.680533	0.148727	0.860041	-0.0998439	0.931197	0.398827	-1.84395	0.303951	0.650832	-0.629013	0.422422	0.568124	0.196626		0.179818	0.161022	0.221299	0.206073	0.31224	0.191353	0.0225871	0.160327	0.19956	0.281923	0.201504	0.155758	0.132335	0.267948	0.262101
Phosphoadenosine phosphosulfate reductase (EC 1.8.4.8) (3'-phosphoadenylylsulfate reductase) (PAPS reductase, thioredoxin dependent) (PAPS sulfotransferase) (PAdoPS reductase)	cysH slr1791	P72794	CYSH_SYNY3	hydrogen sulfide biosynthetic process [GO:0070814];sulfate assimilation, phosphoadenylyl sulfate reduction by phosphoadenylyl-sulfate reductase (thioredoxin) [GO:0019379]	cytoplasm [GO:0005737]	phosphoadenylyl-sulfate reductase (thioredoxin) activity [GO:0004604]	cytoplasm [GO:0005737];hydrogen sulfide biosynthetic process [GO:0070814];phosphoadenylyl-sulfate reductase (thioredoxin) activity [GO:0004604];sulfate assimilation, phosphoadenylyl sulfate reduction by phosphoadenylyl-sulfate reductase (thioredoxin) [GO:0019379]	249	5	5	5	14.5	28.468	0	17.919	310910000	32	1	0.561927	1.51008	0.204148	1.44298	1.6411	0.462519	1.51561	0.686565	0.391506	0.898587	1.01037	0.126702	1.17959		0.0318494	0.220635	0.180638	0.0629011	0.166955	0.230735	0.202605	0.278335	0.0233197	0.308015	0.23781	0.261898	0.252083	0.400487	0.31495	0.315326	0.262028
Shikimate kinase (SK) (EC 2.7.1.71)	aroK sll1669	P72796	AROK_SYNY3	aromatic amino acid family biosynthetic process [GO:0009073];chorismate biosynthetic process [GO:0009423];shikimate metabolic process [GO:0019632]	cytoplasm [GO:0005737]	ATP binding [GO:0005524];magnesium ion binding [GO:0000287];shikimate kinase activity [GO:0004765]	aromatic amino acid family biosynthetic process [GO:0009073];ATP binding [GO:0005524];chorismate biosynthetic process [GO:0009423];cytoplasm [GO:0005737];magnesium ion binding [GO:0000287];shikimate kinase activity [GO:0004765];shikimate metabolic process [GO:0019632]	189	6	6	6	55	20.697	0	49.962	628260000	33	1	0.406267	1.0777	0.277731	0.629196	1.10725	0.378532	0.614925	1.27982	0.256474	0.763587	1.23466	0.0989448	0.955866		0.183152	0.256412	0.151835	0.119404	0.284801	0.270052	0.258358	0.218483	0.16988	0.382776	0.251928	0.290615	0.181403	0.393852	0.41034	0.276935	0.380269
Transaldolase (EC 2.2.1.2)	tal talB slr1793	P72797	TAL_SYNY3	carbohydrate metabolic process [GO:0005975];pentose-phosphate shunt [GO:0006098]	cytoplasm [GO:0005737]	calcium ion binding [GO:0005509];sedoheptulose-7-phosphate:D-glyceraldehyde-3-phosphate glyceronetransferase activity [GO:0004801]	calcium ion binding [GO:0005509];carbohydrate metabolic process [GO:0005975];cytoplasm [GO:0005737];pentose-phosphate shunt [GO:0006098];sedoheptulose-7-phosphate:D-glyceraldehyde-3-phosphate glyceronetransferase activity [GO:0004801]	391	29	29	29	72.6	43.105	0	323.31	25021000000	497	1	-0.00853291	0.130819	0.91622	-0.0403638	0.098241	0.916986	-0.0424545	0.0517096	0.960182	-0.017933	0.126001	0.875115	-0.0409542		8.36294	8.11806	7.95616	8.2342	5.78544	8.66024	8.13557	8.04612	6.22033	7.08452	6.42449	7.75152	8.32512	7.33616	7.35585	6.22346	8.03442
Ssr2998 protein	ssr2998	P72798	P72798_SYNY3					65	6	6	6	70.8	7.2203	0	317.96	5012700000	90	1	-0.033033	0.114653	0.901927	-0.0698038	0.298793	0.754558	-0.141995	0.415349	0.639941	-0.235073	0.624556	0.40094	-0.315694		13.8116	11.4791	8.14589	6.66973	11.2842	12.5551	9.64006	9.22528	14.6212	5.30985	9.23866	9.34749	11.1585	11.4068	6.94268	10.6252	8.61227
Slr1794 protein	slr1794	P72799	P72799_SYNY3					362	14	14	14	43.9	39.139	0	323.31	4281800000	229	1	-0.201053	0.99343	0.379848	-0.301224	0.941479	0.469127	-0.287715	0.241881	0.806809	-0.098413	0.116126	0.864164	0.0594058		2.40762	1.67787	2.97785	1.90981	1.80641	1.92	1.70934	1.61563	2.03269	1.91822	1.68434	1.52867	1.62256	1.83811	1.90263	1.81443	1.75832
Peptide methionine sulfoxide reductase MsrA 2 (Protein-methionine-S-oxide reductase 2) (EC 1.8.4.11) (Peptide-methionine (S)-S-oxide reductase 2) (Peptide Met(O) reductase 2)	msrA2 slr1795	P72800	MSRA2_SYNY3			peptide-methionine (S)-S-oxide reductase activity [GO:0008113]	peptide-methionine (S)-S-oxide reductase activity [GO:0008113]	214	5	5	5	36	23.605	0	123.94	791320000	100	1	0.651827	1.08499	0.250628	1.14678	0.0890348	0.893969	0.195165	0.649609	0.422507	0.725027	1.51716	0.0524567	1.44523		0.903508	0.244776	0.145649	0.206789	0.310642	0.991584	1.03458	0.175603	0.151984	0.723553	0.895821	1.09488	0.255762	0.571183	0.76854	0.997658	0.10552
DnaJ protein	dnaJ	P72803	P72803_SYNY3		integral component of membrane [GO:0016021]		integral component of membrane [GO:0016021]	174	2	2	2	14.4	19.03	0	7.0967	132610000	10	1	0.264907	0.543579	0.550026	0.254556	0.0778845	0.90689	-0.147965	0.241007	0.81342	0.0828069	1.90332	0.0448789	0.880966	+	0.115024	0.0944002	0.0793169	0.0687989	0.0921755	0.0685503	0.110059	0.166027	0.0722976	0.151047	0.0656383	0.113218	0.136632	0.103825	0.125181	0.100302	0.184168
Thylakoid membrane protein slr1796	slr1796	P72804	Y1796_SYNY3		integral component of membrane [GO:0016021];thylakoid membrane [GO:0042651]		integral component of membrane [GO:0016021];thylakoid membrane [GO:0042651]	201	9	9	9	44.8	22.968	0	48.647	2643600000	149	1	-0.111553	1.45645	0.222797	-0.793704	0.486292	0.588095	-0.348475	0.273159	0.735953	-0.194093	1.52984	0.0684531	-0.919514		3.02264	1.22182	2.42817	2.43265	2.04802	3.13857	1.0173	2.11579	3.1188	1.4406	1.08139	1.13279	2.18688	1.22376	0.870546	2.50276	1.13492
Sll1665 protein	sll1665	P72805	P72805_SYNY3					589	10	10	10	17.5	63.607	0	323.31	3127700000	127	1	0.485327	0.375098	0.587783	0.471976	0.432543	0.59027	0.470965	0.0420291	0.949227	0.0645869	0.405617	0.497591	-0.420134		2.40179	6.15447	1.2834	1.26333	2.21503	4.57067	6.41675	3.82535	1.78348	1.42639	3.91926	4.9891	1.66229	5.1001	1.64387	4.17425	3.11967
Sll1663 protein	sll1663	P72807	P72807_SYNY3					220	9	9	9	54.1	24.104	0	148.07	1737000000	145	1	0.402067	0.551789	0.565414	0.223996	2.19093	0.41619	0.573205	1.50856	0.30387	0.372807	1.08445	0.212741	0.377586		0.819496	0.876809	0.696054	0.647041	0.911129	0.819211	0.942094	0.93051	1.03397	1.59978	1.08906	1.02426	0.703817	0.680952	1.19872	1.01693	0.95614
Prephenate dehydratase (PDT) (EC 4.2.1.51)	pheA	P72808	P72808_SYNY3	L-phenylalanine biosynthetic process [GO:0009094]	cytoplasm [GO:0005737]	chorismate mutase activity [GO:0004106];prephenate dehydratase activity [GO:0004664]	chorismate mutase activity [GO:0004106];cytoplasm [GO:0005737];L-phenylalanine biosynthetic process [GO:0009094];prephenate dehydratase activity [GO:0004664]	297	3	3	3	16.5	32.342	0	5.4756	203060000	47	1	-0.162053	0.390132	0.587081	-0.405344	0.363764	0.662331	-0.357895	0.470691	0.546195	-0.480213	0.398797	0.509136	-0.377594		0.178576	0.0735431	0.104261	0.249762	0.0664	0.0582906	0.123779	0.105163	0.159806	0.106799	0.114807	0.15869	0.0673477	0.0522917	0.0868574	0.0857998	0.0684595
FO synthase subunit 2 (EC 2.5.1.77) (7,8-didemethyl-8-hydroxy-5-deazariboflavin synthase subunit 2)	cofH sll1659	P72811	COFH_SYNY3	coenzyme biosynthetic process [GO:0009108]		4 iron, 4 sulfur cluster binding [GO:0051539];7,8-didemethyl-8-hydroxy-5-deazariboflavin synthase activity [GO:0044689];metal ion binding [GO:0046872]	4 iron, 4 sulfur cluster binding [GO:0051539];7,8-didemethyl-8-hydroxy-5-deazariboflavin synthase activity [GO:0044689];coenzyme biosynthetic process [GO:0009108];metal ion binding [GO:0046872]	392	3	3	3	13.8	43.331	0	22.467	71807000	25	1	0.386907	1.06608	0.280598	0.658516	0.895764	0.419442	0.612945	0.313148	0.699831	0.232787	0.186055	0.740824	0.229146		0.0290929	0.0285203	0.0291426	0.0122441	0.0220302	0.0343156	0.0244884	0.0321529	0.0244858	0.037686	0.0202306	0.0399622	0.0333972	0.0492145	0.0480971	0.0280845	0.0194039
Slr1799 protein	slr1799	P72813	P72813_SYNY3		integral component of membrane [GO:0016021]		integral component of membrane [GO:0016021]	637	6	6	6	10.7	71.318	0	44.906	371990000	40	1	-0.427473	0.84668	0.3611	-0.486224	1.30244	0.410365	-0.646275	0.518933	0.575672	-0.275833	0.639565	0.408679	-0.287614		0.0682376	0.0765228	0.144073	0.0936179	0.0765702	0.0394374	0.0754227	0.0649644	0.0883266	0.0718171	0.0408501	0.0629512	0.108448	0.0542146	0.0661366	0.0503703	0.0360963
Slr1800 protein	slr1800	P72814	P72814_SYNY3					355	9	9	9	36.6	39.406	0	106.4	509840000	60	1	0.794687	0.931549	0.274654	1.23792	1.09957	0.400222	1.36261	1.43796	0.252108	1.79487	1.3833	0.0623513	1.71609		0.102097	0.0185496	0.115942	0.0346651	0.233069	0.164734	0.0271885	0.16132	0.140515	0.27448	0.13085	0.199918	0.0942719	0.269625	0.194736	0.19528	0.199657
Sll1656 protein	sll1656	P72815	P72815_SYNY3		integral component of membrane [GO:0016021]		integral component of membrane [GO:0016021]	191	2	2	2	16.2	20.493	0	66.416	138350000	29	1	-1.19547	1.47034	0.2212	-0.791224	0.212041	0.773685	-0.272995	1.15314	0.298097	-0.624553	1.18521	0.124366	-0.693974		0.324347	0.613968	0.504726	0.259486	0.215869	0.2576	0.223236	0.232869	0.298043		0.243346	0.221193	0.229644	0.193811	0.151416	0.302523	0.167879
Universal stress protein Sll1654 (USP Sll1654)	sll1654	P72817	Y1654_SYNY3	response to stress [GO:0006950]			response to stress [GO:0006950]	157	6	6	6	50.3	16.769	0	221.97	6227700000	223	1	-0.184993	1.37579	0.258109	-0.500384	0.905643	0.451665	-0.344075	1.54295	0.267967	-0.455393	2.90253	0.0250526	-0.768914	+	7.00269	6.62231	6.77195	5.10188	4.73947	6.36212	5.63237	4.97775	6.629	3.38246	4.1701	5.82953	4.47371	4.42178	2.78773	4.86526	3.77191
2-phytyl-1,4-naphtoquinone methyltransferase (EC 2.1.1.329) (Demethylphylloquinone methyltransferase)	menG sll1653	P72818	MENG_SYNY3	phylloquinone biosynthetic process [GO:0042372]		2-phytyl-1,4-naphthoquinone methyltransferase activity [GO:0052624]	2-phytyl-1,4-naphthoquinone methyltransferase activity [GO:0052624];phylloquinone biosynthetic process [GO:0042372]	238	4	4	4	29.4	26.072	0	74.505	395050000	52	1	0.190507	0.37512	0.619743	0.315616	0.0132111	0.983043	-0.0199147	0.25331	0.735596	0.250187	0.69035	0.295195	0.541086		0.322307	0.272463	0.202764	0.143421	0.109411	0.260004	0.280028	0.241533	0.0963209	0.319231	0.26794	0.183873	0.149371	0.350145	0.323759	0.372243	0.274598
Slr5119 protein	slr5119	Q6ZEL1;Q6ZEQ3;P73620;P72822;Q6ZEP8;Q6ZEL2;Q6ZEK6	Q6ZEL1_SYNY3					256	5	1	1	25.8	29.502	0	19.351	219130000	29	8	0.231367	0.592193	0.509778	-0.292664	0.130935	0.881545	-0.0774946	0.324213	0.706994	-0.201693	0.489638	0.506185	-0.238174		0.205814	0.105224	0.125275	0.121407	0.0862535	0.171361	0.161035	0.119924	0.187543	0.102066	0.102272	0.129765	0.100912	0.0992992	0.077476	0.123187	0.116726
Iron uptake protein A1	futA1 slr1295	P72827	FUTA1_SYNY3	ion transport [GO:0006811];iron ion homeostasis [GO:0055072]	plasma membrane [GO:0005886];thylakoid membrane [GO:0042651]	metal ion binding [GO:0046872]	ion transport [GO:0006811];iron ion homeostasis [GO:0055072];metal ion binding [GO:0046872];plasma membrane [GO:0005886];thylakoid membrane [GO:0042651]	360	24	24	24	75.8	39.37	0	323.31	18608000000	538	1	0.188467	0.305534	0.716283	-0.174404	0.176865	0.841015	-0.110975	0.372066	0.671221	-0.210093	0.994928	0.178071	-0.577814		13.355	7.78574	6.93969	5.70778	8.30585	8.59506	9.42206	26.8062	7.3096	4.1427	9.65237	7.55106	6.82331	6.9337	5.42038	10.3046	6.76174
tRNA (guanine-N(1)-)-methyltransferase (EC 2.1.1.228) (M1G-methyltransferase) (tRNA [GM37] methyltransferase)	trmD sll1198	P72828	TRMD_SYNY3		cytoplasm [GO:0005737]	2-C-methyl-D-erythritol 4-phosphate cytidylyltransferase activity [GO:0050518];tRNA (guanine(37)-N(1))-methyltransferase activity [GO:0052906];tRNA (guanine-N1-)-methyltransferase activity [GO:0009019]	2-C-methyl-D-erythritol 4-phosphate cytidylyltransferase activity [GO:0050518];cytoplasm [GO:0005737];tRNA (guanine(37)-N(1))-methyltransferase activity [GO:0052906];tRNA (guanine-N1-)-methyltransferase activity [GO:0009019]	231	4	4	4	25.1	25.948	0	23.945	367290000	45	1	0.262507	0.208434	0.750899	0.315436	0.0893334	0.900337	0.119645	0.438574	0.571863	0.461047	0.0204968	0.967885	-0.0326544		0.384861	0.208141	0.0625638	0.184978	0.156131	0.473458	0.486005	0.0266613	0.364753	0.160659	0.372363	0.471287	0.0899067	0.188499	0.145218	0.197458	0.2268
ATP-dependent 6-phosphofructokinase 1 (ATP-PFK 1) (Phosphofructokinase 1) (EC 2.7.1.11) (Phosphohexokinase 1)	pfkA1 pfkA sll1196	P72830	PFKA1_SYNY3	fructose 6-phosphate metabolic process [GO:0006002]	cytoplasm [GO:0005737]	6-phosphofructokinase activity [GO:0003872];ATP binding [GO:0005524];diphosphate-fructose-6-phosphate 1-phosphotransferase activity [GO:0047334];metal ion binding [GO:0046872]	6-phosphofructokinase activity [GO:0003872];ATP binding [GO:0005524];cytoplasm [GO:0005737];diphosphate-fructose-6-phosphate 1-phosphotransferase activity [GO:0047334];fructose 6-phosphate metabolic process [GO:0006002];metal ion binding [GO:0046872]	361	12	12	12	38.8	38.588	0	137.52	1128100000	117	1	0.251907	0.239592	0.7417	0.239476	0.247127	0.774002	0.165605	0.496832	0.581105	0.283047	0.92683	0.269723	-0.338894		0.423787	0.28425	0.270214	0.338547	0.395878	0.611535	0.562156	0.381457	0.353993	0.224996	0.624288	0.61693	0.590853	0.260116	0.169011	0.273899	0.685009
UDP-glucose 6-dehydrogenase (EC 1.1.1.22)	slr1299	P72834	P72834_SYNY3	polysaccharide biosynthetic process [GO:0000271]		NAD binding [GO:0051287];UDP-glucose 6-dehydrogenase activity [GO:0003979]	NAD binding [GO:0051287];polysaccharide biosynthetic process [GO:0000271];UDP-glucose 6-dehydrogenase activity [GO:0003979]	453	25	25	25	76.6	49.097	0	323.31	5618000000	381	1	0.280967	0.990652	0.315412	0.507256	1.26586	0.393122	0.531505	1.17002	0.306705	0.551207	1.76209	0.0625571	0.731346		1.13462	1.20408	0.815678	0.936486	2.012	1.48494	1.59366	1.63943	0.925941	1.54764	1.29943	1.426	1.42916	2.33517	1.96959	1.88965	1.86761
Slr1301 protein	slr1301	P72839	P72839_SYNY3					535	24	24	24	54.8	61.692	0	323.31	3527900000	320	1	-0.160793	0.729171	0.41597	-0.395964	0.906718	0.415208	-0.569495	0.922055	0.364373	-0.503493	0.64408	0.372057	-0.362574		1.57998	1.29921	0.887225	0.847525	0.584116	1.11096	0.852897	0.733004	1.13398	0.655683	0.951373	0.681827	0.661527	0.829795	0.641932	0.937192	0.461529
Slr1302 protein	slr1302	P72840	P72840_SYNY3					409	10	10	10	31.8	46.637	0	81.296	824860000	87	1	-0.449833	0.0898537	0.91736	-0.0669639	0.225074	0.793501	0.159605	0.393365	0.600077	-0.462453	0.526206	0.442117	-0.342694		0.342318	0.424205	0.177732	0.517033	0.314107	0.376966	0.363101	0.277218	0.0908098	0.255868	0.306314	0.380555	0.312509	0.342773	0.266147	0.284562	0.360681
Glycolate oxidase subunit GlcE	glcE	P72842	P72842_SYNY3			flavin adenine dinucleotide binding [GO:0050660];oxidoreductase activity, acting on CH-OH group of donors [GO:0016614]	flavin adenine dinucleotide binding [GO:0050660];oxidoreductase activity, acting on CH-OH group of donors [GO:0016614]	434	4	4	4	12.7	47.376	0	24.752	592870000	46	1	-0.111433	0.13733	0.915946	-0.0387839	0.0146701	0.987112	0.00550547	0.709235	0.525075	0.231867	0.178331	0.813574	-0.0681742		0.202362	0.223452	0.206967	0.265416	0.2899	0.235191	0.186267	0.235091	0.241818	0.19651	0.235253	0.219483	0.21431	0.246187	0.231085	0.272592	0.197004
Regulatory components of sensory transduction system	slr1305	P72843	P72843_SYNY3		intracellular [GO:0005622]	phosphorelay sensor kinase activity [GO:0000155]	intracellular [GO:0005622];phosphorelay sensor kinase activity [GO:0000155]	840	6	6	6	10.4	96.226	0	35.405	115830000	39	1	0.365985	0.0482494	0.939218	-0.133144	0.78735	0.419938	0.700325	0.266163	0.717508	0.314027	1.42636	0.0689231	1.14577		0.0147771	0.0153134	0.00597797	0.00646887	0.0289604		0.0324001	0.00812224	0.0153725	0.0246695	0.0012216	0.00983526	0.0125486	0.0238946	0.0443443	0.020393	0.0141436
Slr1306 protein	slr1306	P72844	P72844_SYNY3					485	3	3	3	8.5	54.27	0	9.9806	154500000	33	1	0.0944469	0.755609	0.359352	0.687476	0.680366	0.45226	0.651705	0.676852	0.418685	0.644067	0.372222	0.523712	0.403666		0.0250735	0.0828436	0.0164573	0.0596402	0.0728578	0.0889851	0.0120547	0.055364	0.0527601	0.0657653	0.0777552	0.0732046	0.0631651	0.0679269	0.0658895	0.0880958	0.072393
Sll1188 protein	sll1188	P72845	P72845_SYNY3					164	5	5	5	30.5	18.816	0	65.942	1729600000	71	1	-0.247433	0.722717	0.442677	-0.320184	1.23648	0.419756	-0.296255	1.53994	0.298914	-0.379173	2.30811	0.038807	-0.724734	+	2.12979	1.87467	1.92675	1.77797	1.33823	1.93765	1.32965	1.6667	1.74399	1.03682	1.87447	1.74967	1.59115	1.2939	0.893657	1.65958	1.37382
Sll1186 protein	sll1186	P72847	P72847_SYNY3					216	5	5	5	16.2	25.117	0	17.296	179290000	24	1	0.627487	1.10508	0.252556	0.946496	0.817694	0.419071	0.608985	0.0716331	0.917143	-0.0798131	0.281638	0.628158	-0.305194		0.0795392	0.118137	0.0398127	0.0475118	0.137416	0.142824	0.292527	0.0662881	0.0781447	0.0993092	0.181644	0.293815	0.0885215	0.136922	0.100376	0.159212	0.139119
Oxygen-dependent coproporphyrinogen-III oxidase (CPO) (Coprogen oxidase) (Coproporphyrinogenase) (EC 1.3.3.3)	hemF sll1185	P72848	HEM6_SYNY3	chlorophyll biosynthetic process [GO:0015995];protoporphyrinogen IX biosynthetic process [GO:0006782]	cytoplasm [GO:0005737]	coproporphyrinogen oxidase activity [GO:0004109];metal ion binding [GO:0046872];protein homodimerization activity [GO:0042803]	chlorophyll biosynthetic process [GO:0015995];coproporphyrinogen oxidase activity [GO:0004109];cytoplasm [GO:0005737];metal ion binding [GO:0046872];protein homodimerization activity [GO:0042803];protoporphyrinogen IX biosynthetic process [GO:0006782]	340	23	23	23	74.7	38.937	0	323.31	17718000000	527	1	0.288007	0.558059	0.552299	0.239936	0.92914	0.450387	0.327305	0.65808	0.545273	0.231187	0.488317	0.524989	-0.205114		5.15263	7.24575	5.41579	5.50075	9.44288	7.4359	8.21661	9.44004	7.79793	6.33599	8.51781	8.52724	7.61198	8.03126	5.43279	8.78424	7.8462
Heme oxygenase 1 (EC 1.14.14.18)	pbsA1 sll1184	P72849	HO1_SYNY3	heme catabolic process [GO:0042167];heme oxidation [GO:0006788];iron ion homeostasis [GO:0055072];photosynthesis [GO:0015979];response to oxidative stress [GO:0006979]	membrane [GO:0016020]	heme binding [GO:0020037];heme oxygenase (decyclizing) activity [GO:0004392];metal ion binding [GO:0046872]	heme binding [GO:0020037];heme catabolic process [GO:0042167];heme oxidation [GO:0006788];heme oxygenase (decyclizing) activity [GO:0004392];iron ion homeostasis [GO:0055072];membrane [GO:0016020];metal ion binding [GO:0046872];photosynthesis [GO:0015979];response to oxidative stress [GO:0006979]	240	17	17	17	71.2	27.05	0	290.72	8830300000	227	1	0.215987	0.41331	0.626659	0.223496	1.15756	0.41599	0.357585	0.350196	0.713919	0.160327	0.38537	0.585421	-0.204814		4.00919	3.58093	3.67685	4.08526	6.03865	5.19674	5.03832	5.13439	5.03081	4.0704	6.67831	5.42446	5.88961	4.42331	2.99383	6.05244	5.86038
50S ribosomal protein L28	rpmB rpl28 ssr1604	P72851	RL28_SYNY3	translation [GO:0006412]	cytosolic large ribosomal subunit [GO:0022625]	structural constituent of ribosome [GO:0003735]	cytosolic large ribosomal subunit [GO:0022625];structural constituent of ribosome [GO:0003735];translation [GO:0006412]	78	7	7	7	67.9	8.9934	0	26.079	12576000000	62	1	0.310847	0.194854	0.770655	0.250716	0.453054	0.577639	0.506085	0.323232	0.651665	0.423527	0.502522	0.410418	0.530666		19.4367	5.55403	17.7626	6.36221	8.94032	20.6048	13.2861	7.40086	7.44356	21.2394	20.2701	5.60875	8.41155	18.2008	14.9409	21.7919	16.2548
Slr0962 protein	slr0962	P72852	P72852_SYNY3		integral component of membrane [GO:0016021]		integral component of membrane [GO:0016021]	477	4	4	4	11.5	51.836	0	82.581	1060500000	65	1	-0.033993	0.22368	0.804154	-0.0971839	0.376247	0.666105	-0.289895	1.02056	0.383468	-0.341173	1.94906	0.0655225	-0.580414		0.669989	0.593959	0.67039	0.514138	0.568971	0.883748	0.732014	0.505889	0.607347	0.348993	0.670581	0.684527	0.482089	0.647354	0.388987	0.502891	0.232402
Sulfite reductase [ferredoxin] (EC 1.8.7.1)	sir slr0963	P72854	SIR_SYNY3	regulation of transcription, DNA-templated [GO:0006355];sulfate reduction [GO:0019419]		4 iron, 4 sulfur cluster binding [GO:0051539];heme binding [GO:0020037];metal ion binding [GO:0046872];sulfite reductase (ferredoxin) activity [GO:0050311];sulfite reductase activity [GO:0016002]	4 iron, 4 sulfur cluster binding [GO:0051539];heme binding [GO:0020037];metal ion binding [GO:0046872];regulation of transcription, DNA-templated [GO:0006355];sulfate reduction [GO:0019419];sulfite reductase (ferredoxin) activity [GO:0050311];sulfite reductase activity [GO:0016002]	635	44	44	44	77.2	71.44	0	323.31	24029000000	811	1	0.0264269	0.035886	0.977673	0.00723605	0.152579	0.904601	0.0379053	0.0465181	0.972237	0.0106269	0.264321	0.812436	0.0486457		4.47104	4.36486	4.28404	3.936	4.83403	4.6393	4.10204	4.11044	5.19381	4.29087	4.14934	4.60142	4.22652	4.93868	4.09281	5.19498	3.81635
Beta sliding clamp (Beta clamp) (Sliding clamp) (Beta-clamp processivity factor) (DNA polymerase III beta sliding clamp subunit) (DNA polymerase III subunit beta)	dnaN slr0965	P72856	DPO3B_SYNY3	DNA replication [GO:0006260]	cytoplasm [GO:0005737];DNA polymerase III complex [GO:0009360]	3'-5' exonuclease activity [GO:0008408];DNA binding [GO:0003677];DNA-directed DNA polymerase activity [GO:0003887]	3'-5' exonuclease activity [GO:0008408];cytoplasm [GO:0005737];DNA binding [GO:0003677];DNA polymerase III complex [GO:0009360];DNA replication [GO:0006260];DNA-directed DNA polymerase activity [GO:0003887]	391	13	13	12	55.8	42.087	0	323.31	4628600000	240	1	0.088187	0.0890715	0.91977	0.0568562	0.284096	0.771128	0.131565	0.359422	0.696076	0.179247	0.626969	0.402382	0.310086		1.86931	1.90202	1.12208	1.74379	2.11539	1.78387	1.69966	1.61227	1.69254	2.41458	1.61931	1.36744	1.57753	2.75629	1.86141	2.28916	1.5195
Aspartate transaminase	sll0938	P72859	P72859_SYNY3	biosynthetic process [GO:0009058]		catalytic activity [GO:0003824];pyridoxal phosphate binding [GO:0030170]	biosynthetic process [GO:0009058];catalytic activity [GO:0003824];pyridoxal phosphate binding [GO:0030170]	391	5	5	5	16.4	42.071	0	19.264	287740000	62	1	-0.0389729	0.0916647	0.909995	0.0862561	0.487885	0.636223	0.221425	0.174931	0.813506	-0.152013	0.585644	0.415867	0.326746		0.20298	0.127576	0.108433	0.118547	0.158739	0.120183	0.121484	0.10931	0.150809	0.1918	0.174401	0.201993	0.065013	0.153971	0.202051	0.188589	0.167461
Uncharacterized protein sll0936	sll0936	P72861	Y936_SYNY3	ubiquinone biosynthetic process [GO:0006744]	cytosol [GO:0005829]	3-octaprenyl-4-hydroxybenzoate carboxy-lyase activity [GO:0008694];cofactor binding [GO:0048037]	3-octaprenyl-4-hydroxybenzoate carboxy-lyase activity [GO:0008694];cofactor binding [GO:0048037];cytosol [GO:0005829];ubiquinone biosynthetic process [GO:0006744]	501	14	14	14	33.9	55.201	0	70.42	2991100000	176	1	-0.152033	1.14207	0.337503	-0.332544	0.741945	0.552923	-0.220835	0.61429	0.601521	-0.177773	0.767972	0.421761	-0.209714		1.16474	0.979376	0.897741	0.936615	0.709624	1.02442	0.782001	0.710395	0.925492	0.763009	0.838849	0.92786	0.681777	0.652354	0.621012	0.811362	0.721261
Precorrin methylase	cbiH	P72862	P72862_SYNY3	cobalamin biosynthetic process [GO:0009236]		methyltransferase activity [GO:0008168]	cobalamin biosynthetic process [GO:0009236];methyltransferase activity [GO:0008168]	627	8	8	8	11.8	67.61	0	12.648	511050000	68	1	-0.015513	0.819542	0.502428	0.195296	0.420486	0.707856	0.139005	0.0109445	0.989448	-0.00845308	0.398818	0.513083	-0.354394		0.127089	0.146455	0.10949	0.128713	0.107643	0.167288	0.147649	0.144235	0.0790491	0.0950132	0.170576	0.155607	0.132942	0.13139	0.119833	0.162726	0.170979
Slr0971 protein	slr0971	P72863	P72863_SYNY3		integral component of membrane [GO:0016021]		integral component of membrane [GO:0016021]	451	4	4	4	13.3	49.667	0	10.467	192300000	25	1	0.299691	0.0607049	0.926764	0.11476	0.119069	0.861117	-0.267071	0.133636	0.825908	-0.34481	0.347365	0.528609	0.504749		0.109212	0.0851963	0.0742365		0.123598	0.183634	0.075042	0.0455942	0.058985	0.0820855	0.158525	0.0473884	0.0515556	0.0595121	0.0695306	0.109448	0.0112276
Carboxysome formation protein	ccmA	P72864	P72864_SYNY3	aromatic amino acid family biosynthetic process [GO:0009073]		aldehyde-lyase activity [GO:0016832];transferase activity [GO:0016740]	aldehyde-lyase activity [GO:0016832];aromatic amino acid family biosynthetic process [GO:0009073];transferase activity [GO:0016740]	351	20	20	20	68.4	37.633	0	323.31	15971000000	292	1	0.548767	1.6272	0.199404	0.968736	1.17452	0.409624	0.822545	2.04863	0.284182	1.20757	2.37514	0.0252381	1.28699	+	3.65535	2.58369	3.2431	3.88504	8.50274	5.46229	4.51192	3.8933	6.17394	11.4404	6.95323	5.44555	6.88269	10.0278	11.117	8.38969	8.2907
Sll0933 protein	sll0933	P72865	P72865_SYNY3		integral component of membrane [GO:0016021]		integral component of membrane [GO:0016021]	158	5	5	5	24.1	17.647	0	67.507	888860000	66	1	0.936327	2.36249	0.194	1.17088	0.893412	0.40244	0.878365	2.00093	0.294769	1.09889	3.24192	0.0298182	1.68877	+	0.431463	0.388944	0.875132	0.397611	0.842312	1.5231	0.867144	0.312904	1.59825	1.91106	1.26802	0.882874	1.24269	1.31615	1.55411	1.77574	0.973595
30S ribosomal protein S15	rpsO rps15 ssl1784	P72866	RS15_SYNY3	translation [GO:0006412]	cytosolic small ribosomal subunit [GO:0022627]	rRNA binding [GO:0019843];structural constituent of ribosome [GO:0003735]	cytosolic small ribosomal subunit [GO:0022627];rRNA binding [GO:0019843];structural constituent of ribosome [GO:0003735];translation [GO:0006412]	89	8	8	8	70.8	10.373	0	124	17317000000	142	1	-0.159033	0.860919	0.448196	0.239336	0.0704529	0.920355	-0.0660744	0.840333	0.416612	0.371727	0.142761	0.793228	0.163506		24.568	23.4601	26.534	22.664	37.7323	31.5203	25.5339	23.9274	9.86071	39.6891	31.3759	28.3225	32.8125	35.357	29.0767	37.766	30.3241
Sll0931 protein	sll0931	P72868	P72868_SYNY3		integral component of membrane [GO:0016021]		integral component of membrane [GO:0016021]	156	3	3	3	37.8	16.589	0	8.2391	248040000	59	1	-0.331653	0.117715	0.893357	-0.0778838	0.35633	0.679244	-0.249395	0.193228	0.812559	0.120847	0.354722	0.603909	0.206486		0.314757	0.261654	0.340629	0.141623	0.28053	0.339341	0.193237	0.0951003	0.179816	0.314901	0.293693	0.196334	0.267104	0.260026	0.212464	0.332752	0.240731
Allophycocyanin subunit alpha-B	apcD sll0928	P72870	APCD_SYNY3	oxidation-reduction process [GO:0055114];photosynthesis [GO:0015979];protein-chromophore linkage [GO:0018298]	phycobilisome [GO:0030089]		oxidation-reduction process [GO:0055114];photosynthesis [GO:0015979];phycobilisome [GO:0030089];protein-chromophore linkage [GO:0018298]	161	17	17	17	70.2	17.923	0	323.31	23576000000	335	1	-0.172933	0.636574	0.494723	-0.283644	0.068805	0.937658	-0.0337347	1.2468	0.347652	-0.342473	2.57136	0.0312581	-0.763954	+	17.4882	21.2934	16.4598	13.8099	16.9325	14.0481	21.7922	18.1713	12.2295	11.5696	16.1323	19.7336	11.6356	15.7658	9.18317	17.3819	16.3656
S-adenosylmethionine synthase (AdoMet synthase) (EC 2.5.1.6) (MAT) (Methionine adenosyltransferase)	metK sll0927	P72871	METK_SYNY3	one-carbon metabolic process [GO:0006730];S-adenosylmethionine biosynthetic process [GO:0006556]	cytosol [GO:0005829]	ATP binding [GO:0005524];metal ion binding [GO:0046872];methionine adenosyltransferase activity [GO:0004478]	ATP binding [GO:0005524];cytosol [GO:0005829];metal ion binding [GO:0046872];methionine adenosyltransferase activity [GO:0004478];one-carbon metabolic process [GO:0006730];S-adenosylmethionine biosynthetic process [GO:0006556]	426	22	22	22	70.7	45.865	0	323.31	27268000000	464	1	0.194287	0.787324	0.427829	0.300276	0.453047	0.632048	0.270805	1.01517	0.345065	0.490087	2.22267	0.0408677	0.724166	+	10.4571	5.85202	7.36187	6.42648	9.02187	10.7362	6.21883	7.05572	8.00106	13.5881	11.7809	7.34661	8.38942	10.5621	9.6424	12.7614	12.183
Uncharacterized protein sll0925	sll0925	P72873	Y925_SYNY3					202	3	3	3	19.8	22.996	0	47.836	99998000	45	1	0.509094	0.624106	0.381822	1.0362	0.754899	0.423664	1.05011	0.587009	0.441352	0.808541	0.941555	0.141953	1.22839		0.0519371	0.0942107	0.0115327	0.0214041	0.038637	0.0649155	0.0924516	0.0335997		0.131221	0.0898637	0.107946		0.119902	0.115111	0.135167	0.106483
Translation initiation factor IF-3	infC slr0974	P72874	IF3_SYNY3	ribosome disassembly [GO:0032790]	cytosol [GO:0005829];membrane [GO:0016020]	ribosome binding [GO:0043022];translation initiation factor activity [GO:0003743]	cytosol [GO:0005829];membrane [GO:0016020];ribosome binding [GO:0043022];ribosome disassembly [GO:0032790];translation initiation factor activity [GO:0003743]	177	11	11	11	61	20.559	0	323.31	7790400000	220	1	0.083387	0.435464	0.625963	0.202556	0.148308	0.863605	0.0934854	0.614448	0.552274	0.244047	0.849769	0.28516	0.358886		7.12757	3.71081	6.83609	5.99155	7.36981	5.47822	4.34496	6.44238	7.83749	8.869	6.65613	5.30583	7.54893	7.40565	8.15957	6.71886	5.80741
Exopolysaccharide export protein	epsB	P72877	P72877_SYNY3	lipopolysaccharide biosynthetic process [GO:0009103]	membrane [GO:0016020]		lipopolysaccharide biosynthetic process [GO:0009103];membrane [GO:0016020]	756	18	18	18	31.2	83.64	0	323.31	2820600000	338	1	-0.0663931	0.50055	0.573076	-0.246744	0.331088	0.700494	-0.231855	0.266886	0.736227	-0.208793	0.893626	0.227628	-0.496534		1.30895	0.884868	0.898551	0.730638	0.538205	0.916691	1.24707	0.833869	0.647653	0.526633	0.619889	0.694708	0.910084	0.682133	0.650938	0.841373	0.962791
Alpha-D-glucose-1-phosphate cytidylyltransferase	rfbF	P72885	P72885_SYNY3	biosynthetic process [GO:0009058]		glucose-1-phosphate cytidylyltransferase activity [GO:0047343]	biosynthetic process [GO:0009058];glucose-1-phosphate cytidylyltransferase activity [GO:0047343]	256	5	5	5	27.7	28.793	0	81.976	269020000	53	1	0.582667	0.000455313	0.999351	-0.000603914	0.106254	0.888961	0.119365	0.335415	0.662568	0.303267	0.108685	0.838188	0.138846		0.244908	0.122949	0.115237	0.0685656	0.0798772	0.148683	0.253849	0.157202	0.13858	0.174122	0.123869	0.0486195	0.134621	0.151367	0.154534	0.160475	0.0986863
CDP-glucose-4,6-dehydratase	rfbG	P72886	P72886_SYNY3					360	8	8	8	31.1	40.074	0	21.034	392220000	25	1	-0.350533	0.30451	0.649332	-0.423764	0.329334	0.664989	-0.531875	0.591457	0.443415	-0.744153	0.045695	0.928199	0.0817058		0.282439	0.110632	0.237282	0.240954	0.0412411	0.0541238	0.14014	0.0905585	0.158856	0.200375	0.0891317	0.0678399	0.168343	0.0883348	0.188651	0.0589043	0.0515992
dTDP-6-deoxy-L-mannose-dehydrogenase	rfbC	P72887	P72887_SYNY3			dTDP-4-dehydrorhamnose 3,5-epimerase activity [GO:0008830]	dTDP-4-dehydrorhamnose 3,5-epimerase activity [GO:0008830]	189	3	3	3	19.6	20.942	0	8.6238	121440000	4	1	-0.634548	0.289274	0.637261	-0.849158	0.826085	0.395789	-1.57779	0.00520532	0.992156	0.014668	0.00562214	0.989566	0.0188111		0.164449		0.109908	0.153832	0.174806	0.0472614	0.0114973	0.18004	0.103664	0.085364		0.00383217	0.178052	0.142154	0.147102
Slr1610 protein	slr1610	P72888	P72888_SYNY3					433	8	8	8	23.1	48.013	0	48.493	1063200000	121	1	-0.0257931	0.153767	0.863148	-0.0862039	0.325596	0.704606	-0.227055	0.597732	0.517907	-0.322233	0.0248748	0.967578	-0.0184143		0.658981	0.476363	0.375887	0.475504	0.272519	0.413686	0.503458	0.407421	0.463677	0.355389	0.422312	0.366854	0.388496	0.420194	0.448442	0.372372	0.392481
Slr1612 protein	slr1612	P72890	P72890_SYNY3					286	10	10	10	47.2	33.045	0	147.99	646550000	111	1	0.160647	0.467471	0.572668	0.285556	0.31614	0.704062	0.245185	0.937841	0.371795	0.443707	1.48482	0.0821538	0.723266		0.348326	0.254429	0.256241	0.204295	0.182166	0.286619	0.263567	0.235222	0.242859	0.34174	0.233514	0.24796	0.224825	0.32881	0.531187	0.370108	0.130814
Perosamine synthetase	rfbE	P72893	P72893_SYNY3			catalytic activity [GO:0003824]	catalytic activity [GO:0003824]	378	2	2	2	7.7	41.944	0	27.485	205010000	24	1	-0.105733	1.82617	0.19501	-0.681824	0.851591	0.434822	-0.483255	0.937909	0.388323	-0.379313	0.51798	0.458223	-0.301574		0.0877784	0.0793478	0.142208	0.118604	0.0812452	0.0600916	0.0843916	0.140417	0.121817	0.0762706	0.0528	0.0576586	0.087049	0.0498738	0.0679771	0.0553266	0.0562967
Slr1616 protein	slr1616	P72894	P72894_SYNY3	C-terminal protein amino acid modification [GO:0018410];SOS response [GO:0009432]	cytoplasm [GO:0005737]	ATP binding [GO:0005524];metal ion binding [GO:0046872];ribosomal S6-glutamic acid ligase activity [GO:0018169]	ATP binding [GO:0005524];C-terminal protein amino acid modification [GO:0018410];cytoplasm [GO:0005737];metal ion binding [GO:0046872];ribosomal S6-glutamic acid ligase activity [GO:0018169];SOS response [GO:0009432]	341	7	7	7	28.7	37.353	0	104.04	685870000	77	1	-0.400193	1.59226	0.202526	-1.24236	1.17721	0.41514	-1.20413	1.23052	0.262428	-1.08469	0.440827	0.464812	-0.436654		1.01869	0.351339	0.568634	0.453894	0.160743	0.185207	0.371271	0.374774	0.429221	0.335381	0.156484	0.153784	0.246195	0.191568	0.176506	0.227907	0.325492
Slr1617 protein	slr1617	P72895	P72895_SYNY3			catalytic activity [GO:0003824];coenzyme binding [GO:0050662]	catalytic activity [GO:0003824];coenzyme binding [GO:0050662]	411	18	18	18	54.5	45.405	0	239	2969900000	285	1	0.00620699	0.390231	0.631503	-0.238484	0.141086	0.857683	-0.135175	0.159723	0.839337	-0.111453	0.797935	0.278613	-0.420234		1.41844	1.26728	0.983074	0.930662	0.497589	1.08991	1.04452	0.963124	1.14297	0.667191	0.911417	0.900862	0.71602	0.831868	0.732191	0.998557	0.716478
Slr1618 protein	slr1618	P72896	P72896_SYNY3	methylation [GO:0032259]	cytoplasm [GO:0005737]	S-adenosylmethionine-dependent methyltransferase activity [GO:0008757]	cytoplasm [GO:0005737];methylation [GO:0032259];S-adenosylmethionine-dependent methyltransferase activity [GO:0008757]	261	9	9	9	44.4	29.001	0	79.174	1202100000	123	1	0.00216697	0.125657	0.891312	0.0760761	0.0349229	0.967218	0.0171654	0.691849	0.558148	0.202787	1.14923	0.212142	0.349486		0.533814	0.417988	0.549835	0.554181	0.680811	0.360959	0.587248	0.741333	0.519535	0.571241	0.5105	0.464091	0.408009	0.83806	0.743752	0.487413	0.429847
Slr1619 protein	slr1619	P72897	P72897_SYNY3	chondroitin sulfate biosynthetic process [GO:0030206];DIM/DIP cell wall layer assembly [GO:0071770];lipid biosynthetic process [GO:0008610]	plasma membrane [GO:0005886]	methyltransferase activity [GO:0008168]	chondroitin sulfate biosynthetic process [GO:0030206];DIM/DIP cell wall layer assembly [GO:0071770];lipid biosynthetic process [GO:0008610];methyltransferase activity [GO:0008168];plasma membrane [GO:0005886]	249	7	7	7	27.7	27.752	0	191.03	3976100000	190	1	-0.023013	0.151837	0.886223	0.0603361	0.329799	0.784348	0.0961254	0.0243422	0.979836	-0.0106931	0.769516	0.388899	-0.242634		3.66702	3.04266	2.79079	2.19258	2.87652	2.17002	3.41466	3.27795	2.65754	2.80922	3.05926	3.49569	2.43087	3.38704	2.74916	2.98042	3.13963
Slr1063 protein	slr1063	P72899	P72899_SYNY3			transferase activity, transferring glycosyl groups [GO:0016757]	transferase activity, transferring glycosyl groups [GO:0016757]	689	10	10	10	15.4	79.962	0	41.878	803330000	89	1	0.0125271	0.290942	0.706879	-0.222664	0.207162	0.80036	-0.156295	0.114375	0.883481	-0.090853	1.42433	0.0796243	-0.851234		0.284364	0.261836	0.253204	0.227877	0.0993406	0.264916	0.209184	0.243686	0.234765	0.140591	0.212669	0.214074	0.214667	0.170829	0.118158	0.156944	0.190253
Mannosyltransferase B	rfbU	P72900	P72900_SYNY3			transferase activity, transferring glycosyl groups [GO:0016757]	transferase activity, transferring glycosyl groups [GO:0016757]	367	11	11	11	33.5	41.848	0	60.737	1048200000	127	1	-0.010653	0.433318	0.627415	-0.205164	0.298977	0.748218	-0.151755	0.253614	0.772894	-0.142353	1.15865	0.199198	-0.371774		0.711487	0.607533	0.448156	0.403916	0.499109	0.605461	0.704437	0.59353	0.424899	0.349914	0.540656	0.587426	0.328889	0.482642	0.380454	0.450318	0.519715
Slr1065 protein	slr1065	P72901	P72901_SYNY3			transferase activity, transferring glycosyl groups [GO:0016757]	transferase activity, transferring glycosyl groups [GO:0016757]	356	4	4	4	21.3	41.592	0	68.217	243190000	78	1	0.214447	0.262998	0.693737	0.395896	0.520031	0.526816	0.700145	1.03345	0.273383	1.09689	0.272591	0.604655	0.525046		0.119701	0.0590727	0.0165442	0.0336029	0.0628487	0.0708891	0.112566	0.0651899	0.015185	0.0657653	0.0817455	0.0467749	0.0284007	0.0589823	0.152111	0.110715	0.0297636
Slr1066 protein	slr1066	P72902	P72902_SYNY3			transferase activity, transferring hexosyl groups [GO:0016758]	transferase activity, transferring hexosyl groups [GO:0016758]	401	13	13	13	41.4	45.95	0	81.028	1021300000	155	1	0.036687	0.194498	0.804162	-0.123224	0.359451	0.690398	-0.213575	0.533501	0.572032	0.267587	0.28814	0.650098	0.211286		0.405651	0.305371	0.258937	0.336069	0.172101	0.268968	0.331698	0.365462	0.189345	0.341243	0.223165	0.216791	0.248096	0.26886	0.37506	0.262505	0.257687
UDP-glucose-4-epimerase	galE	P72903	P72903_SYNY3	galactose metabolic process [GO:0006012]		coenzyme binding [GO:0050662];UDP-glucose 4-epimerase activity [GO:0003978]	coenzyme binding [GO:0050662];galactose metabolic process [GO:0006012];UDP-glucose 4-epimerase activity [GO:0003978]	340	6	6	6	31.8	37.495	0	80.679	467310000	64	1	-0.00215292	0.306522	0.650812	-0.399984	0.0377893	0.948806	0.0674254	0.069859	0.91454	0.106827	0.398326	0.483463	-0.519994		0.569359	0.312155	0.0821425	0.150478	0.167557	0.294432	0.362623	0.164675	0.262482	0.0791685	0.257775	0.242436	0.135924	0.108625	0.0997384	0.31675	0.280038
Slr1070 protein	slr1070	P72906	P72906_SYNY3					285	2	2	2	6.7	33.16	0.0010782	2.4845	1978300000	3	1	0.146687	0.673914	0.416548	0.478276	0.961083	0.417011	0.537325	0.402275	0.616257	0.334287	0.0128021	0.982627	-0.0110143		0.818531	0.964153	0.534615	0.58818	1.3938	1.10858	0.95293	1.0835	0.545667	0.920743	1.60947	0.987723	0.89383	1.76324	0.724317	1.38244	1.63138
Slr1073 protein	slr1073	P72909	P72909_SYNY3					384	4	4	4	16.7	43.527	0	22.295	147590000	19	1	-0.503313	0.584552	0.442279	-0.547824	0.547278	0.508998	-0.765455	0.381429	0.608226	-0.448673	0.794176	0.227479	-0.697074		0.117222	0.0756369	0.106733	0.0560411	0.0215828	0.022177	0.124813	0.0889164	0.0213991	0.0379797	0.0437547	0.0553136	0.0484947	0.0409562	0.0356635	0.0204043	0.0383772
Slr1076 protein	slr1076	P72911	P72911_SYNY3			transferase activity, transferring hexosyl groups [GO:0016758]	transferase activity, transferring hexosyl groups [GO:0016758]	381	8	8	8	25.5	43.374	0	59.94	883060000	147	1	-0.298433	1.01747	0.284433	-0.694304	0.68112	0.464292	-0.589555	0.385561	0.624188	-0.343073	0.596545	0.381804	-0.405414		0.709566	0.392492	0.562401	0.4634	0.206573	0.288053	0.430995	0.353356	0.321857	0.37748	0.2183	0.216041	0.443982	0.208154	0.310119	0.258049	0.291384
Slr1077 protein	slr1077	P72912	P72912_SYNY3			transferase activity, transferring glycosyl groups [GO:0016757]	transferase activity, transferring glycosyl groups [GO:0016757]	386	2	2	2	7.5	43.52	0	11.582	51046000	13	1	-1.33601	2.23779	0.197	-1.07162	0.638093	0.469286	-0.724668	1.08207	0.260755	-1.23446	1.85225	0.0410929	-1.16431	+	0.0329886	0.0303204	0.0481598	0.0430611	0.0602092	0.00972967	0.0383413	0.0221814			0.0271403		0.0148301	0.014995	0.0305135	0.0351147
Slr1087 protein	slr1087	P72923	P72923_SYNY3					361	3	3	3	12.2	39.395	0	6.331	70082000	30	1	-0.288831	0.783262	0.320498	-0.984641	0.849143	0.393245	-1.34331	0.377612	0.590792	-0.644491	0.388667	0.480196	-0.623374		0.0968174	0.0274935	0.061489	0.0554614		0.0291817	0.0267734	0.0602161	0.059908	0.0132954	0.0145957	0.051613	0.0154064	0.019561	0.0148026	0.0187901	0.0502509
Sll1025 protein	sll1025	P72924	P72924_SYNY3		cytoplasm [GO:0005737]	oxidoreductase activity [GO:0016491]	cytoplasm [GO:0005737];oxidoreductase activity [GO:0016491]	392	3	3	3	13.5	42.971	0	14.608	106660000	15	1	-0.179813	0.083481	0.916297	0.102056	0.0287449	0.96591	0.0303453	0.473471	0.581668	-0.316393	1.0409	0.160066	-0.623934		0.0413522	0.0869683	0.0342933	0.0674671	0.0304255	0.0604635	0.0636782	0.0487854	0.0274946	0.0262866	0.0508426	0.124972	0.035921	0.047092	0.0335485	0.0455097	0.043831
UPF0367 protein ssl1972	ssl1972	P72925	Y197A_SYNY3					93	5	5	5	52.7	9.9234	0	33.053	777530000	41	1	0.556607	0.601436	0.408049	0.874776	0.725531	0.418723	0.999125	0.360139	0.610086	0.572107	0.497442	0.376491	-0.917234		1.06512	1.36125	0.979741	0.127921	0.238627	1.23252	1.01793	0.756543	0.990681	0.317399	1.43126	0.787897	0.935865	1.24154	0.686149	1.08351	1.1365
Succinate--CoA ligase	sucC	P72927	P72927_SYNY3	tricarboxylic acid cycle [GO:0006099]		ATP binding [GO:0005524];ligase activity [GO:0016874];metal ion binding [GO:0046872]	ATP binding [GO:0005524];ligase activity [GO:0016874];metal ion binding [GO:0046872];tricarboxylic acid cycle [GO:0006099]	401	13	13	13	33.9	44.052	0	65.15	1387800000	68	1	0.039027	0.311733	0.727494	0.146036	0.752891	0.574194	0.189725	0.248359	0.754549	0.193427	2.82781	0.0296134	0.685566	+	0.521779	0.468894	0.495265	0.448484	0.404336	0.508672	0.366921	0.388771	0.461497	0.751201	0.390876	0.420617	0.458525	0.605218	0.798903	0.558379	0.420476
Uncharacterized protein sll1021	sll1021	P72929	Y1021_SYNY3		integral component of membrane [GO:0016021]		integral component of membrane [GO:0016021]	673	28	28	28	47.3	74.423	0	323.31	5121100000	440	1	-0.557273	1.56857	0.196167	-1.08674	1.06548	0.397711	-1.04149	1.54776	0.262047	-1.03361	2.36316	0.0290169	-0.986914	+	2.25763	1.57717	2.54501	2.3075	1.16169	1.66406	1.33315	1.41019	2.38137	0.472626	1.20763	1.28626	1.43622	0.46562	0.541035	1.08765	0.381722
Sll1020 protein	sll1020	P72930	P72930_SYNY3					294	4	4	4	16.3	33.697	0	13.223	61993000	5	1	0.391639	0.451008	0.504937	0.752686	1.6825	0.431529	1.16066	1.0146	0.300328	0.862673	0.382232	0.522843	0.372001			0.0264779	0.0225063		0.0205464	0.0334908	0.0324946	0.0231217		0.0324975	0.0402347	0.0581684	0.0185154	0.0734154	0.00504298		0.0342202
GTPase Obg (EC 3.6.5.-) (GTP-binding protein Obg)	obg slr1090	P72931	OBG_SYNY3		cytoplasm [GO:0005737]	GTP binding [GO:0005525];GTPase activity [GO:0003924];magnesium ion binding [GO:0000287]	cytoplasm [GO:0005737];GTP binding [GO:0005525];GTPase activity [GO:0003924];magnesium ion binding [GO:0000287]	368	7	7	7	25.3	39.206	0	86.383	723660000	127	1	0.257547	0.865077	0.363895	0.423756	0.400639	0.671918	0.215985	1.13317	0.341537	0.427327	1.54094	0.0948108	0.575666		0.275249	0.140003	0.146023	0.207564	0.260965	0.258638	0.218915	0.241115	0.170399	0.319895	0.182932	0.278853	0.346727	0.298857	0.25045	0.217354	0.299908
Hydroxyacylglutathione hydrolase (EC 3.1.2.6) (Glyoxalase II) (Glx II)	gloB sll1019	P72933	GLO2_SYNY3	methylglyoxal catabolic process to D-lactate via S-lactoyl-glutathione [GO:0019243]		hydroxyacylglutathione hydrolase activity [GO:0004416];metal ion binding [GO:0046872]	hydroxyacylglutathione hydrolase activity [GO:0004416];metal ion binding [GO:0046872];methylglyoxal catabolic process to D-lactate via S-lactoyl-glutathione [GO:0019243]	257	4	4	4	18.3	28.724	0	7.9714	263690000	22	1	0.227507	0.691955	0.407779	0.498796	0.426313	0.63161	0.308465	0.239544	0.749907	0.239087	0.0733356	0.896556	-0.0650743		0.116646	0.0729137	0.0899378	0.0831482	0.231411	0.131443	0.0854274	0.0793181	0.19374	0.187657	0.136	0.149486	0.102158	0.244724	0.16313	0.152747	0.101933
Probable dihydroorotase-like protein (Aspartate carbamoyltransferase 42 kDa non-catalytic chain)	pyrC' sll1018	P72934	PYRX_SYNY3	purine nucleobase catabolic process [GO:0006145];pyrimidine nucleotide biosynthetic process [GO:0006221]	cytoplasm [GO:0005737]	allantoinase activity [GO:0004038];dihydroorotase activity [GO:0004151];metal ion binding [GO:0046872]	allantoinase activity [GO:0004038];cytoplasm [GO:0005737];dihydroorotase activity [GO:0004151];metal ion binding [GO:0046872];purine nucleobase catabolic process [GO:0006145];pyrimidine nucleotide biosynthetic process [GO:0006221]	441	6	6	6	22.9	48.174	0	8.1295	468410000	59	1	0.249067	0.480725	0.575046	0.262296	1.30206	0.38548	0.457205	0.705959	0.485121	0.300587	0.666414	0.384216	0.310406		0.112712	0.143362	0.115805	0.207521	0.210257	0.204278	0.149378	0.225421	0.200252	0.140522	0.183758	0.136302	0.15436	0.259324	0.202121	0.209775	0.212995
Slr0670 protein	slr0670	P72937	P72937_SYNY3	response to stress [GO:0006950]			response to stress [GO:0006950]	291	18	18	18	77.3	32.676	0	323.31	4189000000	362	1	-0.053893	0.507044	0.614909	0.184396	0.382128	0.720871	0.138285	0.0716286	0.945718	0.028207	0.222874	0.773704	0.0827058		1.51699	2.01619	1.31273	2.05613	1.87778	1.14966	2.06472	1.97082	1.40094	1.96233	1.8164	1.78717	1.70547	1.99823	2.65496	1.63412	1.83845
Extracellular nuclease	nucH	P72938	P72938_SYNY3	cell communication [GO:0007154]	integral component of membrane [GO:0016021]		cell communication [GO:0007154];integral component of membrane [GO:0016021]	1879	23	23	23	24.2	196.53	0	323.31	2185200000	138	1	-0.449831	0.399276	0.550938	0.700616	0.762746	0.444592	0.584105	0.591692	0.434608	0.904687	1.05165	0.0985118	2.36973		0.133315	0.148757	0.126435	0.127505	0.168396	0.117743	0.115787	0.0979706		0.994519	0.170942	0.120916	0.13274	0.113804	1.9549	0.368291	0.163356
Alkaline phosphatase	sll0654	P72939	P72939_SYNY3	nucleotide catabolic process [GO:0009166]		hydrolase activity [GO:0016787]	hydrolase activity [GO:0016787];nucleotide catabolic process [GO:0009166]	1409	35	35	35	36.4	149.39	0	323.31	8600700000	270	1	0.371389	0.0256462	0.963581	0.152618	0.426946	0.548821	1.86575	0.398012	0.544426	1.75053	2.88274	0.0235	5.88911	+		0.333379		0.0539822		0.00355806			0.0881004	2.82054		0.00316425			5.32541	0.826632	0.00387925
Probable adenylyl-sulfate kinase (EC 2.7.1.25) (APS kinase) (ATP adenosine-5'-phosphosulfate 3'-phosphotransferase) (Adenosine-5'-phosphosulfate kinase)	cysC slr0676	P72940	CYSC_SYNY3	hydrogen sulfide biosynthetic process [GO:0070814];sulfate assimilation [GO:0000103]		adenylylsulfate kinase activity [GO:0004020];ATP binding [GO:0005524]	adenylylsulfate kinase activity [GO:0004020];ATP binding [GO:0005524];hydrogen sulfide biosynthetic process [GO:0070814];sulfate assimilation [GO:0000103]	177	13	13	13	72.9	19.674	0	323.31	6542500000	328	1	0.636467	0.993173	0.262027	1.1308	1.24213	0.404198	1.26145	0.613986	0.430068	0.847727	0.690593	0.252524	0.856806		1.26858	6.70545	1.42778	1.84629	7.49811	2.71303	6.15835	6.33039	2.02313	7.13281	7.40389	7.744	3.05924	7.14149	6.75845	8.02342	7.4348
Putative biopolymer transport protein ExbB-like 2	slr0677	P72941	EXBL2_SYNY3	protein import [GO:0017038]	integral component of plasma membrane [GO:0005887]		integral component of plasma membrane [GO:0005887];protein import [GO:0017038]	227	5	5	5	17.2	25.074	0	94.882	972720000	86	1	0.238507	0.654482	0.385314	0.757476	0.618395	0.482213	0.662585	0.0764907	0.908174	0.130887	0.0384059	0.941198	-0.0690943		0.616345	0.816222	0.169396	0.278149	0.729676	0.963066	0.783738	0.625418	0.190134	0.440426	1.17022	0.828848	0.28204	0.978488	0.892171	0.795656	0.830006
Putative biopolymer transport protein ExbD	slr0678	P72942	EXBD_SYNY3	protein transport [GO:0015031]	integral component of membrane [GO:0016021];plasma membrane [GO:0005886]	transmembrane transporter activity [GO:0022857]	integral component of membrane [GO:0016021];plasma membrane [GO:0005886];protein transport [GO:0015031];transmembrane transporter activity [GO:0022857]	269	2	2	2	9.3	28.439	0	49.174	414400000	34	1	0.204061	0.480443	0.451358	1.44591	0.416952	0.562269	1.15164	1.28251	0.265022	2.64324	0.513106	0.330456	1.95577		0.0160956	0.229177		0.143471	0.276975		0.239225	0.152681	0.0114136	0.406428		0.140611	0.117072	0.738529	0.574864	0.166226	0.193217
Slr0680 protein	slr0680	P72944	P72944_SYNY3					140	3	3	3	22.1	15.731	0	18.411	367810000	34	1	-0.445213	0.992527	0.285228	-0.699504	0.704856	0.47153	-0.473355	0.803186	0.373182	-0.644293	1.54553	0.0681974	-0.908574		2.62899	1.23682	2.92304	2.1585	1.25521	1.89501	1.22956	1.83705	1.43454	0.896373	1.29449	1.47937	2.00732	0.725841	0.817161	0.839451	1.69184
OmpR subfamily	sll0649	P72948	P72948_SYNY3	phosphorelay signal transduction system [GO:0000160];regulation of transcription, DNA-templated [GO:0006355];transcription, DNA-templated [GO:0006351]	intracellular [GO:0005622]	DNA binding [GO:0003677]	DNA binding [GO:0003677];intracellular [GO:0005622];phosphorelay signal transduction system [GO:0000160];regulation of transcription, DNA-templated [GO:0006355];transcription, DNA-templated [GO:0006351]	245	5	5	5	26.1	28.428	0	6.5986	216790000	26	1	0.452947	0.162589	0.800417	0.242096	0.0352227	0.952886	0.0603054	0.141995	0.827089	0.220247	0.108384	0.827153	-0.204674		0.208991	0.165206	0.0845396	0.0238847	0.128597	0.129516	0.148223	0.104762	0.164071	0.130568	0.0937903	0.125493	0.0838161	0.169579	0.124016	0.0672099	0.073485
Adenylate cyclase	cyaA	P72951	P72951_SYNY3	cyclic nucleotide biosynthetic process [GO:0009190];intracellular signal transduction [GO:0035556];signal transduction [GO:0007165]	integral component of membrane [GO:0016021];intracellular [GO:0005622];plasma membrane [GO:0005886]	adenylate cyclase activity [GO:0004016];identical protein binding [GO:0042802]	adenylate cyclase activity [GO:0004016];cyclic nucleotide biosynthetic process [GO:0009190];identical protein binding [GO:0042802];integral component of membrane [GO:0016021];intracellular [GO:0005622];intracellular signal transduction [GO:0035556];plasma membrane [GO:0005886];signal transduction [GO:0007165]	756	4	4	4	8.3	82.313	0	4.6294	120360000	27	1	0.243153	0.224098	0.761289	0.195442	0.0419762	0.946945	0.0573908	1.1657	0.274906	0.715152	0.227527	0.70253	0.225711		0.0334467	0.0110664	0.022841		0.0255883	0.0221095	0.053893	0.015613	0.0190679	0.0180491	0.0244061	0.0137558	0.0273953	0.0268567	0.0219702	0.0119646	0.0525886
Esterase	sll0644	P72953	P72953_SYNY3	catabolic process [GO:0009056]		short-chain carboxylesterase activity [GO:0034338]	catabolic process [GO:0009056];short-chain carboxylesterase activity [GO:0034338]	331	3	3	3	10.9	36.408	0	4.1912	28056000	8	1	-1.29635	0.861809	0.297954	-1.06994	0.581518	0.480319	-0.844018	0.579865	0.450766	-0.742673	0.612866	0.285949	-1.02031		0.0135394	0.0622896	0.0550723	0.0410985	0.0133181		0.0139059	0.0311094		0.0136635	0.0104807		0.0466646	0.0118		0.00961976	0.0131226
Urease accessory protein UreG	ureG sll0643	P72955	UREG_SYNY3	nitrogen compound metabolic process [GO:0006807]	cytoplasm [GO:0005737]	GTP binding [GO:0005525];GTPase activity [GO:0003924];nickel cation binding [GO:0016151]	cytoplasm [GO:0005737];GTP binding [GO:0005525];GTPase activity [GO:0003924];nickel cation binding [GO:0016151];nitrogen compound metabolic process [GO:0006807]	206	7	7	7	41.7	22.012	0	22.004	748920000	44	1	0.644907	0.849952	0.360428	0.466296	0.135823	0.860179	-0.145895	0.20885	0.796349	0.160427	0.776217	0.295683	0.399026		0.307554	0.44647	0.354848	0.316621	0.309954	0.479501	0.574008	0.539537	0.442298	0.680502	0.543173	0.552589	0.50933	0.678126	0.23216	0.587645	0.12887
Sll0641 protein	sll0641	P72957	P72957_SYNY3		integral component of membrane [GO:0016021]		integral component of membrane [GO:0016021]	509	3	3	3	6.5	58.509	0.0026441	2.1553	730620000	9	1	-0.402513	1.19045	0.24879	-0.826144	1.95271	0.456154	-0.881015	1.51486	0.257045	-0.880813	2.36144	0.02464	-1.46403	+	0.710551	0.457624	0.609067	0.572334	0.343487	0.505228	0.320955	0.409403	0.734937	0.197767	0.463128	0.445432	0.381875	0.191475	0.147347	0.26523	0.281615
Uncharacterized transporter sll0640	sll0640	P72958	Y640_SYNY3	potassium ion transport [GO:0006813]	integral component of membrane [GO:0016021];plasma membrane [GO:0005886]	cation transmembrane transporter activity [GO:0008324]	cation transmembrane transporter activity [GO:0008324];integral component of membrane [GO:0016021];plasma membrane [GO:0005886];potassium ion transport [GO:0006813]	612	9	9	9	15.2	66.7	0	21.018	435050000	44	1	-0.201813	0.155431	0.885223	0.0616762	0.615765	0.59377	0.206605	0.0263499	0.974066	-0.017973	0.0349476	0.956047	0.0201658		0.172541	0.238496	0.156201	0.158937	0.225614	0.256691	0.177211	0.199062	0.0679017	0.186258	0.217288	0.167343	0.185961	0.22986	0.183632	0.277742	0.215669
Slr0688 protein	slr0688	P72959	P72959_SYNY3					343	3	3	3	8.5	37.956	0.0010701	2.3351	97970000	6	1	-0.0745876	0.328008	0.667551	-0.257322	0.312246	0.67225	0.466191	0.218736	0.766853	0.247531	0.036466	0.948184	0.0374043			0.0567803	0.0493219	0.0644681	0.0386799	0.0530577		0.0427507	0.048107	0.0776092	0.044056		0.0329329	0.0405691	0.0357378	0.0771878
Slr0689 protein	slr0689	P72961	P72961_SYNY3					398	9	9	9	34.9	42.546	0	9.363	115650000	18	1	-1.53397	0.574324	0.413651	-0.984064	0.181027	0.794653	-0.367975	1.08764	0.263845	-1.98047	0.637309	0.261854	-1.18025		0.0131446	0.0904356	0.261444	0.0904917	0.0370939	0.0369548	0.00839265	0.0141721	0.0445507	0.0261612	0.0451974	0.0266352	0.0742159	0.0147845	0.0260819	0.0505382	0.0280276
Sll0639 protein	sll0639	P72962	P72962_SYNY3					417	9	9	9	36.2	45.927	0	152.92	820050000	153	1	0.0942269	1.21163	0.246684	0.801256	0.4646	0.566259	0.509405	1.18857	0.270911	0.723827	1.906	0.0392558	1.13929	+	0.171456	0.164588	0.146602	0.172531	0.382499	0.23555	0.189234	0.0881554	0.193861	0.496812	0.397543	0.280229	0.17841	0.421857	0.523257	0.390019	0.328142
Sll0638 protein	sll0638	P72963	P72963_SYNY3		outer membrane-bounded periplasmic space [GO:0030288]		outer membrane-bounded periplasmic space [GO:0030288]	458	5	5	5	17.5	50.443	0	54.67	263670000	38	1	-0.257733	0.00789391	0.992959	-0.00530376	0.848805	0.426009	-0.527235	0.784964	0.475712	-0.273033	0.394967	0.606398	-0.164634		0.142963	0.11529	0.128414	0.105056	0.190998	0.193621	0.084298	0.0838813	0.134921	0.0941086	0.158119	0.0835034	0.141912	0.158728	0.140194	0.116647	0.118142
Ycf45 protein	ycf45	P72964	P72964_SYNY3			ATP binding [GO:0005524];nucleic acid binding [GO:0003676]	ATP binding [GO:0005524];nucleic acid binding [GO:0003676]	589	15	15	15	34	65.942	0	323.31	1977800000	282	1	0.233427	0.656386	0.471454	0.311476	0.149474	0.863438	0.0926854	0.761365	0.435228	0.375927	0.875621	0.252636	0.413906		0.357523	0.421742	0.24599	0.367121	0.595316	0.45657	0.477854	0.389932	0.415549	0.514938	0.48774	0.445556	0.362932	0.534672	0.565772	0.470778	0.361757
Thiamine-phosphate synthase (TP synthase) (TPS) (EC 2.5.1.3) (Thiamine-phosphate pyrophosphorylase) (TMP pyrophosphorylase) (TMP-PPase)	thiE sll0635	P72965	THIE_SYNY3	thiamine biosynthetic process [GO:0009228];thiamine diphosphate biosynthetic process [GO:0009229]	cytoplasm [GO:0005737]	metal ion binding [GO:0046872];thiamine-phosphate diphosphorylase activity [GO:0004789]	cytoplasm [GO:0005737];metal ion binding [GO:0046872];thiamine biosynthetic process [GO:0009228];thiamine diphosphate biosynthetic process [GO:0009229];thiamine-phosphate diphosphorylase activity [GO:0004789]	343	9	9	9	39.9	37.883	0	68.031	478880000	66	1	-0.195353	0.703926	0.36876	-0.732224	2.90238	0.314667	-1.24751	1.09388	0.26481	-1.11377	1.10786	0.158531	-0.554214		0.302333	0.18439	0.381928	0.361891	0.231475	0.391506	0.126854	0.258313	0.355	0.19899	0.463385	0.218103	0.172788	0.0590846	0.136644	0.105822	0.0809006
Photosystem I biogenesis protein BtpA	btpA sll0634	P72966	BTPA_SYNY3	metabolic process [GO:0008152]		catalytic activity [GO:0003824]	catalytic activity [GO:0003824];metabolic process [GO:0008152]	287	11	11	11	71.1	30.042	0	139.1	1208000000	142	1	0.781827	0.604591	0.407698	0.856576	1.02447	0.391426	1.20815	0.530606	0.474117	0.800527	0.904556	0.157077	1.09999		0.14167	0.732619	0.206265	0.162041	1.13361	0.645508	0.687077	0.733868	0.210763	0.86123	0.796741	0.694949	0.261299	0.893492	0.592174	1.00836	0.79366
Slr0695 protein	slr0695	P72967	P72967_SYNY3					173	10	10	10	49.1	19.049	0	323.31	3218200000	185	1	0.078467	0.0884515	0.92575	-0.0394038	0.259716	0.754105	-0.189715	0.477807	0.682566	0.133507	0.76551	0.593919	-0.0982942		2.96824	2.64916	2.75657	2.90861	3.31527	2.90796	3.77491	3.9534	2.99383	2.1115	2.77057	3.53885	2.3984	3.66097	2.11799	3.06868	1.14678
Slr1590 protein	slr1590	P72968	P72968_SYNY3					295	8	8	8	39.7	32.604	0	200.15	3203000000	141	1	-0.271913	1.26704	0.297545	-0.388164	0.573833	0.578865	-0.262175	1.08411	0.372795	-0.339833	2.13521	0.0574232	-0.556074		3.29028	3.09671	2.42683	2.46969	2.20767	2.83767	2.68634	2.16309	2.53132	1.25873	2.44169	2.41828	2.12914	1.86895	1.49453	2.2852	2.03989
Sll1516 protein	sll1516	P72974	P72974_SYNY3					624	5	5	5	10.9	70.942	0.0010887	2.6987	137810000	6	1	0.391985	0.0619393	0.929455	0.0796206	0.325068	0.675981	-0.359274	0.394294	0.609189	-0.396569	0.175325	0.765706	0.14841		0.0481276	0.0344879	0.022178	0.0317066		0.0347007		0.0335021	0.0635789	0.021585	0.0179619	0.0144497	0.044997	0.0513186	0.0436974	0.0156914
Slr1597 protein	slr1597	P72976	P72976_SYNY3					298	4	4	4	25.2	33.061	0	18.483	109370000	14	1	-0.34093	0.230419	0.74699	-0.249278	0.665792	0.469548	-0.605568	0.256959	0.733648	-0.258287	0.12198	0.810702	-0.200777			0.0761419	0.0587842	0.0570523	0.0979526	0.0315899	0.0284415	0.0755509		0.0872241	0.0409294	0.0257351	0.0808937	0.078701	0.0424348	0.0740846	0.0273388
16.6 kDa small heat shock protein, molecular chaperon	hsp17	P72977	P72977_SYNY3					146	2	2	2	15.8	16.595	0	3.5766	60801000	14	1	-0.657821	0.0337481	0.962285	-0.0380039	0.270174	0.700498	-0.500962	0.145716	0.820442	-0.282678	1.43438	0.0709441	-1.04791		0.0749519	0.0594918	0.0785074	0.0728124	0.042292	0.0524726	0.0863861		0.0576231	0.0173969	0.0532743	0.0937901	0.116886	0.0572423	0.0282656		0.147296
Cytochrome c biogenesis protein CcsA	ccsA sll1513	P72978	CCSA_SYNY3	cytochrome complex assembly [GO:0017004];heme transport [GO:0015886];oxidation-reduction process [GO:0055114]	integral component of membrane [GO:0016021];thylakoid membrane [GO:0042651]	heme binding [GO:0020037]	cytochrome complex assembly [GO:0017004];heme binding [GO:0020037];heme transport [GO:0015886];integral component of membrane [GO:0016021];oxidation-reduction process [GO:0055114];thylakoid membrane [GO:0042651]	334	2	2	2	12.6	36.077	0	90.162	341770000	44	1	0.105127	1.20765	0.360191	0.275936	0.212331	0.835636	0.0898053	1.63557	0.315561	0.316707	1.45174	0.191435	0.295606		0.261161	0.206976	0.198687	0.264516	0.25866	0.292581	0.1893	0.233613	0.249445	0.327751	0.320586	0.234194	0.260882	0.314172	0.310721	0.33319	0.218786
Lipoyl synthase 1 (EC 2.8.1.8) (Lip-syn 1) (Lipoate synthase 1) (Lipoic acid synthase 1) (Sulfur insertion protein lipA1)	lipA1 slr1598	P72980	LIPA1_SYNY3	lipoate biosynthetic process [GO:0009107];protein lipoylation [GO:0009249]	cytoplasm [GO:0005737]	4 iron, 4 sulfur cluster binding [GO:0051539];lipoate synthase activity [GO:0016992];metal ion binding [GO:0046872]	4 iron, 4 sulfur cluster binding [GO:0051539];cytoplasm [GO:0005737];lipoate biosynthetic process [GO:0009107];lipoate synthase activity [GO:0016992];metal ion binding [GO:0046872];protein lipoylation [GO:0009249]	289	4	4	4	20.8	32.485	0	21.043	202920000	28	1	0.660085	0.796143	0.308064	1.19386	0.284049	0.685038	0.566307	0.671471	0.387657	1.09002	1.26134	0.0743195	1.66548		0.0388487	0.145747	0.0387589		0.10499	0.0600208	0.0472659	0.0391374	0.111692	0.257898		0.138004	0.0995712	0.243337	0.177956	0.165915
Slr1600 protein	slr1600	P72985	P72985_SYNY3					149	9	9	9	90.6	17.13	0	155.62	2339000000	111	1	0.285127	1.68007	0.217912	0.576316	0.697776	0.507945	0.351525	0.699728	0.458986	0.373507	0.0664038	0.907605	0.0552258		1.93577	1.77305	1.51139	1.07828	2.27652	2.26045	2.15016	1.64079	1.7883	2.39856	2.36753	2.12797	2.73335	2.91951	2.33414	2.94755	2.73055
UDP-3-O-acyl-N-acetylglucosamine deacetylase (UDP-3-O-acyl-GlcNAc deacetylase) (EC 3.5.1.108) (UDP-3-O-[R-3-hydroxymyristoyl]-N-acetylglucosamine deacetylase)	lpxC sll1508	P72988	LPXC_SYNY3	lipid A biosynthetic process [GO:0009245]		metal ion binding [GO:0046872];UDP-3-O-[3-hydroxymyristoyl] N-acetylglucosamine deacetylase activity [GO:0008759];UDP-3-O-acyl-N-acetylglucosamine deacetylase activity [GO:0103117]	lipid A biosynthetic process [GO:0009245];metal ion binding [GO:0046872];UDP-3-O-[3-hydroxymyristoyl] N-acetylglucosamine deacetylase activity [GO:0008759];UDP-3-O-acyl-N-acetylglucosamine deacetylase activity [GO:0103117]	276	4	4	4	25.4	30.326	0	17.001	75663000	27	1	0.132285	0.130572	0.846953	-0.207071	0.0157852	0.982453	0.024788	0.265227	0.7362	0.211415	2.63046	0.0256818	0.950473	+	0.021677		0.0336249	0.0334449	0.036318		0.0306609	0.0522978	0.0407485	0.0396282	0.00533455		0.0371723	0.0441582	0.0456036		0.0151262
Sll1507 protein	sll1507	P72989	P72989_SYNY3		outer membrane-bounded periplasmic space [GO:0030288]		outer membrane-bounded periplasmic space [GO:0030288]	181	2	2	2	12.2	20.152	0	4.2382	78936000	29	1	0.0249724	0.251252	0.698748	-0.466233	0.780757	0.419953	0.800099	0.360324	0.62544	0.427981	0.125288	0.802852	-0.238564		0.085728		0.0719766	0.064858	0.0845898	0.1013	0.0903234		0.0494184	0.0642202			0.0618652	0.0792539	0.0720176	0.114017	0.0918036
Slr1603 protein	slr1603	P72990	P72990_SYNY3	iron-sulfur cluster assembly [GO:0016226];protein maturation by iron-sulfur cluster transfer [GO:0097428]	integral component of membrane [GO:0016021]	2 iron, 2 sulfur cluster binding [GO:0051537];ferrous iron binding [GO:0008198]	2 iron, 2 sulfur cluster binding [GO:0051537];ferrous iron binding [GO:0008198];integral component of membrane [GO:0016021];iron-sulfur cluster assembly [GO:0016226];protein maturation by iron-sulfur cluster transfer [GO:0097428]	440	4	4	4	11.8	49.215	0	38.564	290450000	70	1	-0.399213	0.42406	0.552437	-0.476404	0.493018	0.55228	-0.554195	0.131413	0.844212	-0.180593	0.19642	0.729912	-0.249514		0.260528	0.121408	0.217799	0.17172	0.040572	0.194037	0.115482	0.0759763	0.162892	0.0433859	0.0984328	0.0959601	0.0778571	0.079938	0.156626	0.0626569	0.118437
ATP-dependent zinc metalloprotease FtsH 3 (EC 3.4.24.-)	ftsH3 slr1604	P72991	FTSH3_SYNY3	photoinhibition [GO:0010205];photosystem II repair [GO:0010206];proteolysis [GO:0006508];PSII associated light-harvesting complex II catabolic process [GO:0010304]	integral component of membrane [GO:0016021];thylakoid membrane [GO:0042651]	ATP binding [GO:0005524];ATP-dependent peptidase activity [GO:0004176];metalloendopeptidase activity [GO:0004222];metallopeptidase activity [GO:0008237];zinc ion binding [GO:0008270]	ATP binding [GO:0005524];ATP-dependent peptidase activity [GO:0004176];integral component of membrane [GO:0016021];metalloendopeptidase activity [GO:0004222];metallopeptidase activity [GO:0008237];photoinhibition [GO:0010205];photosystem II repair [GO:0010206];proteolysis [GO:0006508];PSII associated light-harvesting complex II catabolic process [GO:0010304];thylakoid membrane [GO:0042651];zinc i…	616	46	46	42	67	67.25	0	323.31	35944000000	735	1	-0.168173	1.15084	0.428712	-0.197804	1.33985	0.426797	-0.261695	1.17054	0.481317	-0.177533	0.701729	0.509643	-0.148894		9.57193	7.94658	10.0288	10.53	8.38568	9.09332	7.7304	7.5742	9.74925	7.24493	9.05668	7.8739	8.26017	8.06697	7.14183	8.9906	6.53548
Long-chain-fatty-acid CoA ligase	slr1609	P73004	P73004_SYNY3	metabolic process [GO:0008152]		ligase activity [GO:0016874]	ligase activity [GO:0016874];metabolic process [GO:0008152]	696	25	25	25	58.6	77.663	0	323.31	6123600000	369	1	-0.066633	1.4417	0.356159	-0.241644	1.67811	0.397736	-0.288655	0.788255	0.58385	-0.153593	0.424189	0.695102	-0.0904742		1.76909	1.34307	1.387	1.3673	1.41257	1.69773	1.42587	1.17454	1.55282	1.14438	1.24987	1.29574	1.05451	1.18923	1.35641	1.21295	1.16207
PatA subfamily	slr1041	P73005	P73005_SYNY3	phosphorelay signal transduction system [GO:0000160]	intracellular [GO:0005622]		intracellular [GO:0005622];phosphorelay signal transduction system [GO:0000160]	388	4	4	4	11.9	43.923	0	3.7751	183930000	6	1	-0.0986731	2.1059	0.20381	-1.39808	0.397412	0.629421	-0.408615	0.978905	0.334505	-0.639373	0.334747	0.603762	-0.235254		0.0727207	0.148551	0.163241	0.171031	0.087155	0.056736	0.151233	0.166558	0.153424	0.085163		0.0439309	0.0535256	0.04433	0.0860663	0.157379	0.0564491
Slr1043 protein	slr1043	P73007	P73007_SYNY3	chemotaxis [GO:0006935]	cytosol [GO:0005829]	signal transducer activity [GO:0004871]	chemotaxis [GO:0006935];cytosol [GO:0005829];signal transducer activity [GO:0004871]	187	5	5	5	34.2	20.682	0	39.028	320550000	38	1	-0.574893	0.0618092	0.939415	-0.0443239	0.447628	0.58701	-0.468155	0.276674	0.690919	-0.413453	0.0626076	0.912724	0.0516057		0.260799	0.238033	0.397954	0.442187	0.232423	0.214345	0.276039	0.15857	0.109226	0.337854	0.200279	0.361904	0.255053	0.322512	0.365209	0.217263	0.345365
Methyl-accepting chemotaxis protein	mcpA	P73008	P73008_SYNY3		integral component of membrane [GO:0016021]	signal transducer activity [GO:0004871]	integral component of membrane [GO:0016021];signal transducer activity [GO:0004871]	869	27	27	27	34.6	93.209	0	323.31	6185700000	299	1	-0.022353	0.266818	0.771196	-0.112784	0.549329	0.620741	-0.208595	0.0791236	0.929342	-0.0391531	0.435898	0.588461	-0.162594		1.94465	1.64061	1.56208	1.12446	1.20241	1.84396	1.65433	1.27694	1.37649	1.16302	1.56861	1.60534	1.30719	1.21818	1.13673	1.67983	1.21436
Probable ABC transporter permease protein slr1045	slr1045	P73009;P74083	Y1045_SYNY3		ATP-binding cassette (ABC) transporter complex [GO:0043190]		ATP-binding cassette (ABC) transporter complex [GO:0043190]	263	2	2	2	9.1	28.242	0	9.2069	73517000	24	2	-0.00857291	0.141209	0.836452	-0.186604	0.098058	0.897033	0.0979855	0.361021	0.629296	-0.395267	0.284534	0.657616	-0.201774		0.0428046	0.0989768	0.0756966	0.10499	0.0412983	0.116832	0.0915081	0.0954701	0.0322265	0.0410371	0.129829	0.0932132	0.026554	0.037792	0.0599703	0.051123	0.0636143
Nuclease SbcCD subunit C	sbcC slr1048	P73012	P73012_SYNY3	DNA recombination [GO:0006310];DNA replication [GO:0006260]		endonuclease activity [GO:0004519];exonuclease activity [GO:0004527]	DNA recombination [GO:0006310];DNA replication [GO:0006260];endonuclease activity [GO:0004519];exonuclease activity [GO:0004527]	1006	3	3	3	4.3	116.21	0.0031332	1.9754	136410000	13	1	0.0664269	1.40004	0.247913	-0.570424	0.438463	0.58737	-0.488855	0.496062	0.636695	-0.180593	0.646877	0.456963	-0.210314		0.0165206	0.0226183	0.0289633	0.0183094	0.0167004	0.029212	0.0247135	0.0167429	0.0262524	0.0131287	0.00989135	0.0198596	0.0156876	0.0126136	0.0117907	0.0210727	0.00387925
Enoyl-[acyl-carrier-protein] reductase [NADH] FabI (ENR) (EC 1.3.1.9) (NADH-dependent enoyl-ACP reductase)	fabI envM slr1051	P73016	FABI_SYNY3	fatty acid elongation [GO:0030497];protein homotetramerization [GO:0051289]		enoyl-[acyl-carrier-protein] reductase (NADH) activity [GO:0004318]	enoyl-[acyl-carrier-protein] reductase (NADH) activity [GO:0004318];fatty acid elongation [GO:0030497];protein homotetramerization [GO:0051289]	258	8	8	8	32.6	27.625	0	239.92	3609000000	112	1	-0.213593	1.62377	0.222763	-0.622964	1.56819	0.423096	-0.556395	1.13397	0.335978	-0.468113	2.28636	0.0408	-0.687254	+	3.37529	2.79362	3.03453	1.99326	2.36154	3.28162	2.46834	3.43544	1.22263	1.88828	1.61606	1.97668	1.8888	2.31165	1.11473	2.2489	1.93495
Slr1052 protein	slr1052	P73017	P73017_SYNY3		integral component of membrane [GO:0016021]		integral component of membrane [GO:0016021]	170	2	2	2	17.6	19.47	0	11.925	232940000	40	1	0.139107	0.53373	0.520789	0.334556	1.29391	0.39751	0.707645	0.108233	0.883218	0.110007	0.44882	0.50113	-0.297134		0.0992499	0.192274	0.11628	0.162637	0.223885	0.099023	0.188409	0.340516	0.192628	0.106925	0.143745	0.258328	0.151835	0.276994	0.164949	0.220908	0.172886
Slr1053 protein	slr1053	P73018	P73018_SYNY3					267	3	3	3	16.5	29.848	0	10.663	139710000	37	1	0.275322	0.144782	0.815334	0.294651	0.00424903	0.992689	0.00976009	0.00456206	0.993164	0.012586	0.019439	0.96742	0.0451204		0.143201	0.0812513	0.140571	0.097		0.0790937	0.0705868	0.0851407	0.0789122	0.09405	0.0979088	0.11026	0.0509163	0.0901409	0.0761344	0.0890474	0.0462146
Iron-regulated protein	frpC	P73019	P73019_SYNY3			calcium ion binding [GO:0005509]	calcium ion binding [GO:0005509]	591	11	11	11	28.1	60.483	0	107.12	1056500000	97	1	-0.112773	0.168	0.791581	0.276456	0.252272	0.707748	-0.642575	0.300794	0.649115	-0.749393	0.381419	0.497488	-0.555774		1.27651	0.849234	0.232221	0.135243	0.558925	0.548555	2.336	0.360006	0.315561	0.0884295	0.316457	0.718858	0.553123	0.830946	0.474438	0.358344	0.732395
Mg-chelatase subunit ChlH	chlH	P73020	P73020_SYNY3	chlorophyll biosynthetic process [GO:0015995]		magnesium chelatase activity [GO:0016851]	chlorophyll biosynthetic process [GO:0015995];magnesium chelatase activity [GO:0016851]	1331	51	51	51	43	148.55	0	323.31	11707000000	607	1	0.679887	1.51464	0.197748	1.1326	1.23423	0.412404	1.13889	1.34685	0.257833	1.22471	1.9157	0.0357368	1.34173	+	0.444209	0.528888	0.371046	0.396208	1.54599	0.937316	0.838244	0.721461	0.552326	1.79959	1.43027	0.992596	0.78218	1.76263	1.38223	1.89056	1.40726
Regulatory protein for beta-lactamase	sll1005	P73023	P73023_SYNY3	dATP catabolic process [GO:0046061];dGTP catabolic process [GO:0006203];dTTP catabolic process [GO:0046076];dUTP catabolic process [GO:0046081];TTP catabolic process [GO:0046047];UTP catabolic process [GO:0046052]		nucleoside-triphosphate diphosphatase activity [GO:0047429]	dATP catabolic process [GO:0046061];dGTP catabolic process [GO:0006203];dTTP catabolic process [GO:0046076];dUTP catabolic process [GO:0046081];nucleoside-triphosphate diphosphatase activity [GO:0047429];TTP catabolic process [GO:0046047];UTP catabolic process [GO:0046052]	269	4	4	4	24.9	30.244	0.0010858	2.6266	258970000	5	1	1.15629	0.589904	0.388495	1.35873	1.92043	0.340333	2.35667	1.92055	0.289067	2.21601	1.0867	0.0987714	1.80247		0.0113246	0.0847898	0.0474671		0.0596319		0.0863083	0.0950805		0.317509		0.152109	0.0101997	0.140508	0.355863	0.0967106	0.209554
Sll1004 protein	sll1004	P73024	P73024_SYNY3		integral component of membrane [GO:0016021]		integral component of membrane [GO:0016021]	394	4	4	4	12.4	43.849	0	7.8208	864130000	49	1	-0.081233	0.589985	0.492857	-0.333204	0.47817	0.56272	-0.493495	0.655535	0.480851	-0.358193	3.41394	0.0261176	-1.24643	+	0.464133	0.472025	0.396082	0.36786	0.463399	0.490698	0.509143	0.498475	0.360031	0.248957	0.41431	0.51188	0.367234	0.344942	0.17351	0.420978	0.393761
Ycf22 protein	ycf22	P73029	P73029_SYNY3		integral component of membrane [GO:0016021]		integral component of membrane [GO:0016021]	456	4	4	4	11.6	49.208	0	30.194	94678000	28	1	0.0222779	0.299841	0.67688	-0.310273	0.236703	0.738553	-0.399813	0.24604	0.730058	-0.361286	0.0740092	0.883964	0.10917		0.0758614	0.0348991	0.0347865		0.0133643	0.0532863	0.0375965	0.0313757	0.0184273	0.0263103	0.0253967	0.0258907	0.0294635	0.0301902	0.0164564	0.0450078	0.0104525
Slr1753 protein	slr1753	P73032	P73032_SYNY3					1749	7	7	7	7	185.06	0	50.879	558240000	44	1	-0.491873	0.732886	0.392665	-0.472824	0.8223	0.437231	-0.502355	0.502241	0.532687	-0.446033	2.37876	0.0256	-1.26781	+	0.280099	0.169662	0.227285	0.19864	0.116236	0.123015	0.183384	0.147041	0.161007	0.0849037	0.140047	0.220642	0.165967	0.0793804	0.118988	0.0859664	0.16123
Glycerol-3-phosphate dehydrogenase [NAD(P)+] (EC 1.1.1.94) (NAD(P)H-dependent glycerol-3-phosphate dehydrogenase)	gpsA slr1755	P73033	GPDA_SYNY3	carbohydrate metabolic process [GO:0005975];glycerol-3-phosphate catabolic process [GO:0046168];glycerophospholipid metabolic process [GO:0006650];phospholipid biosynthetic process [GO:0008654]	glycerol-3-phosphate dehydrogenase complex [GO:0009331]	glycerol-3-phosphate dehydrogenase [NAD(P)+] activity [GO:0047952];glycerol-3-phosphate dehydrogenase [NAD+] activity [GO:0004367];glycerol-3-phosphate dehydrogenase [NADP+] activity [GO:0036439];NAD binding [GO:0051287]	carbohydrate metabolic process [GO:0005975];glycerol-3-phosphate catabolic process [GO:0046168];glycerol-3-phosphate dehydrogenase [NAD(P)+] activity [GO:0047952];glycerol-3-phosphate dehydrogenase [NAD+] activity [GO:0004367];glycerol-3-phosphate dehydrogenase [NADP+] activity [GO:0036439];glycerol-3-phosphate dehydrogenase complex [GO:0009331];glycerophospholipid metabolic process [GO:0006650];…	317	11	11	11	52.4	33.511	0	194.63	3222900000	167	1	0.116487	0.579023	0.620927	0.150496	0.0850245	0.92776	0.0359854	0.392588	0.728458	0.124347	1.38629	0.189176	0.312506		1.98468	1.73031	2.0914	1.29283	1.8162	2.01448	1.68967	1.86399	2.05237	1.93921	1.94758	1.87602	1.84852	2.08295	2.01949	1.70092	1.51225
Sll1647 protein	sll1647	P73034	P73034_SYNY3	protein acetylation [GO:0006473]		N-acetyltransferase activity [GO:0008080];transferase activity, transferring acyl groups other than amino-acyl groups [GO:0016747]	N-acetyltransferase activity [GO:0008080];protein acetylation [GO:0006473];transferase activity, transferring acyl groups other than amino-acyl groups [GO:0016747]	172	4	4	4	39	19.576	0	9.539	120410000	37	1	0.043267	0.793076	0.50341	0.202316	2.75239	0.449655	0.483845	0.0537791	0.945084	-0.0485731	0.218263	0.747736	-0.127994		0.0882787	0.0805168	0.0688964	0.0784126	0.0808464	0.101948	0.10105	0.0895287	0.0667815	0.0585564	0.0959138	0.106283	0.10471	0.085961	0.0682131	0.124388	0.103751
Peptidyl-prolyl cis-trans isomerase	ytfC	P73037	P73037_SYNY3		integral component of membrane [GO:0016021];outer membrane-bounded periplasmic space [GO:0030288]	peptidyl-prolyl cis-trans isomerase activity [GO:0003755]	integral component of membrane [GO:0016021];outer membrane-bounded periplasmic space [GO:0030288];peptidyl-prolyl cis-trans isomerase activity [GO:0003755]	201	6	6	6	38.8	21.555	0	161.11	5920400000	252	1	-0.132053	1.39051	0.36431	-0.232984	0.722766	0.585572	-0.179995	0.745408	0.601281	-0.147853	1.51889	0.178243	-0.301074		6.56006	6.08954	7.06247	5.10612	5.9675	6.20447	5.31601	5.19849	6.67419	4.75344	5.57388	5.46181	5.54917	4.9233	4.60976	6.43713	4.63058
Slr1762 protein	slr1762	P73039	P73039_SYNY3	dephosphorylation [GO:0016311];DNA repair [GO:0006281]	cytosol [GO:0005829]	phosphoglycolate phosphatase activity [GO:0008967]	cytosol [GO:0005829];dephosphorylation [GO:0016311];DNA repair [GO:0006281];phosphoglycolate phosphatase activity [GO:0008967]	221	6	6	6	37.6	23.714	0	16.851	461930000	58	1	0.052407	0.158233	0.835618	0.127596	0.347336	0.681095	0.260485	0.821064	0.393066	0.471467	0.737703	0.29694	0.443046		0.266963	0.275025	0.362932	0.168723	0.483078	0.37548	0.382768	0.220171	0.184679	0.445677	0.385281	0.230187	0.243159	0.356315	0.439853	0.500179	0.454891
Slr1763 protein	slr1763	P73040	P73040_SYNY3					400	22	22	22	65	45.355	0	305.38	3767700000	304	1	0.107507	0.706616	0.472091	0.272616	1.47625	0.381291	0.358245	0.596402	0.586917	0.198207	0.497803	0.556688	0.165886		0.949217	1.20433	1.08295	1.0163	1.49716	1.06371	1.44658	1.41902	0.888899	1.40871	1.04636	1.28074	1.20111	1.94926	1.54434	1.39292	1.24134
Glutamate decarboxylase (EC 4.1.1.15)	gad	P73043	P73043_SYNY3	glutamate metabolic process [GO:0006536]		glutamate decarboxylase activity [GO:0004351];pyridoxal phosphate binding [GO:0030170]	glutamate decarboxylase activity [GO:0004351];glutamate metabolic process [GO:0006536];pyridoxal phosphate binding [GO:0030170]	467	13	13	13	34.7	53.041	0	168.5	1557700000	156	1	-0.317233	1.34654	0.245991	-0.611604	0.780515	0.437063	-0.593415	0.757827	0.395419	-0.575093	0.49031	0.456897	-0.349954		0.898948	0.652222	0.608729	0.592599	0.328787	0.486735	0.544024	0.46089	0.579987	0.327206	0.419395	0.387691	0.477566	0.315766	0.340539	0.437974	0.563268
Sll1640 protein	sll1640	P73046	P73046_SYNY3	nitrogen compound metabolic process [GO:0006807]		hydrolase activity, acting on carbon-nitrogen (but not peptide) bonds [GO:0016810]	hydrolase activity, acting on carbon-nitrogen (but not peptide) bonds [GO:0016810];nitrogen compound metabolic process [GO:0006807]	321	3	3	3	13.1	35.589	0	7.0407	76036000	21	1	-0.876252	1.56465	0.2112	-2.35058	1.07598	0.413688	-1.8538	1.03506	0.260554	-2.29994	0.00614885	0.989361	-0.0132213			0.055381	0.132216	0.142371	0.0264613		0.0565058	0.00971341	0.174584	0.0062487		0.00876202	0.00320952	0.00728087	0.0421768		0.0353167
Sll1638 protein	sll1638	P73048	P73048_SYNY3	photosynthesis [GO:0015979]	extrinsic component of membrane [GO:0019898];photosystem II oxygen evolving complex [GO:0009654];plasma membrane-derived thylakoid photosystem II [GO:0030096]	calcium ion binding [GO:0005509]	calcium ion binding [GO:0005509];extrinsic component of membrane [GO:0019898];photosynthesis [GO:0015979];photosystem II oxygen evolving complex [GO:0009654];plasma membrane-derived thylakoid photosystem II [GO:0030096]	149	10	10	10	61.7	16.477	0	205.14	5764000000	210	1	-0.393633	0.288169	0.723501	-0.182624	0.508749	0.574569	-0.356095	0.601742	0.517541	-0.319753	1.02026	0.161814	-0.646154		10.7384	16.6914	7.90613	8.95646	6.80657	3.38958	9.99664	10.5773	7.97228	7.72734	7.10573	12.2074	7.04145	9.39782	7.9922	4.39791	11.2706
Slr1768 protein	slr1768	P73049	P73049_SYNY3		membrane [GO:0016020]		membrane [GO:0016020]	298	7	7	7	18.1	32.828	0	29.734	522260000	21	1	-0.466553	1.53407	0.197516	-1.18146	1.4391	0.402507	-1.11757	1.77689	0.298941	-1.31669	1.87448	0.0370307	-1.32069	+	0.643098	0.440964	0.43298	0.496659	0.180244	0.387054	0.272484	0.34317	0.499963	0.120581	0.246538	0.289168	0.224544	0.129419	0.0884002	0.170958	0.125886
Ferripyochelin binding protein	fbp	P73050	P73050_SYNY3			transferase activity [GO:0016740]	transferase activity [GO:0016740]	190	2	2	2	15.8	19.547	0	4.4744	181570000	20	1	-0.094753	0.690584	0.472484	-0.282844	0.864987	0.470842	-0.316815	0.504146	0.608651	-0.219013	1.79272	0.0691975	-0.621114		0.230176	0.272993	0.16529	0.192486	0.150124	0.211467	0.21137	0.224174	0.168427	0.128058	0.182186	0.215488	0.13084	0.158244	0.138542	0.188106	0.157497
Flavin-dependent thymidylate synthase (FDTS) (EC 2.1.1.148) (FAD-dependent thymidylate synthase) (Thymidylate synthase ThyX) (TS) (TSase)	thyX sll1635	P73053	THYX_SYNY3	dTMP biosynthetic process [GO:0006231];dTTP biosynthetic process [GO:0006235]		flavin adenine dinucleotide binding [GO:0050660];thymidylate synthase (FAD) activity [GO:0050797]	dTMP biosynthetic process [GO:0006231];dTTP biosynthetic process [GO:0006235];flavin adenine dinucleotide binding [GO:0050660];thymidylate synthase (FAD) activity [GO:0050797]	215	8	8	8	45.1	25.066	0	141.85	2180800000	86	1	-0.211073	0.162105	0.869941	-0.0715639	0.114489	0.904253	-0.0542746	0.012936	0.989178	-0.00665306	0.102368	0.876448	-0.0522742		1.30931	1.13755	1.26652	1.20033	0.688452	0.966477	1.0496	0.868136	0.803902	1.05949	1.09512	1.03827	0.995623	1.00683	1.06725	1.14371	0.987871
Histidinol dehydrogenase 1 (HDH 1) (EC 1.1.1.23)	hisD1 hisD slr1848	P73058	HISX1_SYNY3	histidine biosynthetic process [GO:0000105]	cytosol [GO:0005829]	histidinol dehydrogenase activity [GO:0004399];NAD binding [GO:0051287];zinc ion binding [GO:0008270]	cytosol [GO:0005829];histidine biosynthetic process [GO:0000105];histidinol dehydrogenase activity [GO:0004399];NAD binding [GO:0051287];zinc ion binding [GO:0008270]	434	25	25	25	63.8	46.533	0	323.31	7445100000	417	1	0.033867	0.0504788	0.962174	-0.0178639	0.05186	0.954698	-0.0177946	0.191869	0.852156	-0.0647531	1.29387	0.2275	-0.282594		2.93002	2.91548	2.24633	2.22011	2.66794	3.2416	2.9642	2.6052	2.54964	2.0026	2.83291	2.80535	2.29767	2.78915	2.09768	3.09731	2.16699
Mercuric reductase	merA	P73059	P73059_SYNY3	cell redox homeostasis [GO:0045454]	cell [GO:0005623];integral component of membrane [GO:0016021]	electron transfer activity [GO:0009055];flavin adenine dinucleotide binding [GO:0050660];oxidoreductase activity, acting on a sulfur group of donors, NAD(P) as acceptor [GO:0016668]	cell [GO:0005623];cell redox homeostasis [GO:0045454];electron transfer activity [GO:0009055];flavin adenine dinucleotide binding [GO:0050660];integral component of membrane [GO:0016021];oxidoreductase activity, acting on a sulfur group of donors, NAD(P) as acceptor [GO:0016668]	518	3	3	3	7.9	55.715	0	11.871	74371000	13	1	-0.287589	0.444654	0.549298	-0.433439	0.0985519	0.895499	-0.12131	0.253616	0.732749	0.265431	0.393247	0.52252	0.33813				0.0269564	0.0217089	0.0359647			0.0150582	0.0168208	0.0190109	0.00770378	0.0105976	0.0201618	0.0226778	0.0199273	0.0134833	0.0158123
Urease subunit alpha (EC 3.5.1.5) (Urea amidohydrolase subunit alpha)	ureC sll1750	P73061	URE1_SYNY3	urea catabolic process [GO:0043419]	cytoplasm [GO:0005737]	nickel cation binding [GO:0016151];urease activity [GO:0009039]	cytoplasm [GO:0005737];nickel cation binding [GO:0016151];urea catabolic process [GO:0043419];urease activity [GO:0009039]	569	14	14	14	38.1	61.037	0	260.63	3259800000	193	1	-0.156873	1.90953	0.220522	-0.504624	0.923016	0.478067	-0.278095	1.88223	0.257862	-0.542533	1.61393	0.100615	-0.491194		1.77708	1.55308	1.67571	1.49177	1.11847	1.16571	1.55946	1.4656	1.65771	1.01443	1.01416	1.23215	1.25742	0.842954	1.01353	1.11105	1.18533
Sll1946 protein	sll1946	P73065	P73065_SYNY3	protein O-linked glycosylation [GO:0006493]	integral component of membrane [GO:0016021]	mannosyltransferase activity [GO:0000030]	integral component of membrane [GO:0016021];mannosyltransferase activity [GO:0000030];protein O-linked glycosylation [GO:0006493]	825	4	4	4	7.6	92.514	0	6.4192	149760000	31	1	0.369287	0.132741	0.849711	0.173596	0.045639	0.941633	0.0820561	0.717186	0.393068	0.674407	0.592817	0.348989	0.540406		0.0789186	0.0316848	0.0194697	0.0211182	0.0165621	0.0719484	0.0401806	0.0140226	0.0246186	0.061357	0.05648	0.0209382	0.0221718	0.0258396	0.0458699	0.0731711
Ycf23 protein	ycf23	P73066	P73066_SYNY3			catalytic activity [GO:0003824]	catalytic activity [GO:0003824]	248	4	4	4	23.8	25.366	0	186.13	563770000	82	1	0.526567	1.13801	0.283652	0.532496	0.476418	0.611017	0.289245	0.498316	0.589354	0.260247	1.27914	0.106108	0.727006		0.557139	0.419236	0.313464	0.273257	0.613071	0.777227	0.36358	0.599692	0.638426	0.703183	0.544643	0.798785	0.577371	0.480939	0.642823	0.557181	0.60596
1-deoxy-D-xylulose-5-phosphate synthase (EC 2.2.1.7) (1-deoxyxylulose-5-phosphate synthase) (DXP synthase) (DXPS)	dxs sll1945	P73067	DXS_SYNY3	1-deoxy-D-xylulose 5-phosphate biosynthetic process [GO:0052865];terpenoid biosynthetic process [GO:0016114];thiamine biosynthetic process [GO:0009228]		1-deoxy-D-xylulose-5-phosphate synthase activity [GO:0008661];metal ion binding [GO:0046872]	1-deoxy-D-xylulose 5-phosphate biosynthetic process [GO:0052865];1-deoxy-D-xylulose-5-phosphate synthase activity [GO:0008661];metal ion binding [GO:0046872];terpenoid biosynthetic process [GO:0016114];thiamine biosynthetic process [GO:0009228]	640	20	20	20	45.9	69.327	0	235.11	7052500000	272	1	0.439127	1.19722	0.279021	0.521336	1.70735	0.394827	0.652605	1.62245	0.247564	0.599227	1.45421	0.115475	0.499506		1.41589	1.78675	1.20578	0.875651	1.48383	1.93202	2.02517	1.684	1.46662	1.87888	2.11313	2.36834	1.49399	2.36924	1.36282	2.63978	2.28342
Rubredoxin (Rd)	rub slr2033	P73068	RUBR_SYNY3	oxidation-reduction process [GO:0055114]		iron ion binding [GO:0005506]	iron ion binding [GO:0005506];oxidation-reduction process [GO:0055114]	115	5	5	5	68.7	12.57	0	230.2	1687500000	117	1	-0.239113	3.00729	0.224286	-0.434224	1.4444	0.386985	-0.373795	3.60471	0.30025	-0.501893	3.31814	0.036625	-0.469834	+	2.25841	2.4428	2.92203	2.83123	2.53701	1.65486	2.09412	2.69184	2.81472	1.92542	1.8479	2.14114	2.01862	1.75835	1.8307	1.8577	1.55811
Ycf48-like protein	slr2034	P73069	YC48L_SYNY3					342	19	19	19	61.7	37.29	0	323.31	10497000000	289	1	0.0694269	0.314851	0.743724	0.126216	0.416738	0.704805	0.145525	0.316826	0.753846	0.122107	0.046943	0.948119	-0.0214943		4.53219	4.50846	2.90668	4.28718	5.23405	4.8149	4.19899	4.31241	4.39022	4.42897	4.92077	4.25565	4.19006	5.80593	4.0516	4.95648	4.28143
Glutamate 5-kinase (EC 2.7.2.11) (Gamma-glutamyl kinase) (GK)	proB slr2035	P73071	PROB_SYNY3	L-proline biosynthetic process [GO:0055129];proline biosynthetic process [GO:0006561]	cytosol [GO:0005829]	ATP binding [GO:0005524];glutamate 5-kinase activity [GO:0004349];RNA binding [GO:0003723]	ATP binding [GO:0005524];cytosol [GO:0005829];glutamate 5-kinase activity [GO:0004349];L-proline biosynthetic process [GO:0055129];proline biosynthetic process [GO:0006561];RNA binding [GO:0003723]	375	7	7	7	25.1	40.16	0	31.928	366610000	53	1	-0.221413	0.346847	0.674366	-0.212464	0.225443	0.796741	-0.148235	0.378241	0.651946	-0.251813	1.98856	0.0517628	-0.670894		0.17668	0.213386	0.140289	0.120277	0.123701	0.187337	0.136848	0.119982	0.149404	0.079493	0.182262	0.183796	0.0992611	0.126519	0.0895721	0.144098	0.163844
DNA topoisomerase 4 subunit A (EC 5.99.1.3) (Topoisomerase IV subunit A)	parC sll1941	P73077	PARC_SYNY3	DNA topological change [GO:0006265]	chromosome [GO:0005694];plasma membrane [GO:0005886]	ATP binding [GO:0005524];DNA binding [GO:0003677];DNA topoisomerase type II (ATP-hydrolyzing) activity [GO:0003918]	ATP binding [GO:0005524];chromosome [GO:0005694];DNA binding [GO:0003677];DNA topoisomerase type II (ATP-hydrolyzing) activity [GO:0003918];DNA topological change [GO:0006265];plasma membrane [GO:0005886]	920	9	7	7	17.4	101.16	0	45.165	239060000	75	1	0.575787	0.971978	0.316186	0.524776	1.38223	0.404485	0.862925	0.763649	0.388052	0.613667	1.66172	0.0665676	0.777266		0.0204382	0.0315795	0.0321658	0.0148554	0.0415424	0.0407461	0.0416206	0.0379487	0.0361238	0.0405395	0.0443256	0.0377856	0.0287115	0.0368811	0.0445291	0.0792534	0.0580522
Periplasmic binding protein component of an ABC type zinc uptake transporter	zntC	P73085	P73085_SYNY3	metal ion transport [GO:0030001]		metal ion binding [GO:0046872]	metal ion binding [GO:0046872];metal ion transport [GO:0030001]	338	7	7	7	35.8	36.989	0	154.36	566370000	44	1	0.981128	0.00649706	0.992814	0.0214621	0.128792	0.848041	0.338951	0.0278788	0.960912	0.124473	0.00873723	0.985683	0.0245717		0.255981	0.0742654	0.0648015		0.371782	0.0940849	0.246378	1.8065		0.270588	0.0782797	0.10823	0.0189399	0.235864	0.116847	0.122999	0.0993865
Fat protein	slr2046	P73089	P73089_SYNY3	homophilic cell adhesion via plasma membrane adhesion molecules [GO:0007156]	membrane [GO:0016020]	calcium ion binding [GO:0005509]	calcium ion binding [GO:0005509];homophilic cell adhesion via plasma membrane adhesion molecules [GO:0007156];membrane [GO:0016020]	1965	5	5	5	5.9	205.73	0	54.846	127820000	19	1	0.128238	1.14955	0.252055	1.01475	0.848211	0.418343	0.738564	1.35015	0.249826	0.979446	0.156013	0.75683	0.325145			0.0388224	0.0118964	0.0383968	0.0228752		0.0492389	0.0237142	0.0489683	0.0114689	0.0635168	0.0427059		0.0760834	0.0555832	0.0509144	0.0231266
PhoH-like protein	slr2047	P73090	PHOL_SYNY3		cytoplasm [GO:0005737]	ATP binding [GO:0005524]	ATP binding [GO:0005524];cytoplasm [GO:0005737]	328	9	9	9	36.3	36.048	0	52.335	689260000	71	1	0.042707	0.270887	0.748076	-0.150544	0.198886	0.825265	0.118165	0.229378	0.824777	-0.0767931	1.1783	0.155973	-0.495354		0.36732	0.356169	0.3225	0.306345	0.219916	0.388964	0.35952	0.355937	0.321389	0.206036	0.272208	0.344716	0.228628	0.404392	0.194453	0.310339	0.357991
Slr2048 protein	slr2048	P73091	P73091_SYNY3		outer membrane-bounded periplasmic space [GO:0030288]	identical protein binding [GO:0042802]	identical protein binding [GO:0042802];outer membrane-bounded periplasmic space [GO:0030288]	398	6	6	6	23.4	44.256	0	46.443	274090000	31	1	0.207967	0.0955839	0.904405	-0.101304	0.143716	0.852827	-0.144755	0.315487	0.677554	0.298607	0.520898	0.431595	0.386226		0.151744	0.153566	0.188701	0.0878161	0.051837	0.157586	0.203435	0.088241	0.0980045	0.148442	0.163378	0.117838	0.0832314	0.0773222	0.113723	0.102303	0.106417
Chromophore lyase CpcS/CpeS 2 (EC 4.-.-.-)	cpcS2 slr2049	P73092	CPXS2_SYNY3	protein-phycocyanobilin linkage [GO:0017009]		lyase activity [GO:0016829]	lyase activity [GO:0016829];protein-phycocyanobilin linkage [GO:0017009]	192	8	8	8	37.5	21.946	0	50.981	1573900000	88	1	0.00524697	0.246027	0.774858	-0.121564	0.546178	0.693862	0.119685	0.327723	0.748672	-0.124013	1.17963	0.240663	-0.290954		0.83718	0.922317	0.848433	0.853243	1.13432	0.965473	1.08481	0.94822	0.837286	0.776507	1.10595	0.973652	0.873132	0.855848	0.517056	0.838869	1.07177
Phycobilisome rod-core linker polypeptide CpcG	cpcG	P73093	P73093_SYNY3	photosynthesis [GO:0015979]	phycobilisome [GO:0030089]		photosynthesis [GO:0015979];phycobilisome [GO:0030089]	235	33	33	33	96.6	27.392	0	323.31	416990000000	1189	1	-0.289873	1.84086	0.194245	-0.702424	1.47939	0.404698	-0.479655	1.97723	0.261362	-0.561193	2.34354	0.0291379	-1.01813	+	385.052	282.27	333.53	335.328	264.978	323.968	239.593	277.452	349.22	156.831	254.988	224.61	246.727	164.601	121.38	226.618	169.342
Slr2053 protein	slr2053	P73096	P73096_SYNY3			catalytic activity [GO:0003824]	catalytic activity [GO:0003824]	283	4	4	4	26.1	31.923	0	30.823	524990000	50	1	-0.071933	0.113442	0.923707	-0.0322238	0.433841	0.696115	-0.149915	0.29396	0.704722	-0.269833	1.26443	0.108076	-0.723454		0.316288	0.338009	0.357266	0.371911	0.33911	0.303698	0.351195	0.372443	0.322125	0.293386	0.300822	0.385895	0.291966	0.407657	0.3118	0.3133	0.303821
Chaperone protein DnaJ 2	dnaJ2 sll1933	P73097	DNAJ2_SYNY3	DNA replication [GO:0006260];protein folding [GO:0006457]	cytoplasm [GO:0005737]	unfolded protein binding [GO:0051082]	cytoplasm [GO:0005737];DNA replication [GO:0006260];protein folding [GO:0006457];unfolded protein binding [GO:0051082]	307	4	4	4	17.6	34.698	0	34.242	317720000	53	1	0.143047	0.363006	0.706257	0.143596	0.233525	0.785561	-0.164455	0.491957	0.624785	0.199347	0.441314	0.541963	0.216426		0.134112	0.104794	0.185099	0.150176	0.184479	0.23168	0.136743	0.10477	0.202528	0.176015	0.137632	0.184332	0.175309	0.177985	0.149757	0.191275	0.0855786
Chaperone protein dnaK3 (HSP70-3) (Heat shock 70 kDa protein 3) (Heat shock protein 70-3)	dnaK3 sll1932	P73098	DNAK3_SYNY3	protein folding [GO:0006457]		ATP binding [GO:0005524];unfolded protein binding [GO:0051082]	ATP binding [GO:0005524];protein folding [GO:0006457];unfolded protein binding [GO:0051082]	771	32	32	32	50.1	86.029	0	323.31	20556000000	424	1	0.039427	0.201197	0.856133	0.0647962	0.0124538	0.986823	-0.00635462	0.0895802	0.912936	0.0602469	1.37101	0.143824	0.425686		4.29634	2.78472	3.54546	2.81987	3.5026	4.15229	2.8289	2.85639	3.38555	4.22828	3.44782	3.08138	3.47129	3.8775	3.66749	4.16905	2.97336
Slr1908 protein	slr1908	P73103	P73103_SYNY3	carbohydrate transport [GO:0008643]	integral component of membrane [GO:0016021]	porin activity [GO:0015288]	carbohydrate transport [GO:0008643];integral component of membrane [GO:0016021];porin activity [GO:0015288]	591	30	30	21	56.5	64.51	0	323.31	12315000000	635	1	-0.029873	0.211416	0.780812	0.146616	0.525759	0.569004	0.339005	0.25655	0.740205	0.213807	0.370734	0.569216	0.254966		1.74184	2.17021	3.16032	2.2371	3.70308	1.55521	3.33837	2.72942	1.69748	3.70962	1.94758	2.43425	2.4191	3.38094	4.24244	2.30125	2.79354
NarL subfamily	slr1909	P73104	P73104_SYNY3	phosphorelay signal transduction system [GO:0000160];regulation of transcription, DNA-templated [GO:0006355];transcription, DNA-templated [GO:0006351]	intracellular [GO:0005622]	DNA binding [GO:0003677]	DNA binding [GO:0003677];intracellular [GO:0005622];phosphorelay signal transduction system [GO:0000160];regulation of transcription, DNA-templated [GO:0006355];transcription, DNA-templated [GO:0006351]	213	6	6	6	37.1	24.046	0	121.62	1390400000	63	1	-0.092973	0.140625	0.901942	-0.0501439	0.0670581	0.941104	-0.0285946	0.0384738	0.967805	0.0156269	0.182948	0.814466	-0.0644542		1.34734	1.13897	1.07331	0.777723	0.917848	1.03419	0.922898	0.950918	0.990475	0.947614	1.00013	0.95666	0.982529	1.01722	1.0334	0.948564	0.912941
Sll1837 protein	sll1837	P73107	P73107_SYNY3		outer membrane-bounded periplasmic space [GO:0030288]		outer membrane-bounded periplasmic space [GO:0030288]	145	7	7	7	45.5	15.467	0	53.205	898430000	65	1	-0.281513	0.556633	0.528887	-0.280124	0.854181	0.431148	-0.496015	0.0187198	0.981328	0.0139469	1.44192	0.0802308	-0.814134		1.67077	1.02196	1.4406	0.955037	1.59652	1.33858	1.3865	1.1721	0.489165	1.32857	1.18895	0.944275	1.32912	1.33443	0.713405	1.27405	0.687625
Sll1835 protein	sll1835	P73111	P73111_SYNY3		outer membrane-bounded periplasmic space [GO:0030288]		outer membrane-bounded periplasmic space [GO:0030288]	265	11	11	11	70.9	28.832	0	323.31	5333200000	253	1	0.468047	1.5304	0.220431	0.800116	1.28341	0.39556	0.588105	1.74327	0.258758	0.568887	0.579915	0.444694	0.274806		2.76487	1.91884	2.11972	1.38322	2.53648	3.97432	4.22351	2.48991	1.7665	2.7062	5.43652	4.89659	3.20111	3.58513	2.06722	4.96095	2.72734
Penicillin-binding protein	ftsI	P73117	P73117_SYNY3		integral component of membrane [GO:0016021]	penicillin binding [GO:0008658]	integral component of membrane [GO:0016021];penicillin binding [GO:0008658]	607	12	12	12	24.9	66.631	0	39.928	424430000	62	1	0.767307	0.985821	0.279977	0.831156	0.916054	0.398726	0.827426	0.753017	0.371308	0.842787	1.67267	0.046431	1.22109	+	0.0272351	0.0263333	0.0558605	0.0329205	0.0926816	0.0704043	0.0782287	0.0426176	0.0742118	0.10025	0.056928	0.0472048	0.060613	0.0943277	0.141806	0.106507	0.0907344
Sll1830 protein	sll1830	P73120	P73120_SYNY3					358	19	19	19	53.4	39.648	0	323.31	7113400000	391	1	0.0634069	0.473616	0.615747	-0.202944	0.828152	0.662384	-0.116135	0.64176	0.651179	0.125547	0.201668	0.728745	-0.233374		3.69893	3.32426	3.74917	3.97245	3.40611	4.80224	4.09381	4.02418	4.08204	2.40622	4.498	3.31884	3.56938	2.88871	2.00568	3.47887	3.45646
Uncharacterized protein slr1919	slr1919	P73121	Y1919_SYNY3			ATP binding [GO:0005524];protein kinase activity [GO:0004672]	ATP binding [GO:0005524];protein kinase activity [GO:0004672]	566	11	11	11	21.6	65.078	0	38.641	1685500000	78	1	0.039247	0.0771849	0.920045	-0.0784638	0.578225	0.533964	0.403845	0.41407	0.608574	-0.345733	0.798149	0.239882	-0.595254		0.312128	0.749829	0.325059	0.388431	0.358123	0.685727	0.634083	0.453726	0.364248	0.168728	0.596289	0.610972	0.35443	0.272821	0.228885	0.708636	0.570538
Probable RuBisCO transcriptional regulator	rbcR sll0998	P73123	RBCR_SYNY3	transcription, DNA-templated [GO:0006351]		DNA binding [GO:0003677];DNA binding transcription factor activity [GO:0003700]	DNA binding [GO:0003677];DNA binding transcription factor activity [GO:0003700];transcription, DNA-templated [GO:0006351]	345	13	13	13	43.8	38.017	0	250.21	3036300000	194	1	0.016987	0.882987	0.645357	-0.0980239	0.0763442	0.932359	0.0353654	0.407108	0.767687	-0.0853331	1.12223	0.316563	-0.220814		1.31952	1.40214	1.22567	1.15471	1.30607	1.38964	1.20284	1.42069	1.24884	1.22312	1.10243	1.25935	1.17974	1.20558	1.2331	1.73594	0.957732
Probable thylakoid lumen protein sll0997	sll0997	P73126	Y997_SYNY3		thylakoid lumen [GO:0031977]		thylakoid lumen [GO:0031977]	339	5	5	5	16.5	37.962	0	28.756	399640000	29	1	-0.988064	0.187199	0.770006	-0.311624	0.0458401	0.941639	-0.0773346	1.2972	0.254752	-1.19401	0.945357	0.126646	-1.81537		0.15366	0.273959	0.0854469	0.385053	0.429648	0.141014	0.28439	0.187335		0.250238	0.189187	0.206209	0.0937896	0.603751	0.0914795	0.131034	0.233694
tRNA-2-methylthio-N(6)-dimethylallyladenosine synthase (EC 2.8.4.3) ((Dimethylallyl)adenosine tRNA methylthiotransferase MiaB) (tRNA-i(6)A37 methylthiotransferase)	miaB sll0996	P73127	MIAB_SYNY3	tRNA modification [GO:0006400]	cytoplasm [GO:0005737]	4 iron, 4 sulfur cluster binding [GO:0051539];metal ion binding [GO:0046872];transferase activity [GO:0016740]	4 iron, 4 sulfur cluster binding [GO:0051539];cytoplasm [GO:0005737];metal ion binding [GO:0046872];transferase activity [GO:0016740];tRNA modification [GO:0006400]	451	8	8	8	23.3	50.956	0	95.886	475600000	72	1	1.24067	2.18185	0.167385	2.1834	2.00845	0.393778	2.04059	2.10254	0.330222	2.07091	2.28314	0.0262545	2.22257	+	0.0198834	0.0277751	0.0213026	0.0385915	0.14975	0.0878756	0.0954337	0.0752948	0.0344749	0.230138	0.14959	0.159495	0.089751	0.27043	0.227004	0.199868	0.193472
Sulfolipid biosynthesis protein SqdB	sqdB	P73128	P73128_SYNY3			catalytic activity [GO:0003824];coenzyme binding [GO:0050662]	catalytic activity [GO:0003824];coenzyme binding [GO:0050662]	383	25	25	25	70	43.202	0	323.31	30833000000	637	1	0.044107	0.243715	0.891762	0.0370761	0.523543	0.782906	0.0695254	0.394347	0.797612	0.0683868	0.0582196	0.95543	-0.0118342		9.62382	10.7208	10.6182	12.2935	11.152	11.0365	11.4815	13.1957	10.5949	9.87836	10.42	11.5329	11.4492	11.1404	11.1424	11.4646	11.9488
Sll0995 protein	sll0995	P73130	P73130_SYNY3					231	3	3	3	20.3	26.229	0	65.989	340100000	36	1	-0.137413	0.587686	0.423412	-0.674244	0.266627	0.715022	-0.351815	0.132155	0.842842	-0.189353	0.106281	0.841103	-0.137494		0.406833	0.104911	0.374146	0.374809	0.110034	0.301203	0.229974	0.233824	0.134129	0.188296	0.0908407	0.172561	0.22584	0.079999	0.224734	0.213827	0.141394
Acetylornithine aminotransferase (ACOAT) (EC 2.6.1.11)	argD slr1022	P73133	ARGD_SYNY3	arginine biosynthetic process [GO:0006526]	cytoplasm [GO:0005737]	identical protein binding [GO:0042802];N2-acetyl-L-ornithine:2-oxoglutarate 5-aminotransferase activity [GO:0003992];pyridoxal phosphate binding [GO:0030170]	arginine biosynthetic process [GO:0006526];cytoplasm [GO:0005737];identical protein binding [GO:0042802];N2-acetyl-L-ornithine:2-oxoglutarate 5-aminotransferase activity [GO:0003992];pyridoxal phosphate binding [GO:0030170]	429	28	28	28	85.3	46.567	0	323.31	11085000000	561	1	0.315907	2.49485	0.21728	0.771716	1.22621	0.393327	0.577765	1.76928	0.263478	0.689227	3.02296	0.0267692	0.912686	+	1.89187	1.63448	1.77814	1.62544	3.03065	2.44648	2.16361	1.95219	2.45427	3.19202	3.39658	2.85122	2.94828	3.59883	3.82376	3.61806	3.28568
Slr1024 protein	slr1024	P73135	P73135_SYNY3					213	3	3	3	18.3	23.648	0	38.026	488690000	63	1	0.00742695	0.309529	0.789419	0.0777561	0.651434	0.662944	0.137145	0.246585	0.821266	-0.0742331	0.72931	0.451343	-0.191754		0.522213	0.466916	0.403173	0.378123	0.431857	0.492709	0.449858	0.43733	0.343383	0.494853	0.511456	0.507746	0.392203	0.463591	0.445128	0.513743	0.445221
S-(hydroxymethyl)glutathione dehydrogenase (EC 1.1.1.284) (Alcohol dehydrogenase class-3) (EC 1.1.1.1) (Alcohol dehydrogenase class-III) (Glutathione-dependent formaldehyde dehydrogenase) (FALDH) (FDH) (GSH-FDH) (EC 1.1.1.-)	frmA sll0990	P73138	FRMA_SYNY3	ethanol oxidation [GO:0006069]	cytoplasm [GO:0005737]	alcohol dehydrogenase (NAD) activity [GO:0004022];S-(hydroxymethyl)glutathione dehydrogenase activity [GO:0051903];zinc ion binding [GO:0008270]	alcohol dehydrogenase (NAD) activity [GO:0004022];cytoplasm [GO:0005737];ethanol oxidation [GO:0006069];S-(hydroxymethyl)glutathione dehydrogenase activity [GO:0051903];zinc ion binding [GO:0008270]	369	4	4	4	13.6	39.21	0	31.35	628400000	42	1	-0.599153	1.22248	0.28496	-0.439224	1.0586	0.4128	-0.460935	0.898954	0.338869	-0.792333	2.64969	0.0247917	-0.912874	+	0.356089	0.463658	0.498813	0.473859	0.283659	0.332426	0.376271	0.133563	0.397904	0.208768	0.370458	0.367389	0.282666	0.260296	0.241232	0.28346	0.23773
Tyrosine--tRNA ligase (EC 6.1.1.1) (Tyrosyl-tRNA synthetase) (TyrRS)	tyrS slr1031	P73141	SYY_SYNY3	tRNA aminoacylation [GO:0043039];tyrosyl-tRNA aminoacylation [GO:0006437]	cytosol [GO:0005829]	ATP binding [GO:0005524];RNA binding [GO:0003723];tyrosine-tRNA ligase activity [GO:0004831]	ATP binding [GO:0005524];cytosol [GO:0005829];RNA binding [GO:0003723];tRNA aminoacylation [GO:0043039];tyrosine-tRNA ligase activity [GO:0004831];tyrosyl-tRNA aminoacylation [GO:0006437]	404	13	13	13	46	44.901	0	96.816	1691900000	165	2	0.067547	0.266795	0.772267	0.110276	0.636373	0.633239	0.159645	0.336537	0.777707	0.0925069	0.436379	0.651241	-0.110614		0.620761	0.591986	0.604398	0.648298	0.834814	0.750699	0.630227	0.657924	0.755337	0.646119	0.820561	0.826438	0.593028	0.84723	0.51702	0.786227	0.601524
Slr1033 protein	slr1033	P73143	P73143_SYNY3					565	2	2	2	4.2	64.181	0	3.2842	36059000	11	1	-0.2083	0.47568	0.549088	-0.350022	0.195062	0.796959	0.22274	0.170915	0.821914	-0.13537	0.128054	0.813163	-0.142311			0.00912749		0.0109785	0.00800062			0.0123127		0.0149965		0.0140244		0.00809937	0.00644633	0.0121241	0.00726457
Thylakoid-associated single-stranded DNA-binding protein slr1034 (Thylakoid-associated SSB)	slr1034	P73145	SSB2_SYNY3		thylakoid membrane [GO:0042651]	single-stranded DNA binding [GO:0003697]	single-stranded DNA binding [GO:0003697];thylakoid membrane [GO:0042651]	129	3	3	3	45.7	14.408	0	21.282	590220000	15	1	0.453347	0.134472	0.854279	-0.151324	0.0372874	0.949175	0.0683855	0.0158828	0.982242	0.020867	0.00721798	0.988002	-0.0101142		0.782742	0.678083	1.01261	0.649963	0.252198	0.525553	1.49977	0.952105	0.800011	0.706162	0.420443	1.03145	0.50058	0.370649	0.648057	0.930267	1.03871
Slr1035 protein	slr1035	P73146	P73146_SYNY3					175	3	3	3	27.4	19.903	0	9.4675	115920000	31	1	1.5601	0.850645	0.28369	1.60893	0.282854	0.678854	0.719721	0.337355	0.614812	0.83504	0.391144	0.459565	0.937158		0.166814	0.0934044	0.00921738		0.0148091	0.0662657	0.235736	0.0656616	0.0274527	0.135491	0.0626597	0.16465	0.0748046	0.0387765	0.150997	0.0182333	0.155933
CheY subfamily	slr1037	P73150	P73150_SYNY3	phosphorelay signal transduction system [GO:0000160]	intracellular [GO:0005622]		intracellular [GO:0005622];phosphorelay signal transduction system [GO:0000160]	131	2	2	2	22.9	14.322	0.0010758	2.4553	62141000	4	1	0.561059	0.64913	0.367653	1.14329	0.0235469	0.967171	-0.0756298	0.788365	0.340546	1.34337	0.555167	0.330189	0.942615		0.109402	0.0743787	0.0824333				0.117729	0.0752635	0.0467591	0.0711235	0.0597086	0.0751636		0.182811	0.1037		0.0978282
Uncharacterized thylakoid-associated protein sll0982	sll0982	P73152	Y982_SYNY3		thylakoid membrane [GO:0042651]		thylakoid membrane [GO:0042651]	128	5	5	5	49.2	14.283	0	18.279	171380000	23	1	-0.0759336	0.00234397	0.997748	-0.00658453	0.00969534	0.986219	0.0249248	0.181748	0.78264	-0.409314	0.500144	0.371775	0.963265		0.312713	0.277437	0.0664251	0.103409		0.0977952	0.200621	0.0651448	0.0599371	0.0744993	0.180214	0.14706	0.0361408	0.0623843	0.121463	0.114524	0.0539099
Probable signal peptidase I-2 (SPase I-2) (EC 3.4.21.89) (Leader peptidase I-2)	lepB2 slr1377	P73157	LEP2_SYNY3		integral component of membrane [GO:0016021];plasma membrane [GO:0005886]	serine-type peptidase activity [GO:0008236]	integral component of membrane [GO:0016021];plasma membrane [GO:0005886];serine-type peptidase activity [GO:0008236]	218	3	3	3	20.6	24.733	0	15.397	636090000	48	1	0.063187	0.605397	0.394894	0.989696	0.694911	0.427694	1.16285	0.197034	0.758362	0.546807	0.0630362	0.89302	-0.182054		0.462014	0.280318	0.282627	0.0220455	0.280997	0.539542	0.268267	0.0276188	0.23527	0.300112	0.453817	0.471614	0.295775	0.323385	0.342006	0.707458	0.57379
Slr1378 protein	slr1378	P73158	P73158_SYNY3					237	2	2	2	16.5	26.989	0	13.263	69947000	30	1	0.0173505	0.964649	0.301853	-0.641104	0.00918397	0.986745	0.0124035	0.270747	0.71943	0.281647	1.18872	0.111685	0.815126		0.0146405	0.0224558	0.0461691	0.0496325	0.0252133		0.0299634	0.0202546	0.0570825	0.0318817	0.0201886	0.0239021	0.0150569	0.0186682	0.0151808		0.0189415
tRNA (guanine-N(7)-)-methyltransferase (EC 2.1.1.33) (tRNA (guanine(46)-N(7))-methyltransferase) (tRNA(m7G46)-methyltransferase)	trmB sll1300	P73161	TRMB_SYNY3	RNA (guanine-N7)-methylation [GO:0036265]	tRNA methyltransferase complex [GO:0043527]	tRNA (guanine-N7-)-methyltransferase activity [GO:0008176]	RNA (guanine-N7)-methylation [GO:0036265];tRNA (guanine-N7-)-methyltransferase activity [GO:0008176];tRNA methyltransferase complex [GO:0043527]	211	3	3	3	17.5	24.416	0	19.62	259480000	50	1	0.254787	0.201563	0.777481	0.176196	0.211569	0.794545	0.180085	0.496689	0.561823	0.351987	0.039649	0.944022	-0.0387542		0.148858	0.224492	0.143376	0.0837091	0.307174	0.235094	0.211517	0.237861	0.159894	0.157527	0.205724	0.208075	0.156841	0.243151	0.138984	0.215912	0.137147
Acetate kinase (EC 2.7.2.1) (Acetokinase)	ackA sll1299	P73162	ACKA_SYNY3	acetyl-CoA biosynthetic process [GO:0006085];organic acid metabolic process [GO:0006082]	cytoplasm [GO:0005737]	acetate kinase activity [GO:0008776];ATP binding [GO:0005524];metal ion binding [GO:0046872]	acetate kinase activity [GO:0008776];acetyl-CoA biosynthetic process [GO:0006085];ATP binding [GO:0005524];cytoplasm [GO:0005737];metal ion binding [GO:0046872];organic acid metabolic process [GO:0006082]	413	6	6	6	22.8	44.761	0	23.948	293510000	67	1	-0.0732931	1.0042	0.2855	-0.679144	0.669176	0.471522	-0.553275	0.72349	0.412212	-0.550373	0.325977	0.609082	-0.235934		0.218137	0.12575	0.209087	0.170581	0.0690999	0.134904	0.129242	0.131269	0.179169	0.127881	0.102955	0.0921085	0.0688629	0.0687225	0.143129	0.133584	0.079964
Putative carboxymethylenebutenolidase (EC 3.1.1.45) (Dienelactone hydrolase) (DLH)	sll1298	P73163	DLHH_SYNY3			carboxymethylenebutenolidase activity [GO:0008806]	carboxymethylenebutenolidase activity [GO:0008806]	246	6	6	6	22.8	26.941	0	61.267	1969600000	145	1	-0.376853	1.1317	0.25495	-0.770624	1.57553	0.393579	-0.774135	0.780153	0.413481	-0.446893	1.13521	0.163063	-0.498714		3.06654	1.8687	2.91051	2.3035	1.34157	1.86996	1.81811	2.02496	1.51005	1.34301	1.54926	1.43911	1.92822	0.570155	1.45507	1.49891	1.59283
Slr1385 protein	slr1385	P73168	P73168_SYNY3	regulation of transcription, DNA-templated [GO:0006355]			regulation of transcription, DNA-templated [GO:0006355]	322	13	13	13	38.8	35.64	0	90.346	1703400000	149	1	-0.268233	1.045	0.295845	-0.566604	0.818264	0.420213	-0.659415	0.88169	0.366948	-0.529193	1.37578	0.102058	-0.644574		1.85447	1.638	1.18943	1.0672	0.815709	1.38444	1.47789	1.29962	0.793	0.588727	0.576616	1.34414	0.791341	0.75525	0.952897	0.632272	0.7356
CheA like protein	sll1296	P73172	P73172_SYNY3	chemotaxis [GO:0006935]	cytoplasm [GO:0005737]	phosphorelay sensor kinase activity [GO:0000155]	chemotaxis [GO:0006935];cytoplasm [GO:0005737];phosphorelay sensor kinase activity [GO:0000155]	924	11	11	11	17.9	101.71	0	157.52	701420000	65	1	1.19977	1.20469	0.230391	1.31698	1.13121	0.399123	1.15781	1.2563	0.256588	1.45787	2.69334	0.0252727	2.53449	+	0.0182914	0.0224403	0.0506874	0.0256043	0.118785	0.053944	0.0676926	0.0587769	0.0872617	0.216055	0.0622614	0.0739236	0.0759594	0.0721741	0.240731	0.11532	0.0807269
PilJ protein	pilJ	P73173	P73173_SYNY3	chemotaxis [GO:0006935]	integral component of membrane [GO:0016021]	signal transducer activity [GO:0004871]	chemotaxis [GO:0006935];integral component of membrane [GO:0016021];signal transducer activity [GO:0004871]	953	49	49	49	61.2	103.18	0	323.31	9631600000	636	1	0.224267	0.98318	0.349618	0.385856	0.726312	0.512152	0.319905	0.641927	0.468529	0.419007	2.49361	0.0252821	1.17753	+	1.03012	0.973622	0.946498	0.852061	0.897091	1.14093	0.958894	0.701927	1.11026	1.85147	1.30241	0.942444	1.03596	1.04676	2.07627	1.86234	1.0508
Sll1293 protein	sll1293	P73174	P73174_SYNY3	chemotaxis [GO:0006935]	cytosol [GO:0005829]	signal transducer activity [GO:0004871]	chemotaxis [GO:0006935];cytosol [GO:0005829];signal transducer activity [GO:0004871]	155	3	3	3	38.1	16.885	0	130.4	215550000	17	1	0.167547	0.88416	0.324233	0.595776	1.13323	0.418929	0.332945	1.13467	0.30528	0.575287	1.77162	0.0409072	1.30185	+	0.0821104	0.0694556	0.0841071	0.064352	0.0791332	0.0683321	0.0649441	0.0592432	0.0798808	0.207873	0.0764671	0.0856014	0.0751737	0.153917	0.254263	0.120418	0.119046
CheY subfamily	sll1292	P73175	P73175_SYNY3	phosphorelay signal transduction system [GO:0000160]	intracellular [GO:0005622]		intracellular [GO:0005622];phosphorelay signal transduction system [GO:0000160]	121	6	6	6	55.4	13.685	0	48.868	636930000	28	1	-0.068733	0.0417705	0.953722	0.0546561	0.733292	0.452258	0.562225	0.00726155	0.991459	0.0118269	0.383573	0.511738	0.419246		0.18902	0.781617	0.624932	0.448671	0.774817	0.570582	0.539593	0.826676	0.193767	0.512872	0.5163	0.530005	0.273416	0.679821	0.76265	0.788956	0.850094
PatA subfamily	sll1291	P73176	P73176_SYNY3	phosphorelay signal transduction system [GO:0000160]	intracellular [GO:0005622]		intracellular [GO:0005622];phosphorelay signal transduction system [GO:0000160]	401	5	5	5	11.2	44.66	0	51.978	527920000	40	1	0.087147	0.0641969	0.94223	0.0342362	0.231754	0.80157	-0.126155	0.0660918	0.930622	-0.0537931	0.804491	0.274721	0.428206		0.229443	0.159258	0.238634	0.165905	0.137884	0.215015	0.168888	0.198869	0.20138	0.185523	0.212257	0.155596	0.191441	0.15599	0.227729	0.197171	0.110928
Uncharacterized ribonuclease sll1290 (EC 3.1.-.-)	sll1290	P73177	RN2H_SYNY3	RNA catabolic process [GO:0006401];rRNA processing [GO:0006364]	exosome (RNase complex) [GO:0000178];P-body [GO:0000932]	3'-5'-exoribonuclease activity [GO:0000175]	3'-5'-exoribonuclease activity [GO:0000175];exosome (RNase complex) [GO:0000178];P-body [GO:0000932];RNA catabolic process [GO:0006401];rRNA processing [GO:0006364]	666	15	15	15	30.8	75.801	0	83.136	1051500000	138	1	0.098007	0.667068	0.425025	0.434096	0.191339	0.801636	0.192785	0.0923657	0.894237	0.0990469	0.892455	0.214979	0.547746		0.149997	0.166136	0.149516	0.0758519	0.252198	0.167683	0.166737	0.113023	0.121287	0.26119	0.163956	0.203539	0.148185	0.27182	0.238704	0.268951	0.166604
Sll1289 protein	sll1289	P73178	P73178_SYNY3	cell redox homeostasis [GO:0045454]	cell [GO:0005623]	antioxidant activity [GO:0016209];oxidoreductase activity [GO:0016491]	antioxidant activity [GO:0016209];cell [GO:0005623];cell redox homeostasis [GO:0045454];oxidoreductase activity [GO:0016491]	194	2	2	2	18	21.221	0	49.877	636690000	32	1	-0.357953	1.25097	0.361386	-0.262144	1.08944	0.434203	-0.314715	0.394964	0.691928	-0.157053	0.284045	0.711342	0.121186		0.500732	0.359867	0.479623	0.413577	0.552799	0.377751	0.203562	0.331112	0.467064	0.480554	0.392587	0.337434	0.388658	0.387032	0.399729	0.423319	0.296334
ATP-dependent zinc metalloprotease FtsH 1 (EC 3.4.24.-)	ftsH1 slr1390	P73179	FTSH1_SYNY3	photoinhibition [GO:0010205];photosystem II repair [GO:0010206];proteolysis [GO:0006508];PSII associated light-harvesting complex II catabolic process [GO:0010304]	integral component of membrane [GO:0016021];thylakoid membrane [GO:0042651]	ATP binding [GO:0005524];ATP-dependent peptidase activity [GO:0004176];metal ion binding [GO:0046872];metalloendopeptidase activity [GO:0004222];metallopeptidase activity [GO:0008237]	ATP binding [GO:0005524];ATP-dependent peptidase activity [GO:0004176];integral component of membrane [GO:0016021];metal ion binding [GO:0046872];metalloendopeptidase activity [GO:0004222];metallopeptidase activity [GO:0008237];photoinhibition [GO:0010205];photosystem II repair [GO:0010206];proteolysis [GO:0006508];PSII associated light-harvesting complex II catabolic process [GO:0010304];thylako…	665	21	18	18	42.4	72.109	0	323.31	2470800000	214	1	0.071167	0.265375	0.747997	0.155016	0.176243	0.850272	0.0925654	0.765587	0.441979	0.352747	2.47659	0.0349231	0.773926	+	0.293536	0.288099	0.394821	0.360664	0.508326	0.245792	0.317195	0.415463	0.496612	0.486992	0.274387	0.42085	0.339027	0.442616	0.604533	0.407513	0.329099
Fe(2+) transporter FeoB (Ferrous iron transport protein B homolog)	feoB slr1392	P73182	FEOB_SYNY3	iron ion homeostasis [GO:0055072]	integral component of membrane [GO:0016021];plasma membrane [GO:0005886]	ferrous iron transmembrane transporter activity [GO:0015093];GTP binding [GO:0005525]	ferrous iron transmembrane transporter activity [GO:0015093];GTP binding [GO:0005525];integral component of membrane [GO:0016021];iron ion homeostasis [GO:0055072];plasma membrane [GO:0005886]	614	3	3	3	5.5	67.404	0.0036176	1.8401	905870000	13	1	0.375407	0.178704	0.776811	0.302476	0.0708123	0.909708	-0.233775	0.503623	0.480643	-0.970513	0.47339	0.395538	-0.911234		0.553521	0.78629	0.354504	0.239555	0.092984	0.496893	0.595859	0.107909	0.952831	0.41468	0.455898	0.601768	0.149993	0.733377	0.324883	0.480969	0.0257335
Sensory transduction histidine kinase	slr1393	P73184	P73184_SYNY3	protein-chromophore linkage [GO:0018298]	intracellular [GO:0005622]	phosphorelay sensor kinase activity [GO:0000155]	intracellular [GO:0005622];phosphorelay sensor kinase activity [GO:0000155];protein-chromophore linkage [GO:0018298]	974	2	2	2	2.8	109.53	0.0080727	1.4842	27597000	1	1	-0.494046	0.00725783	0.993356	0.0120072	0.365759	0.670415	-0.272795	0.551532	0.458993	-0.840953	0.963661	0.146554	-0.971843		0.0164247	0.011172	0.00927634	0.00718612		0.0126687	0.00841771	0.00652817	0.00931965	0.00402351		0.00380993	0.00634736				0.00503844
Slr1394 protein	slr1394	P73185	P73185_SYNY3		integral component of membrane [GO:0016021]		integral component of membrane [GO:0016021]	151	2	2	2	17.9	15.996	0	4.657	172430000	20	1	0.124947	0.662949	0.388558	-0.680604	1.01196	0.416333	-0.456835	1.05552	0.335904	-0.522533	1.91147	0.0407312	-1.04931	+	0.33409	0.253619	0.264928	0.262871	0.260062	0.465905	0.376453	0.238605	0.312232	0.181089	0.268945	0.254331	0.280986	0.0443453	0.170211	0.201691	0.14549
Slr1395 protein	slr1395	P73187	P73187_SYNY3					358	4	4	4	9.8	40.525	0	30.633	242930000	54	1	-0.129313	0.794087	0.365979	-0.506964	0.338475	0.685411	-0.261295	0.76201	0.429884	-0.407013	1.07967	0.147986	-0.649034		0.137291	0.0904732	0.126357	0.24802	0.224584	0.109569	0.147567	0.126	0.224423	0.122145	0.0711143	0.121858	0.156591	0.106589	0.104299	0.0855325	0.161857
Slr1397 protein	slr1397	P73189	P73189_SYNY3					207	4	4	4	21.7	22.967	0	35.819	296180000	64	1	-0.369273	1.03165	0.347132	-0.362184	0.0537822	0.939221	-0.0497145	0.395061	0.583873	-0.572633	1.0344	0.160282	-0.632974		0.277587	0.268619	0.35645	0.274262	0.213503	0.266039	0.337964	0.0970178	0.249445	0.198908	0.177856	0.199212	0.172836	0.300685	0.240898	0.309995	0.399923
Slr1398 protein	slr1398	P73190	P73190_SYNY3					250	3	3	3	12.4	28.331	0.00055127	2.9548	135840000	9	1	0.0109616	0.54879	0.446681	-0.655024	0.350467	0.661979	-0.418575	0.375479	0.597985	-0.594506	0.420395	0.461807	-0.555734		0.144397	0.0817484	0.114949	0.0944391	0.0206277	0.0941045	0.0449992	0.104864	0.101019		0.033252	0.0561169	0.0932774	0.0317506	0.0494081	0.0737516	0.0572014
Serine esterase	sll1284	P73192	P73192_SYNY3			hydrolase activity [GO:0016787]	hydrolase activity [GO:0016787]	204	3	3	3	24.5	22.209	0	66.848	221110000	55	1	-0.170693	0.839558	0.323307	-0.709644	0.318811	0.732626	-0.168415	1.19565	0.311472	-0.502393	3.49277	0.0252874	-0.601954	+	0.282556	0.331558	0.392257	0.31263	0.350243	0.209295	0.345952	0.348394	0.358537	0.246229	0.230044	0.373034	0.224529	0.0648264	0.275379	0.260583	0.237911
Sporulation protein SpoIID	spoIID	P73193	P73193_SYNY3	sporulation resulting in formation of a cellular spore [GO:0030435]	outer membrane-bounded periplasmic space [GO:0030288]		outer membrane-bounded periplasmic space [GO:0030288];sporulation resulting in formation of a cellular spore [GO:0030435]	391	5	5	5	15.9	42.134	0	19.636	341640000	44	1	0.959677	0.977528	0.25643	1.47918	1.42055	0.401957	1.90049	2.41035	0.574	2.49525	2.832	0.024	2.72051	+				0.0134498	0.0693494	0.0146425		0.0574159	0.0228937	0.2032	0.073806	0.0163857	0.0325403	0.152907	0.180603	0.054395	0.128621
Slr1699 protein	slr1699	P73194	P73194_SYNY3					282	3	3	3	12.4	31.919	0.00054765	2.8619	89359000	8	1	0.407988	0.577817	0.426743	0.679603	0.253552	0.707036	0.609689	0.0279787	0.962273	0.0635534	0.261204	0.621	-0.491634		0.0380782	0.0923742	0.0192096	0.061037		0.0724037	0.0966654	0.0770316		0.0314864	0.0717182	0.0996338	0.0640779	0.0369656	0.0380619	0.0874327	0.0755981
DNA ligase	lig	P73196	P73196_SYNY3			ligase activity [GO:0016874]	ligase activity [GO:0016874]	562	40	40	40	83.6	61.468	0	323.31	9417100000	745	1	-0.328513	1.0504	0.278867	-0.663024	0.98368	0.385919	-0.843055	2.19432	0.287568	-0.727533	1.79751	0.0442037	-1.06313	+	4.99128	4.09918	4.4638	3.33625	2.91224	4.34847	3.50483	2.90149	4.49024	1.43134	3.77528	3.47612	2.86011	2.07014	1.14742	3.40019	0.754187
Sll1582 protein	sll1582	P73197	P73197_SYNY3					1118	4	4	4	3.7	129.02	0	11.034	475280000	28	1	-0.106453	0.0855368	0.921081	-0.0523638	0.105077	0.896448	0.0823454	0.0907023	0.913299	0.0527669	1.13025	0.172891	-0.459554		0.0574683	0.0763956	0.061272	0.048165	0.0491259	0.0693244	0.0664514	0.0456005	0.0516206	0.0405873	0.065552	0.0823766	0.0430892	0.0559052	0.0408107	0.0579526	0.0717436
GumB protein	gumB	P73198	P73198_SYNY3		membrane [GO:0016020]	polysaccharide transmembrane transporter activity [GO:0015159]	membrane [GO:0016020];polysaccharide transmembrane transporter activity [GO:0015159]	504	12	12	12	39.7	54.125	0	190.69	957300000	253	1	-0.052833	0.0278297	0.972703	0.0152761	0.492895	0.631587	-0.228675	0.0798201	0.914774	0.0620469	0.436678	0.52884	-0.241774		0.429732	0.29405	0.407896	0.228795	0.245063	0.280507	0.479347	0.273724	0.258797	0.252643	0.316128	0.303082	0.30447	0.348209	0.299971	0.314214	0.210223
Slr1702 protein	slr1702	P73200	P73200_SYNY3					251	12	12	12	70.9	27.287	0	247.58	2561500000	264	1	0.012467	1.14204	0.41659	0.216056	0.689195	0.617154	0.164865	1.23659	0.378117	0.279587	1.37107	0.216344	0.279126		1.31404	0.9985	1.21283	1.04807	1.22292	1.16878	1.04713	1.0264	1.25448	1.35142	1.35791	1.31201	1.18638	1.60795	1.26891	1.58262	1.23687
Serine--tRNA ligase (EC 6.1.1.11) (Seryl-tRNA synthetase) (SerRS) (Seryl-tRNA(Ser/Sec) synthetase)	serS slr1703	P73201	SYS_SYNY3	selenocysteinyl-tRNA(Sec) biosynthetic process [GO:0097056];seryl-tRNA aminoacylation [GO:0006434]	cytoplasm [GO:0005737]	ATP binding [GO:0005524];serine-tRNA ligase activity [GO:0004828]	ATP binding [GO:0005524];cytoplasm [GO:0005737];selenocysteinyl-tRNA(Sec) biosynthetic process [GO:0097056];serine-tRNA ligase activity [GO:0004828];seryl-tRNA aminoacylation [GO:0006434]	430	18	18	18	49.1	48.037	0	301.27	5065700000	315	1	0.087747	1.16418	0.307436	0.393796	1.74039	0.397462	0.428305	0.875372	0.430218	0.315487	0.584376	0.471692	0.218386		1.04269	1.39304	0.956457	1.05127	1.57225	1.36009	1.25227	1.2524	1.06503	1.37	1.43285	1.47691	1.23377	2.09148	1.64626	1.73931	1.54028
Phycobilisome 8.9 kDa linker polypeptide, phycocyanin-associated, rod (L-8.9/R) (Rod-capping linker protein)	cpcD ssl3093	P73202	PYS1_SYNY3	photosynthesis [GO:0015979]	phycobilisome [GO:0030089]		photosynthesis [GO:0015979];phycobilisome [GO:0030089]	83	10	10	10	91.6	9.3222	0	323.31	34058000000	334	1	-0.392613	1.4905	0.215548	-0.911324	1.49225	0.407769	-0.676895	2.15954	0.303704	-0.861133	3.02503	0.0278	-1.54815	+	82.0943	71.2854	80.5533	59.9517	53.9117	67.6683	58.1393	60.1834	68.4696	24.1052	52.7713	49.9488	51.499	29.4159	16.2143	44.6169	30.1147
Phycobilisome 32.1 kDa linker polypeptide, phycocyanin-associated, rod 1	cpcC1 sll1580	P73203	PYR1_SYNY3	photosynthesis [GO:0015979]	phycobilisome [GO:0030089]		photosynthesis [GO:0015979];phycobilisome [GO:0030089]	291	37	37	37	80.1	32.52	0	323.31	405710000000	1376	1	-0.294933	1.14848	0.2556	-0.742364	1.62377	0.418393	-0.537375	1.56119	0.248947	-0.655913	2.32737	0.0257073	-1.39385	+	362.317	248.265	349.288	334.33	244.455	342.345	240.775	263.725	352.919	120.432	305.257	207.689	253.91	148.81	81.8093	245.575	168.254
Phycobilisome 32.1 kDa linker polypeptide, phycocyanin-associated, rod 2	cpcC2 sll1579	P73204	PYR2_SYNY3	photosynthesis [GO:0015979]	phycobilisome [GO:0030089]		photosynthesis [GO:0015979];phycobilisome [GO:0030089]	273	28	28	28	70.3	30.797	0	323.31	292220000000	1186	1	-0.435653	1.01096	0.266416	-0.956804	1.63883	0.399622	-0.713114	1.20522	0.26065	-0.988133	2.2524	0.0253538	-2.05997	+	350.412	195.745	258.151	267.062	180.034	239.62	217.044	238.26	261.722	57.9996	225.344	177.488	221.409	86.7701	40.2159	160.232	117.898
Putative dihydroflavonol 4-reductase (DFR) (EC 1.1.1.219) (Dihydrokaempferol 4-reductase)	dfrA slr1706	P73212	DFRA_SYNY3	flavonoid biosynthetic process [GO:0009813]		coenzyme binding [GO:0050662];dihydrokaempferol 4-reductase activity [GO:0045552]	coenzyme binding [GO:0050662];dihydrokaempferol 4-reductase activity [GO:0045552];flavonoid biosynthetic process [GO:0009813]	343	2	2	2	5.8	37.864	0	3.7901	135430000	17	1	0.317746	0.12794	0.854495	0.185415	0.488368	0.554473	0.536864	0.780667	0.369284	0.755986	0.487715	0.427799	0.496524		0.0347489	0.0564663	0.0641179		0.0716657	0.0535788	0.0230122	0.074516	0.0498795	0.0838568	0.0324145	0.0229952	0.0774695	0.0741518	0.0567354	0.0725298	0.0281308
Sll1571 protein	sll1571	P73216	P73216_SYNY3		integral component of membrane [GO:0016021]		integral component of membrane [GO:0016021]	313	5	5	5	18.5	34.534	0	9.0856	622660000	41	1	0.435287	0.546452	0.428028	0.871516	0.350258	0.633793	0.678705	0.341177	0.624098	0.613707	0.029851	0.949238	-0.0669342		1.1225	1.11515	0.0672777	0.373979	0.43825	0.82234	1.0386	0.945463	0.244667	0.315797	0.819481	1.03045	0.793813	0.814805	0.518061	0.777987	0.916111
Sll1570 protein	sll1570	P73217	P73217_SYNY3					243	3	3	3	24.7	26.62	0	13.998	113840000	7	1	0.471827	0.0895763	0.903185	-0.147364	0.985669	0.41261	-0.539035	0.00353403	0.995086	-0.00447316	0.709641	0.252704	0.757446		0.0811598	0.0959572	0.0743755	0.0566386	0.0489627	0.0617339	0.0670343	0.149239	0.0556834	0.239645	0.0742422	0.0434373	0.0423549	0.0261205	0.270161	0.0449267	0.0376291
Fibrillin	sll1568	P73219	P73219_SYNY3					202	10	10	10	53	22.728	0	49.47	977880000	99	1	-0.261713	0.109015	0.89161	-0.107844	0.00745247	0.988688	-0.00691469	0.134428	0.860675	-0.105313	0.553583	0.43209	-0.328094		0.412942	0.796659	0.535691	0.47838	0.365192	0.780845	0.703022	0.518528	0.161476	0.27042	0.691923	0.778397	0.359377	0.465749	0.23501	0.543487	0.680937
ABC transporter	sll1927	P73220	P73220_SYNY3	peptide transport [GO:0015833]		ATP binding [GO:0005524];ATPase activity [GO:0016887]	ATP binding [GO:0005524];ATPase activity [GO:0016887];peptide transport [GO:0015833]	650	11	11	11	28.6	72.878	0	63.885	984470000	125	1	-0.202373	0.290435	0.748657	-0.135224	0.209505	0.801754	-0.154915	0.323446	0.729886	-0.162293	0.588132	0.456106	-0.243074		0.275325	0.320131	0.268514	0.211061	0.159832	0.269211	0.220973	0.144415	0.248289	0.185613	0.232304	0.267253	0.189094	0.217717	0.195494	0.213694	0.200656
Slr2005 protein	slr2005	P73222	P73222_SYNY3		outer membrane-bounded periplasmic space [GO:0030288]		outer membrane-bounded periplasmic space [GO:0030288]	261	7	7	7	42.1	27.975	0	107.45	2344000000	144	1	-0.185593	1.68145	0.277576	-0.323464	1.31484	0.418387	-0.314335	0.794073	0.5413	-0.189233	0.686688	0.450258	-0.206674		1.42613	0.975176	1.4415	1.28773	1.15087	1.11034	1.03186	1.14021	1.41205	0.846552	0.961249	0.94624	1.10441	0.972201	0.991574	1.00648	0.876055
Slr2018 protein	slr2018	P73238	P73238_SYNY3		integral component of membrane [GO:0016021]		integral component of membrane [GO:0016021]	799	7	7	7	16.4	84.853	0	58.706	475050000	82	1	-0.387033	1.14018	0.245705	-0.977024	0.733479	0.431006	-0.806395	0.942316	0.316601	-0.934993	1.69017	0.0440909	-1.30469	+	0.415468	0.310106	0.293854	0.330318	0.0802935	0.202277	0.250441	0.231277	0.204191	0.109756	0.164525	0.163797	0.131412	0.072661	0.132053	0.141259	0.130037
ABC transporter	slr2019	P73239	P73239_SYNY3		integral component of membrane [GO:0016021]	ATP binding [GO:0005524];lipid-transporting ATPase activity [GO:0034040]	ATP binding [GO:0005524];integral component of membrane [GO:0016021];lipid-transporting ATPase activity [GO:0034040]	593	9	9	9	23.6	65.761	0	109.06	375640000	91	1	-0.0833729	0.399432	0.60855	0.308656	0.491189	0.603726	0.286865	0.824199	0.372509	0.594087	2.00835	0.0412747	0.921766	+	0.12	0.0519884	0.0898381	0.0532538	0.0809473	0.121279	0.0582032	0.0277051	0.0556179	0.166382	0.0776582	0.0586827	0.0799295	0.118727	0.162825	0.108624	0.0661046
Sll1921 protein	sll1921	P73240	P73240_SYNY3					251	3	3	2	17.1	28.295	0	12.752	253530000	28	1	0.109287	0.300968	0.679689	0.287756	0.095475	0.896678	0.110145	0.208039	0.766628	-0.308493	0.0677082	0.896105	0.0862658		0.292845	0.109685	0.122969	0.119033	0.0651734	0.173392	0.250215	0.167414	0.0657617	0.0936921	0.128397	0.0941418	0.204047	0.197555	0.170482	0.171231	0.206712
Probable copper-transporting ATPase PacS (EC 3.6.3.54)	pacS sll1920	P73241	ATCS_SYNY3	copper ion import [GO:0015677]	integral component of membrane [GO:0016021];plasma membrane [GO:0005886]	ATP binding [GO:0005524];cation-transporting ATPase activity [GO:0019829];copper ion binding [GO:0005507]	ATP binding [GO:0005524];cation-transporting ATPase activity [GO:0019829];copper ion binding [GO:0005507];copper ion import [GO:0015677];integral component of membrane [GO:0016021];plasma membrane [GO:0005886]	745	5	5	5	8.3	79.949	0	38.227	201790000	57	1	-0.147593	0.0531425	0.950954	-0.0329839	0.311181	0.753322	-0.134995	0.846285	0.435033	-0.324773	1.57618	0.0765731	-0.696594		0.0739354	0.0775104	0.0698339	0.0629098	0.0723746	0.064164	0.113963	0.0918608	0.0350314	0.046429	0.0814175	0.0850514	0.0738157	0.0823051	0.0386334	0.0652769	0.100002
Malonyl CoA-acyl carrier protein transacylase (MCT) (EC 2.3.1.39)	fabD slr2023	P73242	FABD_SYNY3	fatty acid biosynthetic process [GO:0006633]		[acyl-carrier-protein] S-malonyltransferase activity [GO:0004314]	[acyl-carrier-protein] S-malonyltransferase activity [GO:0004314];fatty acid biosynthetic process [GO:0006633]	293	6	6	6	18.1	31.49	0	23.524	1156800000	55	1	0.073047	0.515635	0.510985	0.407876	0.370125	0.651075	0.395525	0.66685	0.434557	0.547447	1.30345	0.0988451	0.789386		0.465389	0.447833	0.531217	0.745163	1.39796	0.598576	0.404144	0.760908	0.820339	0.983823	0.973588	0.603229	0.887225	1.37872	0.659934	1.12859	0.825416
CheY subfamily	slr2024	P73243	P73243_SYNY3	phosphorelay signal transduction system [GO:0000160]	intracellular [GO:0005622]		intracellular [GO:0005622];phosphorelay signal transduction system [GO:0000160]	180	11	11	11	67.2	20.233	0	76.225	4233900000	138	1	0.169527	0.167632	0.847825	0.0920962	0.0783618	0.916743	0.0608854	0.0540884	0.947893	-0.0360931	0.0655019	0.931666	0.0252258		1.98923	2.54089	2.67173	2.72797	3.44959	3.55662	3.03531	3.75833	2.62768	2.14499	3.56569	1.97504	3.58723	3.03464	2.28088	1.71703	3.04363
Slr2025 protein	slr2025	P73244	P73244_SYNY3					153	4	4	4	39.9	16.888	0	160.38	2021200000	31	1	-0.360633	1.12858	0.257877	-0.784524	1.15305	0.398258	-0.689175	0.680707	0.435864	-0.494273	1.20939	0.122498	-0.675074		7.95747	3.82361	7.63364	6.09248	3.00221	4.40489	3.86574	4.28737	6.33257	2.63312	4.41399	2.90831	4.6482	2.7363	1.71581	3.50938	3.64974
Dihydropteroate synthase (DHPS) (EC 2.5.1.15) (Dihydropteroate pyrophosphorylase)	folP slr2026	P73248	DHPS_SYNY3	folic acid biosynthetic process [GO:0046656];tetrahydrofolate biosynthetic process [GO:0046654]	cytosol [GO:0005829]	dihydropteroate synthase activity [GO:0004156];metal ion binding [GO:0046872]	cytosol [GO:0005829];dihydropteroate synthase activity [GO:0004156];folic acid biosynthetic process [GO:0046656];metal ion binding [GO:0046872];tetrahydrofolate biosynthetic process [GO:0046654]	289	4	4	4	17	31.602	0.00054915	2.8808	104150000	43	1	-0.450293	1.59044	0.210817	-0.831804	1.39634	0.390795	-1.18677	1.38664	0.260889	-0.753893	0.209332	0.751334	-0.130514		0.107567	0.0474593	0.071094	0.0590601	0.0423271	0.0363175	0.0388415	0.0494253	0.0749406	0.0364679	0.0267463	0.0478074	0.0258082	0.0330233	0.0466038	0.0247903	0.0194255
Sll1913 protein	sll1913	P73250	P73250_SYNY3			oxidoreductase activity [GO:0016491]	oxidoreductase activity [GO:0016491]	599	6	6	6	14.7	66.599	0	15.678	275950000	31	1	0.149487	0.263928	0.70543	0.313116	0.488856	0.553044	0.548425	0.117303	0.855064	0.210027	0.082126	0.870303	0.126566		0.117311	0.0487597	0.121993	0.0412869	0.0244153	0.080493	0.0845145	0.153456	0.0421651	0.0268278	0.0621106	0.0511713	0.109104	0.0958303	0.0626558	0.0788206	0.0717287
Sll1911 protein	sll1911	P73253	P73253_SYNY3					128	8	8	8	67.2	14.126	0	139.37	1296600000	77	1	-0.205133	0.352203	0.616621	0.420836	0.179646	0.799514	-0.296475	0.330562	0.64	0.497487	1.11044	0.106034	1.19669		0.99786	0.9745	0.292513	0.399489	0.78765	0.597333	0.583071	0.258152	0.3107	1.57371	0.874532	0.531182	0.396357	1.30625	1.60002	1.26061	0.134632
Argininosuccinate lyase (ASAL) (EC 4.3.2.1) (Arginosuccinase)	argH slr1133	P73257	ARLY_SYNY3	arginine biosynthetic process via ornithine [GO:0042450]	cytoplasm [GO:0005737]	argininosuccinate lyase activity [GO:0004056]	arginine biosynthetic process via ornithine [GO:0042450];argininosuccinate lyase activity [GO:0004056];cytoplasm [GO:0005737]	461	20	20	20	50.5	50.947	0	323.31	6423700000	370	1	-0.021293	0.49546	0.70691	-0.102304	0.451335	0.766274	-0.0837347	0.357475	0.792938	-0.0776131	0.77109	0.446667	-0.185534		2.33255	2.43451	2.67043	2.84559	2.2292	2.38619	2.56426	2.43698	2.90229	2.06461	2.64796	2.48127	2.34254	2.2161	1.97834	2.52209	2.16925
Sll1084 protein	sll1084	P73260	P73260_SYNY3			catalytic activity [GO:0003824];iron-sulfur cluster binding [GO:0051536]	catalytic activity [GO:0003824];iron-sulfur cluster binding [GO:0051536]	865	8	8	8	12.8	97.388	0	37.543	651290000	85	1	0.028687	0.21305	0.817617	0.0885161	0.0369875	0.954732	-0.0341746	0.0671725	0.940142	0.0384869	0.110075	0.867356	0.0603058		0.182695	0.102588	0.17376	0.125576	0.155958	0.171361	0.142491	0.150945	0.127865	0.149485	0.1715	0.140426	0.165623	0.137502	0.158043	0.214406	0.185359
Thioredoxin-like protein slr1139	slr1139	P73263	THIO2_SYNY3	cell redox homeostasis [GO:0045454];cellular response to oxidative stress [GO:0034599];glycerol ether metabolic process [GO:0006662]	cytosol [GO:0005829]	oxidoreductase activity, acting on a sulfur group of donors, disulfide as acceptor [GO:0016671];protein disulfide oxidoreductase activity [GO:0015035];protein-disulfide reductase activity [GO:0047134];thioredoxin-disulfide reductase activity [GO:0004791]	cell redox homeostasis [GO:0045454];cellular response to oxidative stress [GO:0034599];cytosol [GO:0005829];glycerol ether metabolic process [GO:0006662];oxidoreductase activity, acting on a sulfur group of donors, disulfide as acceptor [GO:0016671];protein disulfide oxidoreductase activity [GO:0015035];protein-disulfide reductase activity [GO:0047134];thioredoxin-disulfide reductase activity [GO…	109	6	6	6	44	12.171	0	74.991	2028700000	82	1	0.108867	0.038894	0.96437	0.0203161	0.120658	0.894253	0.0644853	0.0989647	0.911846	0.0490669	0.296667	0.703044	-0.125134		2.22593	2.05186	2.62364	2.29124	2.731	3.20185	3.19462	2.77078	1.87877	2.05362	2.10918	3.13221	2.87562	2.56761	1.64934	3.2021	3.49307
3-amino-5-hydroxybenzoic acid synthase	slr1140	P73264	P73264_SYNY3			catalytic activity [GO:0003824]	catalytic activity [GO:0003824]	378	19	19	19	70.9	41.559	0	323.31	6891300000	297	1	0.029447	0.270156	0.799253	0.0814562	0.847356	0.581634	0.163885	0.646382	0.608539	0.159167	0.764343	0.507115	0.141086		2.68312	2.01955	2.11928	2.17789	2.5139	2.58293	2.32679	2.37939	1.9507	2.49609	1.90512	2.34922	2.70358	2.83103	2.43411	3.00573	2.53027
Sll1080 protein	sll1080	P73267	P73267_SYNY3		membrane [GO:0016020]	ATPase activity, coupled to transmembrane movement of substances [GO:0042626];transporter activity [GO:0005215]	ATPase activity, coupled to transmembrane movement of substances [GO:0042626];membrane [GO:0016020];transporter activity [GO:0005215]	352	8	8	8	26.1	38.209	0	42.716	1001400000	82	1	-0.598633	1.23025	0.250232	-0.790744	1.66511	0.4094	-0.780315	1.31109	0.259216	-0.733433	1.61647	0.0652966	-0.855534		1.32916	0.869787	1.26617	0.989333	0.550887	0.809839	0.468572	0.57734	1.20747	0.378764	0.997219	0.573346	0.677913	0.362971	0.365969	0.668416	0.399369
Probable agmatinase 2 (EC 3.5.3.11) (Agmatine ureohydrolase 2) (AUH 2)	speB2 sll1077	P73270	SPEB2_SYNY3	putrescine biosynthetic process [GO:0009446]		agmatinase activity [GO:0008783];metal ion binding [GO:0046872]	agmatinase activity [GO:0008783];metal ion binding [GO:0046872];putrescine biosynthetic process [GO:0009446]	390	6	6	6	17.9	42.963	0	10.823	734560000	43	1	0.119887	0.736047	0.408282	0.425696	1.2787	0.382574	0.468525	0.18341	0.811916	0.141627	0.0578722	0.928419	0.0363657		0.247124	0.221539	0.186103	0.14975	0.302882	0.362011	0.208836	0.188116	0.216043	0.227884	0.43918	0.357441	0.200597	0.331373	0.193646	0.355499	0.244481
Slr1143 protein	slr1143	P73272	P73272_SYNY3					343	6	6	6	21	38.761	0	10.994	396760000	82	1	-0.176313	1.51247	0.265712	-0.388244	0.686364	0.536171	-0.280155	0.418381	0.677176	-0.163273	1.62112	0.106069	-0.459834		0.220524	0.156598	0.197137	0.170085	0.126502	0.196951	0.215976	0.138398	0.108645	0.124306	0.13857	0.142682	0.115093	0.127992	0.13096	0.142419	0.157213
Leucine--tRNA ligase (EC 6.1.1.4) (Leucyl-tRNA synthetase) (LeuRS)	leuS sll1074	P73274	SYL_SYNY3	leucyl-tRNA aminoacylation [GO:0006429]	cytosol [GO:0005829]	aminoacyl-tRNA editing activity [GO:0002161];ATP binding [GO:0005524];leucine-tRNA ligase activity [GO:0004823]	aminoacyl-tRNA editing activity [GO:0002161];ATP binding [GO:0005524];cytosol [GO:0005829];leucine-tRNA ligase activity [GO:0004823];leucyl-tRNA aminoacylation [GO:0006429]	869	32	32	32	48.3	98.294	0	323.31	10531000000	476	1	0.113807	0.266093	0.848044	0.0541361	0.698379	0.664066	0.126785	0.693711	0.579448	0.177087	1.16094	0.297167	0.229326		1.88127	1.75362	1.75439	1.50925	1.7111	2.01127	1.75984	1.5253	1.96781	2.0872	1.98135	1.68492	1.56631	1.73607	1.98631	2.09437	1.83235
ABC transporter	slr1149	P73278	P73278_SYNY3		integral component of membrane [GO:0016021]	ATP binding [GO:0005524];lipid-transporting ATPase activity [GO:0034040]	ATP binding [GO:0005524];integral component of membrane [GO:0016021];lipid-transporting ATPase activity [GO:0034040]	601	3	3	3	7.3	67.374	0	6.4131	138360000	28	1	-0.221534	0.0820001	0.920138	-0.0605238	0.0107962	0.986588	-0.00648212	0.151916	0.828215	-0.155853	0.16006	0.765686	-0.202054		0.035902	0.0394026	0.0267628	0.0309724	0.0469584		0.0373938	0.0294946	0.0266909	0.0518422	0.0211468	0.057471	0.0329923	0.0313504	0.0355155		0.0437157
Slr1150 protein	slr1150	P73279	P73279_SYNY3					170	2	2	2	10.6	18.995	0	6.7139	205590000	27	1	1.05532	0.457972	0.481282	1.08931	0.461131	0.537738	1.0947	0.564527	0.434491	1.25338	0.121671	0.798893	0.346277		0.340685	0.542929		0.138843	0.497348	0.309177	0.808681	0.549653	0.138398	0.295877	0.434908	0.559565	0.148319	0.515493	0.340256	0.408163	0.48377
Sll1071 protein	sll1071	P73281	P73281_SYNY3		integral component of membrane [GO:0016021]		integral component of membrane [GO:0016021]	275	9	9	9	35.3	30.532	0	40.578	1272800000	132	1	-0.072873	0.0742127	0.927069	-0.0509838	0.257342	0.751589	-0.203615	1.2164	0.259983	-0.802993	0.635361	0.371488	-0.376234		0.853468	1.45421	0.92792	0.706925	0.573286	1.12889	1.00608	1.02108	0.491851	0.635635	0.813031	1.07749	0.677537	0.827956	0.795919	0.588705	0.77792
Transketolase (EC 2.2.1.1)	tktA	P73282	P73282_SYNY3	metabolic process [GO:0008152]		metal ion binding [GO:0046872];transketolase activity [GO:0004802]	metabolic process [GO:0008152];metal ion binding [GO:0046872];transketolase activity [GO:0004802]	670	43	43	43	66.4	71.724	0	323.31	171340000000	1430	1	0.133487	1.42241	0.37657	0.214496	0.710849	0.566649	0.208165	1.51616	0.34099	0.298007	2.37236	0.100579	0.321466		47.0822	44.3276	45.8634	45.1555	58.9176	55.6306	47.8631	47.3533	54.3419	59.0298	56.4493	50.8219	54.2545	60.7464	56.6417	61.8164	59.9212
3-oxoacyl-[acyl-carrier-protein] synthase 2 (EC 2.3.1.179) (3-oxoacyl-[acyl-carrier-protein] synthase II) (Beta-ketoacyl-ACP synthase II) (KAS II)	fabF sll1069	P73283	FABF_SYNY3	fatty acid biosynthetic process [GO:0006633]		beta-ketoacyl-acyl-carrier-protein synthase II activity [GO:0033817]	beta-ketoacyl-acyl-carrier-protein synthase II activity [GO:0033817];fatty acid biosynthetic process [GO:0006633]	416	18	18	18	57.7	44.004	0	323.31	6407400000	467	1	0.317547	0.794522	0.419533	0.321476	0.526472	0.5868	0.281705	0.814964	0.439063	0.324647	0.814572	0.325523	0.306866		1.24075	2.00936	1.61292	2.13041	2.68073	2.47016	2.39254	2.13612	2.32172	2.35507	2.25962	2.25664	2.38679	2.88691	1.99155	2.63357	2.85085
Bacterioferritin (EC 1.16.3.1)	bfr	P73287	P73287_SYNY3	cellular iron ion homeostasis [GO:0006879];iron ion transport [GO:0006826]	cell [GO:0005623]	ferric iron binding [GO:0008199];ferroxidase activity [GO:0004322]	cell [GO:0005623];cellular iron ion homeostasis [GO:0006879];ferric iron binding [GO:0008199];ferroxidase activity [GO:0004322];iron ion transport [GO:0006826]	176	7	7	7	53.4	20.226	0	100.87	4103900000	176	1	-0.037033	0.0405511	0.962163	-0.0267438	0.368697	0.705604	0.171825	0.405221	0.674022	-0.175333	1.46187	0.117471	-0.484774		4.7661	3.83422	3.88273	2.58082	3.07083	3.96881	3.85717	4.19972	3.51224	2.19036	4.93819	4.05128	2.95257	3.51842	2.46621	4.29905	3.59675
Aklaviketone reductase	sll1825	P73288	P73288_SYNY3					210	6	6	6	41.9	21.976	0	24.572	1484800000	59	1	-0.578433	1.53906	0.200522	-1.19008	0.835141	0.412547	-0.941155	1.44287	0.252923	-1.11905	2.02026	0.0344526	-1.27127	+	3.01741	2.43468	2.47387	2.45756	0.816728	1.2404	1.45462	1.68669	2.26827	0.711813	0.908012	1.2764	1.45173	0.458383	0.764873	0.701598	0.871573
50S ribosomal protein L25	rplY sll1824	P73289	RL25_SYNY3	translation [GO:0006412]	cytosolic large ribosomal subunit [GO:0022625]	5S rRNA binding [GO:0008097];structural constituent of ribosome [GO:0003735]	5S rRNA binding [GO:0008097];cytosolic large ribosomal subunit [GO:0022625];structural constituent of ribosome [GO:0003735];translation [GO:0006412]	98	6	6	6	46.9	11.141	0	295.22	12324000000	116	1	0.197907	0.699461	0.451287	0.311136	0.894862	0.452389	0.361525	0.9325	0.376851	0.411167	1.26118	0.14456	0.484046		9.07193	9.9475	10.5398	10.841	19.6687	12.1797	11.166	13.1154	13.9945	16.1322	12.1694	12.0861	15.1871	17.2907	15.4367	14.8184	14.9378
Adenylosuccinate synthetase (AMPSase) (AdSS) (EC 6.3.4.4) (IMP--aspartate ligase)	purA sll1823	P73290	PURA_SYNY3	'de novo' AMP biosynthetic process [GO:0044208];IMP metabolic process [GO:0046040]	cytoplasm [GO:0005737]	adenylosuccinate synthase activity [GO:0004019];GTP binding [GO:0005525];metal ion binding [GO:0046872]	adenylosuccinate synthase activity [GO:0004019];cytoplasm [GO:0005737];'de novo' AMP biosynthetic process [GO:0044208];GTP binding [GO:0005525];IMP metabolic process [GO:0046040];metal ion binding [GO:0046872]	444	29	29	29	71.8	48.792	0	323.31	13565000000	630	1	0.334647	1.31544	0.253355	0.603016	1.29919	0.394832	0.585765	1.35312	0.255907	0.655347	1.70875	0.0679738	0.706726		2.54049	2.1935	1.67339	2.34279	4.45284	2.79027	2.71686	3.38274	2.7211	4.44619	3.24897	3.55556	3.28746	4.95136	4.18229	4.29696	4.09935
	rpmE rpl31 ssl3445	P73292	RL31_SYNY3	translation [GO:0006412]	ribosome [GO:0005840]	rRNA binding [GO:0019843];structural constituent of ribosome [GO:0003735]	ribosome [GO:0005840];rRNA binding [GO:0019843];structural constituent of ribosome [GO:0003735];translation [GO:0006412]	81	2	2	2	27.2	9.3036	0	25.714	2253900000	17	1	-0.075893	0.0875907	0.917572	-0.0745238	0.297262	0.749849	-0.150295	0.195149	0.808147	0.145067	0.823461	0.249131	0.495566		2.66735	2.95557	3.76897	4.63391	4.83537	2.79744	2.98275	2.96369	3.73004	5.5484	2.40841	3.48312	5.94127	4.48381	2.30105	3.37156	4.37564
30S ribosomal protein S9	rpsI rps9 sll1822	P73293	RS9_SYNY3	maturation of SSU-rRNA from tricistronic rRNA transcript (SSU-rRNA, 5.8S rRNA, LSU-rRNA) [GO:0000462];translation [GO:0006412]	cytosolic small ribosomal subunit [GO:0022627]	RNA binding [GO:0003723];structural constituent of ribosome [GO:0003735]	cytosolic small ribosomal subunit [GO:0022627];maturation of SSU-rRNA from tricistronic rRNA transcript (SSU-rRNA, 5.8S rRNA, LSU-rRNA) [GO:0000462];RNA binding [GO:0003723];structural constituent of ribosome [GO:0003735];translation [GO:0006412]	137	15	15	15	75.9	15.086	0	323.31	29137000000	296	1	0.251787	1.55077	0.248734	0.477916	1.61787	0.399007	0.480025	1.45687	0.272848	0.460707	1.84508	0.0947295	0.440146		19.6371	21.9909	21.2733	19.0066	32.2522	26.2803	22.2856	26.1365	26.1745	33.6369	30.0123	26.6429	27.0615	41.1045	33.1766	33.8883	34.5615
50S ribosomal protein L13	rplM rpl13 sll1821	P73294	RL13_SYNY3	translation [GO:0006412]	ribosome [GO:0005840]	mRNA binding [GO:0003729];structural constituent of ribosome [GO:0003735]	mRNA binding [GO:0003729];ribosome [GO:0005840];structural constituent of ribosome [GO:0003735];translation [GO:0006412]	151	12	12	12	62.9	16.99	0	123.12	27483000000	157	1	0.169767	1.53549	0.302522	0.297716	0.726235	0.522996	0.294485	0.961673	0.394982	0.340287	1.0777	0.245138	0.316306		26.4576	24.497	24.0251	25.7934	34.7039	31.0971	26.416	25.5667	29.348	40.7286	32.8651	30.558	29.9373	37.0327	35.1291	41.6637	36.9472
50S ribosomal protein L17	rplQ rpl17 sll1819	P73296	RL17_SYNY3	translation [GO:0006412]	cytosolic large ribosomal subunit [GO:0022625]	structural constituent of ribosome [GO:0003735]	cytosolic large ribosomal subunit [GO:0022625];structural constituent of ribosome [GO:0003735];translation [GO:0006412]	116	9	9	9	58.6	13.228	0	168.63	22957000000	206	1	0.0865471	0.359853	0.700004	0.154956	0.173669	0.839873	0.117966	1.34401	0.298573	0.450827	1.66543	0.102483	0.461546		31.3308	19.8674	29.7367	24.38	34.8413	29.489	21.9986	21.9461	35.9368	41.4808	32.7968	21.8715	32.6989	35.0545	32.7175	44.4902	24.947
DNA-directed RNA polymerase subunit alpha (RNAP subunit alpha) (EC 2.7.7.6) (RNA polymerase subunit alpha) (Transcriptase subunit alpha)	rpoA sll1818	P73297	RPOA_SYNY3	DNA-templated transcription, elongation [GO:0006354]	cytoplasm [GO:0005737]	DNA binding [GO:0003677];DNA-directed 5'-3' RNA polymerase activity [GO:0003899];protein dimerization activity [GO:0046983]	cytoplasm [GO:0005737];DNA binding [GO:0003677];DNA-directed 5'-3' RNA polymerase activity [GO:0003899];DNA-templated transcription, elongation [GO:0006354];protein dimerization activity [GO:0046983]	314	29	29	29	81.8	35.003	0	323.31	51901000000	810	1	0.266127	2.26856	0.196731	0.485956	1.09291	0.417984	0.406445	1.85807	0.256222	0.531087	2.52135	0.0419898	0.575726	+	17.6869	15.9528	15.5568	15.4382	21.5412	24.5629	17.5384	16.5871	19.2768	26.6538	24.8622	21.2219	20.8398	29.5877	24.1758	29.3302	24.253
30S ribosomal protein S11	rpsK rps11 sll1817	P73298	RS11_SYNY3	maturation of SSU-rRNA from tricistronic rRNA transcript (SSU-rRNA, 5.8S rRNA, LSU-rRNA) [GO:0000462];ribosomal small subunit assembly [GO:0000028];translation [GO:0006412]	cytosolic small ribosomal subunit [GO:0022627]	mRNA 5'-UTR binding [GO:0048027];small ribosomal subunit rRNA binding [GO:0070181];structural constituent of ribosome [GO:0003735]	cytosolic small ribosomal subunit [GO:0022627];maturation of SSU-rRNA from tricistronic rRNA transcript (SSU-rRNA, 5.8S rRNA, LSU-rRNA) [GO:0000462];mRNA 5'-UTR binding [GO:0048027];ribosomal small subunit assembly [GO:0000028];small ribosomal subunit rRNA binding [GO:0070181];structural constituent of ribosome [GO:0003735];translation [GO:0006412]	130	10	10	10	67.7	13.762	0	323.31	20391000000	286	1	0.149107	1.62354	0.250808	0.429416	1.08065	0.421446	0.372425	1.32918	0.306418	0.438267	2.28296	0.0495537	0.562406	+	16.376	12.8744	15.4568	13.991	21.7241	17.9587	14.2357	16.6586	15.201	25.6515	20.7161	19.3986	18.3419	24.5734	24.2211	23.551	21.5034
30S ribosomal protein S13	rpsM rps13 sll1816	P73299	RS13_SYNY3	ribosome biogenesis [GO:0042254];translation [GO:0006412]	cytosol [GO:0005829];small ribosomal subunit [GO:0015935]	rRNA binding [GO:0019843];structural constituent of ribosome [GO:0003735];tRNA binding [GO:0000049]	cytosol [GO:0005829];ribosome biogenesis [GO:0042254];rRNA binding [GO:0019843];small ribosomal subunit [GO:0015935];structural constituent of ribosome [GO:0003735];translation [GO:0006412];tRNA binding [GO:0000049]	127	18	18	18	77.2	14.572	0	323.31	32962000000	502	1	0.099207	0.432241	0.639163	0.186976	0.206306	0.822929	0.114045	0.669255	0.50903	0.276607	0.800774	0.337886	0.297106		32.1737	20.0126	33.7747	25.2766	36.4141	31.5006	23.3758	28.0765	32.3589	42.1971	37.1962	29.7801	25.2336	34.938	39.184	29.3302	32.0487
50S ribosomal protein L36	rpmJ rpl36 sml0006	P73300	RL36_SYNY3	translation [GO:0006412]	ribosome [GO:0005840]	structural constituent of ribosome [GO:0003735]	ribosome [GO:0005840];structural constituent of ribosome [GO:0003735];translation [GO:0006412]	38	2	2	2	31.6	4.4555	0.0026525	2.187	205030000	2	1	1.64723	0.0120694	0.983816	-0.0909176	0.163631	0.795931	0.984218	0.636634	0.379392	2.26471	0.0287921	0.948317	0.208079		4.14827	0.439043			1.59652	1.54211	0.700396		1.03089	6.1461	3.1777	0.936518			2.00443	1.39148	0.699499
Translation initiation factor IF-1	infA ssl3441	P73301	IF1_SYNY3		cytosol [GO:0005829]	ribosome binding [GO:0043022];rRNA binding [GO:0019843];translation initiation factor activity [GO:0003743]	cytosol [GO:0005829];ribosome binding [GO:0043022];rRNA binding [GO:0019843];translation initiation factor activity [GO:0003743]	75	2	2	2	34.7	8.6811	0	13.012	160900000	32	1	0.738207	0.00911914	0.992128	-0.0163639	0.564231	0.469065	-1.47538	0.0303799	0.960416	-0.0679731	0.101128	0.830391	-0.304328		0.679672	0.287341	0.526634	0.128633	0.237521	0.937576	0.722937	0.306571	0.64577	0.302451	0.943427	0.314074	0.175564	0.186924	0.305341	0.23503	0.37467
Adenylate kinase 1 (AK 1) (EC 2.7.4.3) (ATP-AMP transphosphorylase 1) (ATP:AMP phosphotransferase 1) (Adenylate monophosphate kinase 1)	adk1 sll1815	P73302	KAD1_SYNY3	AMP salvage [GO:0044209]	cytoplasm [GO:0005737]	adenylate kinase activity [GO:0004017];ATP binding [GO:0005524]	adenylate kinase activity [GO:0004017];AMP salvage [GO:0044209];ATP binding [GO:0005524];cytoplasm [GO:0005737]	185	13	13	13	91.4	20.251	0	323.31	6551600000	243	1	0.052167	0.294296	0.775135	-0.0950238	0.460967	0.696722	-0.138575	0.137275	0.894207	-0.0475931	1.25221	0.380528	-0.164374		4.33704	5.17455	4.70362	3.88127	4.43252	4.12847	4.78707	5.23247	4.77199	4.40937	4.69844	5.00642	3.10087	4.20389	4.26071	3.60455	3.92256
50S ribosomal protein L15	rplO rpl15 sll1813	P73303	RL15_SYNY3	translation [GO:0006412]	cytosolic large ribosomal subunit [GO:0022625]	rRNA binding [GO:0019843];structural constituent of ribosome [GO:0003735]	cytosolic large ribosomal subunit [GO:0022625];rRNA binding [GO:0019843];structural constituent of ribosome [GO:0003735];translation [GO:0006412]	147	10	10	10	83.7	15.194	0	323.31	23955000000	199	1	0.141907	0.509464	0.597318	0.202696	0.808032	0.504793	0.285565	0.984199	0.384981	0.356187	1.55487	0.0990494	0.535646		18.6915	11.4417	21.4242	16.6255	21.607	17.7016	14.6228	17.6536	23.2505	25.3334	19.6326	16.9813	23.0496	19.2279	22.4881	22.3224	20.2717
30S ribosomal protein S5	rpsE rps5 sll1812	P73304	RS5_SYNY3	translation [GO:0006412]	small ribosomal subunit [GO:0015935]	rRNA binding [GO:0019843];structural constituent of ribosome [GO:0003735]	rRNA binding [GO:0019843];small ribosomal subunit [GO:0015935];structural constituent of ribosome [GO:0003735];translation [GO:0006412]	173	21	21	21	79.8	18.241	0	323.31	96415000000	597	1	0.199327	0.986267	0.360095	0.354596	0.579629	0.566331	0.280165	0.863092	0.393641	0.423487	1.57542	0.0989761	0.528806		53.5721	36.1578	49.6139	39.6522	73.5283	60.775	45.1778	41.7815	61.7853	78.8791	65.1947	52.4867	60.6095	68.4333	67.4709	74.6007	67.6489
50S ribosomal protein L18	rplR rpl18 sll1811	P73305	RL18_SYNY3	translation [GO:0006412]	cytosolic large ribosomal subunit [GO:0022625]	5S rRNA binding [GO:0008097];structural constituent of ribosome [GO:0003735]	5S rRNA binding [GO:0008097];cytosolic large ribosomal subunit [GO:0022625];structural constituent of ribosome [GO:0003735];translation [GO:0006412]	120	10	10	10	76.7	13.204	0	323.31	11854000000	173	1	0.197627	0.0195464	0.978088	0.0168961	0.6204	0.584953	-0.214795	0.289762	0.749832	0.148247	1.06867	0.24919	0.312406		13.5368	16.0815	16.9707	15.4221	16.0625	27.0584	17.6983	10.7472	19.0351	18.5297	30.9289	9.38319	16.9718	11.7829	16.7199	13.0205	13.6752
50S ribosomal protein L6	rplF rpl6 sll1810	P73306	RL6_SYNY3	cytoplasmic translation [GO:0002181]	cytosolic large ribosomal subunit [GO:0022625]	RNA binding [GO:0003723];rRNA binding [GO:0019843];structural constituent of ribosome [GO:0003735]	cytoplasmic translation [GO:0002181];cytosolic large ribosomal subunit [GO:0022625];RNA binding [GO:0003723];rRNA binding [GO:0019843];structural constituent of ribosome [GO:0003735]	179	16	16	16	75.4	19.666	0	323.31	59700000000	639	1	0.298227	1.75418	0.245381	0.446936	1.20483	0.388067	0.452985	1.64168	0.262723	0.489967	2.76543	0.0390983	0.546906	+	26.4374	27.0515	29.0743	24.8975	38.4931	39.5089	32.2168	28.0668	34.3703	45.6224	37.8936	37.4444	33.2428	50.9859	38.9997	52.3137	37.0549
30S ribosomal protein S8	rpsH rps8 sll1809	P73307	RS8_SYNY3	translation [GO:0006412]	cytosolic small ribosomal subunit [GO:0022627]	rRNA binding [GO:0019843];structural constituent of ribosome [GO:0003735]	cytosolic small ribosomal subunit [GO:0022627];rRNA binding [GO:0019843];structural constituent of ribosome [GO:0003735];translation [GO:0006412]	133	15	15	15	88.7	14.666	0	323.31	44624000000	404	1	0.112687	0.402657	0.695102	0.137056	1.06693	0.426687	0.338265	0.971215	0.414776	0.301867	1.11437	0.252103	0.290466		36.5022	27.8969	32.4483	29.8784	45.9575	41.4387	26.0524	32.3231	39.2329	48.9749	35.8719	30.6259	40.7202	43.2709	37.6896	50.1097	47.1503
50S ribosomal protein L5	rplE rpl5 sll1808	P73308	RL5_SYNY3	ribosomal large subunit assembly [GO:0000027];translation [GO:0006412]	cytosolic large ribosomal subunit [GO:0022625]	RNA binding [GO:0003723];rRNA binding [GO:0019843];structural constituent of ribosome [GO:0003735];tRNA binding [GO:0000049]	cytosolic large ribosomal subunit [GO:0022625];ribosomal large subunit assembly [GO:0000027];RNA binding [GO:0003723];rRNA binding [GO:0019843];structural constituent of ribosome [GO:0003735];translation [GO:0006412];tRNA binding [GO:0000049]	180	26	26	26	93.9	20.23	0	323.31	83636000000	662	1	0.177887	1.07661	0.35621	0.325396	1.12753	0.419548	0.343585	1.35592	0.299618	0.450327	1.54712	0.128183	0.407066		36.1446	31.34	38.1172	29.4507	52.6268	49.8668	34.4431	34.9179	36.8066	56.16	48.7045	39.7168	41.7577	52.8754	48.3952	53.4129	45.4874
50S ribosomal protein L24	rplX rpl24 sll1807	P73309	RL24_SYNY3	translation [GO:0006412]	ribosome [GO:0005840]	rRNA binding [GO:0019843];structural constituent of ribosome [GO:0003735]	ribosome [GO:0005840];rRNA binding [GO:0019843];structural constituent of ribosome [GO:0003735];translation [GO:0006412]	115	9	9	9	59.1	12.823	0	323.31	21079000000	261	1	0.105547	0.31168	0.724048	0.155136	0.540379	0.607168	0.234505	0.555488	0.568493	0.261347	1.26819	0.138437	0.512986		19.8988	19.6892	28.0062	23.2995	38.2616	20.7079	21.4193	25.7874	35.5627	34.6689	24.179	21.8836	32.8193	31.5841	30.5329	29.5138	27.1728
50S ribosomal protein L14	rplN rpl14 sll1806	P73310	RL14_SYNY3	translation [GO:0006412]	cytosolic large ribosomal subunit [GO:0022625]	large ribosomal subunit rRNA binding [GO:0070180];structural constituent of ribosome [GO:0003735]	cytosolic large ribosomal subunit [GO:0022625];large ribosomal subunit rRNA binding [GO:0070180];structural constituent of ribosome [GO:0003735];translation [GO:0006412]	122	12	12	12	81.1	13.294	0	323.31	37987000000	338	1	0.102107	1.08401	0.378307	0.272536	0.484495	0.664325	0.183865	1.18443	0.340827	0.404487	1.92519	0.0882383	0.439426		31.2246	27.0102	34.693	28.2902	42.3981	34.6482	26.2754	30.7943	43.5256	40.9721	41.3749	32.2757	38.513	43.1063	40.7095	45.8267	37.2791
30S ribosomal protein S17	rpsQ rps17 ssl3437	P73311	RS17_SYNY3	translation [GO:0006412]	cytosolic small ribosomal subunit [GO:0022627]	rRNA binding [GO:0019843];structural constituent of ribosome [GO:0003735]	cytosolic small ribosomal subunit [GO:0022627];rRNA binding [GO:0019843];structural constituent of ribosome [GO:0003735];translation [GO:0006412]	81	7	7	7	56.8	9.2887	0	213.7	23961000000	177	1	0.196567	0.84096	0.416543	0.301516	0.435751	0.664323	0.216125	0.69985	0.490195	0.290287	1.3094	0.140754	0.473726		35.5804	25.2137	34.7074	32.4226	51.5688	47.8023	28.6754	32.9748	43.216	52.6722	38.0173	37.0751	44.9445	50.27	46.4818	53.4277	36.0492
50S ribosomal protein L29	rpmC rpl29 ssl3436	P73312	RL29_SYNY3	translation [GO:0006412]	cytosolic large ribosomal subunit [GO:0022625]	structural constituent of ribosome [GO:0003735]	cytosolic large ribosomal subunit [GO:0022625];structural constituent of ribosome [GO:0003735];translation [GO:0006412]	73	8	8	8	74	8.5455	0	243.84	9810700000	245	1	-0.133853	0.388587	0.679124	0.164176	0.149246	0.859594	0.109645	0.290293	0.722743	0.219127	1.05859	0.170567	0.532446		13.6801	11.926	13.5467	7.86545	13.6718	11.9763	10.3837	8.80177	7.42758	18.3826	16.8489	13.0004	13.9798	13.017	10.5326	17.2212	16.9933
50S ribosomal protein L16	rplP rpl16 sll1805	P73313	RL16_SYNY3	translation [GO:0006412]	cytosolic large ribosomal subunit [GO:0022625]	rRNA binding [GO:0019843];structural constituent of ribosome [GO:0003735];tRNA binding [GO:0000049]	cytosolic large ribosomal subunit [GO:0022625];rRNA binding [GO:0019843];structural constituent of ribosome [GO:0003735];translation [GO:0006412];tRNA binding [GO:0000049]	139	8	8	8	60.4	16.035	0	302.62	13467000000	240	1	0.198427	0.681653	0.438395	0.369516	0.509807	0.579986	0.333005	0.999688	0.341364	0.554947	1.67128	0.0686839	0.729206		24.0307	14.3486	24.5469	20.3327	38.1346	26.3751	16.4743	23.5506	30.9419	41.2285	32.3184	21.2675	31.6574	27.8658	38.9538	36.4063	25.2567
30S ribosomal protein S3	rpsC rps3 sll1804	P73314	RS3_SYNY3	cytoplasmic translation [GO:0002181]	cytosolic small ribosomal subunit [GO:0022627]	rRNA binding [GO:0019843];structural constituent of ribosome [GO:0003735]	cytoplasmic translation [GO:0002181];cytosolic small ribosomal subunit [GO:0022627];rRNA binding [GO:0019843];structural constituent of ribosome [GO:0003735]	240	22	22	22	72.5	27.147	0	323.31	42758000000	489	1	0.158127	0.91476	0.364578	0.382736	0.911264	0.449129	0.365326	0.831334	0.440628	0.311167	1.30333	0.146014	0.452326		16.491	13.4016	19.0798	19.2906	28.1395	23.031	15.3508	20.8676	19.8586	27.0259	25.5258	17.1196	26.2014	29.8617	25.2234	22.5228	26.4042
50S ribosomal protein L22	rplV rpl22 sll1803	P73315	RL22_SYNY3	translation [GO:0006412]	large ribosomal subunit [GO:0015934]	rRNA binding [GO:0019843];structural constituent of ribosome [GO:0003735]	large ribosomal subunit [GO:0015934];rRNA binding [GO:0019843];structural constituent of ribosome [GO:0003735];translation [GO:0006412]	121	12	12	12	80.2	13.502	0	282.61	17640000000	206	1	0.174647	0.683934	0.467647	0.298296	0.604221	0.558382	0.286505	0.741911	0.44866	0.356987	1.67746	0.0729512	0.662266		17.0348	19.9198	25.561	25.6988	36.0925	20.5079	21.9819	26.8248	31.7458	38.3877	24.0436	25.2494	32.7148	36.6268	31.0968	28.9425	32.341
30S ribosomal protein S19	rpsS rps19 ssl3432	P73316	RS19_SYNY3	ribosomal small subunit assembly [GO:0000028];translation [GO:0006412]	cytosolic small ribosomal subunit [GO:0022627]	rRNA binding [GO:0019843];structural constituent of ribosome [GO:0003735]	cytosolic small ribosomal subunit [GO:0022627];ribosomal small subunit assembly [GO:0000028];rRNA binding [GO:0019843];structural constituent of ribosome [GO:0003735];translation [GO:0006412]	92	5	5	5	48.9	10.29	0	132.57	15341000000	106	1	0.221287	0.759136	0.427	0.321796	0.674253	0.526845	0.325485	1.0507	0.340349	0.483207	1.23927	0.139569	0.530626		26.6084	17.457	22.9317	14.0922	28.5898	27.0547	19.0873	21.2869	21.9172	38.3531	30.0519	22.4055	27.9015	30.8591	22.5803	30.0672	29.587
50S ribosomal protein L2	rplB rpl2 sll1802	P73317	RL2_SYNY3	cytoplasmic translation [GO:0002181]	cytosolic large ribosomal subunit [GO:0022625]	RNA binding [GO:0003723];rRNA binding [GO:0019843];structural constituent of ribosome [GO:0003735];transferase activity [GO:0016740]	cytoplasmic translation [GO:0002181];cytosolic large ribosomal subunit [GO:0022625];RNA binding [GO:0003723];rRNA binding [GO:0019843];structural constituent of ribosome [GO:0003735];transferase activity [GO:0016740]	276	18	18	18	63.4	30.433	0	323.31	41695000000	458	1	0.248747	1.34105	0.25014	0.595276	1.30859	0.406456	0.603045	1.11225	0.315857	0.558627	1.57771	0.0794763	0.666826		17.7816	13.7088	15.6672	12.1875	27.0757	20.8028	14.3149	17.1971	17.8963	32.5632	23.3085	18.6303	22.569	29.5099	34.2942	29.0229	32.8334
50S ribosomal protein L23	rplW rpl23 sll1801	P73318	RL23_SYNY3	ribosomal large subunit assembly [GO:0000027];translation [GO:0006412]	cytosolic large ribosomal subunit [GO:0022625]	RNA binding [GO:0003723];rRNA binding [GO:0019843];structural constituent of ribosome [GO:0003735]	cytosolic large ribosomal subunit [GO:0022625];ribosomal large subunit assembly [GO:0000027];RNA binding [GO:0003723];rRNA binding [GO:0019843];structural constituent of ribosome [GO:0003735];translation [GO:0006412]	101	10	10	10	73.3	11.526	0	104.58	20859000000	307	1	0.225287	1.25192	0.280924	0.463796	1.20955	0.38058	0.514405	1.00309	0.348774	0.469907	0.777959	0.314984	0.354086		20.6534	25.303	20.8355	15.8085	33.3272	27.9428	26.9132	21.5526	23.2973	33.1669	31.0685	32.202	23.6714	37.0198	32.6496	42.386	34.72
50S ribosomal protein L4	rplD rpl4 sll1800	P73319	RL4_SYNY3	translation [GO:0006412]	cytosolic ribosome [GO:0022626]	RNA binding [GO:0003723];rRNA binding [GO:0019843];structural constituent of ribosome [GO:0003735]	cytosolic ribosome [GO:0022626];RNA binding [GO:0003723];rRNA binding [GO:0019843];structural constituent of ribosome [GO:0003735];translation [GO:0006412]	210	17	17	17	65.7	23.356	0	323.31	38524000000	506	1	0.272027	2.64203	0.19561	0.596716	2.35527	0.395556	0.513505	2.7466	0.290737	0.674547	3.44372	0.0247059	0.677726	+	16.1047	17.5468	19.2245	19.5586	22.8517	19.1306	20.9887	19.731	24.2782	32.4056	26.7503	25.3582	24.3048	34.0652	34.1945	32.7476	27.0432
50S ribosomal protein L3	rplC rpl3 sll1799	P73320	RL3_SYNY3	translation [GO:0006412]	ribosome [GO:0005840]	rRNA binding [GO:0019843];structural constituent of ribosome [GO:0003735]	ribosome [GO:0005840];rRNA binding [GO:0019843];structural constituent of ribosome [GO:0003735];translation [GO:0006412]	213	18	18	18	82.6	22.741	0	323.31	51583000000	399	1	0.181147	1.6826	0.266513	0.343356	0.78894	0.531545	0.243405	1.19271	0.336171	0.417027	2.67949	0.0364938	0.599886	+	33.8952	27.8197	31.7013	28.0131	41.6697	37.6586	32.6258	28.0202	37.7968	50.2402	42.8726	36.2442	41.4463	45.0054	39.5716	39.5037	37.5384
Uncharacterized protein slr1894	slr1894	P73321	Y1894_SYNY3	cellular iron ion homeostasis [GO:0006879];response to stress [GO:0006950]	cell [GO:0005623]	ferric iron binding [GO:0008199];oxidoreductase activity, oxidizing metal ions [GO:0016722]	cell [GO:0005623];cellular iron ion homeostasis [GO:0006879];ferric iron binding [GO:0008199];oxidoreductase activity, oxidizing metal ions [GO:0016722];response to stress [GO:0006950]	156	13	13	13	73.1	17.755	0	323.31	21592000000	325	1	-0.141813	0.550038	0.550627	-0.248284	0.296422	0.737339	-0.187015	0.398595	0.661977	-0.202073	0.381127	0.585317	-0.207134		32.2005	24.3497	23.4558	19.0145	14.0143	21.7857	24.6624	16.8479	18.9207	17.5035	18.7808	16.7847	17.6644	22.4606	16.5733	17.5466	26.4793
SrrA	srrA	P73325	P73325_SYNY3					433	7	7	7	26.1	47.606	0	34.109	450660000	85	1	-0.252113	0.669118	0.44762	-0.351864	0.105036	0.898149	-0.0764946	0.281731	0.735299	-0.187073	1.08539	0.152013	-0.608354		0.202994	0.224803	0.125041	0.293133	0.125619	0.201633	0.210449	0.152861	0.108615	0.124479	0.172981	0.161251	0.142395	0.118621	0.131733	0.201775	0.141679
Acetylglutamate kinase (EC 2.7.2.8) (N-acetyl-L-glutamate 5-phosphotransferase) (NAG kinase) (NAGK)	argB slr1898	P73326	ARGB_SYNY3	arginine biosynthetic process [GO:0006526]	cytoplasm [GO:0005737]	acetylglutamate kinase activity [GO:0003991];arginine binding [GO:0034618];ATP binding [GO:0005524]	acetylglutamate kinase activity [GO:0003991];arginine binding [GO:0034618];arginine biosynthetic process [GO:0006526];ATP binding [GO:0005524];cytoplasm [GO:0005737]	297	9	9	9	32.3	31.525	0	90.361	2269700000	160	1	-0.072733	0.896871	0.420897	-0.265884	0.886137	0.5319	-0.207275	0.573187	0.650117	-0.139253	1.24449	0.201592	-0.332054		1.13501	0.812891	1.09435	0.972877	1.04191	1.08126	1.01652	0.857313	1.18747	0.710877	1.00995	0.900675	0.900733	0.837944	0.593201	1.02507	0.706712
Slr1900 protein	slr1900	P73328	P73328_SYNY3					247	9	9	9	47	27.406	0	249.99	1504900000	103	1	-0.315413	0.196632	0.815317	-0.103144	0.288385	0.737341	0.198705	0.00134934	0.998468	-0.00129314	0.50664	0.525013	0.193586		0.844641	1.04771	0.619541	0.726195	1.03974	0.661314	0.661697	0.784798	0.483971	0.834782	0.521624	0.853746	0.795686	0.905211	0.902684	0.957217	0.599027
ABC transporter	slr1901	P73329	P73329_SYNY3			ATP binding [GO:0005524];ATPase activity [GO:0016887]	ATP binding [GO:0005524];ATPase activity [GO:0016887]	326	4	4	4	17.5	36.62	0	7.3327	215020000	50	1	-0.523093	1.43248	0.258551	-0.574284	1.14213	0.379696	-0.579455	1.99448	0.251385	-0.454993	2.05443	0.0502367	-0.655574		0.125923	0.0997343	0.147836	0.139538	0.0964702	0.101202	0.0836114	0.0643995	0.0689594	0.10853	0.0992481	0.0856192	0.10538	0.0496083	0.0768822	0.0893132	0.073368
DNA-directed RNA polymerase subunit beta' (RNAP subunit beta') (EC 2.7.7.6) (RNA polymerase subunit beta') (Transcriptase subunit beta')	rpoC2 sll1789	P73334	RPOC2_SYNY3	transcription, DNA-templated [GO:0006351]	DNA-directed RNA polymerase complex [GO:0000428]	DNA binding [GO:0003677];DNA-directed 5'-3' RNA polymerase activity [GO:0003899]	DNA binding [GO:0003677];DNA-directed 5'-3' RNA polymerase activity [GO:0003899];DNA-directed RNA polymerase complex [GO:0000428];transcription, DNA-templated [GO:0006351]	1317	102	102	102	68.7	144.78	0	323.31	81059000000	2049	1	0.255247	1.9378	0.219479	0.482976	1.09854	0.410416	0.450525	1.76291	0.256126	0.574867	2.63555	0.0297667	0.767206	+	6.55279	4.8883	5.92113	4.94863	7.87144	7.77696	6.49011	5.74534	6.30236	9.7911	8.87583	7.13631	7.63417	9.34391	8.71979	10.562	7.52449
D-aminoacyl-tRNA deacylase (EC 3.1.1.96) (D-tyrosyl-tRNA deacylase)	dtd3 sll1786	P73335	DTD3_SYNY3	DNA catabolic process [GO:0006308]		D-aminoacyl-tRNA deacylase activity [GO:0051499];deoxyribonuclease activity [GO:0004536];endodeoxyribonuclease activity, producing 5'-phosphomonoesters [GO:0016888];metal ion binding [GO:0046872]	D-aminoacyl-tRNA deacylase activity [GO:0051499];deoxyribonuclease activity [GO:0004536];DNA catabolic process [GO:0006308];endodeoxyribonuclease activity, producing 5'-phosphomonoesters [GO:0016888];metal ion binding [GO:0046872]	261	5	5	5	22.2	29.258	0	81.635	831280000	84	1	-0.213533	2.06308	0.199952	-0.612424	1.36773	0.38498	-0.435215	1.43957	0.247948	-0.783653	2.15249	0.0496034	-0.623314	+	0.691552	0.645207	0.645761	0.529363	0.588628	0.471133	0.505591	0.702706	0.540435	0.473511	0.54885	0.428563	0.381293	0.27354	0.438179	0.394096	0.362485
30S ribosomal protein S20	rpsT rps20 ssl2233	P73336	RS20_SYNY3	translation [GO:0006412]	ribosome [GO:0005840]	rRNA binding [GO:0019843];structural constituent of ribosome [GO:0003735]	ribosome [GO:0005840];rRNA binding [GO:0019843];structural constituent of ribosome [GO:0003735];translation [GO:0006412]	97	5	5	5	47.4	10.702	0	184.81	11256000000	80	1	0.184427	0.25233	0.779904	0.106296	0.318883	0.720689	0.187225	0.951599	0.379137	0.391947	0.580756	0.464798	0.229446		25.3218	17.4861	24.5452	19.9281	31.8833	33.8811	23.2127	17.407	28.7122	33.2889	27.0861	24.5896	22.2413	30.6247	22.0009	39.0653	26.1111
Chromosome partition protein Smc	smc sll1120	P73340	SMC_SYNY3	chromosome condensation [GO:0030261];sister chromatid cohesion [GO:0007062]	chromosome [GO:0005694];cytoplasm [GO:0005737]	ATP binding [GO:0005524];DNA binding [GO:0003677]	ATP binding [GO:0005524];chromosome [GO:0005694];chromosome condensation [GO:0030261];cytoplasm [GO:0005737];DNA binding [GO:0003677];sister chromatid cohesion [GO:0007062]	1200	8	8	8	9.2	136.13	0	12.813	121830000	26	1	-0.180758	0.807283	0.360877	0.514355	0.943923	0.422677	0.497204	0.0893221	0.894221	0.116166	0.0116248	0.982442	0.0178246		0.00742707	0.015882			0.0141832	0.021662	0.0205523		0.0098122	0.00255612	0.0326128	0.0176471	0.0123382	0.0137486	0.0232858	0.0134106	0.0179111
Slr1194 protein	slr1194	P73342	P73342_SYNY3					222	4	4	4	32.9	25.17	0	123.46	965210000	116	1	-0.166493	0.341614	0.706977	-0.154604	0.105894	0.904759	-0.0625346	0.537907	0.602262	-0.209153	1.58913	0.0865625	-0.596874		0.557487	0.79561	0.477467	0.707905	0.578957	0.479934	0.714766	0.614972	0.539536	0.428234	0.683628	0.730106	0.455894	0.482709	0.462425	0.58789	0.468069
Slr1196 protein	slr1196	P73344	P73344_SYNY3		outer membrane-bounded periplasmic space [GO:0030288]		outer membrane-bounded periplasmic space [GO:0030288]	429	9	9	9	33.3	48.001	0	57.31	419970000	83	1	0.054847	1.8676	0.222483	0.887396	1.24477	0.420724	0.994925	0.582879	0.476446	0.510807	0.412701	0.509319	0.340766		0.098982	0.0810881	0.0900127	0.0622289	0.10664	0.0279406	0.137152	0.0731242	0.103234	0.20043	0.271079	0.20773	0.140318	0.114326	0.114959	0.300746	0.229345
UPF0145 protein sll118	sll1118	P73346	Y1118_SYNY3					108	4	4	4	31.5	11.45	0	70.304	639000000	46	1	-0.308953	0.26071	0.784222	-0.0983838	0.216503	0.801547	-0.141215	0.741246	0.424461	-0.459213	0.963638	0.286983	-0.293134		1.03764	0.813793	0.805564	0.599831	0.622017	0.826168	0.796001	0.678111	0.661124	0.295058	0.6782	0.740196	0.670994	0.822408	0.65148	0.615622	0.714395
Rehydrin	slr1198	P73348	P73348_SYNY3	cell redox homeostasis [GO:0045454]	cell [GO:0005623]	identical protein binding [GO:0042802];peroxiredoxin activity [GO:0051920]	cell [GO:0005623];cell redox homeostasis [GO:0045454];identical protein binding [GO:0042802];peroxiredoxin activity [GO:0051920]	211	16	16	16	67.3	23.559	0	323.31	116890000000	483	1	-0.066993	0.407035	0.707237	-0.121484	0.733169	0.609442	-0.160075	0.187491	0.850665	-0.0694731	0.74912	0.452573	-0.183794		128.098	84.6439	107.379	99.1148	99.8456	120.476	91.1988	92.7576	103.716	86.4187	113.079	91.6129	106.151	85.5518	80.3871	104.193	95.7495
Slr1201 protein	slr1201	P73351	P73351_SYNY3		integral component of membrane [GO:0016021];plasma membrane [GO:0005886]	transmembrane transporter activity [GO:0022857]	integral component of membrane [GO:0016021];plasma membrane [GO:0005886];transmembrane transporter activity [GO:0022857]	410	4	4	4	13.7	45.084	0	51.237	742510000	75	1	-0.158593	0.62042	0.50082	0.287776	1.3	0.390313	0.404245	1.00484	0.393676	0.328467	1.19686	0.236016	-0.293574		0.847162	0.597924	0.642591	0.592435	0.862279	0.805528	0.795726	0.620926	0.390933	0.616798	1.15147	1.0143	0.681919	0.990773	0.571289	1.1441	0.871694
Ferredoxin component	slr1205	P73355	P73355_SYNY3			2 iron, 2 sulfur cluster binding [GO:0051537];oxidoreductase activity [GO:0016491]	2 iron, 2 sulfur cluster binding [GO:0051537];oxidoreductase activity [GO:0016491]	164	6	6	6	52.4	17.559	0	26.235	961570000	37	1	0.353447	0.493229	0.5253	-0.392984	0.0159997	0.982159	0.0189654	0.146398	0.843551	-0.126013	0.397626	0.55179	-0.248994		1.15758	0.930536	1.06405	0.539475	0.468664	0.971312	1.29697	1.03691	0.872842	0.865179	0.347524	0.958386	0.799778	0.48301	0.57694	1.02003	1.05482
Slr1207 protein	slr1207	P73357	P73357_SYNY3					514	7	7	7	24.5	55.776	0	24.291	183930000	25	1	-0.800664	0.52822	0.426813	-1.15704	0.0322149	0.952913	-0.0936347	0.0468766	0.94468	0.119687	0.262927	0.609593	0.601606		0.0488096	0.0152699	0.0877214	0.126712	0.013875		0.0164787	0.00558044	0.0973006	0.0299453	0.00883951	0.0120734	0.00462886	0.0399303	0.105667	0.0487592	0.00470201
Short-chain alcohol dehydrogenase family	slr1208	P73359	P73359_SYNY3			oxidoreductase activity [GO:0016491]	oxidoreductase activity [GO:0016491]	657	13	13	13	27.1	71.553	0	153.66	1421500000	112	1	-0.202073	0.866452	0.411212	-0.303444	0.477202	0.66586	-0.176555	0.19543	0.843573	-0.0734131	0.323108	0.674563	-0.137354		0.317122	0.223746	0.314356	0.376867	0.27449	0.260545	0.206719	0.237565	0.375814	0.238204	0.250292	0.251247	0.326232	0.196381	0.200086	0.258389	0.225046
3-dehydroquinate dehydratase (3-dehydroquinase) (EC 4.2.1.10) (Type II DHQase)	aroQ sll1112	P73367	AROQ_SYNY3	aromatic amino acid family biosynthetic process [GO:0009073];chorismate biosynthetic process [GO:0009423]		3-dehydroquinate dehydratase activity [GO:0003855]	3-dehydroquinate dehydratase activity [GO:0003855];aromatic amino acid family biosynthetic process [GO:0009073];chorismate biosynthetic process [GO:0009423]	152	2	2	2	17.8	16.374	0	8.5843	229870000	19	1	-0.147473	0.95433	0.41171	-0.268024	0.553578	0.56423	-0.316935	1.23883	0.343933	-0.354753	2.14186	0.0655833	-0.505454		0.385235	0.501435	0.411018	0.375589	0.328901	0.360609	0.43862	0.486123	0.351255	0.217829	0.276755	0.440123	0.316367	0.325116	0.309217	0.203094	0.309732
Magnesium transporter MgtE	mgtE	P73368	P73368_SYNY3		integral component of membrane [GO:0016021];plasma membrane [GO:0005886]	magnesium ion transmembrane transporter activity [GO:0015095];metal ion binding [GO:0046872]	integral component of membrane [GO:0016021];magnesium ion transmembrane transporter activity [GO:0015095];metal ion binding [GO:0046872];plasma membrane [GO:0005886]	463	11	11	11	26.3	51.1	0	124.65	1311300000	156	1	-0.142973	1.70473	0.306745	-0.265684	2.13699	0.396042	-0.304755	0.773122	0.569486	-0.170633	2.83438	0.107363	-0.270094		0.552984	0.512788	0.539865	0.539774	0.48718	0.599324	0.50109	0.485752	0.476052	0.353179	0.499198	0.500582	0.426132	0.407713	0.36923	0.48067	0.44922
Slr2070 protein	slr2070	P73370	P73370_SYNY3					284	8	8	8	38.7	31.874	0	268.07	4285900000	179	1	-0.215633	1.35833	0.267509	-0.444624	0.940664	0.45263	-0.317555	1.63367	0.268223	-0.412513	2.91688	0.0283604	-0.684054	+	4.20793	3.61184	3.29818	3.15498	2.74143	3.55465	3.29538	3.04701	2.94015	1.95677	2.89906	3.15793	2.72088	2.10034	1.77484	2.86556	2.52292
Uncharacterized RNA methyltransferase sll1967 (EC 2.1.1.-)	sll1967	P73374	Y1967_SYNY3	RNA processing [GO:0006396]		4 iron, 4 sulfur cluster binding [GO:0051539];metal ion binding [GO:0046872];RNA binding [GO:0003723];RNA methyltransferase activity [GO:0008173]	4 iron, 4 sulfur cluster binding [GO:0051539];metal ion binding [GO:0046872];RNA binding [GO:0003723];RNA methyltransferase activity [GO:0008173];RNA processing [GO:0006396]	463	8	8	8	19.9	51.522	0	28.138	1192900000	95	1	-0.055453	0.0965201	0.921734	-0.0409038	0.141705	0.888899	-0.0606746	1.29691	0.393718	-0.241093	1.736	0.140774	-0.328814		0.450659	0.539066	0.467511	0.428934	0.379909	0.535667	0.487692	0.462939	0.318197	0.396851	0.534026	0.522057	0.459416	0.377651	0.332055	0.515955	0.412394
L-threonine dehydratase (EC 4.3.1.19) (Threonine deaminase)	ilvA	P73375	P73375_SYNY3	isoleucine biosynthetic process [GO:0009097]		L-threonine ammonia-lyase activity [GO:0004794];pyridoxal phosphate binding [GO:0030170]	isoleucine biosynthetic process [GO:0009097];L-threonine ammonia-lyase activity [GO:0004794];pyridoxal phosphate binding [GO:0030170]	508	20	20	20	46.3	56.545	0	323.31	3627900000	300	1	-0.122453	0.939678	0.446937	-0.220344	0.98449	0.512477	-0.214395	0.0506506	0.960696	-0.0176331	0.646366	0.52657	-0.145994		1.28959	0.912334	1.07704	1.06935	0.886951	1.06578	0.784281	0.901059	1.12865	0.924901	1.06902	0.865244	0.92882	0.77573	0.84031	0.996345	0.777812
Cell division protein SepF	sepF slr2073	P73376	SEPF_SYNY3	cell septum assembly [GO:0090529]	cytoplasm [GO:0005737]		cell septum assembly [GO:0090529];cytoplasm [GO:0005737]	186	7	7	7	50	20.533	0	323.31	1838400000	145	1	0.495187	1.75181	0.2188	0.575616	0.551141	0.54465	0.423425	1.14584	0.304403	0.571247	0.87004	0.274784	0.365886		1.8455	1.89715	1.15915	1.21557	1.99574	2.61354	1.80593	1.81704	2.3784	2.68528	2.90006	2.47337	2.07941	2.38407	2.03551	3.40751	2.8406
Sll1739 protein	sll1739	P73385	P73385_SYNY3					359	4	4	4	15	41.229	0	9.64	396460000	54	1	-0.0484331	0.558406	0.619078	-0.154564	1.17102	0.50076	-0.199435	0.763192	0.486894	-0.263293	2.38093	0.0651228	-0.446654		0.207446	0.179336	0.174751	0.150625	0.16185	0.20944	0.198546	0.150464	0.168275	0.127271	0.186932	0.186633	0.132345	0.140742	0.142743	0.150373	0.133693
Poly(3-hydroxyalkanoate) polymerase subunit PhaE (PHA polymerase) (PHB synthase subunit PhaE) (Poly(3-hydroxybutyrate) polymerase subunit PhaE) (PHB polymerase) (Poly(hydroxyalkanoic acid) synthase subunit PhaE) (PHA synthase) (Polyhydroxyalkanoic acid synthase subunit PhaE)	phaE slr1829	P73389	PHAE_SYNY3	poly-hydroxybutyrate biosynthetic process [GO:0042619]	cytoplasm [GO:0005737]		cytoplasm [GO:0005737];poly-hydroxybutyrate biosynthetic process [GO:0042619]	330	7	7	7	30.3	38.047	0	39.091	384670000	22	1	0.086147	0.641544	0.44933	0.379376	0.0770524	0.917121	0.0777654	0.412482	0.628819	0.266747	0.992917	0.164298	0.679706		0.140341	0.143054	0.0957072	0.157949	0.0759833	0.0763889	0.120445	0.174221	0.191537	0.101241	0.150735	0.151142	0.141893	0.10371	0.256156	0.0889734	0.187803
Poly(3-hydroxyalkanoate) polymerase subunit PhaC (PHA polymerase) (EC 2.3.1.-) (PHB synthase subunit PhaC) (Poly(3-hydroxybutyrate) polymerase subunit PhaC) (PHB polymerase) (Poly(hydroxyalkanoic acid) synthase subunit PhaC) (PHA synthase) (Polyhydroxyalkanoic acid synthase subunit PhaC)	phaC phbC slr1830	P73390	PHAC_SYNY3	poly-hydroxybutyrate biosynthetic process [GO:0042619]	cytoplasm [GO:0005737]	transferase activity, transferring acyl groups [GO:0016746]	cytoplasm [GO:0005737];poly-hydroxybutyrate biosynthetic process [GO:0042619];transferase activity, transferring acyl groups [GO:0016746]	378	6	6	6	25.4	42.96	0	18.416	264450000	19	1	0.109667	0.430476	0.539794	-0.550584	0.881709	0.417471	-0.604155	0.337574	0.663669	-0.290093	0.206147	0.732848	-0.188874		0.143459	0.116309	0.16881	0.139306	0.0599053	0.14692	0.121367	0.144575	0.0979366	0.13615	0.106704	0.125493	0.0912249	0.0198382	0.143895	0.133251	0.0746866
Uncharacterized protein sll1735	sll1735	P73392	Y1735_SYNY3		extracellular space [GO:0005615]		extracellular space [GO:0005615]	133	2	2	2	30.8	14.105	0	208.43	448030000	55	1	0.158687	0.906896	0.322068	0.581536	1.11668	0.398593	0.496525	1.09044	0.337479	0.484527	0.483839	0.457031	0.363826		0.446246	0.548185	0.271622	0.273674	0.456608	0.382175	0.615121	0.422374	0.25628	0.565528	0.575418	0.628149	0.288526	0.868758	0.68772	0.645647	0.555552
Sll1734 protein	sll1734	P73393	P73393_SYNY3					431	6	6	6	13.7	50.038	0	81.907	609140000	84	1	1.26929	1.34527	0.218438	1.2737	1.54966	0.427784	1.52903	1.58248	0.285333	1.94959	0.951428	0.137981	1.32153		0.0461223	0.0561852	0.0322194	0.048165	0.142134	0.198486	0.142452	0.108022	0.0606727	0.250985	0.0819724	0.167285	0.0615828	0.238941	0.234051	0.460674	0.191816
OmpR subfamily	slr1837	P73404	P73404_SYNY3	phosphorelay signal transduction system [GO:0000160];regulation of transcription, DNA-templated [GO:0006355];transcription, DNA-templated [GO:0006351]	intracellular [GO:0005622]	DNA binding [GO:0003677]	DNA binding [GO:0003677];intracellular [GO:0005622];phosphorelay signal transduction system [GO:0000160];regulation of transcription, DNA-templated [GO:0006355];transcription, DNA-templated [GO:0006351]	234	2	2	2	15.8	25.655	0	9.7329	90327000	9	1	0.765328	1.77362	0.203727	1.44734	1.95513	0.32	1.63651	1.31297	0.246329	1.03409	1.5017	0.0604058	1.21819		0.0368194		0.0331413		0.0648355	0.0815262	0.0134789	0.0642969		0.0588005	0.0701984	0.064448	0.0506453	0.0805108	0.132328	0.148313	0.102365
Pyruvate dehydrogenase E1 beta subunit	pdhB	P73405	P73405_SYNY3	metabolic process [GO:0008152]		catalytic activity [GO:0003824]	catalytic activity [GO:0003824];metabolic process [GO:0008152]	324	18	18	18	54.9	35.709	0	323.31	10330000000	305	1	0.150567	0.382121	0.702885	0.138616	1.16674	0.437211	0.285305	0.615958	0.588308	0.189427	0.027811	0.968641	0.0110657		2.96619	3.63646	2.59507	3.70078	4.26347	4.09967	3.8762	3.44808	3.94054	3.44683	3.58826	4.37893	3.33843	4.35848	3.12313	4.16356	3.78448
Carbon dioxide-concentrating mechanism protein CcmK homolog 3	ccmK3 slr1838	P73406	CCMK3_SYNY3					103	2	2	2	18.4	11.003	0	44.07	526660000	30	1	0.241647	0.918222	0.320907	0.559136	1.07175	0.395502	0.549785	0.148022	0.826029	0.187247	0.103296	0.858195	0.0873258		0.643722	1.01546	0.533098	0.492887	1.16298	1.07796	0.986399	0.837925	0.531077	0.975404	1.35311	1.15972	0.712307	1.49312	0.831042	1.15606	1.39658
Carbon dioxide-concentrating mechanism protein CcmK homolog 4	ccmK4 slr1839	P73407	CCMK4_SYNY3					112	5	5	5	65.2	11.903	0	232.53	4354100000	99	1	-0.146693	0.874187	0.416123	0.286956	0.739223	0.512705	0.305605	0.947465	0.401068	0.331927	0.00339669	0.993864	-0.0018543		3.15581	2.96233	2.9692	3.35806	5.31374	3.18106	3.17123	3.04532	2.55849	3.79019	4.24564	3.97562	3.72663	4.91546	4.33068	4.66157	3.97511
Uncharacterized protein slr1840	slr1840	P73408	Y1840_SYNY3	organic acid phosphorylation [GO:0031388]		glycerate kinase activity [GO:0008887]	glycerate kinase activity [GO:0008887];organic acid phosphorylation [GO:0031388]	371	2	2	2	3.8	39.231	0	8.891	36185000	6	1	0.832842	0.178883	0.797335	0.186599	1.07635	0.385512	0.6061	1.64029	0.257035	0.885682	0.909459	0.167706	0.876441		0.0173636				0.0236098	0.0250214	0.0231321	0.0144038	0.0213117	0.0478635		0.0194576		0.0213773	0.0148952	0.028872	0.0220572
Slr1841 protein	slr1841	P73409	P73409_SYNY3	carbohydrate transport [GO:0008643]	integral component of membrane [GO:0016021]	porin activity [GO:0015288]	carbohydrate transport [GO:0008643];integral component of membrane [GO:0016021];porin activity [GO:0015288]	630	22	13	13	45.9	67.6	0	323.31	6776400000	411	1	-0.367773	0.559392	0.520242	-0.304044	0.189787	0.821379	-0.141755	0.007422	0.991196	-0.00713307	1.21939	0.141899	-0.533994		2.65352	2.16105	5.57345	3.47456	3.2728	1.4289	3.12714	3.00277	2.76886	2.73468	1.93453	2.52045	3.12937	2.9993	2.76867	1.89844	2.63827
Cysteine synthase (CSase) (EC 2.5.1.47) (O-acetylserine (thiol)-lyase) (OAS-TL) (O-acetylserine sulfhydrylase)	cysK slr1842	P73410	CYSK_SYNY3	cysteine biosynthetic process from serine [GO:0006535]	cytoplasm [GO:0005737]	cysteine synthase activity [GO:0004124];L-cysteine desulfhydrase activity [GO:0080146];pyridoxal phosphate binding [GO:0030170];transferase activity [GO:0016740]	cysteine biosynthetic process from serine [GO:0006535];cysteine synthase activity [GO:0004124];cytoplasm [GO:0005737];L-cysteine desulfhydrase activity [GO:0080146];pyridoxal phosphate binding [GO:0030170];transferase activity [GO:0016740]	312	18	18	18	58	33.173	0	167.63	3369500000	256	1	-0.0640131	0.17458	0.871986	-0.062484	0.634532	0.600298	0.193785	0.234104	0.824857	0.0752069	0.248292	0.776962	-0.0708943		2.11845	2.34166	1.58115	1.81759	2.06555	1.94964	2.51829	1.83082	1.35603	1.93518	1.51077	2.22357	1.70595	2.00253	2.06636	2.22764	2.25214
Glucose-6-phosphate 1-dehydrogenase (G6PD) (EC 1.1.1.49)	zwf slr1843	P73411	G6PD_SYNY3	glucose metabolic process [GO:0006006];pentose-phosphate shunt [GO:0006098]		glucose-6-phosphate dehydrogenase activity [GO:0004345];NADP binding [GO:0050661]	glucose metabolic process [GO:0006006];glucose-6-phosphate dehydrogenase activity [GO:0004345];NADP binding [GO:0050661];pentose-phosphate shunt [GO:0006098]	509	25	25	25	54.4	57.885	0	323.31	10544000000	559	1	-0.235093	1.12933	0.283978	-0.522844	0.83953	0.433541	-0.497335	0.759963	0.426114	-0.423913	0.838907	0.276203	-0.386534		5.20576	3.00556	4.41702	3.70283	2.0173	2.96886	2.82596	3.14725	3.70556	2.33589	2.44068	2.34482	2.7307	1.94494	2.77386	2.2871	2.19435
UvrABC system protein A (UvrA protein) (Excinuclease ABC subunit A)	uvrA slr1844	P73412	UVRA_SYNY3	nucleotide-excision repair [GO:0006289]	cytoplasm [GO:0005737];excinuclease repair complex [GO:0009380]	ATP binding [GO:0005524];ATPase activity [GO:0016887];DNA binding [GO:0003677];excinuclease ABC activity [GO:0009381];metal ion binding [GO:0046872]	ATP binding [GO:0005524];ATPase activity [GO:0016887];cytoplasm [GO:0005737];DNA binding [GO:0003677];excinuclease ABC activity [GO:0009381];excinuclease repair complex [GO:0009380];metal ion binding [GO:0046872];nucleotide-excision repair [GO:0006289]	970	18	18	18	23.7	107.48	0	97.09	1162300000	152	1	-0.128893	0.101694	0.923141	-0.0345239	0.588547	0.707891	-0.103175	0.199596	0.804772	-0.149113	1.00544	0.244588	0.350026		0.131425	0.142165	0.14837	0.116874	0.123847	0.148312	0.125186	0.0612432	0.134343	0.168039	0.120348	0.119748	0.112771	0.126642	0.17297	0.130274	0.136256
Histidinol-phosphate aminotransferase	hisC	P73417	P73417_SYNY3	cobalamin biosynthetic process [GO:0009236]		pyridoxal phosphate binding [GO:0030170];transaminase activity [GO:0008483]	cobalamin biosynthetic process [GO:0009236];pyridoxal phosphate binding [GO:0030170];transaminase activity [GO:0008483]	352	2	2	2	11.4	38.932	0	5.1217	46950000	17	1	0.572238	1.27903	0.221922	1.23613	2.07824	0.352	1.60634	0.36653	0.604797	0.601506	0.165171	0.753407	0.263136		0.00475186	0.0327499	0.0097815			0.0155085	0.032791	0.0292442	0.007021	0.0128407	0.0147717	0.030922	0.0174307	0.0419707	0.0400541	0.034067	0.0328035
DNA-binding protein HU	hup sll1712	P73418	DBH_SYNY3	chromosome condensation [GO:0030261];regulation of nucleic acid-templated transcription [GO:1903506]	cytosol [GO:0005829]	DNA binding [GO:0003677]	chromosome condensation [GO:0030261];cytosol [GO:0005829];DNA binding [GO:0003677];regulation of nucleic acid-templated transcription [GO:1903506]	100	14	14	14	78	10.891	0	323.31	32015000000	232	1	-0.283873	0.831244	0.418119	-0.302284	0.736938	0.522163	-0.291955	0.6566	0.533911	-0.243793	0.609548	0.451579	-0.238954		59.6401	48.089	53.2855	35.5488	39.0494	49.4195	41.9949	31.261	37.7497	32.3854	43.7128	39.437	42.0832	38.5251	26.6247	42.9182	42.309
Slr1535 protein	slr1535	P73420	P73420_SYNY3	carbohydrate metabolic process [GO:0005975]		catalytic activity [GO:0003824]	carbohydrate metabolic process [GO:0005975];catalytic activity [GO:0003824]	489	11	11	11	21.9	55.017	0	54.7	1275800000	112	1	0.423047	0.560142	0.471774	0.448496	0.203711	0.821655	0.119725	0.0654211	0.918699	0.0970669	0.0559006	0.921641	-0.0489742		0.643811	0.456357	0.458239	0.444831	0.283678	0.874668	0.832223	0.48545	0.694137	0.300091	1.04644	0.640681	0.933403	0.317279	0.404916	0.415442	0.568879
Slr1537 protein	slr1537	P73422	P73422_SYNY3			transferase activity, transferring glycosyl groups [GO:0016757]	transferase activity, transferring glycosyl groups [GO:0016757]	289	12	12	12	51.6	32.416	0	113.32	1512000000	194	1	0.111227	0.926361	0.435025	0.235056	0.405059	0.725797	0.125285	0.820511	0.49627	0.224887	1.24271	0.227165	0.294346		0.777551	0.609684	0.520465	0.533599	0.592968	0.733469	0.631757	0.634808	0.608906	0.640856	0.79426	0.715131	0.563064	0.764944	0.720661	0.758603	0.624942
Slr1540 protein	slr1540	P73424	P73424_SYNY3			catalytic activity [GO:0003824];coenzyme binding [GO:0050662]	catalytic activity [GO:0003824];coenzyme binding [GO:0050662]	311	12	12	12	52.1	35.092	0	323.31	1759700000	186	1	0.325867	0.0789616	0.920505	0.0672761	0.578934	0.546089	0.363125	0.239787	0.764761	0.187847	0.704086	0.340604	-0.364994		0.631743	1.14777	0.451868	0.534673	0.554488	0.781386	1.24612	1.10772	0.526532	0.529158	0.605032	0.922729	0.438325	0.899208	0.557364	0.746295	0.953427
Slr1541 protein	slr1541	P73425	P73425_SYNY3					210	4	4	4	28.1	24.188	0	12.667	1145800000	31	1	-0.259973	0.95879	0.279842	-0.890924	1.0319	0.389507	-0.623115	0.706233	0.434855	-0.461213	0.922641	0.200488	-0.569994		1.99807	0.748894	1.65907	1.22997	0.728412	1.16119	0.833956	0.753664	1.58897	0.778987	1.11488	0.725465	0.986487	0.535599	0.237367	0.892001	0.873327
2-C-methyl-D-erythritol 2,4-cyclodiphosphate synthase (MECDP-synthase) (MECPP-synthase) (MECPS) (EC 4.6.1.12)	ispF slr1542	P73426	ISPF_SYNY3	isopentenyl diphosphate biosynthetic process, methylerythritol 4-phosphate pathway [GO:0019288];terpenoid biosynthetic process [GO:0016114]		2-C-methyl-D-erythritol 2,4-cyclodiphosphate synthase activity [GO:0008685];metal ion binding [GO:0046872]	2-C-methyl-D-erythritol 2,4-cyclodiphosphate synthase activity [GO:0008685];isopentenyl diphosphate biosynthetic process, methylerythritol 4-phosphate pathway [GO:0019288];metal ion binding [GO:0046872];terpenoid biosynthetic process [GO:0016114]	161	4	4	4	36	17.411	0	18.526	596340000	42	1	0.156887	0.168824	0.832868	0.113056	0.309455	0.730147	0.183305	0.202756	0.809326	0.126427	0.0389718	0.946943	0.0350458		0.604833	0.888556	0.622727	0.437037	0.337375	0.436637	0.834534	0.690443	0.551943	0.612071	0.549497	0.728741	0.473118	0.574877	0.670399	0.639988	0.623687
RNA polymerase sigma-E factor	rpoE	P73431	P73431_SYNY3	DNA-templated transcription, initiation [GO:0006352]		DNA binding [GO:0003677];DNA binding transcription factor activity [GO:0003700];sigma factor activity [GO:0016987]	DNA binding [GO:0003677];DNA binding transcription factor activity [GO:0003700];DNA-templated transcription, initiation [GO:0006352];sigma factor activity [GO:0016987]	223	2	2	2	14.8	25.621	0	16.445	92154000	31	1	1.06155	2.49687	0.2696	1.67851	0.946678	0.383082	1.09832	1.56991	0.240634	1.10666	1.64889	0.0467639	1.26926	+		0.0176368	0.0403656	0.0309918	0.0273451	0.0464721	0.0627667	0.0492031		0.0901125	0.0779603	0.0794328	0.0380376	0.110011	0.0962141	0.111361	0.0776804
Sll1466 protein	sll1466	P73434	P73434_SYNY3			transferase activity, transferring glycosyl groups [GO:0016757]	transferase activity, transferring glycosyl groups [GO:0016757]	413	6	6	6	16.9	47.141	0	9.7418	927880000	41	1	-0.068533	0.116955	0.920908	0.0334562	0.094409	0.922854	0.0345254	0.0982995	0.912082	-0.048233	0.850738	0.401389	-0.205674		0.381726	0.33923	0.298411	0.338758	0.362092	0.372421	0.39342	0.351353	0.237944	0.305146	0.365941	0.401808	0.363965	0.358644	0.277314	0.376003	0.330265
UPF0061 protein sll1464	sll1464	P73436	YZ64_SYNY3					477	5	5	5	18.9	54.04	0	25.57	250510000	58	1	-0.277533	0.100742	0.886342	-0.198504	0.111649	0.868906	-0.199495	0.147244	0.820705	0.253967	0.871409	0.179714	0.861446		0.0174082	0.122728	0.0593245	0.0782768	0.0895245	0.078591	0.0609827	0.0185478	0.0255983	0.149174	0.0909352	0.038321	0.0139826	0.0941318	0.0973276	0.0894371	0.0883206
ATP-dependent zinc metalloprotease FtsH 4 (EC 3.4.24.-)	ftsH4 sll1463	P73437	FTSH4_SYNY3	photoinhibition [GO:0010205];photosystem II repair [GO:0010206];proteolysis [GO:0006508];PSII associated light-harvesting complex II catabolic process [GO:0010304]	integral component of membrane [GO:0016021];thylakoid membrane [GO:0042651]	ATP binding [GO:0005524];ATP-dependent peptidase activity [GO:0004176];metalloendopeptidase activity [GO:0004222];metallopeptidase activity [GO:0008237];zinc ion binding [GO:0008270]	ATP binding [GO:0005524];ATP-dependent peptidase activity [GO:0004176];integral component of membrane [GO:0016021];metalloendopeptidase activity [GO:0004222];metallopeptidase activity [GO:0008237];photoinhibition [GO:0010205];photosystem II repair [GO:0010206];proteolysis [GO:0006508];PSII associated light-harvesting complex II catabolic process [GO:0010304];thylakoid membrane [GO:0042651];zinc i…	628	37	33	33	56.4	68.198	0	323.31	11610000000	568	1	-0.048233	0.707537	0.519995	-0.211864	0.166451	0.86926	-0.0664546	1.04339	0.441441	-0.233933	1.69458	0.101729	-0.448054		2.68163	2.54547	2.85476	2.74143	1.97045	2.80365	2.44434	2.27725	2.82782	2.01806	2.45153	2.48127	2.46292	2.05669	1.63931	2.39881	1.93548
Hydrogenase expression/formation protein HypE	hypE	P73438	P73438_SYNY3					345	3	3	3	14.5	36.425	0.0026624	2.2227	81135000	6	1	0.107106	0.100752	0.885494	-0.210561	0.0381957	0.947174	-0.0860393	0.369386	0.608721	-0.5396	0.178599	0.737181	-0.328608		0.0426861	0.0817597	0.0688964	0.0448928			0.0445677	0.0354835	0.0460292	0.0786326	0.0198886	0.0767856	0.065738	0.0172462	0.0216858	0.0286408	0.036204
Sll1461 protein	sll1461	P73439	P73439_SYNY3					220	3	3	3	12.7	25.524	0	42.186	161240000	40	1	-0.0434529	0.0343058	0.962294	0.0368762	0.856468	0.44606	0.421845	0.58889	0.44766	-0.712753	0.0347083	0.948301	0.0351459		0.189203	0.0882129	0.075912	0.135835	0.0920095	0.165765	0.122848	0.0695885	0.0916699	0.104855	0.174837	0.0793008	0.0637192	0.164439	0.123861	0.178503	0.134352
Putative 5'-nucleotidase alr3139 (EC 3.1.3.5) (Nucleoside 5'-monophosphate phosphohydrolase)	sll1459	P73440	Y1459_SYNY3		cytoplasm [GO:0005737]	5'-nucleotidase activity [GO:0008253];metal ion binding [GO:0046872];nucleotide binding [GO:0000166]	5'-nucleotidase activity [GO:0008253];cytoplasm [GO:0005737];metal ion binding [GO:0046872];nucleotide binding [GO:0000166]	225	3	3	3	22.2	24.907	0	25.566	149900000	33	1	1.41877	0.537932	0.422239	1.17478	0.279553	0.680027	0.773924	0.4195	0.559298	0.713047	1.56744	0.0430711	2.05709	+	0.0764526	0.0424655	0.00741556	0.166239		0.0841034	0.0991216	0.143587	0.085721	0.177301	0.109978		0.161362	0.197569	0.16687	0.109062
Peptide deformylase (PDF) (EC 3.5.1.88) (Polypeptide deformylase)	def slr1549	P73441	DEF_SYNY3	co-translational protein modification [GO:0043686];N-terminal protein amino acid modification [GO:0031365];peptidyl-methionine modification [GO:0018206];translation [GO:0006412]		metal ion binding [GO:0046872];peptide deformylase activity [GO:0042586]	co-translational protein modification [GO:0043686];metal ion binding [GO:0046872];N-terminal protein amino acid modification [GO:0031365];peptide deformylase activity [GO:0042586];peptidyl-methionine modification [GO:0018206];translation [GO:0006412]	187	5	5	5	42.8	21.026	0	23.206	614630000	52	1	0.200607	0.57433	0.443636	0.565536	0.067982	0.917459	0.108105	0.2417	0.737523	0.275607	0.0220068	0.964985	0.0399657		0.65816	0.235017	0.245939	0.167094	0.366358	0.408443	0.543308	0.172587	0.28881	0.421958	0.783814	0.44794	0.211462	0.351045	0.634324	0.561601	0.350259
Lysine--tRNA ligase (EC 6.1.1.6) (Lysyl-tRNA synthetase) (LysRS)	lysS slr1550	P73443	SYK_SYNY3	lysyl-tRNA aminoacylation [GO:0006430]	cytoplasm [GO:0005737]	ATP binding [GO:0005524];lysine-tRNA ligase activity [GO:0004824];metal ion binding [GO:0046872];nucleic acid binding [GO:0003676]	ATP binding [GO:0005524];cytoplasm [GO:0005737];lysine-tRNA ligase activity [GO:0004824];lysyl-tRNA aminoacylation [GO:0006430];metal ion binding [GO:0046872];nucleic acid binding [GO:0003676]	510	22	22	22	39.4	57.295	0	265.29	3190900000	325	1	0.182907	1.14183	0.329861	0.349056	0.964037	0.445549	0.340325	0.77257	0.463812	0.298947	1.22289	0.192166	0.358966		0.626336	0.816449	0.507392	0.789893	0.878264	0.875699	0.827335	0.751317	0.61225	1.01809	0.936066	0.855701	0.751462	1.07083	0.936268	0.99008	0.657651
RfbJ protein	rfbJ	P73444	P73444_SYNY3		integral component of membrane [GO:0016021]		integral component of membrane [GO:0016021]	318	8	8	8	22.3	35.769	0	87.447	824220000	76	1	0.422027	0.981142	0.308099	0.538916	0.981674	0.416176	0.520265	0.814967	0.393483	0.482747	0.255724	0.689981	0.192246		0.392077	0.316337	0.200987	0.230355	0.488499	0.551796	0.503563	0.436996	0.215699	0.462386	0.434547	0.522383	0.283825	0.553374	0.509337	0.57691	0.386434
Sll1456 protein	sll1456	P73445	P73445_SYNY3					302	13	13	13	53.6	33.517	0	232.22	1689100000	150	1	0.022127	0.0367789	0.96401	0.0174161	0.563111	0.642013	0.176205	0.0131534	0.989214	0.0053669	0.767961	0.381817	-0.252454		1.01432	1.21406	0.900172	0.755147	0.874801	0.953237	0.990647	0.944677	1.00702	0.880119	1.09443	1.15964	0.77093	0.998494	0.796194	1.20298	1.00458
Slr1552 protein	slr1552	P73446	P73446_SYNY3		integral component of membrane [GO:0016021]		integral component of membrane [GO:0016021]	844	3	3	3	3.4	95.955	0	25.532	266880000	16	1	-0.198753	0.248033	0.767592	0.131916	0.0790343	0.917586	-0.0608547	0.167748	0.843968	-0.0935331	1.59103	0.0549807	-1.12195		0.0781023	0.0624279	0.0538456	0.0614786	0.0575886	0.0542854	0.0552892	0.0534596	0.0402489	0.0722765	0.0447237	0.063455	0.0893909	0.0956578	0.0605048	0.0529663	0.0523268
Nitrate reductase (EC 1.7.99.4)	narB sll1454	P73448	NARB_SYNY3	denitrification pathway [GO:0019333];nitrate assimilation [GO:0042128]		4 iron, 4 sulfur cluster binding [GO:0051539];iron-sulfur cluster binding [GO:0051536];metal ion binding [GO:0046872];molybdopterin cofactor binding [GO:0043546];NADH dehydrogenase activity [GO:0003954];nitrate reductase activity [GO:0008940]	4 iron, 4 sulfur cluster binding [GO:0051539];denitrification pathway [GO:0019333];iron-sulfur cluster binding [GO:0051536];metal ion binding [GO:0046872];molybdopterin cofactor binding [GO:0043546];NADH dehydrogenase activity [GO:0003954];nitrate assimilation [GO:0042128];nitrate reductase activity [GO:0008940]	714	6	6	6	8.8	79.631	0	5.2732	586650000	21	1	-0.00773311	0.227019	0.766711	-0.163644	0.0924825	0.9083	-0.0766746	0.0654784	0.933193	0.0503069	0.181535	0.754055	-0.170314		0.181006	0.130882	0.17783	0.114914	0.0659322	0.134521	0.122525	0.170612	0.142644	0.0774694	0.147305	0.107826	0.0900563	0.100212	0.126288	0.143649	0.126586
Nitrate transport protein NrtD	nrtD	P73449	P73449_SYNY3		integral component of membrane [GO:0016021]	ATP binding [GO:0005524];ATPase activity [GO:0016887];nitrate transmembrane transporter activity [GO:0015112]	ATP binding [GO:0005524];ATPase activity [GO:0016887];integral component of membrane [GO:0016021];nitrate transmembrane transporter activity [GO:0015112]	332	13	13	13	51.2	36.564	0	286.27	3729400000	225	1	0.216627	0.913114	0.422003	0.257856	0.736258	0.509536	0.323265	0.982434	0.37871	0.370587	1.23896	0.169633	0.403426		1.05871	1.02465	0.811336	0.954441	1.30724	1.4066	1.08624	1.05496	0.994189	1.45183	1.45124	0.971091	1.13766	1.30272	1.28502	1.70446	1.32408
Nitrate transport ATP-binding protein NrtC	nrtC sll1452	P73450	NRTC_SYNY3	nitrate assimilation [GO:0042128]	plasma membrane [GO:0005886]	ATP binding [GO:0005524];ATPase activity [GO:0016887];nitrate transmembrane transporter activity [GO:0015112]	ATP binding [GO:0005524];ATPase activity [GO:0016887];nitrate assimilation [GO:0042128];nitrate transmembrane transporter activity [GO:0015112];plasma membrane [GO:0005886]	670	29	29	29	59.4	75.1	0	323.31	6027100000	430	1	0.393827	1.43081	0.242848	0.623396	1.01726	0.411911	0.496065	1.82365	0.250471	0.814267	1.67937	0.0676689	0.741046		0.602532	0.854608	0.580059	0.786015	1.35832	0.982281	0.951808	1.03533	0.837866	1.53951	1.20822	1.16949	0.977977	1.61678	1.23833	1.17439	1.21866
Nitrate transport permease protein NrtB	nrtB sll1451	P73451	NRTB_SYNY3	nitrate assimilation [GO:0042128]	integral component of membrane [GO:0016021];plasma membrane [GO:0005886]	nitrate transmembrane transporter activity [GO:0015112];transporter activity [GO:0005215]	integral component of membrane [GO:0016021];nitrate assimilation [GO:0042128];nitrate transmembrane transporter activity [GO:0015112];plasma membrane [GO:0005886];transporter activity [GO:0005215]	275	4	4	4	20	29.72	0	85.782	2440100000	18	1	-1.23403	1.01159	0.249529	-2.07918	0.599629	0.452208	-1.89489	0.580888	0.434156	-1.00743	0.424033	0.4318	-1.03421		3.57591	2.80662	3.33173	3.71672	4.12681	4.79725	0.772894	3.69479	4.66699	0.111396	3.80048	3.34586	0.43575	1.15103	0.0596842	4.18526	3.30121
Nitrate transport protein NrtA	nrtA sll1450	P73452	NRTA_SYNY3	nitrate assimilation [GO:0042128]	plasma membrane [GO:0005886]	transporter activity [GO:0005215]	nitrate assimilation [GO:0042128];plasma membrane [GO:0005886];transporter activity [GO:0005215]	446	29	29	29	55.2	48.966	0	323.31	31235000000	542	1	-0.179913	1.2901	0.411578	-0.201624	0.86534	0.664931	-0.108235	0.264938	0.784807	-0.112413	0.51987	0.700763	-0.0766543		14.3414	11.4101	12.3152	12.7235	12.1976	10.6805	10.9514	12.6845	9.26308	12.1988	9.64501	10.6389	10.1815	11.9731	12.4312	10.6532	11.826
Slr1748 protein	slr1748	P73454	P73454_SYNY3					214	4	3	3	21.5	24.167	0	7.196	29338000	13	1	0.75448	0.171083	0.784375	0.302646	0.0219151	0.971388	0.0426574	0.610779	0.434599	0.77988	0.267511	0.630771	0.359204		0.0456105		0.0203697			0.0293501	0.0285561	0.028409	0.0351554	0.0255359				0.0336774	0.0181787	0.0364615	0.036819
Cell division protein FtsZ	ftsZ sll1633	P73456	FTSZ_SYNY3	cytokinetic process [GO:0032506];protein polymerization [GO:0051258]	cell division site [GO:0032153];cytoplasm [GO:0005737]	GTP binding [GO:0005525];GTPase activity [GO:0003924];identical protein binding [GO:0042802]	cell division site [GO:0032153];cytokinetic process [GO:0032506];cytoplasm [GO:0005737];GTP binding [GO:0005525];GTPase activity [GO:0003924];identical protein binding [GO:0042802];protein polymerization [GO:0051258]	430	14	14	14	54.7	44.773	0	323.31	7858500000	331	1	-0.090753	0.0746622	0.941162	0.0286761	0.229796	0.809982	-0.108475	0.0141227	0.987108	-0.00823309	0.693023	0.410977	0.249146		5.51251	4.37061	5.45875	3.39457	4.64451	4.54855	4.12228	3.79788	4.25038	5.00188	4.47561	4.23857	4.59534	5.22788	5.02524	5.48016	3.10199
Carboxyl-terminal protease	prc	P73458	P73458_SYNY3	signal transduction [GO:0007165]	outer membrane-bounded periplasmic space [GO:0030288]	endopeptidase activity [GO:0004175];serine-type peptidase activity [GO:0008236]	endopeptidase activity [GO:0004175];outer membrane-bounded periplasmic space [GO:0030288];serine-type peptidase activity [GO:0008236];signal transduction [GO:0007165]	423	32	32	32	72.8	46.832	0	323.31	9268300000	478	1	-0.0256131	0.635029	0.749598	-0.0684039	0.493115	0.671981	-0.155295	0.107092	0.935229	0.0242269	0.482878	0.669955	-0.0931143		2.79589	2.38838	2.49091	2.66037	2.58243	2.54525	2.34314	3.10995	2.63388	2.14053	2.53061	2.25586	2.40823	2.53121	2.59079	2.48461	1.59991
Ribosomal RNA small subunit methyltransferase H (EC 2.1.1.199) (16S rRNA m(4)C1402 methyltransferase) (rRNA (cytosine-N(4)-)-methyltransferase RsmH)	rsmH mraW sll1144	P73460	RSMH_SYNY3	rRNA base methylation [GO:0070475]	cytoplasm [GO:0005737]	rRNA (cytosine-N4-)-methyltransferase activity [GO:0071424]	cytoplasm [GO:0005737];rRNA (cytosine-N4-)-methyltransferase activity [GO:0071424];rRNA base methylation [GO:0070475]	305	2	2	2	6.9	34.386	0	17.828	175560000	0	1	-0.044253	1.36539	0.30025	-0.347024	0.717751	0.432851	-0.868995	1.0625	0.305505	-0.685813	1.56217	0.0628794	-0.992854		0.142755	0.122855	0.111589	0.129438	0.102652	0.127769	0.118902	0.105975	0.131478	0.10538	0.117252	0.102088	0.0948158	0.0969931	0.0709572	0.128267	0.103952
Slr1218 protein	slr1218	P73461	P73461_SYNY3		integral component of membrane [GO:0016021]		integral component of membrane [GO:0016021]	158	3	3	3	20.3	17.678	0	30.334	128500000	25	1	0.153727	0.00568524	0.993189	0.0204153	0.138341	0.835565	-0.383755	0.649374	0.394743	1.12553	0.391276	0.46846	0.754886		0.172744	0.12817	0.11321	0.00755124	0.12801	0.153755	0.0545129	0.0406724	0.0967826	0.12511	0.164651	0.0639186		0.198571	0.164037	0.165123	0.0609383
Urease accessory protein UreE	ureE	P73462	P73462_SYNY3	enzyme active site formation [GO:0018307];protein complex assembly [GO:0006461];protein folding [GO:0006457];urea metabolic process [GO:0019627]	cytoplasm [GO:0005737]	nickel cation binding [GO:0016151];unfolded protein binding [GO:0051082]	cytoplasm [GO:0005737];enzyme active site formation [GO:0018307];nickel cation binding [GO:0016151];protein complex assembly [GO:0006461];protein folding [GO:0006457];unfolded protein binding [GO:0051082];urea metabolic process [GO:0019627]	142	4	4	4	35.9	15.867	0	12.848	153990000	58	1	0.141027	0.830086	0.493446	0.202196	0.847079	0.420019	-0.618115	0.314872	0.722667	-0.180633	0.299411	0.703802	0.120426		0.179283	0.141241	0.133265	0.118186	0.126414	0.16802	0.179051	0.156789	0.132889	0.13113	0.173991	0.174208	0.167563	0.134841	0.148362	0.186897	0.140281
Slr1220 protein	slr1220	P73463	P73463_SYNY3					317	14	14	14	47	36.009	0	183.11	5260900000	178	1	-0.0555931	0.00654765	0.993066	-0.0042439	0.348883	0.744644	0.128565	0.0411544	0.960371	0.0234069	0.725275	0.421473	-0.224154		2.90776	3.60284	2.30197	2.18121	2.91951	3.57392	3.36275	2.64468	1.92785	2.06705	3.40082	3.40931	2.15423	3.15169	1.92238	3.69588	3.15118
ATP-dependent DNA helicase (EC 3.6.4.12)	uvrD	P73465	P73465_SYNY3	DNA unwinding involved in DNA replication [GO:0006268]	cytoplasm [GO:0005737]	ATP binding [GO:0005524];ATP-dependent DNA helicase activity [GO:0004003];DNA binding [GO:0003677]	ATP binding [GO:0005524];ATP-dependent DNA helicase activity [GO:0004003];cytoplasm [GO:0005737];DNA binding [GO:0003677];DNA unwinding involved in DNA replication [GO:0006268]	793	26	26	26	42.4	90.394	0	323.31	4153500000	442	1	0.085547	0.581357	0.550213	0.231036	0.955029	0.64584	0.115005	0.653808	0.647643	0.127467	0.745113	0.50714	-0.144034		0.562026	0.687263	0.650207	0.591614	0.633066	0.672081	0.765377	0.635293	0.605959	0.638948	0.567496	0.870477	0.776023	1.03701	0.52697	0.673718	0.747214
Sll1142 protein	sll1142	P73466	P73466_SYNY3			nuclease activity [GO:0004518]	nuclease activity [GO:0004518]	173	5	5	5	32.9	19.415	0	6.3436	1633000000	21	1	0.370307	0.207514	0.765394	0.229276	0.428808	0.594938	-0.453775	0.11536	0.860736	-0.185713	0.55134	0.308774	1.51087		0.343292	0.108122	0.283314	0.127514	0.0943932	0.397495	0.204765	0.109826	0.267219	0.191229	0.32063	0.188284	0.238717	0.14177	0.137137	0.120367	0.244396
Epimerase family protein slr1223	slr1223	P73467	Y1223_SYNY3			catalytic activity [GO:0003824];coenzyme binding [GO:0050662]	catalytic activity [GO:0003824];coenzyme binding [GO:0050662]	307	13	13	13	44.3	33.193	0	220.74	3257200000	183	1	0.019827	0.872985	0.421816	-0.276464	0.442793	0.654405	-0.233795	0.424765	0.690202	-0.145253	1.78789	0.0946269	-0.459454		1.75189	1.94185	1.39733	1.67647	1.32816	1.96211	1.8262	1.6191	1.59836	1.22262	1.52793	1.58489	1.41291	1.23134	0.963725	1.31888	1.29244
Cytoplasmic membrane protein for maltose uptake	malK	P73468	P73468_SYNY3		plasma membrane [GO:0005886]	ATP binding [GO:0005524];ATPase activity [GO:0016887]	ATP binding [GO:0005524];ATPase activity [GO:0016887];plasma membrane [GO:0005886]	408	6	6	6	23.5	45.183	0	61.727	586160000	96	1	-0.136753	0.15375	0.818802	-0.192124	0.0146715	0.982838	-0.0170146	0.206263	0.785002	0.200747	0.0263331	0.958164	0.0385657		0.255751	0.235587	0.071524	0.237488	0.143292	0.198995	0.218581	0.161118	0.0687113	0.189592	0.22127	0.177388	0.060111	0.192994	0.165487	0.257121	0.153509
Serine/threonine-protein kinase F (EC 2.7.11.1)	spkF slr1225	P73469	SPKF_SYNY3			ATP binding [GO:0005524];protein serine/threonine kinase activity [GO:0004674]	ATP binding [GO:0005524];protein serine/threonine kinase activity [GO:0004674]	495	5	5	5	15.2	53.872	0	23.742	206930000	23	1	0.043447	0.647782	0.522276	-0.231144	0.202351	0.836027	-0.0974546	0.335953	0.704957	-0.189933	0.65981	0.36749	-0.354634		0.0900899	0.0925024	0.0709611	0.0838659	0.0619062	0.103085	0.100345	0.0682794	0.0668371	0.0756074	0.0694627	0.0681935	0.0477741	0.0709933	0.0857745	0.0656581	0.106343
Phosphoribosylaminoimidazole-succinocarboxamide synthase (EC 6.3.2.6) (SAICAR synthetase)	purC slr1226	P73471	PUR7_SYNY3	cobalamin biosynthetic process [GO:0009236];'de novo' IMP biosynthetic process [GO:0006189]		ATP binding [GO:0005524];phosphoribosylaminoimidazolesuccinocarboxamide synthase activity [GO:0004639]	ATP binding [GO:0005524];cobalamin biosynthetic process [GO:0009236];'de novo' IMP biosynthetic process [GO:0006189];phosphoribosylaminoimidazolesuccinocarboxamide synthase activity [GO:0004639]	264	10	10	10	36.4	29.737	0	193.04	4844600000	199	1	0.322207	0.598003	0.493784	0.321016	1.52665	0.402976	0.569565	1.0382	0.361561	0.406127	0.790582	0.201942	0.973886		1.64925	1.04814	1.16076	0.798812	1.13361	1.43605	1.18267	1.08342	1.84688	1.63328	1.3612	1.24961	0.909075	1.86171	1.92012	1.78536	2.14413
Chloroplast import-associated channel IAP75	IAP75	P73472	P73472_SYNY3	intracellular protein transport [GO:0006886]	intracellular [GO:0005622];outer membrane [GO:0019867]	P-P-bond-hydrolysis-driven protein transmembrane transporter activity [GO:0015450]	intracellular [GO:0005622];intracellular protein transport [GO:0006886];outer membrane [GO:0019867];P-P-bond-hydrolysis-driven protein transmembrane transporter activity [GO:0015450]	861	18	18	18	27.3	92.306	0	323.31	1597100000	257	1	0.0841669	0.343165	0.636948	0.320776	0.443698	0.587559	0.467725	0.89462	0.340178	0.729087	0.650059	0.317118	0.536866		0.176557	0.126169	0.524521	0.356217	0.352044	0.191804	0.289461	0.365639	0.188024	0.513904	0.292434	0.246897	0.343164	0.379067	0.474208	0.26256	0.365411
Peptide chain release factor 3 (RF-3)	prfC slr1228	P73473	RF3_SYNY3	translational termination [GO:0006415]	cytosol [GO:0005829]	GTP binding [GO:0005525];GTPase activity [GO:0003924];translation release factor activity, codon nonspecific [GO:0016150]	cytosol [GO:0005829];GTP binding [GO:0005525];GTPase activity [GO:0003924];translation release factor activity, codon nonspecific [GO:0016150];translational termination [GO:0006415]	547	15	15	15	37.8	61.189	0	145.92	2745700000	176	1	0.019507	1.10881	0.252337	0.923356	0.153323	0.832777	0.240085	0.175346	0.795759	0.304407	1.30375	0.08075	1.12017		0.575948	0.646729	0.460181	0.141192	0.824406	0.909287	0.730949	0.23274	0.146157	0.944204	0.888462	0.82747	0.680078	0.938238	1.04355	1.16209	0.81926
Universal stress protein Slr1230 (USP Slr1230)	slr1230	P73475	Y1230_SYNY3	response to stress [GO:0006950]			response to stress [GO:0006950]	287	4	4	4	11.8	31.234	0.0090589	1.4446	79966000	18	1	0.227013	0.0721817	0.919422	0.138138	0.0616062	0.926867	0.0848386	0.159837	0.811343	-0.232578	0.304742	0.570353	0.519828		0.011577		0.0286062	0.040183	0.0419039			0.032316	0.0328217	0.0375556	0.00767713	0.0154011	0.0615914	0.0329387	0.0639546		0.0248002
Succinate dehydrogenase flavoprotein subunit	frdA	P73479	P73479_SYNY3	anaerobic respiration [GO:0009061]		electron transfer activity [GO:0009055];flavin adenine dinucleotide binding [GO:0050660];oxidoreductase activity [GO:0016491];oxidoreductase activity, acting on the CH-CH group of donors [GO:0016627]	anaerobic respiration [GO:0009061];electron transfer activity [GO:0009055];flavin adenine dinucleotide binding [GO:0050660];oxidoreductase activity [GO:0016491];oxidoreductase activity, acting on the CH-CH group of donors [GO:0016627]	575	15	15	15	30.4	63.701	0	323.31	1773800000	164	1	-0.534553	1.82367	0.2022	-0.794164	1.45728	0.411032	-0.763515	1.09623	0.314899	-0.576133	1.21861	0.138279	-0.563554		0.709566	0.713722	0.831375	0.686784	0.322647	0.430178	0.521248	0.419602	0.38507	0.403844	0.391988	0.361152	0.380237	0.282559	0.391204	0.350799	0.397023
Uncharacterized HIT-like protein slr1234	slr1234	P73481	YHIT_SYNY3			catalytic activity [GO:0003824]	catalytic activity [GO:0003824]	114	4	4	4	41.2	12.456	0	20.51	498260000	36	1	0.859527	0.800319	0.307814	1.23528	0.914066	0.382378	1.31899	0.443383	0.541851	0.676947	0.353432	0.511542	0.629466		0.10192	0.558889	0.060634	0.52691	0.2678	0.102686	0.57704	0.513485	0.515481	0.611096	0.14642	0.999569	0.656002	0.625129	0.587269	0.197157	1.02242
Slr1235 protein	slr1235	P73482	P73482_SYNY3			hydrolase activity [GO:0016787]	hydrolase activity [GO:0016787]	293	3	3	3	18.4	32.776	0	11.513	122370000	17	1	0.336827	1.20286	0.248637	0.844816	0.445866	0.566917	0.617037	0.183625	0.793739	0.266983	0.460394	0.44216	-0.528234		0.0368858	0.062255	0.0286241	0.0181163	0.0763159	0.0570356	0.0666128	0.0822576	0.0185478	0.0503792	0.0576907	0.0815924	0.0594315	0.0802601	0.07564	0.109927	0.0779771
Sll1130 protein	sll1130	P73488	P73488_SYNY3		plasma membrane-derived thylakoid photosystem II [GO:0030096]	DNA binding [GO:0003677]	DNA binding [GO:0003677];plasma membrane-derived thylakoid photosystem II [GO:0030096]	115	16	16	16	100	12.933	0	323.31	75401000000	419	1	-0.221833	0.62019	0.503685	-0.279544	0.37234	0.706883	-0.165794	0.764162	0.474466	-0.287253	1.84673	0.0812332	-0.491454		61.8289	92.7088	88.5593	82.2035	85.5696	99.9342	51.2345	64.9741	91.2778	54.5108	93.6354	89.5536	60.3078	57.6211	46.5075	78.1307	48.8062
Probable glutaredoxin ssr2061	ssr2061	P73492	GLRX2_SYNY3	cell redox homeostasis [GO:0045454]	cell [GO:0005623]	electron transfer activity [GO:0009055];protein disulfide oxidoreductase activity [GO:0015035]	cell [GO:0005623];cell redox homeostasis [GO:0045454];electron transfer activity [GO:0009055];protein disulfide oxidoreductase activity [GO:0015035]	88	6	6	6	73.9	9.7351	0	59.351	246840000	46	1	0.350907	0.447697	0.516113	0.665936	0.367065	0.629709	0.584685	0.0741699	0.912232	0.120787	0.200038	0.721454	0.268906		0.511395	0.532936	0.325442	0.0866011	0.239389	0.504458	0.858769	0.508596	0.085454	0.329528	0.445774	0.658967	0.142296	1.08442	0.407845	0.462722	0.615058
Glutathione synthetase (EC 6.3.2.3) (GSH synthetase) (GSH-S) (GSHase) (Glutathione synthase)	gshB slr1238	P73493	GSHB_SYNY3		cytoplasm [GO:0005737];cytosol [GO:0005829]	ATP binding [GO:0005524];glutathione synthase activity [GO:0004363];metal ion binding [GO:0046872]	ATP binding [GO:0005524];cytoplasm [GO:0005737];cytosol [GO:0005829];glutathione synthase activity [GO:0004363];metal ion binding [GO:0046872]	320	9	9	9	27.8	35.068	0	201.51	2592600000	123	1	-0.285473	0.893778	0.57366	-0.133104	0.552335	0.66436	-0.158015	0.647908	0.649891	-0.125313	0.107016	0.896893	-0.0335543		1.28424	1.08195	1.01944	1.20191	1.12438	0.989936	1.00838	0.956604	1.05679	0.705281	1.02376	1.07391	0.909517	1.07075	1.12716	1.07603	0.900372
1,4-dihydroxy-2-naphthoyl-CoA synthase (DHNA-CoA synthase) (EC 4.1.3.36)	menB	P73495	P73495_SYNY3	menaquinone biosynthetic process [GO:0009234];phylloquinone biosynthetic process [GO:0042372]		1,4-dihydroxy-2-naphthoyl-CoA synthase activity [GO:0008935]	1,4-dihydroxy-2-naphthoyl-CoA synthase activity [GO:0008935];menaquinone biosynthetic process [GO:0009234];phylloquinone biosynthetic process [GO:0042372]	275	8	8	8	34.5	30.307	0	161.59	1650900000	125	1	-0.204013	2.13352	0.225263	-0.395344	0.482503	0.706072	-0.121695	0.590547	0.644466	-0.141733	1.02148	0.407412	-0.171154		1.11204	1.03594	0.938073	1.17554	0.983725	1.0289	0.806498	0.841184	1.00919	0.874767	0.973453	0.67258	0.798947	0.850289	0.71385	1.0375	0.774369
Pyridine nucleotide transhydrogenase alpha subunit	pntA	P73496	P73496_SYNY3	NADPH regeneration [GO:0006740];proton transport [GO:0015992]	integral component of membrane [GO:0016021];plasma membrane [GO:0005886]	NAD binding [GO:0051287];NAD(P)+ transhydrogenase (AB-specific) activity [GO:0008750];NADP binding [GO:0050661]	integral component of membrane [GO:0016021];NAD binding [GO:0051287];NAD(P)+ transhydrogenase (AB-specific) activity [GO:0008750];NADP binding [GO:0050661];NADPH regeneration [GO:0006740];plasma membrane [GO:0005886];proton transport [GO:0015992]	530	17	17	17	46.8	56.049	0	199.81	2706200000	230	1	0.399887	1.48879	0.247948	0.508656	1.10869	0.412384	0.437605	1.67629	0.248405	0.581667	0.977621	0.278675	0.299106		0.458442	0.438283	0.487601	0.465008	0.767387	0.744172	0.664317	0.672867	0.704754	0.596284	0.844391	0.876654	0.765711	0.672649	0.534511	0.949617	0.690299
Slr1240 protein	slr1240	P73497	P73497_SYNY3					179	2	2	2	17.9	21.06	0	11.907	448990000	10	1	0.170047	1.39593	0.330561	0.275196	0.511489	0.664299	0.164745	1.21257	0.376698	0.284707	0.6276	0.517033	0.157066		0.342793	0.253601	0.374146	0.280064	0.349612	0.358391	0.308586	0.362209	0.426374	0.336149	0.365763	0.398011	0.411787	0.384839	0.358288	0.362642	0.337204
NAD(P) transhydrogenase subunit beta (EC 1.6.1.2) (Nicotinamide nucleotide transhydrogenase subunit beta)	pntB	P73500	P73500_SYNY3		integral component of membrane [GO:0016021];plasma membrane [GO:0005886]	NAD(P)+ transhydrogenase (AB-specific) activity [GO:0008750];NADP binding [GO:0050661]	integral component of membrane [GO:0016021];NAD(P)+ transhydrogenase (AB-specific) activity [GO:0008750];NADP binding [GO:0050661];plasma membrane [GO:0005886]	480	5	5	5	15	49.943	0	57.771	773520000	21	1	0.360647	0.398455	0.586457	0.390196	0.112802	0.875922	0.138525	0.256796	0.730082	0.286867	0.188075	0.74043	-0.232554		0.978884	0.196083	0.773821	0.67321	0.842487	0.536968	0.783358	0.855295	0.949995	0.860216	1.09724	0.848907	0.702549	0.649646	0.766147	0.835156	0.397932
PmbA protein	pmbA	P73501	P73501_SYNY3			metallopeptidase activity [GO:0008237]	metallopeptidase activity [GO:0008237]	427	9	9	9	36.5	46.378	0	169.8	725820000	136	1	-0.163453	0.110184	0.905065	0.0663761	0.541367	0.608848	-0.231275	0.192358	0.821931	0.104267	0.247692	0.740991	0.111946		0.266833	0.258697	0.317488	0.156901	0.266264	0.246611	0.244235	0.168158	0.211084	0.243041	0.288388	0.198413	0.21095	0.340382	0.280484	0.257459	0.183556
Slr1437 protein	slr1437	P73503	P73503_SYNY3					112	3	3	3	47.3	12.671	0	43.809	781880000	68	1	-0.109793	0.716955	0.451627	-0.295664	0.744002	0.496432	-0.351515	0.739723	0.429862	-0.436353	1.69237	0.0598667	-0.846034		1.66268	1.6573	2.11795	1.75215	1.59585	1.27589	1.76717	2.03241	2.148	1.13318	1.19465	2.08302	1.79885	1.31024	0.99861	0.760762	1.83121
Slr1438 protein	slr1438	P73504	P73504_SYNY3	carbohydrate metabolic process [GO:0005975]		carbohydrate binding [GO:0030246];isomerase activity [GO:0016853]	carbohydrate binding [GO:0030246];carbohydrate metabolic process [GO:0005975];isomerase activity [GO:0016853]	289	7	7	7	30.8	33.029	0	49.716	720430000	68	1	-0.227393	0.912073	0.321299	-0.569384	0.704535	0.476766	-0.460815	0.747394	0.401083	-0.537893	1.635	0.0504839	-1.13967		0.593372	0.397667	0.537103	0.441728	0.260098	0.37548	0.433392	0.475657	0.530562	0.161228	0.348102	0.377979	0.424981	0.213606	0.169445	0.238361	0.222904
Isoleucine--tRNA ligase (EC 6.1.1.5) (Isoleucyl-tRNA synthetase) (IleRS)	ileS sll1362	P73505	SYI_SYNY3	isoleucyl-tRNA aminoacylation [GO:0006428]	cytoplasm [GO:0005737]	aminoacyl-tRNA editing activity [GO:0002161];ATP binding [GO:0005524];isoleucine-tRNA ligase activity [GO:0004822];metal ion binding [GO:0046872];tRNA binding [GO:0000049]	aminoacyl-tRNA editing activity [GO:0002161];ATP binding [GO:0005524];cytoplasm [GO:0005737];isoleucine-tRNA ligase activity [GO:0004822];isoleucyl-tRNA aminoacylation [GO:0006428];metal ion binding [GO:0046872];tRNA binding [GO:0000049]	988	37	37	37	52.5	112.34	0	323.31	8798300000	471	1	0.00700695	0.0570585	0.961365	0.0167561	0.142959	0.911435	0.0340254	0.282707	0.813084	-0.0739731	0.174762	0.847659	0.0461457		1.31149	1.33231	1.22567	1.48981	1.61264	1.57867	1.25036	1.52996	1.63977	1.06457	1.54123	1.51895	1.28857	1.52449	1.18574	1.38753	1.28797
Sll1358 protein	sll1358	P73510	P73510_SYNY3	oxalate metabolic process [GO:0033609]	outer membrane-bounded periplasmic space [GO:0030288]	metal ion binding [GO:0046872];nutrient reservoir activity [GO:0045735]	metal ion binding [GO:0046872];nutrient reservoir activity [GO:0045735];outer membrane-bounded periplasmic space [GO:0030288];oxalate metabolic process [GO:0033609]	394	5	5	5	19	43.15	0	54.973	497410000	58	1	-0.454593	0.665753	0.368234	-0.957624	0.561483	0.554047	-0.350875	0.982282	0.305734	-0.874473	1.17356	0.088062	-1.56023		0.165306	0.241507	0.407924	0.380068	0.25682	0.275994	0.212163	0.238605	0.370076	0.0636088	0.248994	0.342002	0.322433	0.0418922	0.0500181	0.171469	0.174584
Glycogen phosphorylase (EC 2.4.1.1)	glgP sll1356	P73511	PHSG_SYNY3	glycogen catabolic process [GO:0005980]	cytoplasm [GO:0005737]	glycogen phosphorylase activity [GO:0008184];linear malto-oligosaccharide phosphorylase activity [GO:0102250];pyridoxal phosphate binding [GO:0030170];SHG alpha-glucan phosphorylase activity [GO:0102499]	cytoplasm [GO:0005737];glycogen catabolic process [GO:0005980];glycogen phosphorylase activity [GO:0008184];linear malto-oligosaccharide phosphorylase activity [GO:0102250];pyridoxal phosphate binding [GO:0030170];SHG alpha-glucan phosphorylase activity [GO:0102499]	849	24	24	24	29.1	96.648	0	243.67	3640500000	315	1	-0.224013	1.17509	0.268013	-0.583404	0.777493	0.450563	-0.500755	0.970038	0.340614	-0.598533	1.75194	0.0600291	-0.769794		0.935176	0.890035	0.773446	0.764733	0.411461	0.703346	0.777839	0.804962	0.737642	0.28689	0.535435	0.605282	0.626363	0.351483	0.375893	0.478907	0.453852
Slr1444 protein	slr1444	P73516	P73516_SYNY3					333	6	6	6	26.1	38.669	0	70.652	260430000	26	1	-0.0608729	0.51929	0.447261	-0.845064	0.338046	0.666443	-0.397695	0.0482067	0.94733	-0.0534131	1.38129	0.0711754	1.18971		0.130074	0.0964707	0.119764	0.0935725	0.0501859	0.0685171	0.0745134	0.106269	0.0681422	0.154585	0.0142834	0.0557834	0.0438728	0.0345021	0.312839	0.0344636	0.0886211
6,7-dimethyl-8-ribityllumazine synthase (DMRL synthase) (LS) (Lumazine synthase) (EC 2.5.1.78)	ribH sll1282	P73527	RISB_SYNY3	riboflavin biosynthetic process [GO:0009231]	cytosol [GO:0005829];riboflavin synthase complex [GO:0009349]	6,7-dimethyl-8-ribityllumazine synthase activity [GO:0000906];transferase activity [GO:0016740]	6,7-dimethyl-8-ribityllumazine synthase activity [GO:0000906];cytosol [GO:0005829];riboflavin biosynthetic process [GO:0009231];riboflavin synthase complex [GO:0009349];transferase activity [GO:0016740]	164	9	9	9	73.8	17.617	0	165.07	3116300000	134	1	-0.096693	0.402537	0.72419	-0.109324	0.377016	0.749871	0.108425	0.405917	0.718138	-0.127433	1.08115	0.272707	-0.273114		2.04686	2.97159	2.34644	2.40999	2.27667	2.43194	2.4704	2.03537	2.11461	2.16606	2.26637	2.69742	2.11928	2.20248	1.87878	2.44294	2.45325
Sll1280 protein	sll1280	P73529	P73529_SYNY3	CAAX-box protein processing [GO:0071586]		metalloendopeptidase activity [GO:0004222]	CAAX-box protein processing [GO:0071586];metalloendopeptidase activity [GO:0004222]	303	5	5	5	23.4	34.01	0	20.68	352460000	57	1	0.0134269	0.304981	0.675967	0.298296	0.166748	0.823437	0.201825	0.697228	0.415879	0.592287	0.299203	0.609239	0.303466		0.152545	0.0456935	0.165806	0.174806	0.218185	0.107433	0.115843	0.200586	0.135109	0.136917	0.185332	0.146856	0.129119	0.211441	0.1668	0.0944318	0.249341
30S ribosomal protein S1 homolog A	rps1A slr1356	P73530	RS1A_SYNY3		ribosome [GO:0005840]	RNA binding [GO:0003723]	ribosome [GO:0005840];RNA binding [GO:0003723]	328	27	27	27	65.2	36.57	0	323.31	45523000000	645	1	0.178887	0.873393	0.41667	0.290096	0.972192	0.450731	0.307065	1.15058	0.359145	0.350487	0.912898	0.336128	0.251806		15.7547	17.7671	17.3261	15.9461	26.6198	24.2953	18.6945	19.2168	20.5646	21.3205	22.1584	21.3947	20.1495	29.5918	19.9041	28.042	22.5178
ABC transporter	sll1276	P73533	P73533_SYNY3		integral component of membrane [GO:0016021]	ATP binding [GO:0005524];ATPase activity, coupled to transmembrane movement of substances [GO:0042626]	ATP binding [GO:0005524];ATPase activity, coupled to transmembrane movement of substances [GO:0042626];integral component of membrane [GO:0016021]	534	7	7	7	16.9	59.009	0	49.565	264680000	68	1	1.11999	0.666981	0.359601	1.28796	0.721701	0.422369	1.40385	0.703783	0.366962	1.40205	0.663857	0.248452	1.21263		0.02014	0.0898794	0.00297576	0.0430193	0.0622418	0.060476	0.0525685	0.0736635	0.0367425	0.0812984	0.0576068	0.103599	0.0247569	0.113403	0.074728	0.120226	0.120901
Pyruvate kinase 2 (PK 2) (EC 2.7.1.40)	pyk2 sll1275	P73534	KPYK2_SYNY3	glycolytic process [GO:0006096]	cytosol [GO:0005829]	ATP binding [GO:0005524];kinase activity [GO:0016301];magnesium ion binding [GO:0000287];potassium ion binding [GO:0030955];pyruvate kinase activity [GO:0004743]	ATP binding [GO:0005524];cytosol [GO:0005829];glycolytic process [GO:0006096];kinase activity [GO:0016301];magnesium ion binding [GO:0000287];potassium ion binding [GO:0030955];pyruvate kinase activity [GO:0004743]	591	31	31	31	61.4	62.985	0	323.31	18942000000	626	1	0.055487	0.930895	0.568883	0.132616	0.994446	0.577255	0.149005	1.50222	0.44351	0.174927	1.24615	0.376048	0.167386		3.98343	3.27532	3.74683	3.2828	3.69002	3.44358	3.7003	3.31749	4.33819	3.9138	3.53371	3.82081	4.1496	4.33588	3.85998	4.07448	3.41786
Slr1362 protein	slr1362	P73535	P73535_SYNY3					133	3	3	3	24.1	14.794	0	11.868	304480000	23	1	0.133007	0.252848	0.721792	0.279156	0.955307	0.412489	0.588045	0.0234796	0.973729	-0.0245131	0.576904	0.354396	-0.570314		0.361586	0.440873	0.2	0.20041	0.475734	0.396476	0.463051	0.460283	0.270461	0.210891	0.467482	0.48129	0.257113	0.766377	0.180415	0.530203	0.706369
Slr1363 protein	slr1363	P73537	P73537_SYNY3	polyphosphate metabolic process [GO:0006797]		polyphosphate:AMP phosphotransferase activity [GO:0043751]	polyphosphate metabolic process [GO:0006797];polyphosphate:AMP phosphotransferase activity [GO:0043751]	500	16	16	16	36.8	58.901	0	91.571	2241200000	166	1	0.0336269	0.676717	0.501227	-0.250124	0.371104	0.712675	-0.154415	0.0139529	0.987463	-0.00863308	0.275667	0.703417	-0.138154		0.800798	0.469089	0.780338	0.677893	0.469184	0.715293	0.605434	0.662317	0.731177	0.499505	0.548735	0.606668	0.494476	0.514102	0.463003	0.477416	0.564128
Biotin synthase (EC 2.8.1.6)	bioB slr1364	P73538	BIOB_SYNY3	biotin biosynthetic process [GO:0009102]		2 iron, 2 sulfur cluster binding [GO:0051537];4 iron, 4 sulfur cluster binding [GO:0051539];biotin synthase activity [GO:0004076];metal ion binding [GO:0046872]	2 iron, 2 sulfur cluster binding [GO:0051537];4 iron, 4 sulfur cluster binding [GO:0051539];biotin biosynthetic process [GO:0009102];biotin synthase activity [GO:0004076];metal ion binding [GO:0046872]	362	9	9	9	40.1	39.349	0	115.39	1084300000	157	1	0.293247	1.13949	0.290423	0.485576	0.414723	0.638591	0.309465	0.955248	0.343923	0.572747	0.942376	0.199339	0.547846		0.175557	0.248279	0.191216	0.228241	0.382976	0.287295	0.246548	0.283495	0.212082	0.472659	0.335453	0.2682	0.270851	0.413347	0.389202	0.454237	0.348781
Sll1273 protein	sll1273	P73541	P73541_SYNY3					474	12	12	12	33.1	53.975	0	108.66	1528500000	210	1	0.114987	0.406651	0.679372	0.150956	0.256563	0.792426	0.122285	1.01319	0.393002	0.314227	0.829052	0.30655	0.331326		0.509626	0.375669	0.425453	0.304229	0.352044	0.409719	0.588675	0.46265	0.268202	0.434212	0.356132	0.361378	0.461138	0.485696	0.51068	0.44102	0.558951
Sll1272 protein	sll1272	P73542	P73542_SYNY3					256	7	7	7	37.1	29.008	0	5.6982	153870000	16	1	-0.051985	0.333696	0.617433	0.572184	0.72984	0.431888	0.824773	0.00683048	0.990987	0.0126749	0.0675896	0.892506	0.114194			0.134012	0.0937181	0.0533832	0.0174036	0.0417873	0.084298	0.0390643	0.069801	0.0332817	0.181959	0.125754	0.0458915	0.107583	0.0246152	0.121676	0.1248
Glutamine-binding periplasmic protein/glutamine transport system permease protein	glnH glnP	P73544	P73544_SYNY3		ATP-binding cassette (ABC) transporter complex [GO:0043190];plasma membrane [GO:0005886]	amino acid transmembrane transporter activity [GO:0015171];ionotropic glutamate receptor activity [GO:0004970]	amino acid transmembrane transporter activity [GO:0015171];ATP-binding cassette (ABC) transporter complex [GO:0043190];ionotropic glutamate receptor activity [GO:0004970];plasma membrane [GO:0005886]	530	11	11	11	28.3	57.68	0	86.507	1394300000	126	1	-0.00737301	0.0675269	0.923689	0.0910762	0.159132	0.835082	0.187725	0.185137	0.812592	-0.138953	2.25739	0.0250989	-1.46601	+	0.499068	0.695506	0.327842	0.386926	0.454681	0.923195	0.810814	0.517343	0.327597	0.153826	0.749907	0.831667	0.47664	0.622578	0.148321	0.523049	0.542537
Alpha-1,4 glucan phosphorylase (EC 2.4.1.1)	glgP	P73546	P73546_SYNY3	carbohydrate metabolic process [GO:0005975]		glycogen phosphorylase activity [GO:0008184];linear malto-oligosaccharide phosphorylase activity [GO:0102250];pyridoxal phosphate binding [GO:0030170];SHG alpha-glucan phosphorylase activity [GO:0102499]	carbohydrate metabolic process [GO:0005975];glycogen phosphorylase activity [GO:0008184];linear malto-oligosaccharide phosphorylase activity [GO:0102250];pyridoxal phosphate binding [GO:0030170];SHG alpha-glucan phosphorylase activity [GO:0102499]	855	60	60	60	71.1	98.304	0	323.31	31897000000	1065	1	0.530907	2.18711	0.203286	1.00734	1.28981	0.402965	0.743325	2.32906	0.316333	1.11797	3.12937	0.0264762	1.38839	+	1.90212	2.01885	2.01862	2.11789	4.47605	3.18746	2.96502	3.07395	2.89245	5.50625	4.15884	3.69988	4.85938	4.7051	6.85612	4.58435	4.33759
Precorrin decarbocylase	cbiT	P73547	P73547_SYNY3	cobalamin biosynthetic process [GO:0009236]		protein methyltransferase activity [GO:0008276]	cobalamin biosynthetic process [GO:0009236];protein methyltransferase activity [GO:0008276]	227	6	6	6	30.8	24.777	0	75.082	460170000	32	1	0.511427	0.639775	0.39464	0.735496	1.08061	0.392829	0.959845	0.261222	0.713662	0.357607	0.295652	0.589814	0.439646		0.177983	0.293643	0.0597289	0.0912475	0.235341	0.283773	0.273563	0.20439	0.0755509	0.329117	0.276736	0.351252	0.0895397	0.291108	0.338515	0.346066	0.38826
Sll1265 protein	sll1265	P73551	P73551_SYNY3					1978	3	3	3	2.2	213.76	0.0041173	1.7816	197090000	10	1	0.20959	0.39142	0.564065	-0.611845	0.372893	0.62447	0.59807	0.182558	0.795991	0.258561	0.602722	0.317383	0.713613			0.012537	0.0354609	0.0211313			0.0116611	0.0170533	0.0192192	0.024207		0.0194846		0.010958	0.0198639		0.0114938
Sll0877 protein	sll0877	P73552	P73552_SYNY3					456	7	7	7	25	51.885	0	37.465	533360000	55	1	0.0204669	0.0401868	0.959952	-0.0408039	0.539587	0.559569	0.355025	0.0319435	0.962331	0.033607	0.119838	0.831533	0.113386		0.0892199	0.234919	0.0816033	0.176768	0.147065	0.170519	0.147598	0.113094	0.12913	0.129864	0.141736	0.201029	0.0979149	0.0930614	0.148671	0.194807	0.162014
Large-conductance mechanosensitive channel	mscL slr0875	P73553	MSCL_SYNY3	cellular water homeostasis [GO:0009992];ion transport [GO:0006811]	integral component of membrane [GO:0016021];plasma membrane [GO:0005886]	mechanosensitive ion channel activity [GO:0008381]	cellular water homeostasis [GO:0009992];integral component of membrane [GO:0016021];ion transport [GO:0006811];mechanosensitive ion channel activity [GO:0008381];plasma membrane [GO:0005886]	145	5	5	5	35.2	15.805	0	87.658	1523600000	50	1	1.19899	0.0671133	0.921153	0.162916	0.460442	0.547818	0.873265	0.45771	0.520283	0.806247	0.423224	0.446519	0.772326		5.89017	3.9505	0.444998	4.11225	0.794725	3.99753	5.96509	4.11843	4.86282	4.51921	4.51111	3.39398	0.782722	1.49591	3.32002	5.45968	6.42454
Slr0876 protein	slr0876	P73556	P73556_SYNY3			oxidoreductase activity [GO:0016491]	oxidoreductase activity [GO:0016491]	409	17	17	17	51.6	45.252	0	311.41	4996500000	357	1	0.183587	1.93948	0.256263	0.369756	0.442412	0.674489	0.176885	2.00604	0.26195	0.373427	1.64724	0.164278	0.299846		0.996754	1.08023	1.02596	1.00044	1.41434	1.4567	1.202	1.10557	0.972582	1.56859	1.39067	1.33309	1.29179	1.65431	1.42108	1.39951	1.40493
RNA-binding protein	ssr1480	P73557	P73557_SYNY3			RNA binding [GO:0003723]	RNA binding [GO:0003723]	83	7	7	3	80.7	9.3904	0	323.31	18705000000	219	1	0.062727	0.226792	0.785357	0.118736	0.051214	0.9479	0.0283453	0.741641	0.466569	0.315127	1.01112	0.239393	0.359366		29.7643	21.208	34.071	26.3043	41.5918	29.965	24.1231	25.7392	42.7986	36.7245	33.8734	22.4817	38.425	36.025	33.684	31.5401	23.9457
Glutamyl-tRNA(Gln) amidotransferase subunit A (Glu-ADT subunit A) (EC 6.3.5.7)	gatA slr0877	P73558	GATA_SYNY3	translation [GO:0006412]	glutamyl-tRNA(Gln) amidotransferase complex [GO:0030956]	amidase activity [GO:0004040];ATP binding [GO:0005524];glutaminyl-tRNA synthase (glutamine-hydrolyzing) activity [GO:0050567]	amidase activity [GO:0004040];ATP binding [GO:0005524];glutaminyl-tRNA synthase (glutamine-hydrolyzing) activity [GO:0050567];glutamyl-tRNA(Gln) amidotransferase complex [GO:0030956];translation [GO:0006412]	483	26	26	26	81.4	51.47	0	323.31	10267000000	539	1	0.015887	0.251826	0.791158	0.0962361	0.781829	0.552668	0.210465	0.263348	0.809842	0.0819869	0.420375	0.64477	-0.119814		2.48907	4.06381	2.94746	3.22708	3.60257	3.21163	3.73742	3.70043	2.7162	3.03558	3.32092	4.18747	2.81254	3.87052	3.19606	4.00005	3.59027
Carboxynorspermidine decarboxylase	napC	P73562	P73562_SYNY3	nor-spermidine biosynthetic process [GO:0045312]		carboxy-lyase activity [GO:0016831]	carboxy-lyase activity [GO:0016831];nor-spermidine biosynthetic process [GO:0045312]	387	10	10	10	45	43.231	0	117.65	1239200000	115	1	0.242187	0.541443	0.528833	0.299656	0.341142	0.687218	0.246945	0.885796	0.384369	0.429427	1.25059	0.141211	0.510286		0.307511	0.350342	0.454128	0.417465	0.734598	0.575189	0.315988	0.480595	0.615867	0.645626	0.460822	0.429991	0.454853	0.681472	0.690107	0.47768	0.28827
Slr0882 protein	slr0882	P73566	P73566_SYNY3		integral component of membrane [GO:0016021]		integral component of membrane [GO:0016021]	394	6	6	6	16	44.441	0	31.53	1014700000	67	1	-0.080873	0.172231	0.837119	-0.100624	0.228129	0.80148	-0.122955	0.226808	0.796465	-0.127133	1.09254	0.18818	-0.436574		0.703591	0.467888	0.438142	0.429321	0.328993	0.438275	0.506538	0.459072	0.493558	0.306014	0.469626	0.484033	0.412902	0.521351	0.293757	0.4516	0.44138
Regulation of penicillin binding protein 5 production	psr	P73567	P73567_SYNY3		integral component of membrane [GO:0016021]		integral component of membrane [GO:0016021]	481	3	3	3	8.3	53.11	0	18.71	101070000	32	1	0.623127	1.582	0.221051	0.709336	0.49347	0.544493	0.637995	1.80746	0.2963	1.09471	2.962	0.0223226	1.38361	+	0.0192848	0.0107236	0.0148919	0.0113374	0.0178941	0.0446439	0.0136831	0.0195945	0.0184299	0.0245484	0.0177257	0.030334	0.0227368	0.0174579	0.0342084	0.0473339	0.0178565
Sll0867 protein	sll0867	P73573	P73573_SYNY3			oxidoreductase activity [GO:0016491]	oxidoreductase activity [GO:0016491]	430	4	4	4	11.9	48.969	0	6.4333	149620000	12	1	0.363627	0.0932736	0.899983	0.141796	0.457216	0.561698	0.606365	0.0737456	0.912455	0.121667	0.830733	0.212255	0.697286		0.048935	0.0705962	0.0134819	0.0318896	0.0260879	0.0636016	0.0675146	0.0163178	0.0404895	0.0481597	0.0396862	0.0478903	0.0129588	0.0603303	0.0426265	0.111779	0.0327218
3-oxoacyl-[acyl-carrier-protein] reductase (EC 1.1.1.100) (3-ketoacyl-acyl carrier protein reductase)	fabG slr0886	P73574	FABG_SYNY3	fatty acid biosynthetic process [GO:0006633]		3-oxoacyl-[acyl-carrier-protein] reductase (NADPH) activity [GO:0004316];3-oxo-glutaryl-[acp] methyl ester reductase activity [GO:0102131];3-oxo-pimeloyl-[acp] methyl ester reductase activity [GO:0102132];NAD binding [GO:0051287]	3-oxoacyl-[acyl-carrier-protein] reductase (NADPH) activity [GO:0004316];3-oxo-glutaryl-[acp] methyl ester reductase activity [GO:0102131];3-oxo-pimeloyl-[acp] methyl ester reductase activity [GO:0102132];fatty acid biosynthetic process [GO:0006633];NAD binding [GO:0051287]	247	10	10	10	62.3	25.723	0	323.31	12328000000	251	1	-0.228873	1.3312	0.325469	-0.296324	0.803827	0.557866	-0.196155	0.904432	0.518876	-0.184893	1.98829	0.101531	-0.375134		13.1056	12.3115	14.8941	14.9278	11.2225	11.9431	10.6889	10.5443	13.0537	10.3652	12.9464	10.9669	11.6461	10.0458	8.67878	12.1427	10.7376
Uncharacterized protein slr0889	slr0889	P73577	Y889_SYNY3			ATP binding [GO:0005524];protein kinase activity [GO:0004672]	ATP binding [GO:0005524];protein kinase activity [GO:0004672]	408	2	2	2	4.2	45.957	0.00055804	3.2455	704490000	46	1	-0.287933	0.203555	0.748375	-0.421644	0.188612	0.78825	-0.353895	0.483077	0.500545	-0.802893	0.114615	0.81845	-0.197594		0.581967	0.0477133	0.408631	0.337469	0.196694	0.458409	0.046101	0.157945	0.409374	0.2032	0.388203	0.212271	0.254806	0.194768	0.0427152	0.322131	0.0674188
UvrABC system protein C (Protein UvrC) (Excinuclease ABC subunit C)	uvrC sll0865	P73580	UVRC_SYNY3	cellular response to DNA damage stimulus [GO:0006974];DNA repair [GO:0006281]	cytoplasm [GO:0005737];excinuclease repair complex [GO:0009380]	DNA binding [GO:0003677];excinuclease ABC activity [GO:0009381]	cellular response to DNA damage stimulus [GO:0006974];cytoplasm [GO:0005737];DNA binding [GO:0003677];DNA repair [GO:0006281];excinuclease ABC activity [GO:0009381];excinuclease repair complex [GO:0009380]	626	2	2	2	5.3	71.896	0.00054885	2.8807	40254000	15	1	-0.438421	1.13037	0.258406	-0.782722	0.381983	0.652004	0.346793	0.611777	0.475464	-0.436012	0.00850249	0.988444	0.00846729		0.011273	0.0148626	0.0128675	0.0101451			0.00784801	0.0097397	0.0153299	0.00995592	0.0174913	0.00566377	0.00585535	0.00480958	0.0101098		0.0109866
N-acetylmuramoyl-L-alanine amidase	amiA	P73581	P73581_SYNY3	peptidoglycan catabolic process [GO:0009253]		N-acetylmuramoyl-L-alanine amidase activity [GO:0008745]	N-acetylmuramoyl-L-alanine amidase activity [GO:0008745];peptidoglycan catabolic process [GO:0009253]	591	3	3	3	4.9	64.376	0	5.5564	70158000	10	1	0.181072	0.325434	0.626235	-0.49422	0.261626	0.709345	-0.446668	0.169549	0.809657	-0.228792	0.692829	0.260721	-0.754907		0.0632939	0.0229659	0.0390447	0.044143		0.0217552	0.0317377		0.0433325	0.027561			0.0510754		0.0254762		0.0242898
Sll0862 protein	sll0862	P73584	P73584_SYNY3		integral component of membrane [GO:0016021]	metalloendopeptidase activity [GO:0004222]	integral component of membrane [GO:0016021];metalloendopeptidase activity [GO:0004222]	503	5	5	5	12.5	54.401	0	39.78	485320000	45	1	0.390607	0.303227	0.679214	0.276436	0.460345	0.587131	0.419205	0.0375739	0.953935	-0.0596931	0.197991	0.740084	-0.188974		0.169353	0.385295	0.107848	0.274986	0.140977	0.444485	0.414873	0.246848	0.105075	0.22084	0.208697	0.242084	0.241329	0.373253	0.156257	0.241286	0.249826
N-acetylmuramic acid 6-phosphate etherase (MurNAc-6-P etherase) (EC 4.2.1.126) (N-acetylmuramic acid 6-phosphate hydrolase) (N-acetylmuramic acid 6-phosphate lyase)	murQ sll0861	P73585	MURQ_SYNY3	carbohydrate metabolic process [GO:0005975];N-acetylmuramic acid catabolic process [GO:0097173]		carbohydrate derivative binding [GO:0097367];carbon-oxygen lyase activity [GO:0016835]	carbohydrate derivative binding [GO:0097367];carbohydrate metabolic process [GO:0005975];carbon-oxygen lyase activity [GO:0016835];N-acetylmuramic acid catabolic process [GO:0097173]	305	6	6	6	27.5	32.18	0	114.5	1288200000	126	1	0.0501869	0.262489	0.819085	0.0682961	0.00582467	0.993387	0.00192536	0.000276163	0.999428	0.000126928	0.0527084	0.947541	-0.0187943		0.757443	0.657761	0.835303	0.562307	0.746817	0.772875	0.683277	0.71069	0.796525	0.695668	0.756904	0.806518	0.728788	0.748838	0.664662	0.788902	0.629769
Sll0860 protein	sll0860	P73586	P73586_SYNY3					173	4	4	4	24.3	19.309	0	7.0015	211150000	11	1	-0.187623	0.174384	0.766472	-0.640825	0.062406	0.917191	-0.272292	0.384672	0.562241	-1.39102	0.446945	0.398628	-1.43962		0.549202	0.521751	0.505741	0.173936		0.345775	0.209488	0.243939	0.0265507	0.167249	0.32567	0.33671	0.118945	0.0395748		0.455846	0.2861
Ssl2595 protein	ssl2595	P73587	P73587_SYNY3					89	5	5	5	52.8	10.356	0	113.07	637760000	77	1	0.459987	0.187198	0.774721	0.261636	0.154657	0.834987	-0.210795	0.441426	0.567797	-0.484393	0.0741738	0.884029	-0.109494		2.18739	0.755673	0.76534	0.2751	1.28256	2.15862	1.92551	0.799679	0.710345	0.930947	0.640594	0.749281	1.17892	1.67833	1.16384	0.931687	0.747888
Sll1315 protein	sll1315	P73588	P73588_SYNY3					352	5	5	5	21.3	38.968	0	33.113	263300000	17	1	-0.0233731	0.284009	0.696864	-0.272164	0.256553	0.714706	-0.425295	0.176319	0.805006	-0.224053	0.525554	0.393736	-0.541874		0.143997	0.211061	0.157287	0.136562	0.0510278	0.194684	0.204879	0.128647	0.075029	0.0797911	0.167773	0.119202	0.105599	0.0732883	0.0837999	0.050689	0.078563
C4-dicarboxylase binding protein	dctP	P73589	P73589_SYNY3	transmembrane transport [GO:0055085]	outer membrane-bounded periplasmic space [GO:0030288]		outer membrane-bounded periplasmic space [GO:0030288];transmembrane transport [GO:0055085]	369	9	9	9	29.8	41.164	0	57.615	1652800000	173	1	-0.260793	1.0973	0.301789	-0.475424	0.720066	0.450978	-0.543955	0.806173	0.394698	-0.475893	2.23656	0.0343759	-0.958174	+	1.24419	0.857396	1.10617	1.00051	0.518288	0.684683	1.08684	0.864174	0.875447	0.440212	0.602521	0.813762	0.681588	0.586916	0.600524	0.488462	0.490557
Sll1308 protein	sll1308	P73591	P73591_SYNY3			oxidoreductase activity [GO:0016491]	oxidoreductase activity [GO:0016491]	248	6	6	6	27	25.861	0	12.158	640310000	42	1	0.170567	0.141114	0.819796	-0.291884	0.34207	0.651835	0.570285	0.075873	0.908155	0.151227	0.283062	0.584438	-0.632734		0.563235	0.516677	0.0787417	0.164679	1.02863	0.487444	0.383778	0.485517	0.157289	0.49072	0.409712	0.243329	0.157309	0.658898	0.136597	0.452571	0.286358
Slr1406 protein	slr1406	P73592	P73592_SYNY3		outer membrane-bounded periplasmic space [GO:0030288]		outer membrane-bounded periplasmic space [GO:0030288]	181	2	2	2	29.3	18.752	0	69.665	298530000	42	1	0.00310702	0.434443	0.550214	0.456216	0.865321	0.421413	0.587205	0.586904	0.475718	0.504167	0.391669	0.526496	0.324846		0.309929	0.162143	0.241814	0.540561	0.507481	0.519936	0.192355	0.168567	0.426256	0.468906	0.718262	0.185588	0.365659	0.572809	0.580309	0.545714	0.334852
Uncharacterized WD repeat-containing protein slr1409	slr1409	P73594	Y1409_SYNY3		outer membrane-bounded periplasmic space [GO:0030288]		outer membrane-bounded periplasmic space [GO:0030288]	326	9	9	9	39.9	35.759	0	72.996	1038700000	99	1	-0.313793	1.11032	0.279159	-0.577304	0.92944	0.420466	-0.484235	0.860208	0.382263	-0.468333	1.39258	0.0986667	-0.663174		0.756289	0.358696	0.757686	0.502825	0.35034	0.409464	0.454686	0.497647	0.490727	0.268421	0.387074	0.394058	0.435357	0.286127	0.257705	0.310533	0.356283
Uncharacterized WD repeat-containing protein slr1410	slr1410	P73595	Y1410_SYNY3		outer membrane-bounded periplasmic space [GO:0030288]		outer membrane-bounded periplasmic space [GO:0030288]	334	7	7	7	31.7	35.989	0	74.884	524260000	54	1	-0.776447	0.209996	0.734222	-0.574804	0.176365	0.792541	-0.482475	0.00649403	0.991443	0.0205069	0.461486	0.38819	-1.32559		0.938813	0.734551	0.321162	0.0203296	0.116019	0.68492	0.243626	0.129013		0.119143	0.28957	0.227333	0.0476649	0.15585	0.145712	0.238014	0.306848
Sll1307 protein	sll1307	P73596	P73596_SYNY3		outer membrane-bounded periplasmic space [GO:0030288]		outer membrane-bounded periplasmic space [GO:0030288]	175	6	6	6	50.3	17.849	0	15.518	559710000	37	1	-0.011013	0.210153	0.748545	-0.334104	0.382252	0.631412	-0.441915	0.437806	0.529966	-0.933393	0.735568	0.249778	-0.696234		0.804469	0.457973	1.40004	1.04451	0.257568	1.38646	0.582667	0.821819	1.22213	0.164627	1.05899	0.646884	1.02057	0.218185	0.285783	0.740267	0.476119
Sll1306 protein	sll1306	P73597	P73597_SYNY3	carbohydrate metabolic process [GO:0005975]	outer membrane-bounded periplasmic space [GO:0030288]	hydrolase activity, acting on carbon-nitrogen (but not peptide) bonds [GO:0016810]	carbohydrate metabolic process [GO:0005975];hydrolase activity, acting on carbon-nitrogen (but not peptide) bonds [GO:0016810];outer membrane-bounded periplasmic space [GO:0030288]	335	16	16	16	48.4	38.27	0	140.07	3715400000	180	1	-0.178073	0.339129	0.64725	-0.290764	0.329982	0.707483	-0.208795	0.209744	0.782038	-0.203353	0.845038	0.216428	-0.631834		0.83997	1.27388	2.33751	1.5616	1.65833	1.56266	1.56454	1.29818	1.27597	0.862844	1.48574	1.74882	1.45839	1.0797	0.57794	1.08254	0.963058
Sll1305 protein	sll1305	P73598	P73598_SYNY3			catalytic activity [GO:0003824]	catalytic activity [GO:0003824]	295	8	8	8	35.9	32.885	0	110.33	1633600000	147	1	0.0516669	0.248515	0.759551	0.153916	0.320419	0.730557	0.169485	0.0911622	0.913363	0.0512469	0.393689	0.545986	-0.267594		0.744018	1.49013	1.39501	1.31597	1.53265	1.25763	1.10615	1.49132	1.45932	1.2324	1.43424	1.87226	1.67617	0.966155	1.22289	1.04364	1.51792
Probable ketose 3-epimerase (EC 5.1.3.-)	sll1304	P73599	Y1304_SYNY3	carbohydrate metabolic process [GO:0005975]		isomerase activity [GO:0016853];metal ion binding [GO:0046872]	carbohydrate metabolic process [GO:0005975];isomerase activity [GO:0016853];metal ion binding [GO:0046872]	287	6	6	6	20.6	32.848	0	44.855	1296500000	96	1	0.388147	1.74911	0.218884	0.605296	1.08315	0.404336	0.479885	0.339382	0.67025	0.263527	0.690312	0.317012	-0.452534		0.61532	0.523635	0.451085	0.526983	0.661644	0.827945	0.734708	1.00242	0.756752	0.421607	0.961383	1.11279	0.991766	0.660315	0.589389	0.586994	0.748925
Sll1785 protein	sll1785	P73600	P73600_SYNY3		outer membrane-bounded periplasmic space [GO:0030288]	metal ion binding [GO:0046872]	metal ion binding [GO:0046872];outer membrane-bounded periplasmic space [GO:0030288]	268	12	12	12	58.2	30.011	0	323.31	7155700000	265	1	-0.0510131	0.0252037	0.97151	-0.0220439	0.0157363	0.984207	0.00774536	0.53875	0.549957	-0.316833	1.43114	0.0733617	-0.993234		5.12556	4.16159	7.13925	4.1882	5.0491	6.60705	5.29064	4.61584	7.34668	2.27643	7.32629	6.70287	5.9681	3.50794	2.90189	5.36626	4.37443
Sll1784 protein	sll1784	P73601	P73601_SYNY3		outer membrane-bounded periplasmic space [GO:0030288]		outer membrane-bounded periplasmic space [GO:0030288]	267	9	9	9	34.5	29.757	0	209.7	4110400000	175	1	-0.045653	0.213417	0.765104	-0.204424	0.145808	0.867692	0.0886653	0.478612	0.559935	-0.398353	1.57078	0.057434	-1.11477		1.939	3.33765	2.87841	3.06828	3.70796	3.77691	3.31301	3.01048	3.14572	1.52676	3.56446	4.23564	3.09271	2.0792	1.07489	3.35431	2.84099
Uncharacterized protein sll1783	sll1783	P73602	Y1783_SYNY3			catalytic activity [GO:0003824]	catalytic activity [GO:0003824]	147	5	5	5	32.7	16.822	0	172.02	1030300000	51	1	0.013667	0.476153	0.543474	0.364896	1.33824	0.377358	0.426685	0.208649	0.791994	-0.174193	1.04851	0.137951	-0.855354		0.654429	1.02629	1.03023	0.992906	0.893306	1.11853	0.90159	1.1365	1.21091	0.46367	2.03296	1.32802	1.47373	1.06594	0.512524	1.34874	1.31284
Slr1852 protein	slr1852	P73603	P73603_SYNY3					188	17	17	17	71.8	21.834	0	323.31	22077000000	450	1	0.0536869	0.00976528	0.992202	-0.00760384	0.00674763	0.993285	-0.00283465	0.11462	0.90735	-0.0458131	0.782757	0.285276	-0.420674		12.7844	12.2885	15.1555	13.7145	17.5978	19.4879	11.6055	16.2345	19.5866	9.62423	19.2566	18.9533	17.385	10.6127	8.31141	16.805	12.4131
Slr1853 protein	slr1853	P73604	P73604_SYNY3			peroxiredoxin activity [GO:0051920]	peroxiredoxin activity [GO:0051920]	113	6	6	6	73.5	12.111	0	189.06	3505200000	134	1	0.144187	0.663708	0.422767	0.455096	0.965429	0.420638	0.456145	0.669946	0.468344	0.379727	0.0417408	0.942738	0.0357258		1.63877	3.16331	2.81546	2.04702	4.14315	2.4143	2.7567	3.4245	3.53667	2.53111	5.01929	5.10029	4.05182	2.50972	2.30217	4.16818	3.01487
Slr1854 protein	slr1854	P73605	P73605_SYNY3					198	9	9	9	60.1	22.293	0	107.1	11093000000	190	1	0.067227	0.207045	0.791771	0.132776	0.971839	0.531129	0.196205	0.0811517	0.932057	0.0344269	1.10969	0.177694	-0.460134		8.63149	9.68488	9.73764	7.75877	9.44615	15.0596	9.12132	8.10489	10.8641	6.22671	14.2233	13.8362	10.9577	7.40103	5.92244	11.4917	9.16919
Slr1855 protein	slr1855	P73606	P73606_SYNY3			catalytic activity [GO:0003824]	catalytic activity [GO:0003824]	607	27	27	27	57.3	70.003	0	323.31	12688000000	590	1	-0.028753	0.124917	0.887476	-0.0824439	0.0959767	0.914179	-0.0528947	0.178108	0.835637	-0.0952131	1.08105	0.15945	-0.576674		2.16837	2.69434	3.73594	3.1506	3.63518	3.98729	2.36517	3.20738	4.57189	1.63622	3.68811	3.58303	3.38175	2.32354	1.80913	3.09045	2.09332
Anti-sigma factor antagonist	slr1856	P73607	P73607_SYNY3	regulation of transcription, DNA-templated [GO:0006355]		antisigma factor binding [GO:0045152]	antisigma factor binding [GO:0045152];regulation of transcription, DNA-templated [GO:0006355]	109	2	2	2	31.2	11.887	0	12.233	238310000	4	1	0.0160869	0.212192	0.773513	0.177256	0.117219	0.886702	0.0919253	0.19226	0.810032	-0.138633	1.48803	0.0736597	-0.861174		0.286123	0.580205	0.379474	0.263967	0.357429	0.495208	0.458325	0.456724	0.294327	0.205979	0.5383	0.736001	0.337643	0.299064	0.274617	0.386574	0.346396
Glycogen operon protein GlgX	glgX	P73608	P73608_SYNY3	glycogen catabolic process [GO:0005980]		cation binding [GO:0043169];glycogen debranching enzyme activity [GO:0004133];hydrolase activity, hydrolyzing O-glycosyl compounds [GO:0004553];transferase activity [GO:0016740]	cation binding [GO:0043169];glycogen catabolic process [GO:0005980];glycogen debranching enzyme activity [GO:0004133];hydrolase activity, hydrolyzing O-glycosyl compounds [GO:0004553];transferase activity [GO:0016740]	707	17	17	17	28.7	79.894	0	217.1	4546100000	283	1	0.057687	0.138618	0.879553	0.0804961	0.78565	0.561647	0.193845	0.0826896	0.926455	0.0394869	0.917278	0.232355	-0.448374		0.988018	1.16727	1.03826	0.912394	1.30019	1.47377	1.25505	1.05153	1.2058	0.73973	1.40035	1.63646	1.19489	0.909362	0.754029	1.2744	1.12217
Anti-sigma factor antagonist	slr1859	P73609	P73609_SYNY3	regulation of transcription, DNA-templated [GO:0006355]		antisigma factor binding [GO:0045152]	antisigma factor binding [GO:0045152];regulation of transcription, DNA-templated [GO:0006355]	108	4	4	4	39.8	11.99	0	288.75	1473700000	96	1	0.155087	0.271027	0.748231	0.152456	0.90734	0.481233	0.273685	0.0497475	0.95196	0.0310669	1.33177	0.130788	-0.502614		2.29455	3.27191	2.69199	2.09526	2.78336	3.72672	2.4288	2.70812	3.35425	2.45372	4.09733	4.05718	2.35573	2.4477	2.08564	3.82012	2.79955
Anthranilate phosphoribosyltransferase (EC 2.4.2.18)	trpD slr1867	P73617	TRPD_SYNY3	tryptophan biosynthetic process [GO:0000162]		anthranilate phosphoribosyltransferase activity [GO:0004048];metal ion binding [GO:0046872]	anthranilate phosphoribosyltransferase activity [GO:0004048];metal ion binding [GO:0046872];tryptophan biosynthetic process [GO:0000162]	348	6	6	6	39.7	36.005	0	78.051	524030000	58	1	0.337127	0.17491	0.799477	0.191576	0.422877	0.628013	0.337625	0.0230268	0.974471	0.0273068	0.21673	0.701803	-0.284474		0.631437	0.522692	0.165198	0.332524	0.351629	0.525553	0.566302	0.556708	0.282122	0.43872	0.332697	0.252242	0.547857	0.735668	0.366121	0.529762	0.61395
Deoxyribose-phosphate aldolase (DERA) (EC 4.1.2.4) (2-deoxy-D-ribose 5-phosphate aldolase) (Phosphodeoxyriboaldolase) (Deoxyriboaldolase)	deoC sll1776	P73618	DEOC_SYNY3	carbohydrate catabolic process [GO:0016052];deoxyribonucleotide catabolic process [GO:0009264];deoxyribose phosphate catabolic process [GO:0046386]	cytoplasm [GO:0005737]	deoxyribose-phosphate aldolase activity [GO:0004139]	carbohydrate catabolic process [GO:0016052];cytoplasm [GO:0005737];deoxyribonucleotide catabolic process [GO:0009264];deoxyribose phosphate catabolic process [GO:0046386];deoxyribose-phosphate aldolase activity [GO:0004139]	225	3	3	3	20.4	23.874	0	16.079	480010000	68	1	-0.202773	0.163029	0.820024	0.144876	0.0553871	0.943192	0.0358053	0.142128	0.850904	-0.117413	0.416099	0.512424	-0.314734		0.376549	0.367072	0.230777	0.240653	0.203518	0.392784	0.306815	0.21069	0.223879	0.136103	0.480791	0.401391	0.228643	0.369802	0.158186	0.388912	0.225078
Sll1775 protein	sll1775	P73619	P73619_SYNY3	glucosylceramide catabolic process [GO:0006680]	membrane [GO:0016020]	glucosylceramidase activity [GO:0004348]	glucosylceramidase activity [GO:0004348];glucosylceramide catabolic process [GO:0006680];membrane [GO:0016020]	817	18	18	18	28.4	92.365	0	177.47	1613600000	156	1	-0.186053	1.35096	0.361189	-0.244164	0.144679	0.891467	-0.0555546	0.0533074	0.960206	-0.0186731	0.0471934	0.94801	-0.0191943		0.431673	0.371423	0.298494	0.354174	0.384519	0.371854	0.363176	0.270649	0.323378	0.289367	0.326574	0.330903	0.268552	0.302987	0.318021	0.385958	0.28895
Slr1870 protein	slr1870	P73622	P73622_SYNY3					249	3	3	3	10.4	27.693	0	16.085	164010000	28	1	-0.088853	0.254433	0.70597	-0.353784	0.157162	0.835444	-0.198495	0.674124	0.408185	-0.730273	1.81427	0.0408	-1.24841	+	0.125652	0.155322	0.0471	0.103187	0.171126	0.154161	0.23848	0.157072	0.0443504	0.0465805	0.0399706	0.175043	0.0429938	0.18271	0.086659	0.0724494	0.176103
Endonuclease MutS2 (EC 3.1.-.-)	mutS2 mutSB sll1772	P73625	MUTS2_SYNY3	mismatch repair [GO:0006298];negative regulation of DNA recombination [GO:0045910]	mismatch repair complex [GO:0032300]	ATP binding [GO:0005524];damaged DNA binding [GO:0003684];DNA-dependent ATPase activity [GO:0008094];endonuclease activity [GO:0004519];mismatched DNA binding [GO:0030983]	ATP binding [GO:0005524];damaged DNA binding [GO:0003684];DNA-dependent ATPase activity [GO:0008094];endonuclease activity [GO:0004519];mismatch repair [GO:0006298];mismatch repair complex [GO:0032300];mismatched DNA binding [GO:0030983];negative regulation of DNA recombination [GO:0045910]	822	11	11	11	20.1	90.669	0	31.757	342270000	50	1	0.143467	1.24686	0.262517	0.547796	0.260222	0.748707	0.205345	0.455124	0.586225	0.331427	1.10056	0.130899	0.790506		0.0363906	0.0556581	0.0766735	0.0452082	0.0357659	0.0752433	0.0527145	0.0397581	0.0517389	0.0505996	0.0571891	0.0819211	0.0909913	0.057461	0.0684357	0.0922452	0.0470225
Sll1771 protein	sll1771	P73626	P73626_SYNY3			protein serine/threonine phosphatase activity [GO:0004722]	protein serine/threonine phosphatase activity [GO:0004722]	254	19	19	19	77.2	28.472	0	323.31	3070700000	273	1	-0.087073	0.283801	0.756344	0.125116	0.724213	0.553374	0.229125	0.514529	0.625036	0.184747	0.689908	0.439684	0.217866		1.00146	1.74175	1.54101	1.66882	1.8152	0.918217	1.84592	1.91746	1.13855	1.62729	1.33208	1.93479	1.56805	1.93432	1.60703	1.84768	1.66197
Uncharacterized protein sll1770	sll1770	P73627	Y1770_SYNY3			ATP binding [GO:0005524];protein kinase activity [GO:0004672]	ATP binding [GO:0005524];protein kinase activity [GO:0004672]	585	13	13	13	30.8	67.127	0	91.663	714330000	151	1	-0.025893	0.243541	0.747701	0.192256	0.386785	0.672372	0.239625	0.442349	0.608548	0.280247	0.29673	0.634593	0.234406		0.156584	0.16292	0.0769824	0.17838	0.207147	0.165111	0.14186	0.175567	0.0824059	0.195762	0.132052	0.17298	0.115461	0.258731	0.207056	0.172649	0.16859
Probable thylakoid lumen protein sll1769	sll1769	P73628	Y1769_SYNY3		thylakoid lumen [GO:0031977]		thylakoid lumen [GO:0031977]	105	3	3	3	51.4	11.558	0	24.2	168830000	34	1	0.675747	0.0254075	0.963265	0.0785166	0.206781	0.754065	0.555926	0.103882	0.865283	0.305687	0.310566	0.545535	0.773306		0.365593	0.374525	0.124816	0.335766		0.304942	0.219021	0.172216	0.335827	0.12945	0.210557	0.177093	0.105176	0.110685	0.145379	0.199563	0.235662
[truncated: 1,050 more rows]
[truncated: 65 more columns]
