# Supplementary material for: Quantitative insights into the cyanobacterial cell economy
Source: eLife. 2019 Feb 4;8:e42508. doi: 10.7554/eLife.42508 (PMC6391073; doi:10.7554/eLife.42508)
Supplement: Figure 3—source data 3. [file elife-42508-fig3-data3.xlsx]

## Sheet: Zavrel2018_Fig3_Supplement3_Hou
	Protein IDs	Protein names	Gene names	Number of proteins	Gene ontology (biological process)	Gene ontology (cellular component)	Gene ontology (molecular function)	Gene ontology (GO)	Peptides	Razor + unique peptides	Unique peptides	Sequence coverage [%]	Mol. weight [kDa]	Q-value	Score	Intensity	MS/MS count	ANOVA Significant	-Log ANOVA p value	ANOVA q-value	Student's T-test Significant 0055_0027.5	-Log Student's T-test p-value 0055_0027.5	Student's T-test q-value 0055_0027.5	Student's T-test Difference 0055_0027.5	Student's T-test Significant 0110_0027.5	-Log Student's T-test p-value 0110_0027.5	Student's T-test q-value 0110_0027.5	Student's T-test Difference 0110_0027.5	Student's T-test Significant 0220_0027.5	-Log Student's T-test p-value 0220_0027.5	Student's T-test q-value 0220_0027.5	Student's T-test Difference 0220_0027.5	Student's T-test Significant 0440_0027.5	-Log Student's T-test p-value 0440_0027.5	Student's T-test q-value 0440_0027.5	Student's T-test Difference 0440_0027.5	Student's T-test Significant 1100_0027.5	-Log Student's T-test p-value 1100_0027.5	Student's T-test q-value 1100_0027.5	Student's T-test Difference 1100_0027.5	0027.5_1	0027.5_2	0027.5_3	0027.5_4	0027.5_5	0055_1	0055_2	0055_3	0055_4
1	P0DJF8	S-methyl-5'-thioadenosine phosphorylase (EC 2.4.2.28) (5'-methylthioadenosine phosphorylase) (MTA phosphorylase) (MTAP)	mtnP sll0135	1	L-methionine salvage from methylthioadenosine [GO:0019509]; purine ribonucleoside salvage [GO:0006166]		S-methyl-5-thioadenosine phosphorylase activity [GO:0017061]	S-methyl-5-thioadenosine phosphorylase activity [GO:0017061]; L-methionine salvage from methylthioadenosine [GO:0019509]; purine ribonucleoside salvage [GO:0006166]	8	8	8	45,1	35,318	0	306,37	2768300000	186		0,241099	0,867568		0,120704688	0,961105925	0,044185257		0,622409057	0,524718072	0,144097519		0,782832616	0,448883797	0,21180954		0,415002549	0,655141928	0,116424179		0,167623642	0,805189831	0,059399796	3	5	4	6	6	5	6	8	5
2	P20169	Drug sensory protein A (EC 2.7.13.3)	dspA dfr sll0698	1	regulation of transcription, DNA-templated [GO:0006355]; response to herbicide [GO:0009635]	integral component of membrane [GO:0016021]; intracellular [GO:0005622]; plasma membrane [GO:0005886]	ATP binding [GO:0005524]; phosphorelay sensor kinase activity [GO:0000155]	integral component of membrane [GO:0016021]; intracellular [GO:0005622]; plasma membrane [GO:0005886]; ATP binding [GO:0005524]; phosphorelay sensor kinase activity [GO:0000155]; regulation of transcription, DNA-templated [GO:0006355]; response to herbicide [GO:0009635]	10	10	10	23,7	74,535	0	81,403	770070000	136		0,574304	0,477214		0,246259852	0,942730479	0,141517639		0,064855812	0,923711769	0,037464523		0,179238134	0,821627737	0,090308762		0,065296484	0,932886731	-0,040829849		0,837544218	0,213761006	-0,378572083	3	6	4	4	2	3	6	5	5
3	P21697	Plastocyanin	petE sll0199	1		thylakoid membrane [GO:0042651]	copper ion binding [GO:0005507]; electron transfer activity [GO:0009055]	thylakoid membrane [GO:0042651]; copper ion binding [GO:0005507]; electron transfer activity [GO:0009055]	4	4	4	57,1	13,146	0	323,31	9799400000	148		0,271815	0,372297		0,564334861	1	-0,89423027		0,132322561	0,800182616	0,139957428		0,027320914	0,973138414	-0,044411087		0,197742968	0,72393047	-0,328995132		0,226597451	0,627459357	0,254218292	6	7	9	4	4	3	5	2	6
4	P22040	Uncharacterized ABC transporter ATP-binding protein sll0415	sll0415	1			ATPase activity [GO:0016887]; ATP binding [GO:0005524]	ATP binding [GO:0005524]; ATPase activity [GO:0016887]	7	7	7	36,4	39,5	0	100,98	811540000	86		0,0223207	0,975577		0,185869834	0,953290183	0,098157501		0,041635729	0,946241998	-0,032065201		0,00658741	0,997950636	0,004579926		0,058611935	0,939365385	-0,036843872		0,159426804	0,773788114	-0,091485214	1	4	3	2	2	1	2	3	2
5	P23349	50S ribosomal protein L7/L12	rplL rpl12 sll1746	1	translation [GO:0006412]	ribosome [GO:0005840]	structural constituent of ribosome [GO:0003735]	ribosome [GO:0005840]; structural constituent of ribosome [GO:0003735]; translation [GO:0006412]	9	9	9	64,8	13,259	0	180,34	14379000000	224		0,29766	0,759321		0,529177544	0,971081545	0,180419159		0,693689874	0,400757079	0,245933151		1,061736333	0,351517241	0,28571434		0,651264771	0,471119534	0,212177277		0,625674619	0,394747573	0,212545395	4	6	7	7	8	6	6	8	8
6	P23353	Chorismate synthase (CS) (EC 4.2.3.5) (5-enolpyruvylshikimate-3-phosphate phospholyase)	aroC sll1747	1	aromatic amino acid family biosynthetic process [GO:0009073]; chorismate biosynthetic process [GO:0009423]	cytosol [GO:0005829]	chorismate synthase activity [GO:0004107]; FMN binding [GO:0010181]	cytosol [GO:0005829]; chorismate synthase activity [GO:0004107]; FMN binding [GO:0010181]; aromatic amino acid family biosynthetic process [GO:0009073]; chorismate biosynthetic process [GO:0009423]	16	16	16	56,4	39,287	0	323,31	6806900000	308		0,459354	0,854056		0,453659582	0,931853503	-0,128009796		0,73554511	0,497982256	-0,144049835		0,941239649	0,452780645	-0,174484253		0,490709865	0,655147826	-0,100999451		0,029469055	0,963686275	-0,010105515	7	15	11	11	9	9	12	6	10
7	P26523	NAD(P)H-quinone oxidoreductase chain 6 (EC 1.6.5.-) (NAD(P)H dehydrogenase I, chain 6) (NDH-1, chain 6)	ndhG sll0521	1		integral component of membrane [GO:0016021]	NADH dehydrogenase (ubiquinone) activity [GO:0008137]; quinone binding [GO:0048038]	integral component of membrane [GO:0016021]; NADH dehydrogenase (ubiquinone) activity [GO:0008137]; quinone binding [GO:0048038]	4	4	4	12,1	21,522	0	103,15	1651100000	106		0,422011	0,524588		0,229820353	0,937265207	-0,140939331		0,138748126	0,836054422	0,063554764		0,858799382	0,381209877	0,292428207		0,186277344	0,794003795	-0,116979218		0,399730785	0,524429646	-0,195726013	4	5	3	2	3	3	4	4	2
8	P26525	NAD(P)H-quinone oxidoreductase subunit I (EC 1.6.5.-) (NAD(P)H dehydrogenase I subunit I) (NDH-1 subunit I) (NDH-I)	ndhI sll0520	1		thylakoid membrane [GO:0042651]	4 iron, 4 sulfur cluster binding [GO:0051539]; metal ion binding [GO:0046872]; NADH dehydrogenase (ubiquinone) activity [GO:0008137]; quinone binding [GO:0048038]	thylakoid membrane [GO:0042651]; 4 iron, 4 sulfur cluster binding [GO:0051539]; metal ion binding [GO:0046872]; NADH dehydrogenase (ubiquinone) activity [GO:0008137]; quinone binding [GO:0048038]	11	11	11	60,6	22,15	0	127,53	4151300000	100		0,0361295	0,987092		0,063976768	0,988149378	0,026024628		0,284492423	0,697653021	0,111902237		0,171001375	0,851755536	0,064123154		0,066758647	0,9408544	0,027783203		0,413481973	0,592928571	0,115790176	1	3	3	2	2	3	3	1	1
9	P26533	ATP synthase epsilon chain (ATP synthase F1 sector epsilon subunit) (F-ATPase epsilon subunit)	atpC atpE slr1330	1	ATP synthesis coupled proton transport [GO:0015986]	plasma membrane proton-transporting ATP synthase complex [GO:0045260]; proton-transporting ATP synthase complex, catalytic core F(1) [GO:0045261]; thylakoid membrane [GO:0042651]	proton-transporting ATP synthase activity, rotational mechanism [GO:0046933]	plasma membrane proton-transporting ATP synthase complex [GO:0045260]; proton-transporting ATP synthase complex, catalytic core F(1) [GO:0045261]; thylakoid membrane [GO:0042651]; proton-transporting ATP synthase activity, rotational mechanism [GO:0046933]; ATP synthesis coupled proton transport [GO:0015986]	5	5	5	38,2	14,58	0	164,12	3849300000	116		0,428465	0,636919		0,432730968	0,950822669	0,177603531		0,996644743	0,280798301	0,312038803		1,02403849	0,331245509	0,372095871		0,503795162	0,523839378	0,210369873		0,28686396	0,614040191	0,1570961	4	4	3	3	3	6	4	6	4
10	P27181	ATP synthase subunit b (ATP synthase F(0) sector subunit b) (ATPase subunit I) (F-type ATPase subunit b) (F-ATPase subunit b)	atpF sll1324	1	ATP synthesis coupled proton transport [GO:0015986]	integral component of membrane [GO:0016021]; plasma membrane proton-transporting ATP synthase complex [GO:0045260]; proton-transporting ATP synthase complex, coupling factor F(o) [GO:0045263]; thylakoid membrane [GO:0042651]	hydrogen ion transmembrane transporter activity [GO:0015078]	integral component of membrane [GO:0016021]; plasma membrane proton-transporting ATP synthase complex [GO:0045260]; proton-transporting ATP synthase complex, coupling factor F(o) [GO:0045263]; thylakoid membrane [GO:0042651]; hydrogen ion transmembrane transporter activity [GO:0015078]; ATP synthesis coupled proton transport [GO:0015986]	18	18	18	60,3	19,804	0	323,31	12163000000	294		0,0715443	0,92946		0,150494162	0,957525692	0,074513245		0,523181141	0,499803279	0,205182648		0,382930415	0,644250284	0,157665634		0,128288267	0,866607485	0,069270706		0,172383359	0,772327869	0,081275177	9	6	10	5	7	11	6	7	7
11	P27183	ATP synthase subunit b' (ATP synthase F(0) sector subunit b') (ATPase subunit II) (F-type ATPase subunit b') (F-ATPase subunit b')	atpG sll1323	1	ATP synthesis coupled proton transport [GO:0015986]	integral component of membrane [GO:0016021]; plasma membrane proton-transporting ATP synthase complex [GO:0045260]; proton-transporting ATP synthase complex, coupling factor F(o) [GO:0045263]; thylakoid membrane [GO:0042651]	hydrogen ion transmembrane transporter activity [GO:0015078]	integral component of membrane [GO:0016021]; plasma membrane proton-transporting ATP synthase complex [GO:0045260]; proton-transporting ATP synthase complex, coupling factor F(o) [GO:0045263]; thylakoid membrane [GO:0042651]; hydrogen ion transmembrane transporter activity [GO:0015078]; ATP synthesis coupled proton transport [GO:0015986]	9	9	9	59,4	16,245	0	323,31	5116100000	191		0,149096	0,83764		0,09522168	0,965229956	-0,048763275		0,2701178	0,69654741	0,123067856		0,204255629	0,82384029	-0,071240616		0,112061523	0,885095238	0,058352661		0,450000305	0,52935615	0,158467102	7	8	8	4	6	6	6	8	3
12	P27320	Ferredoxin-1 (Ferredoxin I)	petF fed ssl0020	1			2 iron, 2 sulfur cluster binding [GO:0051537]; electron transfer activity [GO:0009055]; metal ion binding [GO:0046872]	2 iron, 2 sulfur cluster binding [GO:0051537]; electron transfer activity [GO:0009055]; metal ion binding [GO:0046872]	2	2	2	41,2	10,363	0	132,54	6506100000	97		0,28841	0,532		0,334460197	0,959374765	-0,344958878		0,46250186	0,516819512	0,219423676		0,605961408	0,560679341	0,146750641		0,427360163	0,654912664	0,115047455		0,232775145	0,669273559	0,138252258	3	3	4	4	4	1	6	3	2
13	P27589	Cytochrome b6-f complex subunit 4 (17 kDa polypeptide)	petD slr0343	1	photosynthetic electron transport chain [GO:0009767]	cytochrome b6f complex [GO:0009512]; integral component of membrane [GO:0016021]; thylakoid membrane [GO:0042651]	electron transporter, transferring electrons within the cyclic electron transport pathway of photosynthesis activity [GO:0045156]	cytochrome b6f complex [GO:0009512]; integral component of membrane [GO:0016021]; thylakoid membrane [GO:0042651]; electron transporter, transferring electrons within the cyclic electron transport pathway of photosynthesis activity [GO:0045156]; photosynthetic electron transport chain [GO:0009767]	3	3	3	13,1	17,444	0	78,362	6539600000	86		0,149936	0,644323		0,438598365	1	-0,379488754		0,660559231	0,322359926	-0,51529007		0,42432368	0,533291723	-0,329483414		0,571127777	0,395290435	-0,495849991		0,31437051	0,54535857	-0,285235214	3	4	2	2	3	5	2	4	2
14	P29254	Photosystem I P700 chlorophyll a apoprotein A1 (EC 1.97.1.12) (PsaA)	psaA slr1834	1	photosynthesis [GO:0015979]; protein-chromophore linkage [GO:0018298]	integral component of membrane [GO:0016021]; plasma membrane-derived photosystem I [GO:0030094]; thylakoid membrane [GO:0042651]	4 iron, 4 sulfur cluster binding [GO:0051539]; chlorophyll binding [GO:0016168]; metal ion binding [GO:0046872]; oxidoreductase activity [GO:0016491]	integral component of membrane [GO:0016021]; plasma membrane-derived photosystem I [GO:0030094]; thylakoid membrane [GO:0042651]; 4 iron, 4 sulfur cluster binding [GO:0051539]; chlorophyll binding [GO:0016168]; metal ion binding [GO:0046872]; oxidoreductase activity [GO:0016491]; photosynthesis [GO:0015979]; protein-chromophore linkage [GO:0018298]	24	24	24	23,8	82,949	0	323,31	321910000000	864		1,16788	0,248543		0,37914444	0,942615641	-0,17582283		1,022119195	0,225284916	-0,461083984		0,654567615	0,44218543	-0,279732513		0,893868359	0,305081365	-0,430165482	+	1,69355726	0,027661376	-0,916778183	21	29	29	32	29	28	32	37	28
15	P36265	Transcription termination/antitermination protein NusG	nusG sll1742	1	DNA-templated transcription, termination [GO:0006353]; regulation of DNA-templated transcription, elongation [GO:0032784]; regulation of transcription, DNA-templated [GO:0006355]; transcription antitermination [GO:0031564]	cytosol [GO:0005829]		cytosol [GO:0005829]; DNA-templated transcription, termination [GO:0006353]; regulation of DNA-templated transcription, elongation [GO:0032784]; regulation of transcription, DNA-templated [GO:0006355]; transcription antitermination [GO:0031564]	15	15	15	62	23,416	0	323,31	6872100000	243		0,741708	0,525174		0,021893734	0,992259939	0,008275223		0,504347723	0,602718954	0,11586113		0,201907388	0,838206649	0,062799835		0,701343811	0,439160187	0,230217361		1,325714318	0,107991614	0,379685974	5	7	9	7	7	9	7	8	8
16	P38382	Protein translocase subunit SecE	secE ssl3335	1	protein secretion [GO:0009306]; protein targeting [GO:0006605]	integral component of membrane [GO:0016021]; plasma membrane [GO:0005886]; thylakoid membrane [GO:0042651]	P-P-bond-hydrolysis-driven protein transmembrane transporter activity [GO:0015450]	integral component of membrane [GO:0016021]; plasma membrane [GO:0005886]; thylakoid membrane [GO:0042651]; P-P-bond-hydrolysis-driven protein transmembrane transporter activity [GO:0015450]; protein secretion [GO:0009306]; protein targeting [GO:0006605]	3	3	3	39,5	9,1335	0	323,31	1785700000	69		0,467148	0,615164		0,059281012	0,988696945	0,026064301		0,674252806	0,467171123	-0,181954193		0,630393666	0,581770171	-0,127764893		0,061527969	0,945395422	-0,022584534		0,478113274	0,472550336	0,201264954	3	2	2	2	2	2	1	3	2
17	P42349	Uncharacterized methyltransferase sll1242 (EC 2.1.1.-) (ORF N)	sll1242	1			4 iron, 4 sulfur cluster binding [GO:0051539]; cobalamin binding [GO:0031419]; metal ion binding [GO:0046872]; methyltransferase activity [GO:0008168]	4 iron, 4 sulfur cluster binding [GO:0051539]; cobalamin binding [GO:0031419]; metal ion binding [GO:0046872]; methyltransferase activity [GO:0008168]	19	19	19	44,4	61,755	0	90,816	2041200000	176		0,885224	0,301286		0,037210399	0,989465378	-0,033573914		0,818352307	0,286954357	0,416672134		0,760013343	0,370537445	0,409324265		0,859227896	0,287643077	0,605443192		1,342945792	0,066986523	0,583045197	0	4	1	1	5	5	3	3	1
18	P48054	Imidazoleglycerol-phosphate dehydratase (IGPD) (EC 4.2.1.19)	hisB slr0500	1	histidine biosynthetic process [GO:0000105]	cytoplasm [GO:0005737]	imidazoleglycerol-phosphate dehydratase activity [GO:0004424]	cytoplasm [GO:0005737]; imidazoleglycerol-phosphate dehydratase activity [GO:0004424]; histidine biosynthetic process [GO:0000105]	2	2	2	11,4	23,063	0,0010881	2,6942	454990000	19		0,273002	0,434374		0,387064098	1	0,508092117		0,450458725	0,433490085	0,550446701		0,200158007	0,732351379	0,336097717		0,094394976	0,868111015	0,180134583		0,803183356	0,138376164	0,895969772	1	0	0	0	0	0	0	0	0
19	P48944	30S ribosomal protein S14	rpsN rps14 slr0628	1	translation [GO:0006412]	small ribosomal subunit [GO:0015935]	rRNA binding [GO:0019843]; structural constituent of ribosome [GO:0003735]	small ribosomal subunit [GO:0015935]; rRNA binding [GO:0019843]; structural constituent of ribosome [GO:0003735]; translation [GO:0006412]	6	6	6	46	11,854	0	117,3	7839500000	80		0,578346	0,247471		0,392954166	1	-0,722844315		0,576805911	0,323117757	-0,939437103		0,762719379	0,307294915	-1,181063461		0,047838805	0,93583884	-0,108818817		0,230490241	0,605907933	0,396361923	2	0	3	2	3	0	0	4	3
20	P48946	30S ribosomal protein S18	rpsR rps18 ssr1399	1	translation [GO:0006412]	cytosolic small ribosomal subunit [GO:0022627]	rRNA binding [GO:0019843]; structural constituent of ribosome [GO:0003735]	cytosolic small ribosomal subunit [GO:0022627]; rRNA binding [GO:0019843]; structural constituent of ribosome [GO:0003735]; translation [GO:0006412]	13	13	13	71,8	8,3808	0	74,022	20325000000	301		0,263773	0,626864		0,022375105	0,990098462	0,012628555		0,769087139	0,393969697	0,224038696		0,315034888	0,686150538	0,154080582		0,564468547	0,470075581	0,262966919		0,813760975	0,210687797	0,410121536	9	8	7	7	10	7	7	10	10
21	P52208	6-phosphogluconate dehydrogenase, decarboxylating (EC 1.1.1.44)	gnd sll0329	1	D-gluconate metabolic process [GO:0019521]; pentose-phosphate shunt [GO:0006098]		phosphogluconate dehydrogenase (decarboxylating) activity [GO:0004616]	phosphogluconate dehydrogenase (decarboxylating) activity [GO:0004616]; D-gluconate metabolic process [GO:0019521]; pentose-phosphate shunt [GO:0006098]	28	28	28	66,6	52,873	0	323,31	30713000000	659		0,444659	0,68571		0,217221986	0,946399128	-0,084811783		0,654358194	0,426212034	-0,233660889		0,846647506	0,379037344	-0,302930832		0,649090428	0,452845238	-0,231568146		0,280181892	0,679757246	-0,093626022	21	25	18	24	21	14	24	28	19
22	P52231	Thioredoxin (Trx)	trxA slr0623	1	cell redox homeostasis [GO:0045454]; cellular response to oxidative stress [GO:0034599]; glycerol ether metabolic process [GO:0006662]	cytoplasm [GO:0005737]	oxidoreductase activity, acting on a sulfur group of donors, disulfide as acceptor [GO:0016671]; protein disulfide oxidoreductase activity [GO:0015035]; protein-disulfide reductase activity [GO:0047134]; thioredoxin-disulfide reductase activity [GO:0004791]	cytoplasm [GO:0005737]; oxidoreductase activity, acting on a sulfur group of donors, disulfide as acceptor [GO:0016671]; protein disulfide oxidoreductase activity [GO:0015035]; protein-disulfide reductase activity [GO:0047134]; thioredoxin-disulfide reductase activity [GO:0004791]; cell redox homeostasis [GO:0045454]; cellular response to oxidative stress [GO:0034599]; glycerol ether metabolic pr…	11	11	11	99,1	11,748	0	323,31	26657000000	317		0,476867	0,537838		0,429502835	0,964916667	-0,241310883		0,635849823	0,374910256	-0,349375534		0,808391589	0,360364465	-0,391766739		0,837709179	0,318451306	-0,417071915		0,887594314	0,183857385	-0,42498703	10	8	12	12	9	9	11	12	13
23	P52415	Glucose-1-phosphate adenylyltransferase (EC 2.7.7.27) (ADP-glucose pyrophosphorylase) (ADPGlc PPase) (ADP-glucose synthase)	glgC agp slr1176	1	glycogen biosynthetic process [GO:0005978]		ATP binding [GO:0005524]; glucose-1-phosphate adenylyltransferase activity [GO:0008878]	ATP binding [GO:0005524]; glucose-1-phosphate adenylyltransferase activity [GO:0008878]; glycogen biosynthetic process [GO:0005978]	45	45	45	81,5	49,366	0	323,31	37721000000	964		0,110384	0,990363		0,14850263	0,962344335	0,033894348		0,094287894	0,941388142	0,016257477		0,278115921	0,822547771	0,054780197		0,022712936	0,986377246	0,003606796		0,315493322	0,771724138	-0,046551514	21	37	26	35	29	21	30	34	25
24	P52981	1,4-alpha-glucan branching enzyme GlgB (EC 2.4.1.18) (1,4-alpha-D-glucan:1,4-alpha-D-glucan 6-glucosyl-transferase) (Alpha-(1->4)-glucan branching enzyme) (Glycogen branching enzyme) (BE)	glgB sll0158	1	glycogen biosynthetic process [GO:0005978]		1,4-alpha-glucan branching enzyme activity [GO:0003844]; 1,4-alpha-glucan branching enzyme activity (using a glucosylated glycogenin as primer for glycogen synthesis) [GO:0102752]; cation binding [GO:0043169]; hydrolase activity, hydrolyzing O-glycosyl compounds [GO:0004553]	1,4-alpha-glucan branching enzyme activity [GO:0003844]; 1,4-alpha-glucan branching enzyme activity (using a glucosylated glycogenin as primer for glycogen synthesis) [GO:0102752]; cation binding [GO:0043169]; hydrolase activity, hydrolyzing O-glycosyl compounds [GO:0004553]; glycogen biosynthetic process [GO:0005978]	17	17	17	26,2	89,526	0	308,75	12135000000	371		0,0784124	0,987137		0,46423198	0,938344411	0,10983429		0,334801615	0,713464355	0,083519745		0,269506021	0,804707203	0,067956161		0,357800524	0,719355897	0,093264771		0,287990135	0,715287622	0,071956253	11	17	9	12	13	8	14	13	12
25	P52983	Glucose-6-phosphate isomerase (GPI) (EC 5.3.1.9) (Phosphoglucose isomerase) (PGI) (Phosphohexose isomerase) (PHI)	pgi slr1349	1	gluconeogenesis [GO:0006094]; glycolytic process [GO:0006096]	cytoplasm [GO:0005737]	glucose-6-phosphate isomerase activity [GO:0004347]	cytoplasm [GO:0005737]; glucose-6-phosphate isomerase activity [GO:0004347]; gluconeogenesis [GO:0006094]; glycolytic process [GO:0006096]	27	27	27	60,8	58,356	0	323,31	12969000000	388		0,10604	0,987347		0,029737269	0,991191391	-0,007965088		0,02000983	0,984018018	0,004971695		0,323761969	0,789636877	0,064016724		0,080299911	0,944006334	0,018640518		0,522532169	0,614777459	0,082359695	9	10	10	11	12	8	12	14	15
26	P54205	Ribulose bisphosphate carboxylase large chain (RuBisCO large subunit) (EC 4.1.1.39)	cbbL rbcL slr0009	1	photorespiration [GO:0009853]; reductive pentose-phosphate cycle [GO:0019253]		magnesium ion binding [GO:0000287]; monooxygenase activity [GO:0004497]; ribulose-bisphosphate carboxylase activity [GO:0016984]	magnesium ion binding [GO:0000287]; monooxygenase activity [GO:0004497]; ribulose-bisphosphate carboxylase activity [GO:0016984]; photorespiration [GO:0009853]; reductive pentose-phosphate cycle [GO:0019253]	47	47	47	71,9	52,49	0	323,31	565220000000	1919		0,109139	0,890792		0,180750085	0,954168574	0,081433105		0,425692109	0,572281818	0,169683838		0,57875647	0,516871795	0,210930634		0,725520328	0,446933735	0,207752228		0,43337548	0,542708995	0,154019928	45	65	56	53	65	49	60	64	50
27	P54206	Ribulose bisphosphate carboxylase small chain (RuBisCO small subunit) (EC 4.1.1.39)	cbbS rbcS slr0012	1	reductive pentose-phosphate cycle [GO:0019253]		monooxygenase activity [GO:0004497]; ribulose-bisphosphate carboxylase activity [GO:0016984]	monooxygenase activity [GO:0004497]; ribulose-bisphosphate carboxylase activity [GO:0016984]; reductive pentose-phosphate cycle [GO:0019253]	11	11	11	72,6	13,239	0	323,31	210630000000	584		0,191318	0,97014		0,601947311	0,943364764	-0,061291885		1,25737068	0,47814902	-0,114294815		0,186238699	0,869466317	-0,047959137		0,184741643	0,888541455	-0,032571793		1,060408451	0,418367059	-0,12461319	14	16	20	20	23	17	17	17	18
28	P54224	Uroporphyrinogen decarboxylase (UPD) (URO-D) (EC 4.1.1.37)	hemE slr0536	1	heme biosynthetic process [GO:0006783]; protoporphyrinogen IX biosynthetic process [GO:0006782]	cytosol [GO:0005829]	uroporphyrinogen decarboxylase activity [GO:0004853]	cytosol [GO:0005829]; uroporphyrinogen decarboxylase activity [GO:0004853]; heme biosynthetic process [GO:0006783]; protoporphyrinogen IX biosynthetic process [GO:0006782]	21	21	21	72	39,152	0	323,31	27085000000	449		0,369028	0,810162		0,373609861	0,938732673	0,116070557		0,731378482	0,4172	0,21126442		0,721660763	0,442352554	0,239837646		0,420354303	0,651444934	0,120678711		0,471385691	0,552580982	0,130983353	11	13	14	13	17	11	14	16	13
29	P54225	Ferrochelatase (EC 4.99.1.1) (Heme synthase) (Protoheme ferro-lyase)	hemH slr0839	1	heme biosynthetic process [GO:0006783]	cytoplasm [GO:0005737]	ferrochelatase activity [GO:0004325]; metal ion binding [GO:0046872]	cytoplasm [GO:0005737]; ferrochelatase activity [GO:0004325]; metal ion binding [GO:0046872]; heme biosynthetic process [GO:0006783]	11	11	11	39,5	43,924	0	323,31	2865900000	198		0,216588	0,854712		0,231477421	0,937253731	-0,104054642		0,42567127	0,602061269	-0,139279175		0,044206939	0,966574785	0,020474625		0,392523105	0,64860177	-0,133270645		0,591667757	0,437210162	-0,182408905	5	6	6	6	7	7	6	10	5
30	P54261	Aminomethyltransferase (EC 2.1.2.10) (Glycine cleavage system T protein)	gcvT sll0171	1	glycine catabolic process [GO:0006546]		aminomethyltransferase activity [GO:0004047]; transaminase activity [GO:0008483]	aminomethyltransferase activity [GO:0004047]; transaminase activity [GO:0008483]; glycine catabolic process [GO:0006546]	10	10	10	29,3	41,036	0	52,478	1157400000	55		0,13024	0,869227		0,051678922	0,98911895	-0,028372955		0,626576753	0,451268226	-0,215982056		0,463978046	0,586445247	-0,168644714		0,16929387	0,845469027	-0,061493683		0,410860059	0,557409326	-0,148434067	2	1	2	0	1	1	2	0	0
31	P54384	3-isopropylmalate dehydratase large subunit (EC 4.2.1.33) (Alpha-IPM isomerase) (IPMI) (Isopropylmalate isomerase)	leuC sll1470	1	leucine biosynthetic process [GO:0009098]		3-isopropylmalate dehydratase activity [GO:0003861]; 4 iron, 4 sulfur cluster binding [GO:0051539]; metal ion binding [GO:0046872]	3-isopropylmalate dehydratase activity [GO:0003861]; 4 iron, 4 sulfur cluster binding [GO:0051539]; metal ion binding [GO:0046872]; leucine biosynthetic process [GO:0009098]	19	19	19	53,6	50,458	0	251,76	4674200000	284		0,182094	0,970288		0,271479191	0,944205689	-0,068003082		0,026081567	0,982472892	0,005106354		0,136973978	0,932486928	-0,022763824		0,108081606	0,933870968	-0,021261597		0,957840189	0,447155963	-0,120009613	8	9	11	10	8	12	11	8	11
32	P54691	Probable branched-chain-amino-acid aminotransferase (BCAT) (EC 2.6.1.42)	ilvE slr0032	1	isoleucine biosynthetic process [GO:0009097]; leucine biosynthetic process [GO:0009098]; valine biosynthetic process [GO:0009099]		L-isoleucine transaminase activity [GO:0052656]; L-leucine transaminase activity [GO:0052654]; L-valine transaminase activity [GO:0052655]	L-isoleucine transaminase activity [GO:0052656]; L-leucine transaminase activity [GO:0052654]; L-valine transaminase activity [GO:0052655]; isoleucine biosynthetic process [GO:0009097]; leucine biosynthetic process [GO:0009098]; valine biosynthetic process [GO:0009099]	24	24	24	82,6	33,951	0	323,31	11711000000	578		0,170361	0,954344		0,031957275	0,988806178	0,009618759		0,242418737	0,778657168	0,062565613		0,01774105	0,990293051	0,00631752		0,008345883	0,993139881	0,002771378		0,5156478	0,528081023	0,135500717	18	18	19	12	18	20	20	18	20
33	P54902	Gamma-glutamyl phosphate reductase 1 (GPR 1) (EC 1.2.1.41) (Glutamate-5-semialdehyde dehydrogenase 1) (Glutamyl-gamma-semialdehyde dehydrogenase 1) (GSA dehydrogenase 1)	proA1 proA sll0373	1	L-proline biosynthetic process [GO:0055129]	cytoplasm [GO:0005737]	glutamate-5-semialdehyde dehydrogenase activity [GO:0004350]; NADP binding [GO:0050661]	cytoplasm [GO:0005737]; glutamate-5-semialdehyde dehydrogenase activity [GO:0004350]; NADP binding [GO:0050661]; L-proline biosynthetic process [GO:0055129]	15	15	15	41,3	46,349	0	87,297	2497000000	179		0,460726	0,801464		0,326834466	0,943200986	-0,087910843		0,341913413	0,693641528	0,09343338		0,043431885	0,971457627	0,011907578		0,350424217	0,734537074	0,084261322		0,949411797	0,396412121	0,143926239	4	4	2	3	5	6	6	5	2
34	P55037	Ferredoxin-dependent glutamate synthase 1 (EC 1.4.7.1) (Fd-GOGAT)	gltB sll1502	1	ammonia assimilation cycle [GO:0019676]; glutamate biosynthetic process [GO:0006537]; L-glutamate biosynthetic process [GO:0097054]	cytoplasm [GO:0005737]	3 iron, 4 sulfur cluster binding [GO:0051538]; glutamate synthase (ferredoxin) activity [GO:0016041]; glutamate synthase activity [GO:0015930]; metal ion binding [GO:0046872]	cytoplasm [GO:0005737]; 3 iron, 4 sulfur cluster binding [GO:0051538]; glutamate synthase (ferredoxin) activity [GO:0016041]; glutamate synthase activity [GO:0015930]; metal ion binding [GO:0046872]; ammonia assimilation cycle [GO:0019676]; glutamate biosynthetic process [GO:0006537]; L-glutamate biosynthetic process [GO:0097054]	63	61	61	51,1	169,07	0	323,31	21173000000	1017		0,0737428	0,989833		0,026800307	0,992683525	0,007252502		0,063708116	0,948892041	-0,018874741		0,014127529	0,996783784	0,003170013		0,257799297	0,825745654	-0,05422821		0,417880306	0,621888152	-0,092395782	33	29	27	32	26	28	35	32	32
35	P55038	Ferredoxin-dependent glutamate synthase 2 (EC 1.4.7.1) (FD-GOGAT)	gltS sll1499	1	ammonia assimilation cycle [GO:0019676]; glutamate biosynthetic process [GO:0006537]; L-glutamate biosynthetic process [GO:0097054]	cytoplasm [GO:0005737]	3 iron, 4 sulfur cluster binding [GO:0051538]; glutamate synthase (ferredoxin) activity [GO:0016041]; glutamate synthase activity [GO:0015930]; metal ion binding [GO:0046872]	cytoplasm [GO:0005737]; 3 iron, 4 sulfur cluster binding [GO:0051538]; glutamate synthase (ferredoxin) activity [GO:0016041]; glutamate synthase activity [GO:0015930]; metal ion binding [GO:0046872]; ammonia assimilation cycle [GO:0019676]; glutamate biosynthetic process [GO:0006537]; L-glutamate biosynthetic process [GO:0097054]	63	63	61	48,5	169,5	0	323,31	19457000000	1119		0,118798	0,987801		0,018349249	0,995634717	0,003898239		0,234665692	0,835358909	0,039235306		0,257429572	0,834319206	0,052581406		0,194239798	0,876708298	0,036235428		0,625066548	0,536993631	0,111377335	32	38	34	28	27	31	41	35	29
36	P72585	GDP-L-fucose synthase (EC 1.1.1.271) (GDP-4-keto-6-deoxy-D-mannose-3,5-epimerase-4-reductase)	fcl sll1213	1	'de novo' GDP-L-fucose biosynthetic process [GO:0042351]		GDP-L-fucose synthase activity [GO:0050577]; isomerase activity [GO:0016853]; NADP+ binding [GO:0070401]	GDP-L-fucose synthase activity [GO:0050577]; isomerase activity [GO:0016853]; NADP+ binding [GO:0070401]; 'de novo' GDP-L-fucose biosynthetic process [GO:0042351]	15	15	15	56,7	34,719	0	323,31	7307100000	326		0,128352	0,985583		0,609020001	0,935393189	-0,094913864		0,272722544	0,77567325	-0,059519196		0,58594727	0,601592462	-0,12198143		0,220036798	0,867510061	-0,039825439		0,21830465	0,805862595	-0,046263885	7	10	10	9	10	7	13	13	8
37	P72586	GDP-mannose 4,6-dehydratase (EC 4.2.1.47) (GDP-D-mannose dehydratase)	rfbD gmd	1	GDP-mannose metabolic process [GO:0019673]		GDP-mannose 4,6-dehydratase activity [GO:0008446]; NADP+ binding [GO:0070401]	GDP-mannose 4,6-dehydratase activity [GO:0008446]; NADP+ binding [GO:0070401]; GDP-mannose metabolic process [GO:0019673]	20	20	20	62,2	41,333	0	323,31	10291000000	349		0,272492	0,985616		0,155938532	0,964440241	0,024120331		0,222452995	0,832740614	-0,041252518		0,525197664	0,720936788	-0,075912476		0,119429699	0,933927243	-0,020450974		0,162570173	0,875086817	0,025995636	7	14	7	8	11	7	17	13	9
38	P72587	Biosynthetic arginine decarboxylase 2 (ADC 2) (EC 4.1.1.19)	speA2 speA slr1312	1	arginine catabolic process [GO:0006527]; spermidine biosynthetic process [GO:0008295]		arginine decarboxylase activity [GO:0008792]; metal ion binding [GO:0046872]	arginine decarboxylase activity [GO:0008792]; metal ion binding [GO:0046872]; arginine catabolic process [GO:0006527]; spermidine biosynthetic process [GO:0008295]	16	16	16	31,1	74,476	0	114,66	1405600000	151		0,629072	0,346182		0,439784193	1	0,42755661		0,799627897	0,252765133	0,642121124		0,959013054	0,291411255	0,727807236		0,548175657	0,412899174	0,462406921		0,299293435	0,555427386	0,294146729	1	5	1	2	5	3	6	6	1
39	P72617	Sll1399 protein	sll1399	1					9	9	9	23,9	46,195	0	13,34	759410000	43		0,449278	0,364106		0,122745524	0,961104693	-0,045478821		0,515342311	0,376152381	-0,664467621		0,03604992	0,972716049	0,014770889		0,135870184	0,867957968	-0,064995575		1,290701241	0,085530516	-0,487122345	1	1	2	3	1	1	1	2	2
40	P72621	dTDP-4-dehydrorhamnose reductase (EC 1.1.1.133)	rfbD	1	dTDP-rhamnose biosynthetic process [GO:0019305]		dTDP-4-dehydrorhamnose reductase activity [GO:0008831]	dTDP-4-dehydrorhamnose reductase activity [GO:0008831]; dTDP-rhamnose biosynthetic process [GO:0019305]	6	6	6	32,9	30,249	0	48,589	361930000	66		0,259267	0,460405		0,001795514	0,998241303	0,001626205		0,011187472	0,98768839	0,00691185		0,155975724	0,839154879	0,088550186		0,197069339	0,775025048	-0,131147766		0,438853819	0,365224592	-0,702534866	1	2	1	2	2	2	3	3	0
41	P72625	Slr1501 protein	slr1501	1			N-acetyltransferase activity [GO:0008080]	N-acetyltransferase activity [GO:0008080]	2	2	2	8,9	24,988	0	14,797	348350000	45		0,138888	0,514042		0,211383803	0,928753548	-0,282907867		0,583533317	0,358588235	0,518506622		0,181253241	0,748171657	-0,389321136		0,147295009	0,796404537	-0,24546051		0,151665094	0,720098853	0,260955048	1	1	1	1	2	1	2	1	1
42	P72631	Sll1064 protein	sll1064	1			acid phosphatase activity [GO:0003993]; metal ion binding [GO:0046872]	acid phosphatase activity [GO:0003993]; metal ion binding [GO:0046872]	4	4	4	9,3	64,733	0	7,0704	222150000	33		0,568951	0,332202		0,954890375	1	0,841604614		0,616069586	0,326676417	0,623712921		1,05269071	0,290753247	0,852698898		0,48740994	0,436208531	0,553219223		0,742113705	0,184732203	0,68493309	2	1	0	2	0	1	1	0	1
43	P72635	Sll1062 protein	sll1062	1					3	3	3	32	14,606	0	11,379	83129000	9		1,33037	0,20498		1,087129364	1	-0,75786171		1,459752414	0,136814815	-1,248592758		0,328313758	0,593489917	-0,333689117		0,168046685	0,796846081	0,142412949		0,037737641	0,942262595	-0,021470642	0	0	0	0	0	0	0	0	0
44	P72641	Adenylate kinase 2 (AK 2) (EC 2.7.4.3) (ATP-AMP transphosphorylase 2) (ATP:AMP phosphotransferase 2) (Adenylate monophosphate kinase 2)	adk2 sll1059	1	AMP salvage [GO:0044209]	cytoplasm [GO:0005737]	adenylate kinase activity [GO:0004017]; ATP binding [GO:0005524]	cytoplasm [GO:0005737]; adenylate kinase activity [GO:0004017]; ATP binding [GO:0005524]; AMP salvage [GO:0044209]	5	5	5	40,3	20,34	0	16,473	301350000	39		0,239924	0,454629		0,427987813	1	-0,421440887		0,790070091	0,260496614	-0,572789001		0,809236958	0,328484848	-0,64949646		1,130650346	0,255695652	-0,434534073		0,897425662	0,108378947	-0,965398407	2	4	1	1	1	1	0	1	1
45	P72644	Phosphoribosylformylglycinamidine synthase subunit PurL (FGAM synthase) (EC 6.3.5.3) (Formylglycinamide ribonucleotide amidotransferase subunit II) (FGAR amidotransferase II) (FGAR-AT II) (Glutamine amidotransferase PurL) (Phosphoribosylformylglycinamidine synthase subunit II)	purL sll1056	1	'de novo' IMP biosynthetic process [GO:0006189]	cytoplasm [GO:0005737]	ATP binding [GO:0005524]; metal ion binding [GO:0046872]; phosphoribosylformylglycinamidine synthase activity [GO:0004642]	cytoplasm [GO:0005737]; ATP binding [GO:0005524]; metal ion binding [GO:0046872]; phosphoribosylformylglycinamidine synthase activity [GO:0004642]; 'de novo' IMP biosynthetic process [GO:0006189]	22	22	22	43,9	81,831	0	323,31	7940000000	431		0,214149	0,973249		0,429141669	0,931239892	-0,091916275		0,939962728	0,483849351	-0,129701614		0,466175625	0,733576375	-0,075690842		1,052590618	0,517298013	-0,116565704		0,411493431	0,682208145	-0,066966248	11	17	14	13	12	14	16	16	10
46	P72647	Sll1053 protein	sll1053	1	protein secretion [GO:0009306]; transmembrane transport [GO:0055085]	integral component of membrane [GO:0016021]	transporter activity [GO:0005215]	integral component of membrane [GO:0016021]; transporter activity [GO:0005215]; protein secretion [GO:0009306]; transmembrane transport [GO:0055085]	18	18	18	56,2	56,258	0	323,31	1954700000	248		0,177353	0,74199		0,310729257	0,927903485	-0,12954216		0,26841348	0,718878469	-0,101157379		0,10615587	0,908384486	-0,049848175		0,036992239	0,961545595	0,019411087		0,42042737	0,501359563	0,209720612	8	10	12	5	6	6	9	6	9
47	P72648	Guanylate kinase (EC 2.7.4.8) (GMP kinase)	gmk slr1123	1		cytosol [GO:0005829]	ATP binding [GO:0005524]; guanylate kinase activity [GO:0004385]	cytosol [GO:0005829]; ATP binding [GO:0005524]; guanylate kinase activity [GO:0004385]	6	6	6	39,3	21,427	0	38,53	478740000	41		0,193501	0,792973		0,521130414	0,982063636	0,201026535		0,445510915	0,568141391	0,162747192		0,793364911	0,397552581	0,287842941		0,623567131	0,470879536	0,223411942		0,571332774	0,385328413	0,258396149	0	1	0	0	0	3	3	0	0
48	P72649	Phosphoglycerate mutase	gpmB	1	metabolic process [GO:0008152]		catalytic activity [GO:0003824]	catalytic activity [GO:0003824]; metabolic process [GO:0008152]	6	6	6	28,9	38,881	0	75,683	836000000	71		0,146356	0,550483		0,070779187	0,965222318	-0,062232208		0,43289268	0,466969292	-0,423388672		0,460459545	0,451053485	-0,748452377		0,499546602	0,457660266	-0,376285553		0,212325666	0,657402405	-0,207168198	1	2	3	2	3	0	2	2	3
49	P72650	Zeaxanthin glucosyl transferase	crtX	1	antibiotic metabolic process [GO:0016999]	intracellular membrane-bounded organelle [GO:0043231]	transferase activity, transferring hexosyl groups [GO:0016758]; UDP-glycosyltransferase activity [GO:0008194]	intracellular membrane-bounded organelle [GO:0043231]; transferase activity, transferring hexosyl groups [GO:0016758]; UDP-glycosyltransferase activity [GO:0008194]; antibiotic metabolic process [GO:0016999]	6	6	6	24,3	45,33	0	11,546	140810000	24		0,168618	0,554714		0,276938532	0,93246395	0,327833939		0,655916862	0,321910112	0,537541199		0,046304897	0,945857486	0,078154755		0,22684146	0,69595829	0,271320343		0,819168994	0,163364286	0,622740936	0	0	2	0	1	0	1	0	0
50	P72655	Uncharacterized protein slr1128	slr1128	1		integral component of membrane [GO:0016021]		integral component of membrane [GO:0016021]	23	23	23	74,5	35,727	0	323,31	13416000000	401		1,1461	0,252815		0,47200888	1	-0,294612503		1,49888407	0,153165049	-0,6617836		1,169265356	0,299888889	-0,82743988		1,273091573	0,214810811	-0,655228806		1,499205353	0,05224918	-0,629655457	16	15	18	15	12	12	18	15	13
51	P72656	Ribonuclease E/G-like protein (RNase E/G-like protein) (EC 3.1.26.-)	rne slr1129	1	rRNA processing [GO:0006364]	cytoplasm [GO:0005737]	endonuclease activity [GO:0004519]; metal ion binding [GO:0046872]; ribonuclease activity [GO:0004540]; RNA binding [GO:0003723]	cytoplasm [GO:0005737]; endonuclease activity [GO:0004519]; metal ion binding [GO:0046872]; ribonuclease activity [GO:0004540]; RNA binding [GO:0003723]; rRNA processing [GO:0006364]	32	32	32	59,2	74,944	0	323,31	10014000000	528		0,569592	0,729228		0,276678092	0,932019048	-0,097356033		0,21066538	0,78370922	-0,068793488		0,407792295	0,66946696	-0,123099518		0,307581333	0,740135055	-0,090791321		0,393318621	0,577468405	0,133637619	12	11	15	13	17	16	15	14	16
52	P72658	Mutator MutT protein	mutT	1	DNA repair [GO:0006281]		8-oxo-7,8-dihydroguanosine triphosphate pyrophosphatase activity [GO:0008413]	8-oxo-7,8-dihydroguanosine triphosphate pyrophosphatase activity [GO:0008413]; DNA repair [GO:0006281]	4	4	4	32,4	15,152	0	13,211	273310000	47		0,0721144	0,746877		0,016992364	0,991665131	0,021051407		0,153560082	0,771789474	0,167278671		0,23182405	0,734303154	0,180780411		0,375638734	0,573210526	0,249066162		0,204389348	0,667801105	-0,205305099	1	2	2	1	1	1	2	2	1
53	P72662	Cysteine synthase	cysM	1	cysteine biosynthetic process from serine [GO:0006535]	cytoplasm [GO:0005737]	pyridoxal phosphate binding [GO:0030170]	cytoplasm [GO:0005737]; pyridoxal phosphate binding [GO:0030170]; cysteine biosynthetic process from serine [GO:0006535]	13	13	13	50,8	34,734	0	148,33	2834200000	206		0,904208	0,454566		0,591170166	1	-0,282261658		1,063328127	0,229675393	-0,399734497		1,26642919	0,29393617	-0,454860306		1,075588918	0,271688312	-0,411304092		0,88123632	0,20943949	-0,357320786	5	9	7	5	7	3	6	8	3
54	P72663	4-diphosphocytidyl-2-C-methyl-D-erythritol kinase (CMK) (EC 2.7.1.148) (4-(cytidine-5'-diphospho)-2-C-methyl-D-erythritol kinase)	ispE sll0711	1	isopentenyl diphosphate biosynthetic process, methylerythritol 4-phosphate pathway [GO:0019288]; terpenoid biosynthetic process [GO:0016114]		4-(cytidine 5'-diphospho)-2-C-methyl-D-erythritol kinase activity [GO:0050515]; ATP binding [GO:0005524]	4-(cytidine 5'-diphospho)-2-C-methyl-D-erythritol kinase activity [GO:0050515]; ATP binding [GO:0005524]; isopentenyl diphosphate biosynthetic process, methylerythritol 4-phosphate pathway [GO:0019288]; terpenoid biosynthetic process [GO:0016114]	5	5	5	20,6	34,08	0	35,927	333220000	44		0,0523213	0,700915		0,819786856	1	0,575029373		0,073396529	0,878537387	-0,12443924		0,000839692	1	-0,001575851		0,064906028	0,906041152	-0,134511566		0,084680053	0,846787479	-0,136175156	1	1	1	1	2	2	2	2	2
55	P72673	Thylakoid-associated protein slr0729	slr0729	1		thylakoid membrane [GO:0042651]		thylakoid membrane [GO:0042651]	5	5	5	80,2	10,946	0	80,759	451900000	57		0,478397	0,329583		0,025365225	0,989558523	0,034981918		0,195806111	0,713626923	-0,216585159		0,000607597	1	0,000924683		0,478035237	0,456896142	-0,437694931		1,04287404	0,081548694	-0,881541061	0	5	1	3	0	2	4	3	1
56	P72675	Slr0731 protein	slr0731	1					18	18	18	44,5	44,716	0	323,31	6657300000	297		0,959151	0,670124		1,231109047	1	-0,230499268		1,225598329	0,255926773	-0,27736702		1,193068909	0,355727059	-0,241799545		0,60001848	0,544308081	-0,152532959		1,065459955	0,254850508	-0,223019791	9	16	9	9	9	10	16	12	7
57	P72687	Ribosome maturation factor RimP	rimP slr0742	1	ribosomal small subunit assembly [GO:0000028]; translation [GO:0006412]	cytosol [GO:0005829]		cytosol [GO:0005829]; ribosomal small subunit assembly [GO:0000028]; translation [GO:0006412]	3	3	3	25,8	16,559	0	186,55	278360000	30		0,733695	0,248469		0,324865904	0,958661448	0,479735184		1,371291315	0,157888889	1,107766342		1,227763913	0,306193548	1,182328415		1,00800206	0,2188125	1,024452591		0,854136406	0,117120968	1,005875397	0	1	0	0	1	1	0	1	0
58	P72705	Photosystem I assembly protein Ycf4	ycf4 sll0226	1	photosynthesis [GO:0015979]	integral component of membrane [GO:0016021]; photosystem I [GO:0009522]; thylakoid membrane [GO:0042651]		integral component of membrane [GO:0016021]; photosystem I [GO:0009522]; thylakoid membrane [GO:0042651]; photosynthesis [GO:0015979]	8	8	8	36,2	20,453	0	323,31	45728000000	195		0,0704615	0,975439		0,112705456	0,962058771	-0,044290924		0,511431282	0,596468508	-0,119793701		0,711333651	0,552728682	-0,134337997		0,177773875	0,878041237	-0,039195251		0,328952668	0,669095588	-0,087003326	5	7	5	8	6	8	5	9	6
59	P72710	ABC transporter	slr0251	1	transmembrane transport [GO:0055085]	ATP-binding cassette (ABC) transporter complex [GO:0043190]	ATPase activity [GO:0016887]; ATP binding [GO:0005524]	ATP-binding cassette (ABC) transporter complex [GO:0043190]; ATP binding [GO:0005524]; ATPase activity [GO:0016887]; transmembrane transport [GO:0055085]	8	8	8	42,9	27,861	0	70,048	732320000	75		0,248095	0,895423		0,055183987	0,991582524	0,01785965		0,094114413	0,913099434	-0,029454041		0,615087068	0,563424968	0,142564392		0,017231973	0,984485305	0,007574463		0,395102701	0,606750973	0,109580231	1	2	1	1	3	2	3	3	2
60	P72720	Glutamine--fructose-6-phosphate aminotransferase [isomerizing] (EC 2.6.1.16) (D-fructose-6-phosphate amidotransferase) (GFAT) (Glucosamine-6-phosphate synthase) (Hexosephosphate aminotransferase) (L-glutamine--D-fructose-6-phosphate amidotransferase)	glmS sll0220	1	fructose 6-phosphate metabolic process [GO:0006002]; glutamine metabolic process [GO:0006541]; protein N-linked glycosylation [GO:0006487]; UDP-N-acetylglucosamine metabolic process [GO:0006047]	cytosol [GO:0005829]	carbohydrate derivative binding [GO:0097367]; glutamine-fructose-6-phosphate transaminase (isomerizing) activity [GO:0004360]	cytosol [GO:0005829]; carbohydrate derivative binding [GO:0097367]; glutamine-fructose-6-phosphate transaminase (isomerizing) activity [GO:0004360]; fructose 6-phosphate metabolic process [GO:0006002]; glutamine metabolic process [GO:0006541]; protein N-linked glycosylation [GO:0006487]; UDP-N-acetylglucosamine metabolic process [GO:0006047]	14	14	14	26,8	69,606	0	171,82	2556100000	174		0,519288	0,697322		0,187147849	0,954039874	-0,081420898		0,80149057	0,370972358	-0,246783447		0,879691399	0,380404858	-0,278345108		0,72555563	0,438925	-0,222067642		0,414506415	0,575576613	-0,128052521	4	7	4	4	4	7	6	7	4
61	P72728	Sensory transduction histidine kinase	slr1414	1		intracellular [GO:0005622]	ATP binding [GO:0005524]; phosphorelay sensor kinase activity [GO:0000155]	intracellular [GO:0005622]; ATP binding [GO:0005524]; phosphorelay sensor kinase activity [GO:0000155]	8	8	8	27,9	47,992	0	25,488	755720000	93		0,525317	0,654908		0,350466614	0,935945865	-0,151780319		0,635235582	0,4364	-0,230086136		0,816236799	0,399723881	-0,267295074		0,825324591	0,384282609	-0,259816742		1,295742263	0,128317829	-0,337919235	4	3	2	2	0	4	4	2	2
62	P72730	MorR protein	morR	1		cell wall [GO:0005618]	ATPase activity [GO:0016887]; ATP binding [GO:0005524]	cell wall [GO:0005618]; ATP binding [GO:0005524]; ATPase activity [GO:0016887]	9	9	9	36,9	35,091	0	146,21	1149200000	157		0,384922	0,842779		0,511666844	0,959260952	-0,15273819		0,91340828	0,3747136	-0,208245087		0,818939091	0,459438596	-0,191730118		0,851445282	0,452460389	-0,173844528		0,717041625	0,403156627	-0,175750732	3	7	4	3	5	4	9	5	3
63	P72738	Sll1039 protein	sll1039	1					5	5	5	18,7	43,883	0	8,8446	372660000	17		0,436334	0,342398		0,178550794	0,930557225	0,220816422		0,345868089	0,543699177	0,351544952		0,442895194	0,496752533	0,427114868		0,520856079	0,424419355	0,486817932		0,228161614	0,60672407	-0,413435745	1	1	1	0	1	0	1	0	1
64	P72740	Dihydrolipoyl dehydrogenase (EC 1.8.1.4) (Dihydrolipoamide dehydrogenase) (LPD) (E3 component of pyruvate complex)	lpdA pdhD slr1096	1	cell redox homeostasis [GO:0045454]; glycolytic process [GO:0006096]	plasma membrane [GO:0005886]	dihydrolipoyl dehydrogenase activity [GO:0004148]; electron transfer activity [GO:0009055]; flavin adenine dinucleotide binding [GO:0050660]	plasma membrane [GO:0005886]; dihydrolipoyl dehydrogenase activity [GO:0004148]; electron transfer activity [GO:0009055]; flavin adenine dinucleotide binding [GO:0050660]; cell redox homeostasis [GO:0045454]; glycolytic process [GO:0006096]	24	24	24	52,7	50,832	0	323,31	20842000000	511		0,228071	0,926715		0,314408094	0,933509615	-0,086912918		0,432523012	0,633129167	-0,109594345		0,787826527	0,490801187	-0,169432831		0,447493932	0,649201774	-0,115901566		0,592334817	0,470171946	-0,157794189	11	19	16	18	16	13	18	22	14
65	P72742	Slr1098 protein	slr1098	1	iron-sulfur cluster assembly [GO:0016226]			iron-sulfur cluster assembly [GO:0016226]	6	6	6	28,6	27,675	0	26,057	437980000	108		0,18382	0,925481		0,736562841	0,970385542	-0,120000076		0,090557892	0,931584665	-0,021218491		0,287075987	0,765545894	-0,085883331		1,098303359	0,44286758	-0,149991608		0,589394745	0,494947137	-0,140778732	2	3	4	5	4	1	5	4	4
66	P72746	Slr1102 protein	slr1102	1					17	17	17	22,3	96,638	0	100,98	2163100000	181		0,122378	0,98108		0,023292655	0,992774487	-0,005316544		0,389706632	0,750842105	-0,060596848		0,107683169	0,93076292	-0,028512192		0,174194492	0,879765719	-0,040009689		0,453281242	0,667466421	0,069374084	4	6	5	6	5	8	6	5	5
67	P72748	Slr1104 protein	slr1104	1					13	13	13	26,9	69,333	0	256,74	2435200000	185		0,847109	0,466042		0,489219992	1	-0,24507637		0,717734529	0,346464223	-0,345368576		1,14534091	0,290789474	-0,47653389		0,811650832	0,32886918	-0,39390831		0,713554221	0,283334282	-0,333282089	5	3	7	5	2	4	10	5	5
68	P72756	Sll1033 protein	sll1033	1			protein serine/threonine phosphatase activity [GO:0004722]	protein serine/threonine phosphatase activity [GO:0004722]	14	14	14	25,4	73,711	0	323,31	5453500000	244		0,229025	0,889698		0,190784966	0,957873112	0,060918427		0,376248174	0,692019646	0,086937332		0,205236229	0,859720848	0,049420547		0,213416965	0,831869683	-0,058890533		0,449953847	0,610942085	-0,094417572	8	8	6	5	11	6	10	6	7
69	P72757	CcmN protein	ccmN	1					2	2	2	15,4	25,057	0	55,702	376690000	67		0,319126	0,505843		0,480765991	1	-0,329909897		0,241176192	0,679416583	-0,192617416		0,68081903	0,358152425	-0,63923912		0,542140692	0,441448916	-0,360943604		0,231414945	0,635684507	-0,209647369	2	3	2	3	2	3	2	3	3
70	P72758	Carbon dioxide concentrating mechanism protein CcmM	ccmM	1					41	41	41	58,4	73,12	0	323,31	158880000000	1252		0,204569	0,796737		0,472279511	0,954864564	-0,161113739		0,391124135	0,633172775	-0,123031616		0,564223163	0,538850331	-0,18079071		0,189766733	0,826364964	-0,072102737		0,146257849	0,803031436	0,07514267	33	41	43	43	44	37	38	41	42
71	P72759	Carbon dioxide concentrating mechanism protein CcmL	ccmL sll1030	1					4	4	4	46	10,638	0	23,64	615690000	43		0,36524	0,827926		0,170183813	0,956292135	-0,044234848		0,397498098	0,691643137	0,082902145		0,499519685	0,593928571	0,147589111		0,023505205	0,97931567	-0,008798218		0,24181941	0,756912097	-0,062410736	3	2	2	1	1	2	1	0	0
72	P72762	NADH-glutamate synthase small subunit	gltD	1	glutamate biosynthetic process [GO:0006537]		iron-sulfur cluster binding [GO:0051536]; oxidoreductase activity, acting on the CH-NH2 group of donors, NAD or NADP as acceptor [GO:0016639]	iron-sulfur cluster binding [GO:0051536]; oxidoreductase activity, acting on the CH-NH2 group of donors, NAD or NADP as acceptor [GO:0016639]; glutamate biosynthetic process [GO:0006537]	20	20	20	53,6	54,144	0	323,31	6979400000	330		0,031136	0,999568		0,415071391	0,94032287	0,05642128		0,187856677	0,862229617	0,033274841		0,15227567	0,931226863	-0,022175598		0,208898281	0,873991372	0,036934662		0,131296848	0,881467949	0,027585602	8	9	11	8	12	10	9	10	9
73	P72765	Slr1772 protein	slr1772	1		integral component of membrane [GO:0016021]; outer membrane-bounded periplasmic space [GO:0030288]		integral component of membrane [GO:0016021]; outer membrane-bounded periplasmic space [GO:0030288]	3	3	3	13	41,664	0	25,873	231790000	55		0,593214	0,363851		0,371520579	0,935877907	-0,126795959		0,801589393	0,24240404	-0,720491791		1,551058058	0,299902439	-0,426205063		0,887051207	0,337045356	-0,320227432		1,163139015	0,128309478	-0,390706635	2	1	2	1	0	0	3	2	2
74	P72776	Pyridoxine 5'-phosphate synthase (PNP synthase) (EC 2.6.99.2)	pdxJ slr1779	1	pyridoxine biosynthetic process [GO:0008615]	cytosol [GO:0005829]	pyridoxine 5'-phosphate synthase activity [GO:0033856]	cytosol [GO:0005829]; pyridoxine 5'-phosphate synthase activity [GO:0033856]; pyridoxine biosynthetic process [GO:0008615]	10	10	10	58,3	26,518	0	95,369	2130300000	69		0,115268	0,744114		0,257975067	0,930132626	0,17339325		0,509438442	0,435553041	0,355124664		0,453094921	0,527606648	0,300055313		0,109021524	0,86749782	0,103590775		0,472387711	0,416260973	0,306710434	1	3	2	2	2	2	2	1	2
75	P72777	Ycf54-like protein	slr1780	1					8	8	8	65,4	15,456	0	166,82	4846500000	145		0,785673	0,621522		0,256340632	0,934763218	0,091839218		1,456227852	0,214114114	0,304407883		1,164372855	0,338413043	0,28563118		0,485833159	0,577233333	0,156669998		0,690957537	0,416421801	0,17132988	4	6	5	3	3	4	6	5	3
76	P72780	Putative serine protease HhoA	hhoA sll1679	1		outer membrane-bounded periplasmic space [GO:0030288]	identical protein binding [GO:0042802]; serine-type endopeptidase activity [GO:0004252]	outer membrane-bounded periplasmic space [GO:0030288]; identical protein binding [GO:0042802]; serine-type endopeptidase activity [GO:0004252]	13	13	13	40,6	41,336	0	168,1	1704400000	177		0,188186	0,838128		0,043882946	0,989411387	-0,020600891		0,304291868	0,685984158	-0,114303207		0,635794379	0,472152207	-0,2352005		0,15508801	0,838727435	-0,078987122		0,037287972	0,943896341	-0,019753647	6	5	5	5	5	4	7	7	4
77	P72781	NarL subfamily	slr1783	1	phosphorelay signal transduction system [GO:0000160]; regulation of transcription, DNA-templated [GO:0006355]; transcription, DNA-templated [GO:0006351]	intracellular [GO:0005622]	DNA binding [GO:0003677]	intracellular [GO:0005622]; DNA binding [GO:0003677]; phosphorelay signal transduction system [GO:0000160]; regulation of transcription, DNA-templated [GO:0006355]; transcription, DNA-templated [GO:0006351]	7	7	7	28,4	31,395	0	127,82	1542400000	138		0,351065	0,768802		0,112917559	0,96443547	-0,037287903		0,577048632	0,487270375	-0,195370865		0,244993106	0,827916591	-0,057744217		0,369870968	0,737196411	-0,078765488		0,928416861	0,275404011	-0,238021088	5	5	6	5	3	6	5	4	6
78	P72782	Biliverdin reductase	bvdR	1			nucleotide binding [GO:0000166]; oxidoreductase activity [GO:0016491]	nucleotide binding [GO:0000166]; oxidoreductase activity [GO:0016491]	10	10	10	36,6	36,64	0	196,21	1571700000	145		0,516879	0,729581		0,582762999	0,993455399	-0,180189514		0,70817393	0,416354651	-0,221127701		0,948456976	0,379088608	-0,264784622		0,442487273	0,604954598	-0,151939011		0,828799174	0,290571827	-0,252455902	2	6	3	5	3	5	6	5	3
79	P72788	Slr1788 protein	slr1788	1					10	10	10	32,5	41,254	0	45,64	511320000	70		0,166586	0,464491		0,381982673	1	0,812450027		0,627707889	0,29190303	0,947379303		0,372354977	0,52208427	0,722717667		0,803375565	0,257602787	1,180917358		0,648074279	0,20075817	1,028653336	4	0	0	0	1	2	8	2	0
80	P72793	UPF0093 membrane protein slr1790	slr1790	1		integral component of membrane [GO:0016021]; plasma membrane [GO:0005886]		integral component of membrane [GO:0016021]; plasma membrane [GO:0005886]	2	2	2	11,4	24,063	0	19,221	307160000	27		1,01833	0,200471		0,847635758	1	-1,279460526		0,141866748	0,771923844	0,23771019		0,04193264	0,95230303	-0,082059479		0,155928254	0,776272291	-0,302593994		1,090209721	0,071220513	0,938009644	0	1	0	1	1	1	2	1	1
81	P72794	Phosphoadenosine phosphosulfate reductase (EC 1.8.4.8) (3'-phosphoadenylylsulfate reductase) (PAPS reductase, thioredoxin dependent) (PAPS sulfotransferase) (PAdoPS reductase)	cysH slr1791	1	hydrogen sulfide biosynthetic process [GO:0070814]; sulfate assimilation, phosphoadenylyl sulfate reduction by phosphoadenylyl-sulfate reductase (thioredoxin) [GO:0019379]	cytoplasm [GO:0005737]	phosphoadenylyl-sulfate reductase (thioredoxin) activity [GO:0004604]	cytoplasm [GO:0005737]; phosphoadenylyl-sulfate reductase (thioredoxin) activity [GO:0004604]; hydrogen sulfide biosynthetic process [GO:0070814]; sulfate assimilation, phosphoadenylyl sulfate reduction by phosphoadenylyl-sulfate reductase (thioredoxin) [GO:0019379]	5	5	5	14,5	28,468	0	17,919	310910000	32		1,02219	0,236482		0,073199187	0,964216312	-0,125499344		0,858821695	0,229354497	0,660943222		0,648119912	0,377890756	0,558771515		1,059848495	0,219376884	0,798773193		1,005213355	0,096928571	0,773165131	0	2	0	0	2	0	1	1	0
82	P72797	Transaldolase (EC 2.2.1.2)	tal talB slr1793	1	carbohydrate metabolic process [GO:0005975]; pentose-phosphate shunt [GO:0006098]	cytoplasm [GO:0005737]	calcium ion binding [GO:0005509]; sedoheptulose-7-phosphate:D-glyceraldehyde-3-phosphate glyceronetransferase activity [GO:0004801]	cytoplasm [GO:0005737]; calcium ion binding [GO:0005509]; sedoheptulose-7-phosphate:D-glyceraldehyde-3-phosphate glyceronetransferase activity [GO:0004801]; carbohydrate metabolic process [GO:0005975]; pentose-phosphate shunt [GO:0006098]	29	29	29	72,6	43,105	0	323,31	25021000000	497		0,0454452	0,985383		0,19200079	0,96000796	-0,055825806		0,229733045	0,780827709	-0,064408112		0,363167344	0,685327568	-0,127246857		0,237506579	0,808235075	-0,068510056		0,007551116	0,989492228	0,002391434	15	17	18	14	16	9	16	19	15
83	P72799	Slr1794 protein	slr1794	1					14	14	14	43,9	39,139	0	323,31	4281800000	229		1,1722	0,521669		0,586518626	0,998346793	-0,180812073		0,961091511	0,316798479	-0,268061066		1,125543239	0,345100257	-0,28060112		0,552640527	0,535195929	-0,173194504		0,054628074	0,92146017	0,026893234	5	9	6	8	6	8	6	5	6
84	P72808	Prephenate dehydratase (PDT) (EC 4.2.1.51)	pheA	1	L-phenylalanine biosynthetic process [GO:0009094]	cytoplasm [GO:0005737]	chorismate mutase activity [GO:0004106]; prephenate dehydratase activity [GO:0004664]	cytoplasm [GO:0005737]; chorismate mutase activity [GO:0004106]; prephenate dehydratase activity [GO:0004664]; L-phenylalanine biosynthetic process [GO:0009094]	3	3	3	16,5	32,342	0	5,4756	203060000	47		0,127111	0,673717		0,428349343	1	-0,417897797		0,512408514	0,417684515	-0,402748108		0,599801295	0,423930676	-0,388864899		0,724325592	0,333350763	-0,493874741		0,638917374	0,269778417	-0,467967987	3	2	1	1	1	1	2	2	1
85	P72813	Slr1799 protein	slr1799	1		integral component of membrane [GO:0016021]		integral component of membrane [GO:0016021]	6	6	6	10,7	71,318	0	44,906	371990000	40		0,505537	0,514254		0,172438985	0,956976602	-0,074397659		0,546725302	0,532490476	-0,15724678		0,779506874	0,354758294	-0,454388809		0,551722293	0,531141388	-0,178741074		0,0176938	0,970912621	0,009169006	1	1	1	1	1	1	2	1	1
86	P72818	2-phytyl-1,4-naphtoquinone methyltransferase (EC 2.1.1.329) (Demethylphylloquinone methyltransferase)	menG sll1653	1	phylloquinone biosynthetic process [GO:0042372]		2-phytyl-1,4-naphthoquinone methyltransferase activity [GO:0052624]	2-phytyl-1,4-naphthoquinone methyltransferase activity [GO:0052624]; phylloquinone biosynthetic process [GO:0042372]	4	4	4	29,4	26,072	0	74,505	395050000	52		0,212485	0,539773		0,227775684	0,9313297	0,306711578		0,449367388	0,44443828	0,479505539		0,189163775	0,751563059	0,270723724		0,568427163	0,385292419	0,586426163		0,581849846	0,275135908	0,614908218	0	2	1	2	1	1	2	2	0
87	P72828	tRNA (guanine-N(1)-)-methyltransferase (EC 2.1.1.228) (M1G-methyltransferase) (tRNA [GM37] methyltransferase)	trmD sll1198	1		cytoplasm [GO:0005737]	2-C-methyl-D-erythritol 4-phosphate cytidylyltransferase activity [GO:0050518]; tRNA (guanine(37)-N(1))-methyltransferase activity [GO:0052906]; tRNA (guanine-N1-)-methyltransferase activity [GO:0009019]	cytoplasm [GO:0005737]; 2-C-methyl-D-erythritol 4-phosphate cytidylyltransferase activity [GO:0050518]; tRNA (guanine(37)-N(1))-methyltransferase activity [GO:0052906]; tRNA (guanine-N1-)-methyltransferase activity [GO:0009019]	4	4	4	25,1	25,948	0	23,945	367290000	45		0,642281	0,249762		0,022289578	0,987480844	0,061952591		0,96923062	0,170330579	1,114884949		0,98940172	0,289006452	1,10012207		0,653911672	0,322525346	0,848427582		0,739819988	0,169477798	0,865747833	0	1	0	2	1	2	2	1	2
88	P72843	Regulatory components of sensory transduction system	slr1305	1		intracellular [GO:0005622]	phosphorelay sensor kinase activity [GO:0000155]	intracellular [GO:0005622]; phosphorelay sensor kinase activity [GO:0000155]	6	6	6	10,4	96,226	0	35,405	115830000	39		0,325116	0,541556		0,073042671	0,965201732	0,068077087		0,821559504	0,29822664	0,375167847		0,477549728	0,610880562	0,142709351		0,335035468	0,627823928	0,200287628		1,740154035	0,052186667	0,491545105	0	1	0	1	1	0	4	2	0
89	P72847	Sll1186 protein	sll1186	1					5	5	5	16,2	25,117	0	17,296	179290000	24		2,29992	0,182667		0,613955446	1	0,581040573		1,419461556	0,1498	0,928808594		0,717022148	0,348746803	0,678255844		0,770328351	0,29580117	-0,783681488		0,42002868	0,416089941	-0,435131073	0	1	0	0	1	1	2	3	0
90	P72848	Oxygen-dependent coproporphyrinogen-III oxidase (CPO) (Coprogen oxidase) (Coproporphyrinogenase) (EC 1.3.3.3)	hemF sll1185	1	chlorophyll biosynthetic process [GO:0015995]; protoporphyrinogen IX biosynthetic process [GO:0006782]	cytoplasm [GO:0005737]	coproporphyrinogen oxidase activity [GO:0004109]; metal ion binding [GO:0046872]; protein homodimerization activity [GO:0042803]	cytoplasm [GO:0005737]; coproporphyrinogen oxidase activity [GO:0004109]; metal ion binding [GO:0046872]; protein homodimerization activity [GO:0042803]; chlorophyll biosynthetic process [GO:0015995]; protoporphyrinogen IX biosynthetic process [GO:0006782]	23	23	23	74,7	38,937	0	323,31	17718000000	527		1,02284	0,43		0,695958243	1	0,262551498		0,495826117	0,518184915	0,194332123		0,687665235	0,449155844	0,247003555		0,414035623	0,608013857	0,161613464		0,321061397	0,587434263	-0,170060349	13	18	17	15	20	11	16	22	18
91	P72849	Heme oxygenase 1 (EC 1.14.14.18)	pbsA1 sll1184	1	heme catabolic process [GO:0042167]; heme oxidation [GO:0006788]; iron ion homeostasis [GO:0055072]; photosynthesis [GO:0015979]; response to oxidative stress [GO:0006979]	membrane [GO:0016020]	heme binding [GO:0020037]; heme oxygenase (decyclizing) activity [GO:0004392]; metal ion binding [GO:0046872]	membrane [GO:0016020]; heme binding [GO:0020037]; heme oxygenase (decyclizing) activity [GO:0004392]; metal ion binding [GO:0046872]; heme catabolic process [GO:0042167]; heme oxidation [GO:0006788]; iron ion homeostasis [GO:0055072]; photosynthesis [GO:0015979]; response to oxidative stress [GO:0006979]	17	17	17	71,2	27,05	0	290,72	8830300000	227		0,338394	0,612102		0,315817571	0,943531756	0,093999863		0,068672938	0,914622687	0,043173599		0,368445899	0,654955157	0,154368591		0,002107873	0,998192308	0,001091385		0,551327091	0,384679803	-0,277116776	7	8	4	7	7	9	7	9	5
92	P72851	50S ribosomal protein L28	rpmB rpl28 ssr1604	1	translation [GO:0006412]	cytosolic large ribosomal subunit [GO:0022625]	structural constituent of ribosome [GO:0003735]	cytosolic large ribosomal subunit [GO:0022625]; structural constituent of ribosome [GO:0003735]; translation [GO:0006412]	7	7	7	67,9	8,9934	0	26,079	12576000000	62		0,0465946	0,867067		0,027015467	0,98755417	0,019512939		0,050377682	0,941349169	-0,034135818		0,087155017	0,913626778	-0,061798477		0,384698571	0,587388954	0,208719635		0,202064753	0,672302644	0,190101242	3	2	2	2	1	2	2	1	3
93	P72854	Sulfite reductase [ferredoxin] (EC 1.8.7.1)	sir slr0963	1	regulation of transcription, DNA-templated [GO:0006355]; sulfate reduction [GO:0019419]		4 iron, 4 sulfur cluster binding [GO:0051539]; heme binding [GO:0020037]; metal ion binding [GO:0046872]; sulfite reductase (ferredoxin) activity [GO:0050311]; sulfite reductase activity [GO:0016002]	4 iron, 4 sulfur cluster binding [GO:0051539]; heme binding [GO:0020037]; metal ion binding [GO:0046872]; sulfite reductase (ferredoxin) activity [GO:0050311]; sulfite reductase activity [GO:0016002]; regulation of transcription, DNA-templated [GO:0006355]; sulfate reduction [GO:0019419]	44	44	44	77,2	71,44	0	323,31	24029000000	811		0,501132	0,961819		0,021536823	0,995518911	0,004017639		0,473855605	0,80981913	0,035719681		0,198320485	0,904304014	-0,03159256		0,359251607	0,836507194	0,040538406		1,146831164	0,473669643	0,100944519	20	28	23	19	22	20	23	26	22
94	P72856	Beta sliding clamp (Beta clamp) (Sliding clamp) (Beta-clamp processivity factor) (DNA polymerase III beta sliding clamp subunit) (DNA polymerase III subunit beta)	dnaN slr0965	1	DNA replication [GO:0006260]	cytoplasm [GO:0005737]; DNA polymerase III complex [GO:0009360]	3'-5' exonuclease activity [GO:0008408]; DNA binding [GO:0003677]; DNA-directed DNA polymerase activity [GO:0003887]	cytoplasm [GO:0005737]; DNA polymerase III complex [GO:0009360]; 3'-5' exonuclease activity [GO:0008408]; DNA binding [GO:0003677]; DNA-directed DNA polymerase activity [GO:0003887]; DNA replication [GO:0006260]	13	13	12	55,8	42,087	0	323,31	4628600000	240		0,059856	0,926259		0,008799981	0,996155922	0,004279327		0,275223524	0,691094488	0,126351166		0,270380326	0,765474495	0,090694046		0,190917192	0,811058172	0,084239197		0,515865215	0,453624714	0,202697372	6	5	5	8	8	6	6	8	5
95	P72859	Aspartate transaminase	sll0938	1	biosynthetic process [GO:0009058]		catalytic activity [GO:0003824]; pyridoxal phosphate binding [GO:0030170]	catalytic activity [GO:0003824]; pyridoxal phosphate binding [GO:0030170]; biosynthetic process [GO:0009058]	5	5	5	16,4	42,071	0	19,264	287740000	62		0,423051	0,73425		1,203274951	1	-0,209705353		0,380799324	0,625833689	-0,137057877		0,449149208	0,669515556	-0,113685989		0,26682424	0,807880819	-0,061382675		0,258052546	0,737822339	0,067950439	2	3	2	0	2	1	2	1	3
96	P72877	Exopolysaccharide export protein	epsB	1	lipopolysaccharide biosynthetic process [GO:0009103]	membrane [GO:0016020]		membrane [GO:0016020]; lipopolysaccharide biosynthetic process [GO:0009103]	18	18	18	31,2	83,64	0	323,31	2820600000	338		0,141802	0,757076		0,034148274	0,990128878	-0,02517128		0,343184798	0,630268215	-0,152190399		0,465573788	0,542099217	-0,231822205		0,366672253	0,579900474	-0,247108459		0,754219106	0,285218618	-0,297552872	10	16	10	7	7	13	16	15	9
97	P72885	Alpha-D-glucose-1-phosphate cytidylyltransferase	rfbF	1	biosynthetic process [GO:0009058]		glucose-1-phosphate cytidylyltransferase activity [GO:0047343]	glucose-1-phosphate cytidylyltransferase activity [GO:0047343]; biosynthetic process [GO:0009058]	5	5	5	27,7	28,793	0	81,976	269020000	53		0,175361	0,57576		0,131581456	0,958098295	0,113759995		0,442828532	0,446723757	-0,492504883		0,183021039	0,785888152	-0,148840714		0,132416942	0,838897666	-0,117300034		0,065823612	0,893888712	0,056689453	3	1	1	1	1	3	3	1	1
98	P72888	Slr1610 protein	slr1610	1					8	8	8	23,1	48,013	0	48,493	1063200000	121		0,227547	0,701669		0,419776442	0,953451852	-0,191061401		0,762487867	0,375508091	-0,258857346		0,610651182	0,440153333	-0,324465179		0,748469103	0,365584314	-0,349635315		0,906888422	0,217678627	-0,323036575	5	5	4	6	3	3	4	2	5
99	P72890	Slr1612 protein	slr1612	1					10	10	10	47,2	33,045	0	147,99	646550000	111		0,202054	0,76847		0,308206251	0,943341709	0,09957962		0,435680762	0,60067908	0,136676407		0,57631164	0,552056774	0,162434769		0,248328255	0,763271665	0,098205185		0,699907185	0,290622222	0,324809265	3	3	3	1	3	4	3	4	1
100	P72897	Slr1619 protein	slr1619	1	chondroitin sulfate biosynthetic process [GO:0030206]; DIM/DIP cell wall layer assembly [GO:0071770]; lipid biosynthetic process [GO:0008610]	plasma membrane [GO:0005886]	methyltransferase activity [GO:0008168]	plasma membrane [GO:0005886]; methyltransferase activity [GO:0008168]; chondroitin sulfate biosynthetic process [GO:0030206]; DIM/DIP cell wall layer assembly [GO:0071770]; lipid biosynthetic process [GO:0008610]	7	7	7	27,7	27,752	0	191,03	3976100000	190		0,423247	0,897026		0,189591818	0,961046332	-0,046923447		0,865281	0,486393782	-0,135313034		0,604017826	0,622002312	-0,109766388		0,657330286	0,549545797	-0,137265396		0,993061483	0,352314322	-0,162574387	7	7	8	6	6	4	6	7	5
101	P72899	Slr1063 protein	slr1063	1			transferase activity, transferring glycosyl groups [GO:0016757]	transferase activity, transferring glycosyl groups [GO:0016757]	10	10	10	15,4	79,962	0	41,878	803330000	89		0,413826	0,687975		0,055527851	0,990057995	-0,030282593		0,329289648	0,644421053	-0,141903687		0,656481215	0,437993266	-0,289743805		0,505892377	0,524604651	-0,207545853		0,588719693	0,388533007	-0,240418625	4	3	3	3	3	1	4	4	2
102	P72901	Slr1065 protein	slr1065	1			transferase activity, transferring glycosyl groups [GO:0016757]	transferase activity, transferring glycosyl groups [GO:0016757]	4	4	4	21,3	41,592	0	68,217	243190000	78		0,419013	0,357659		1,122413214	1	0,39465065		0,464163358	0,511420792	0,23045311		0,950559025	0,33740107	0,372344589		0,847826178	0,336316916	0,342669296		0,259307895	0,568487805	-0,434294128	3	4	2	3	4	2	3	4	2
103	P72903	UDP-glucose-4-epimerase	galE	1	galactose metabolic process [GO:0006012]		coenzyme binding [GO:0050662]; UDP-glucose 4-epimerase activity [GO:0003978]	coenzyme binding [GO:0050662]; UDP-glucose 4-epimerase activity [GO:0003978]; galactose metabolic process [GO:0006012]	6	6	6	31,8	37,495	0	80,679	467310000	64		0,211227	0,424784		0,319209786	0,966776	-0,581625366		0,070456735	0,904724307	0,063608551		0,326424353	0,569207547	-0,546942139		0,153742321	0,811726433	0,133099365		0,624671851	0,225364198	-0,828524399	4	2	1	1	2	3	4	2	1
104	P72925	UPF0367 protein ssl1972	ssl1972	1					5	5	5	52,7	9,9234	0	33,053	777530000	41		1,34636	0,178957		0,761854785	1	1,395575333		0,880995505	0,176484848	1,571734619		0,873097564	0,2910625	1,532302475		0,750193002	0,272221498	1,368437958		0,018515895	0,963006813	-0,060298157	1	1	0	0	0	0	3	0	0
105	P72933	Hydroxyacylglutathione hydrolase (EC 3.1.2.6) (Glyoxalase II) (Glx II)	gloB sll1019	1	methylglyoxal catabolic process to D-lactate via S-lactoyl-glutathione [GO:0019243]		hydroxyacylglutathione hydrolase activity [GO:0004416]; metal ion binding [GO:0046872]	hydroxyacylglutathione hydrolase activity [GO:0004416]; metal ion binding [GO:0046872]; methylglyoxal catabolic process to D-lactate via S-lactoyl-glutathione [GO:0019243]	4	4	4	18,3	28,724	0	7,9714	263690000	22		1,21914	0,195143		0,549126345	1	0,645868301		0,845194362	0,220092754	0,844074631		0,039323659	0,956926014	-0,081100082		0,285168334	0,611511416	0,395609283		0,592441897	0,235	-0,956545639	0	1	0	0	3	0	0	1	1
106	P72937	Slr0670 protein	slr0670	1	response to stress [GO:0006950]			response to stress [GO:0006950]	18	18	18	77,3	32,676	0	323,31	4189000000	362		0,110948	0,868338		0,060576067	0,978070234	-0,040465546		0,377565143	0,596890365	0,173528671		0,457197173	0,588417266	0,169894791		0,100362209	0,901608624	0,044326782		0,26166697	0,672635036	0,109097672	9	11	10	12	10	9	12	14	8
107	P72939	Alkaline phosphatase	sll0654	1	nucleotide catabolic process [GO:0009166]		hydrolase activity [GO:0016787]	hydrolase activity [GO:0016787]; nucleotide catabolic process [GO:0009166]	35	35	35	36,4	149,39	0	323,31	8600700000	270		1,14494	0,150545		0,120997542	0,954682154	0,531246567		0,037754856	0,939645008	0,20279007		0,490965482	0,39910775	1,933267212		0,341750533	0,511579809	1,539209366	+	2,945232635	0,002666667	5,842170715	0	5	0	1	0	0	0	0	1
108	P72940	Probable adenylyl-sulfate kinase (EC 2.7.1.25) (APS kinase) (ATP adenosine-5'-phosphosulfate 3'-phosphotransferase) (Adenosine-5'-phosphosulfate kinase)	cysC slr0676	1	hydrogen sulfide biosynthetic process [GO:0070814]; sulfate assimilation [GO:0000103]		adenylylsulfate kinase activity [GO:0004020]; ATP binding [GO:0005524]	adenylylsulfate kinase activity [GO:0004020]; ATP binding [GO:0005524]; hydrogen sulfide biosynthetic process [GO:0070814]; sulfate assimilation [GO:0000103]	13	13	13	72,9	19,674	0	323,31	6542500000	328		0,661431	0,34418		0,388642037	0,976902386	0,337918854		1,016137601	0,195081081	0,631336975		1,261326067	0,302040816	0,7148983		0,42824509	0,510560217	0,351659393		0,391333208	0,472900336	0,307130051	6	12	4	7	14	8	13	11	8
109	P72941	Putative biopolymer transport protein ExbB-like 2	slr0677	1	protein import [GO:0017038]	integral component of plasma membrane [GO:0005887]	protein transporter activity [GO:0008565]	integral component of plasma membrane [GO:0005887]; protein transporter activity [GO:0008565]; protein import [GO:0017038]	5	5	5	17,2	25,074	0	94,882	972720000	86		0,250656	0,595775		0,288125789	0,936887538	0,237957382		0,762303209	0,30364775	0,420216751		0,793667424	0,354937063	0,425822449		0,279056327	0,664596757	0,212018967		0,093365771	0,848144262	0,081961823	2	3	3	2	3	2	5	1	4
110	P72963	Sll0638 protein	sll0638	1		outer membrane-bounded periplasmic space [GO:0030288]		outer membrane-bounded periplasmic space [GO:0030288]	5	5	5	17,5	50,443	0	54,67	263670000	38		0,184446	0,733879		0,181331393	0,949188248	-0,111913681		0,047520801	0,948358491	0,027425766		0,734608545	0,407355072	-0,295273972		0,903513161	0,396743546	-0,215118408		0,237142905	0,690044924	-0,108081818	1	1	2	1	2	0	3	0	1
111	P72964	Ycf45 protein	ycf45	1			ATP binding [GO:0005524]; nucleic acid binding [GO:0003676]	ATP binding [GO:0005524]; nucleic acid binding [GO:0003676]	15	15	15	34	65,942	0	323,31	1977800000	282		0,680975	0,558561		0,527529139	0,991128806	0,205587006		1,064548305	0,241866667	0,376408386		0,761257697	0,404292505	0,284848022		0,78516057	0,372657944	0,298661041		0,929947939	0,200013158	0,351205826	7	10	6	8	12	7	10	7	8
112	P72985	Slr1600 protein	slr1600	1					9	9	9	90,6	17,13	0	155,62	2339000000	111		0,0814212	0,894502		0,055710632	0,99115911	0,026478195		0,500010095	0,535672986	0,171379852		0,051437505	0,959231621	-0,024943542		0,152940605	0,833804702	0,091964722		0,473083136	0,511522258	0,165059662	3	6	3	3	3	5	6	3	2
113	P72988	UDP-3-O-acyl-N-acetylglucosamine deacetylase (UDP-3-O-acyl-GlcNAc deacetylase) (EC 3.5.1.108) (UDP-3-O-[R-3-hydroxymyristoyl]-N-acetylglucosamine deacetylase)	lpxC sll1508	1	lipid A biosynthetic process [GO:0009245]		metal ion binding [GO:0046872]; UDP-3-O-[3-hydroxymyristoyl] N-acetylglucosamine deacetylase activity [GO:0008759]; UDP-3-O-acyl-N-acetylglucosamine deacetylase activity [GO:0103117]	metal ion binding [GO:0046872]; UDP-3-O-[3-hydroxymyristoyl] N-acetylglucosamine deacetylase activity [GO:0008759]; UDP-3-O-acyl-N-acetylglucosamine deacetylase activity [GO:0103117]; lipid A biosynthetic process [GO:0009245]	4	4	4	25,4	30,326	0	17,001	75663000	27		0,388074	0,441735		0,337675082	0,952312611	0,27205925		0,393421115	0,524711538	-0,288933182		0,247281962	0,71560084	-0,203094482		0,489450635	0,448041916	-0,435989761		0,267233051	0,614528338	-0,185759354	1	0	1	2	1	0	0	0	2
114	P73007	Slr1043 protein	slr1043	1	chemotaxis [GO:0006935]	cytosol [GO:0005829]	signal transducer activity [GO:0004871]	cytosol [GO:0005829]; signal transducer activity [GO:0004871]; chemotaxis [GO:0006935]	5	5	5	34,2	20,682	0	39,028	320550000	38		0,423523	0,316435		0,814210575	1	-0,848949432		0,535542856	0,379876161	-0,509989166		0,721808843	0,329264368	-0,934629822		0,207299307	0,782749522	-0,107321548		0,04733903	0,924083269	-0,030942535	1	1	1	2	2	1	1	0	0
115	P73008	Methyl-accepting chemotaxis protein	mcpA	1		integral component of membrane [GO:0016021]	signal transducer activity [GO:0004871]	integral component of membrane [GO:0016021]; signal transducer activity [GO:0004871]	27	27	27	34,6	93,209	0	323,31	6185700000	299		0,0870274	0,949477		0,099758347	0,963474145	-0,043373489		0,215524819	0,772149499	-0,082046509		0,32311678	0,734436548	-0,101091766		0,362849671	0,703577202	-0,100294113		0,71088912	0,393824818	-0,184152222	13	8	11	7	6	11	13	10	6
116	P73012	Nuclease SbcCD subunit C	sbcC slr1048	1	DNA recombination [GO:0006310]; DNA replication [GO:0006260]		endonuclease activity [GO:0004519]; exonuclease activity [GO:0004527]	endonuclease activity [GO:0004519]; exonuclease activity [GO:0004527]; DNA recombination [GO:0006310]; DNA replication [GO:0006260]	3	3	3	4,3	116,21	0,0031332	1,9754	136410000	13		1,65099	0,247905		0,339124175	0,934082949	-0,17206459		1,408846438	0,153529412	-0,769226456		1,031533188	0,325610224	-0,395179749		0,904856826	0,329921397	-0,320521545		1,075275282	0,1523049	-0,373564911	1	2	1	0	0	0	1	2	0
117	P73033	Glycerol-3-phosphate dehydrogenase [NAD(P)+] (EC 1.1.1.94) (NAD(P)H-dependent glycerol-3-phosphate dehydrogenase)	gpsA slr1755	1	carbohydrate metabolic process [GO:0005975]; glycerol-3-phosphate catabolic process [GO:0046168]; glycerophospholipid metabolic process [GO:0006650]; phospholipid biosynthetic process [GO:0008654]	glycerol-3-phosphate dehydrogenase complex [GO:0009331]	glycerol-3-phosphate dehydrogenase [NAD(P)+] activity [GO:0047952]; glycerol-3-phosphate dehydrogenase [NAD+] activity [GO:0004367]; glycerol-3-phosphate dehydrogenase [NADP+] activity [GO:0036439]; NAD binding [GO:0051287]	glycerol-3-phosphate dehydrogenase complex [GO:0009331]; glycerol-3-phosphate dehydrogenase [NAD(P)+] activity [GO:0047952]; glycerol-3-phosphate dehydrogenase [NAD+] activity [GO:0004367]; glycerol-3-phosphate dehydrogenase [NADP+] activity [GO:0036439]; NAD binding [GO:0051287]; carbohydrate metabolic process [GO:0005975]; glycerol-3-phosphate catabolic process [GO:0046168]; glycerophospholipid…	11	11	11	52,4	33,511	0	194,63	3222900000	167		0,00882913	1		0,030373155	0,994	-0,004720306		0,010838466	0,992644395	-0,001607513		0,029759728	0,983660606	-0,006288528		0,147854291	0,940667199	0,015312195		0,282070722	0,798132879	0,041751099	3	8	6	4	3	6	6	5	5
118	P73034	Sll1647 protein	sll1647	1	protein acetylation [GO:0006473]		N-acetyltransferase activity [GO:0008080]; transferase activity, transferring acyl groups other than amino-acyl groups [GO:0016747]	N-acetyltransferase activity [GO:0008080]; transferase activity, transferring acyl groups other than amino-acyl groups [GO:0016747]; protein acetylation [GO:0006473]	4	4	4	39	19,576	0	9,539	120410000	37		0,112649	0,8197		0,549453375	0,96075969	0,145946884		0,534819618	0,510199753	0,184450531		1,079116157	0,351429975	0,279826355		0,470594459	0,517835544	0,255541992		0,149173366	0,805132713	0,0686306	1	1	1	1	1	1	1	1	1
119	P73039	Slr1762 protein	slr1762	1	dephosphorylation [GO:0016311]; DNA repair [GO:0006281]	cytosol [GO:0005829]	phosphoglycolate phosphatase activity [GO:0008967]	cytosol [GO:0005829]; phosphoglycolate phosphatase activity [GO:0008967]; dephosphorylation [GO:0016311]; DNA repair [GO:0006281]	6	6	6	37,6	23,714	0	16,851	461930000	58		0,189214	0,664168		0,020608053	0,990150271	0,025360489		0,277033504	0,632888425	0,225442505		0,427630167	0,527911602	0,347401428		0,373569481	0,561938499	0,29465065		0,452768698	0,412233611	0,355440521	0	2	1	0	3	3	2	0	1
120	P73043	Glutamate decarboxylase (EC 4.1.1.15)	gad	1	glutamate metabolic process [GO:0006536]		glutamate decarboxylase activity [GO:0004351]; pyridoxal phosphate binding [GO:0030170]	glutamate decarboxylase activity [GO:0004351]; pyridoxal phosphate binding [GO:0030170]; glutamate metabolic process [GO:0006536]	13	13	13	34,7	53,041	0	168,5	1557700000	156		0,477282	0,550923		0,33892657	0,93465053	-0,164047623		1,182849795	0,202496732	-0,43289566		0,760162195	0,378644211	-0,37113266		0,62637431	0,419732026	-0,314795303		0,72900134	0,304365101	-0,275173569	7	7	5	3	4	7	5	3	3
121	P73048	Sll1638 protein	sll1638	1	photosynthesis [GO:0015979]	extrinsic component of membrane [GO:0019898]; photosystem II oxygen evolving complex [GO:0009654]; plasma membrane-derived thylakoid photosystem II [GO:0030096]	calcium ion binding [GO:0005509]	extrinsic component of membrane [GO:0019898]; photosystem II oxygen evolving complex [GO:0009654]; plasma membrane-derived thylakoid photosystem II [GO:0030096]; calcium ion binding [GO:0005509]; photosynthesis [GO:0015979]	10	10	10	61,7	16,477	0	205,14	5764000000	210		0,491672	0,454766		0,252021258	0,926197333	-0,193389893		0,183472275	0,762950276	-0,121810913		0,08931952	0,914305369	-0,05985527		0,551881093	0,465679883	-0,283533096		1,000350567	0,117095335	-0,585487366	7	10	8	7	4	4	10	8	6
122	P73066	Ycf23 protein	ycf23	1			catalytic activity [GO:0003824]	catalytic activity [GO:0003824]	4	4	4	23,8	25,366	0	186,13	563770000	82		0,248388	0,627657		0,365370703	0,938763948	0,122953796		0,011243822	0,987350299	-0,006538391		0,536970167	0,536096515	-0,198932266		0,132015337	0,843882667	-0,100746536		0,450570523	0,456086364	0,249631119	1	2	2	3	3	1	1	3	4
123	P73069	Ycf48-like protein	slr2034	1					19	19	19	61,7	37,29	0	323,31	10497000000	289		0,0491646	0,985352		0,061074188	0,991646865	-0,023325729		0,340433653	0,672794383	0,109474564		0,180589388	0,845415111	0,064092636		0,088412533	0,916609337	0,037791824		0,156488814	0,825435983	0,050509644	7	11	11	9	9	9	11	9	7
124	P73091	Slr2048 protein	slr2048	1		outer membrane-bounded periplasmic space [GO:0030288]	identical protein binding [GO:0042802]	outer membrane-bounded periplasmic space [GO:0030288]; identical protein binding [GO:0042802]	6	6	6	23,4	44,256	0	46,443	274090000	31		1,33679	0,185429		0,024747132	0,989900709	-0,051868057		0,273696427	0,597097345	-0,454061508		1,149958176	0,318390805	1,028674698		0,499108464	0,412552413	0,692673874	+	1,838243239	0,019161905	1,357273865	1	1	0	1	1	1	1	1	1
125	P73103	Slr1908 protein	slr1908	1	transport [GO:0006810]	integral component of membrane [GO:0016021]	transporter activity [GO:0005215]	integral component of membrane [GO:0016021]; transporter activity [GO:0005215]; transport [GO:0006810]	30	30	21	56,5	64,51	0	323,31	12315000000	635		0,14091	0,72025		0,13302801	0,956314961	-0,093202209		0,120507532	0,835583404	0,080176163		0,489701701	0,517189189	0,280498886		0,400987032	0,577479714	0,210625839		0,388027943	0,520617711	0,214758301	13	14	18	19	19	12	22	20	13
126	P73104	NarL subfamily	slr1909	1	phosphorelay signal transduction system [GO:0000160]; regulation of transcription, DNA-templated [GO:0006355]; transcription, DNA-templated [GO:0006351]	intracellular [GO:0005622]	DNA binding [GO:0003677]	intracellular [GO:0005622]; DNA binding [GO:0003677]; phosphorelay signal transduction system [GO:0000160]; regulation of transcription, DNA-templated [GO:0006355]; transcription, DNA-templated [GO:0006351]	6	6	6	37,1	24,046	0	121,62	1390400000	63		0,0343357	0,989263		0,343771482	0,933850416	-0,122877502		0,370689392	0,65596738	-0,112116623		0,207839914	0,82287796	-0,071564865		0,241633563	0,7908	-0,080590439		0,287622973	0,676946315	-0,093504333	3	1	2	2	1	3	2	2	1
127	P73107	Sll1837 protein	sll1837	1		outer membrane-bounded periplasmic space [GO:0030288]		outer membrane-bounded periplasmic space [GO:0030288]	7	7	7	45,5	15,467	0	53,205	898430000	65		0,754202	0,476416		0,052335392	0,988688525	-0,027458572		0,796051624	0,310428016	-0,37135582		0,53546966	0,524545202	-0,22123909		0,085659871	0,905147568	0,051834869		0,635149375	0,361815889	-0,249646759	2	1	3	2	3	1	0	2	1
128	P73111	Sll1835 protein	sll1835	1		outer membrane-bounded periplasmic space [GO:0030288]		outer membrane-bounded periplasmic space [GO:0030288]	11	11	11	70,9	28,832	0	323,31	5333200000	253		0,366954	0,57442		0,584120494	1	0,268110657		1,040558124	0,225797753	0,446442032		0,506275728	0,521455571	0,252456284		0,879559454	0,371878788	0,259194946		0,1381587	0,811395781	0,072556305	8	9	10	8	9	8	9	9	4
129	P73117	Penicillin-binding protein	ftsI	1		integral component of membrane [GO:0016021]	penicillin binding [GO:0008658]	integral component of membrane [GO:0016021]; penicillin binding [GO:0008658]	12	12	12	24,9	66,631	0	39,928	424430000	62		0,334928	0,411217		0,419957386	1	0,493809128		0,632098992	0,31339499	0,687670517		0,569299593	0,399071698	0,629948807		0,145931517	0,795306818	0,271417999		0,748028411	0,171065026	0,796235275	1	1	1	0	1	2	2	3	1
130	P73120	Sll1830 protein	sll1830	1					19	19	19	53,4	39,648	0	323,31	7113400000	391		0,95274	0,36295		0,114550028	0,96431178	-0,040128326		0,457620007	0,523189385	-0,212472534		0,64998031	0,630361335	-0,101424408		0,515398346	0,58841784	-0,137636185	+	1,630695584	0,048885906	-0,565074539	11	13	12	14	12	14	12	12	12
131	P73121	Uncharacterized protein slr1919	slr1919	1			ATP binding [GO:0005524]; protein kinase activity [GO:0004672]	ATP binding [GO:0005524]; protein kinase activity [GO:0004672]	11	11	11	21,6	65,078	0	38,641	1685500000	78		0,0381812	0,955151		0,075413191	0,965856298	-0,040203094		0,255251459	0,778291815	0,059742737		0,337442919	0,747351351	0,087945938		0,515781691	0,650401756	-0,100325775		0,059694249	0,909976507	0,037327957	2	1	2	1	2	2	2	1	2
132	P73128	Sulfolipid biosynthesis protein SqdB	sqdB	1			catalytic activity [GO:0003824]; coenzyme binding [GO:0050662]	catalytic activity [GO:0003824]; coenzyme binding [GO:0050662]	25	25	25	70	43,202	0	323,31	30833000000	637		0,396781	0,902533		0,820396383	1	0,156145477		0,627488682	0,58390583	0,108567429		0,690493192	0,550871928	0,138321686		0,95327558	0,437297638	0,172508621		0,536850189	0,554793319	0,115156937	10	24	23	22	21	18	25	22	17
133	P73138	S-(hydroxymethyl)glutathione dehydrogenase (EC 1.1.1.284) (Alcohol dehydrogenase class-3) (EC 1.1.1.1) (Alcohol dehydrogenase class-III) (Glutathione-dependent formaldehyde dehydrogenase) (FALDH) (FDH) (GSH-FDH) (EC 1.1.1.-)	frmA sll0990	1	ethanol oxidation [GO:0006069]	cytoplasm [GO:0005737]	alcohol dehydrogenase (NAD) activity [GO:0004022]; S-(hydroxymethyl)glutathione dehydrogenase activity [GO:0051903]; zinc ion binding [GO:0008270]	cytoplasm [GO:0005737]; alcohol dehydrogenase (NAD) activity [GO:0004022]; S-(hydroxymethyl)glutathione dehydrogenase activity [GO:0051903]; zinc ion binding [GO:0008270]; ethanol oxidation [GO:0006069]	4	4	4	13,6	39,21	0	31,35	628400000	42		0,291657	0,492343		0,589496017	1	-0,508621597		0,642793525	0,370215686	-0,358098602		0,442880777	0,536402685	-0,282653046		0,700107399	0,323468531	-0,645042419		1,196973393	0,078554217	-0,615251923	1	1	2	2	1	2	1	1	1
134	P73141;P73144	Tyrosine--tRNA ligase (EC 6.1.1.1) (Tyrosyl-tRNA synthetase) (TyrRS)	tyrS slr1031	2	tRNA aminoacylation [GO:0043039]; tyrosyl-tRNA aminoacylation [GO:0006437]	cytosol [GO:0005829]	ATP binding [GO:0005524]; RNA binding [GO:0003723]; tyrosine-tRNA ligase activity [GO:0004831]	cytosol [GO:0005829]; ATP binding [GO:0005524]; RNA binding [GO:0003723]; tyrosine-tRNA ligase activity [GO:0004831]; tRNA aminoacylation [GO:0043039]; tyrosyl-tRNA aminoacylation [GO:0006437]	13	13	13	46	44,901	0	96,816	1691900000	165		0,806506	0,747966		0,587026649	0,933950413	0,078565598		1,257404672	0,291603239	0,22828598		0,771249232	0,533624831	0,139927292		0,420141372	0,736048	0,072902679		0,054639738	0,938550192	0,01570015	1	4	5	3	4	5	6	5	3
135	P73157	Probable signal peptidase I-2 (SPase I-2) (EC 3.4.21.89) (Leader peptidase I-2)	lepB2 slr1377	1		integral component of membrane [GO:0016021]; plasma membrane [GO:0005886]	serine-type peptidase activity [GO:0008236]	integral component of membrane [GO:0016021]; plasma membrane [GO:0005886]; serine-type peptidase activity [GO:0008236]	3	3	3	20,6	24,733	0	15,397	636090000	48		0,267203	0,344859		0,009239877	0,995945496	0,027970123		0,697402302	0,256662005	1,053430176		0,767027399	0,307549488	1,155718231		0,016739367	0,977434882	0,054506683		0,023360712	0,951580228	0,067127991	1	1	1	1	1	1	2	1	1
136	P73158	Slr1378 protein	slr1378	1					2	2	2	16,5	26,989	0	13,263	69947000	30		0,230932	0,476461		0,019278838	0,988812983	-0,03141098		2,440400275	0,221714286	-0,783886337		0,186042529	0,757646365	-0,247000122		0,207412417	0,768870748	-0,128422165		0,097779254	0,875156879	-0,040940094	2	1	1	1	0	0	1	1	1
137	P73162	Acetate kinase (EC 2.7.2.1) (Acetokinase)	ackA sll1299	1	acetyl-CoA biosynthetic process [GO:0006085]; organic acid metabolic process [GO:0006082]	cytoplasm [GO:0005737]	acetate kinase activity [GO:0008776]; ATP binding [GO:0005524]; metal ion binding [GO:0046872]	cytoplasm [GO:0005737]; acetate kinase activity [GO:0008776]; ATP binding [GO:0005524]; metal ion binding [GO:0046872]; acetyl-CoA biosynthetic process [GO:0006085]; organic acid metabolic process [GO:0006082]	6	6	6	22,8	44,761	0	23,948	293510000	67		0,796701	0,476144		0,608527287	1	-0,261236572		1,017905265	0,252325359	-0,368181992		1,087378358	0,303285171	-0,447751617		0,784377503	0,349786164	-0,367185974		1,14079935	0,124624506	-0,416364288	2	2	3	4	1	2	3	3	2
138	P73163	Putative carboxymethylenebutenolidase (EC 3.1.1.45) (Dienelactone hydrolase) (DLH)	sll1298	1			carboxymethylenebutenolidase activity [GO:0008806]	carboxymethylenebutenolidase activity [GO:0008806]	6	6	6	22,8	26,941	0	61,267	1969600000	145		1,07318	0,337125		0,415303285	0,968488978	-0,230677414		1,308535118	0,15134	-0,577721405		1,091044983	0,291625	-0,532674408		1,042639889	0,267353135	-0,446628571		0,849048268	0,205154839	-0,395172501	2	2	5	6	5	3	3	5	6
139	P73177	Uncharacterized ribonuclease sll1290 (EC 3.1.-.-)	sll1290	1	RNA catabolic process [GO:0006401]; rRNA processing [GO:0006364]	exosome (RNase complex) [GO:0000178]; P-body [GO:0000932]	3'-5'-exoribonuclease activity [GO:0000175]	exosome (RNase complex) [GO:0000178]; P-body [GO:0000932]; 3'-5'-exoribonuclease activity [GO:0000175]; RNA catabolic process [GO:0006401]; rRNA processing [GO:0006364]	15	15	15	30,8	75,801	0	83,136	1051500000	138		0,462553	0,662178		0,06623086	0,979345029	0,032606506		0,826406888	0,348665511	0,270848846		0,985612436	0,381368635	0,243965912		0,185564987	0,811678967	0,087327194		0,921506781	0,26995977	0,244500732	3	4	1	2	3	3	6	2	1
140	P73182	Fe(2+) transporter FeoB (Ferrous iron transport protein B homolog)	feoB slr1392	1	iron ion homeostasis [GO:0055072]	integral component of membrane [GO:0016021]; plasma membrane [GO:0005886]	ferrous iron transmembrane transporter activity [GO:0015093]; GTP binding [GO:0005525]	integral component of membrane [GO:0016021]; plasma membrane [GO:0005886]; ferrous iron transmembrane transporter activity [GO:0015093]; GTP binding [GO:0005525]; iron ion homeostasis [GO:0055072]	3	3	3	5,5	67,404	0,0036176	1,8401	905870000	13		0,413068	0,24825		1,201653431	1	2,605421448		0,255193707	0,596422692	0,856834793		0,212457788	0,688150054	0,79785614		0,204569279	0,684648421	0,72633667		0,012707347	0,968947683	-0,06256752	0	0	0	0	0	0	0	1	0
141	P73189	Slr1397 protein	slr1397	1					4	4	4	21,7	22,967	0	35,819	296180000	64		1,35616	0,221481		0,362330349	0,935525974	-0,181439209		0,212315623	0,76350322	-0,092088699		0,22076901	0,764535922	-0,129100037		0,528576222	0,47773542	-0,277168274	+	1,367824389	0,044	-0,954901505	1	4	1	1	3	2	3	2	1
142	P73193	Sporulation protein SpoIID	spoIID	1	sporulation resulting in formation of a cellular spore [GO:0030435]	outer membrane-bounded periplasmic space [GO:0030288]		outer membrane-bounded periplasmic space [GO:0030288]; sporulation resulting in formation of a cellular spore [GO:0030435]	5	5	5	15,9	42,134	0	19,636	341640000	44		2,17758	0,161714		0,290657494	0,952492201	0,430409241		0,53763324	0,37047557	0,610834885		1,902068434	0,552	1,293569183		2,680770772	0,384	1,586764526	+	2,943182919	0,004888889	1,831661224	0	0	0	0	2	0	0	0	0
143	P73197	Sll1582 protein	sll1582	1					4	4	4	3,7	129,02	0	11,034	475280000	28		0,478428	0,515224		0,014304909	0,995957576	-0,006443024		0,375098375	0,629493107	-0,135808563		0,780509451	0,399414634	-0,287034607		0,66540125	0,424990354	-0,271487045		1,093585171	0,126178988	-0,43920517	1	0	1	1	1	1	0	1	1
144	P73198	GumB protein	gumB	1		membrane [GO:0016020]	polysaccharide transmembrane transporter activity [GO:0015159]	membrane [GO:0016020]; polysaccharide transmembrane transporter activity [GO:0015159]	12	12	12	39,7	54,125	0	190,69	957300000	253		0,135326	0,875418		0,265648701	0,941891824	-0,123190689		0,246269653	0,752740187	-0,08637619		0,686491403	0,449331158	-0,248953629		0,136078826	0,866038261	-0,062482452		0,330212339	0,613955896	-0,125943375	6	9	10	9	10	6	12	6	5
145	P73220	ABC transporter	sll1927	1	peptide transport [GO:0015833]		ATPase activity [GO:0016887]; ATP binding [GO:0005524]	ATP binding [GO:0005524]; ATPase activity [GO:0016887]; peptide transport [GO:0015833]	11	11	11	28,6	72,878	0	63,885	984470000	125		0,740382	0,495648		0,416667144	0,953105455	-0,184893036		1,094262984	0,224935484	-0,396239853		0,863276865	0,363151242	-0,340423584		0,767131061	0,371504621	-0,306490326		1,106977775	0,125502935	-0,432809067	6	4	4	4	2	5	3	4	4
146	P73222	Slr2005 protein	slr2005	1		outer membrane-bounded periplasmic space [GO:0030288]		outer membrane-bounded periplasmic space [GO:0030288]	7	7	7	42,1	27,975	0	107,45	2344000000	144		0,00150141	0,999307		0,077545842	0,9896713	0,016468811		0,099890632	0,9296192	-0,020579529		0,010295291	0,998421605	0,003394699		0,077322025	0,943175159	-0,02098465		0,054638472	0,95189642	0,010552216	6	5	4	4	6	4	5	5	4
147	P73240	Sll1921 protein	sll1921	1					3	3	2	17,1	28,295	0	12,752	253530000	28		0,252466	0,45192		0,44887719	1	0,454033661		0,668859828	0,310729045	0,578012848		0,308386193	0,611892523	0,345505905		0,149035385	0,794408357	-0,254873276		0,212824549	0,633811676	0,303195572	1	1	1	0	0	0	2	1	0
148	P73242	Malonyl CoA-acyl carrier protein transacylase (MCT) (EC 2.3.1.39)	fabD slr2023	1	fatty acid biosynthetic process [GO:0006633]		[acyl-carrier-protein] S-malonyltransferase activity [GO:0004314]	[acyl-carrier-protein] S-malonyltransferase activity [GO:0004314]; fatty acid biosynthetic process [GO:0006633]	6	6	6	18,1	31,49	0	23,524	1156800000	55		0,357631	0,626425		0,173331582	0,955424947	-0,096195984		0,406492784	0,608051836	0,139534378		0,11634378	0,891	0,067712784		0,49020355	0,516826316	0,233399582		1,040816948	0,213398425	0,276000595	0	1	1	1	2	0	2	1	2
149	P73243	CheY subfamily	slr2024	1	phosphorelay signal transduction system [GO:0000160]	intracellular [GO:0005622]		intracellular [GO:0005622]; phosphorelay signal transduction system [GO:0000160]	11	11	11	67,2	20,233	0	76,225	4233900000	138		0,0708718	0,934668		0,010647346	0,995876599	0,005231094		0,237351	0,741820246	-0,101631165		0,014655937	0,989723356	0,009519958		0,2973818	0,703511892	-0,127331161		0,374307712	0,586021934	-0,13501091	4	3	4	6	5	5	5	4	4
150	P73248	Dihydropteroate synthase (DHPS) (EC 2.5.1.15) (Dihydropteroate pyrophosphorylase)	folP slr2026	1	folic acid biosynthetic process [GO:0046656]; tetrahydrofolate biosynthetic process [GO:0046654]	cytosol [GO:0005829]	dihydropteroate synthase activity [GO:0004156]; metal ion binding [GO:0046872]	cytosol [GO:0005829]; dihydropteroate synthase activity [GO:0004156]; metal ion binding [GO:0046872]; folic acid biosynthetic process [GO:0046656]; tetrahydrofolate biosynthetic process [GO:0046654]	4	4	4	17	31,602	0,00054915	2,8808	104150000	43		0,115139	0,625855		0,234688759	0,936987448	-0,304383469		0,18152478	0,73078626	-0,225991058		0,698117049	0,351903614	-0,656793213		0,046666313	0,940686901	-0,065988541		0,216742392	0,656233766	-0,199983597	2	2	2	2	0	1	0	1	2
151	P73250	Sll1913 protein	sll1913	1			oxidoreductase activity [GO:0016491]	oxidoreductase activity [GO:0016491]	6	6	6	14,7	66,599	0	15,678	275950000	31		0,183831	0,566276		0,113412135	0,954621094	0,143572998		0,028041927	0,961644513	-0,039328766		0,510340902	0,472336391	0,364914322		0,852534399	0,293158774	0,532258224		0,372002833	0,504043621	0,268070602	1	0	0	0	0	0	2	0	0
152	P73257	Argininosuccinate lyase (ASAL) (EC 4.3.2.1) (Arginosuccinase)	argH slr1133	1	arginine biosynthetic process via ornithine [GO:0042450]	cytoplasm [GO:0005737]	argininosuccinate lyase activity [GO:0004056]	cytoplasm [GO:0005737]; argininosuccinate lyase activity [GO:0004056]; arginine biosynthetic process via ornithine [GO:0042450]	20	20	20	50,5	50,947	0	323,31	6423700000	370		0,363778	0,854853		0,218831016	0,954464066	0,059908676		0,036375732	0,969749235	0,010481262		0,392089517	0,741097881	0,081110382		0,159998039	0,875821918	-0,042531967		0,49922545	0,551513116	-0,125220871	9	10	9	11	15	11	12	9	12
153	P73260	Sll1084 protein	sll1084	1			catalytic activity [GO:0003824]; iron-sulfur cluster binding [GO:0051536]	catalytic activity [GO:0003824]; iron-sulfur cluster binding [GO:0051536]	8	8	8	12,8	97,388	0	37,543	651290000	85		0,00615576	0,999097		0,108426371	0,962231317	0,04628067		0,05164845	0,946854914	0,020637131		0,035086865	0,972197379	-0,015261841		0,103202714	0,908039474	0,03621254		0,09722778	0,885168	-0,034623718	2	3	3	3	3	5	1	2	3
154	P73264	3-amino-5-hydroxybenzoic acid synthase	slr1140	1			catalytic activity [GO:0003824]	catalytic activity [GO:0003824]	19	19	19	70,9	41,559	0	323,31	6891300000	297		0,242278	0,934329		0,106973541	0,968195946	0,025331116		0,790703802	0,509367647	0,127636719		0,633660657	0,570127341	0,134721756		0,573772049	0,65171116	0,092556763		0,63219078	0,52018986	0,119212341	7	12	6	6	7	9	13	9	5
155	P73270	Probable agmatinase 2 (EC 3.5.3.11) (Agmatine ureohydrolase 2) (AUH 2)	speB2 sll1077	1	putrescine biosynthetic process [GO:0009446]		agmatinase activity [GO:0008783]; metal ion binding [GO:0046872]	agmatinase activity [GO:0008783]; metal ion binding [GO:0046872]; putrescine biosynthetic process [GO:0009446]	6	6	6	17,9	42,963	0	10,823	734560000	43		0,118864	0,682503		0,127172114	0,961429952	-0,080862427		0,465488226	0,488220796	0,275107574		0,188133215	0,756558505	-0,23993187		0,546295107	0,533192357	0,177216721		0,019787704	0,966547637	0,013282394	1	1	1	0	2	2	1	0	1
156	P73274	Leucine--tRNA ligase (EC 6.1.1.4) (Leucyl-tRNA synthetase) (LeuRS)	leuS sll1074	1	leucyl-tRNA aminoacylation [GO:0006429]	cytosol [GO:0005829]	aminoacyl-tRNA editing activity [GO:0002161]; ATP binding [GO:0005524]; leucine-tRNA ligase activity [GO:0004823]	cytosol [GO:0005829]; aminoacyl-tRNA editing activity [GO:0002161]; ATP binding [GO:0005524]; leucine-tRNA ligase activity [GO:0004823]; leucyl-tRNA aminoacylation [GO:0006429]	32	32	32	48,3	98,294	0	323,31	10531000000	476		0,0451352	0,990072		0,013121522	0,996439098	-0,003564453		0,288382817	0,771126354	-0,059495163		0,124016164	0,932707038	-0,024477768		0,123980648	0,917092396	-0,026205826		0,205285221	0,798653061	0,051270294	12	14	14	15	14	14	16	15	17
157	P73283	3-oxoacyl-[acyl-carrier-protein] synthase 2 (EC 2.3.1.179) (3-oxoacyl-[acyl-carrier-protein] synthase II) (Beta-ketoacyl-ACP synthase II) (KAS II)	fabF sll1069	1	fatty acid biosynthetic process [GO:0006633]		beta-ketoacyl-acyl-carrier-protein synthase II activity [GO:0033817]	beta-ketoacyl-acyl-carrier-protein synthase II activity [GO:0033817]; fatty acid biosynthetic process [GO:0006633]	18	18	18	57,7	44,004	0	323,31	6407400000	467		0,105528	0,98677		0,303678135	0,955070064	0,053603745		0,59338423	0,643867769	0,083379364		0,179088825	0,887091067	0,041726303		1,279247126	0,516369393	0,106848907		0,535510161	0,634273327	0,074510193	11	15	14	13	15	14	20	13	8
158	P73303	50S ribosomal protein L15	rplO rpl15 sll1813	1	translation [GO:0006412]	cytosolic large ribosomal subunit [GO:0022625]	rRNA binding [GO:0019843]; structural constituent of ribosome [GO:0003735]	cytosolic large ribosomal subunit [GO:0022625]; rRNA binding [GO:0019843]; structural constituent of ribosome [GO:0003735]; translation [GO:0006412]	10	10	10	83,7	15,194	0	323,31	23955000000	199		0,680865	0,500269		0,141077521	0,958657453	0,082420349		0,339561577	0,630675079	0,152597427		0,517217883	0,538749014	0,200350952		0,698446831	0,430060413	0,245350647		1,199889903	0,102231947	0,471334839	5	4	8	7	5	4	7	8	9
159	P73305	50S ribosomal protein L18	rplR rpl18 sll1811	1	translation [GO:0006412]	cytosolic large ribosomal subunit [GO:0022625]	5S rRNA binding [GO:0008097]; structural constituent of ribosome [GO:0003735]	cytosolic large ribosomal subunit [GO:0022625]; 5S rRNA binding [GO:0008097]; structural constituent of ribosome [GO:0003735]; translation [GO:0006412]	10	10	10	76,7	13,204	0	323,31	11854000000	173		0,422452	0,443653		0,257294098	0,927832461	0,16583519		0,016059357	0,97805283	-0,014518356		0,273554322	0,691215352	0,195093918		0,300890928	0,628504505	0,260229492		1,315920124	0,065900552	0,626979446	5	5	6	5	5	4	6	4	6
160	P73312	50S ribosomal protein L29	rpmC rpl29 ssl3436	1	translation [GO:0006412]	cytosolic large ribosomal subunit [GO:0022625]	structural constituent of ribosome [GO:0003735]	cytosolic large ribosomal subunit [GO:0022625]; structural constituent of ribosome [GO:0003735]; translation [GO:0006412]	8	8	8	74	8,5455	0	243,84	9810700000	245		0,257278	0,553416		0,146866396	0,955028807	-0,11269989		0,20619007	0,754664186	0,108849335		0,083854597	0,913569748	0,073513412		0,118826193	0,856917399	0,100752258		0,777468018	0,207085346	0,473897552	6	7	8	6	8	9	8	5	5
161	P73316	30S ribosomal protein S19	rpsS rps19 ssl3432	1	ribosomal small subunit assembly [GO:0000028]; translation [GO:0006412]	cytosolic small ribosomal subunit [GO:0022627]	rRNA binding [GO:0019843]; structural constituent of ribosome [GO:0003735]	cytosolic small ribosomal subunit [GO:0022627]; rRNA binding [GO:0019843]; structural constituent of ribosome [GO:0003735]; ribosomal small subunit assembly [GO:0000028]; translation [GO:0006412]	5	5	5	48,9	10,29	0	132,57	15341000000	106		0,390374	0,49235		0,238104793	0,92425974	0,19802475		0,637315916	0,368013136	0,371466827		0,162994295	0,811131725	0,137581635		0,755012334	0,329336343	0,472420883		0,919803656	0,141871087	0,542932129	3	3	3	0	3	3	3	3	3
162	P73318	50S ribosomal protein L23	rplW rpl23 sll1801	1	ribosomal large subunit assembly [GO:0000027]; translation [GO:0006412]	cytosolic large ribosomal subunit [GO:0022625]	RNA binding [GO:0003723]; rRNA binding [GO:0019843]; structural constituent of ribosome [GO:0003735]	cytosolic large ribosomal subunit [GO:0022625]; RNA binding [GO:0003723]; rRNA binding [GO:0019843]; structural constituent of ribosome [GO:0003735]; ribosomal large subunit assembly [GO:0000027]; translation [GO:0006412]	10	10	10	73,3	11,526	0	104,58	20859000000	307		0,745372	0,414136		0,302596649	0,932565934	0,144971848		1,509151816	0,155578947	0,43543129		0,891625025	0,337259259	0,413731766		1,0498578	0,273623003	0,420691299		1,226366813	0,096975391	0,477674866	5	12	10	4	10	10	10	10	6
163	P73321	Uncharacterized protein slr1894	slr1894	1	cellular iron ion homeostasis [GO:0006879]; response to stress [GO:0006950]	cell [GO:0005623]	ferric iron binding [GO:0008199]; oxidoreductase activity, oxidizing metal ions [GO:0016722]	cell [GO:0005623]; ferric iron binding [GO:0008199]; oxidoreductase activity, oxidizing metal ions [GO:0016722]; cellular iron ion homeostasis [GO:0006879]; response to stress [GO:0006950]	13	13	13	73,1	17,755	0	323,31	21592000000	325		0,266562	0,699457		0,542309047	1	-0,24930191		0,657716245	0,400245142	-0,267928696		0,64072763	0,420885017	-0,340907669		0,795809689	0,353556936	-0,347393036		0,538140223	0,39035122	-0,277803802	12	11	11	10	9	9	11	9	10
164	P73325	SrrA	srrA	1	transport [GO:0006810]			transport [GO:0006810]	7	7	7	26,1	47,606	0	34,109	450660000	85		0,596327	0,661442		0,324594871	0,929569231	-0,104809189		0,482318266	0,619254019	-0,110506439		0,014856038	0,992977376	-0,005870438		0,866869266	0,438807453	-0,183248138		1,015494009	0,203696284	-0,300304794	2	5	0	2	2	3	4	5	1
165	P73328	Slr1900 protein	slr1900	1					9	9	9	47	27,406	0	249,99	1504900000	103		0,570828	0,528571		0,202266342	0,937604545	0,125542831		0,719084154	0,336811388	0,367113876		0,901280709	0,337	0,403540802		0,581853086	0,443093656	0,292791748		0,768271852	0,253282799	0,342161179	5	5	2	3	6	4	5	2	2
166	P73329	ABC transporter	slr1901	1			ATPase activity [GO:0016887]; ATP binding [GO:0005524]	ATP binding [GO:0005524]; ATPase activity [GO:0016887]	4	4	4	17,5	36,62	0	7,3327	215020000	50		0,458835	0,590083		0,627629045	1	-0,209491348		0,797371718	0,363023256	-0,260255814		0,525170156	0,51295977	-0,253099442		0,621623171	0,441234109	-0,272817612		1,208313824	0,107004255	-0,443379974	1	2	1	3	2	2	2	2	3
167	P73336	30S ribosomal protein S20	rpsT rps20 ssl2233	1	translation [GO:0006412]	ribosome [GO:0005840]	rRNA binding [GO:0019843]; structural constituent of ribosome [GO:0003735]	ribosome [GO:0005840]; rRNA binding [GO:0019843]; structural constituent of ribosome [GO:0003735]; translation [GO:0006412]	5	5	5	47,4	10,702	0	184,81	11256000000	80		0,0662281	0,895191		0,090322387	0,965618134	-0,046110535		0,143844529	0,838860524	-0,056155777		0,033361759	0,972881671	0,018085861		0,141510924	0,868114583	-0,057379913		0,46359848	0,501296943	0,178679276	0	2	3	3	3	3	2	3	3
168	P73340	Chromosome partition protein Smc	smc sll1120	1	chromosome condensation [GO:0030261]; sister chromatid cohesion [GO:0007062]	chromosome [GO:0005694]; cytoplasm [GO:0005737]	ATP binding [GO:0005524]; DNA binding [GO:0003677]	chromosome [GO:0005694]; cytoplasm [GO:0005737]; ATP binding [GO:0005524]; DNA binding [GO:0003677]; chromosome condensation [GO:0030261]; sister chromatid cohesion [GO:0007062]	8	8	8	9,2	136,13	0	12,813	121830000	26		0,920757	0,250367		0,336467653	0,963544592	-0,343072891		1,032151534	0,190408602	0,658429718		0,525077418	0,447658456	0,447258377		0,296062756	0,611401143	0,33731842		0,553565965	0,312661376	0,469251633	1	0	0	0	0	1	1	0	1
169	P73344	Slr1196 protein	slr1196	1		outer membrane-bounded periplasmic space [GO:0030288]		outer membrane-bounded periplasmic space [GO:0030288]	9	9	9	33,3	48,001	0	57,31	419970000	83		0,122834	0,887348		0,161374678	0,958	-0,079291153		0,126217891	0,841742641	0,063891983		0,08663282	0,92163	0,051741409		0,205594761	0,7792	-0,112236786		0,190838718	0,751996503	0,086996078	0	4	2	1	4	1	3	3	2
170	P73348	Rehydrin	slr1198	1	cell redox homeostasis [GO:0045454]	cell [GO:0005623]	identical protein binding [GO:0042802]; peroxiredoxin activity [GO:0051920]	cell [GO:0005623]; identical protein binding [GO:0042802]; peroxiredoxin activity [GO:0051920]; cell redox homeostasis [GO:0045454]	16	16	16	67,3	23,559	0	323,31	116890000000	483		0,297014	0,819248		0,483178406	0,954477876	-0,142559052		0,476466137	0,548743649	-0,165122223		1,036467595	0,372643478	-0,250780487		0,534791662	0,526467097	-0,190029526		0,675342139	0,388392157	-0,200307846	12	11	14	17	15	11	11	15	12
171	P73367	3-dehydroquinate dehydratase (3-dehydroquinase) (EC 4.2.1.10) (Type II DHQase)	aroQ sll1112	1	aromatic amino acid family biosynthetic process [GO:0009073]; chorismate biosynthetic process [GO:0009423]		3-dehydroquinate dehydratase activity [GO:0003855]	3-dehydroquinate dehydratase activity [GO:0003855]; aromatic amino acid family biosynthetic process [GO:0009073]; chorismate biosynthetic process [GO:0009423]	2	2	2	17,8	16,374	0	8,5843	229870000	19		0,294097	0,410091		0,410570723	1	0,551937866		0,419086159	0,458474898	0,53958168		0,663192769	0,355211137	0,729615784		0,187765082	0,736751249	0,295178223		0,045576422	0,911765808	-0,081930161	0	1	0	1	0	1	1	1	0
172	P73368	Magnesium transporter MgtE	mgtE	1		integral component of membrane [GO:0016021]; plasma membrane [GO:0005886]	magnesium ion transmembrane transporter activity [GO:0015095]; metal ion binding [GO:0046872]	integral component of membrane [GO:0016021]; plasma membrane [GO:0005886]; magnesium ion transmembrane transporter activity [GO:0015095]; metal ion binding [GO:0046872]	11	11	11	26,3	51,1	0	124,65	1311300000	156		0,201203	0,938932		0,35891149	0,933056604	-0,073324203		0,008591572	0,992600743	-0,002269745		0,52299782	0,71384	-0,080109406		0,760846741	0,51052973	-0,147909546		0,529901745	0,590166998	-0,095413589	5	4	6	5	3	3	8	4	6
173	P73392	Uncharacterized protein sll1735	sll1735	1		extracellular space [GO:0005615]		extracellular space [GO:0005615]	2	2	2	30,8	14,105	0	208,43	448030000	55		0,385889	0,401974		0,275718754	0,934070288	-0,373415375		0,836346909	0,282465409	0,410316849		0,801444619	0,39217154	0,294444656		0,416369981	0,582377358	0,187187195		0,330749131	0,5549875	0,224061584	2	2	1	1	2	2	2	2	0
174	P73406	Carbon dioxide-concentrating mechanism protein CcmK homolog 3	ccmK3 slr1838	1					2	2	2	18,4	11,003	0	44,07	526660000	30		0,307293	0,494647		0,363376102	0,958194757	0,262469864		1,025914822	0,208711111	0,548017883		0,962111225	0,309072165	0,510105515		0,044506853	0,942481334	0,060005951		0,193344648	0,702259624	0,14618721	0	1	1	1	1	1	1	1	0
175	P73411	Glucose-6-phosphate 1-dehydrogenase (G6PD) (EC 1.1.1.49)	zwf slr1843	1	glucose metabolic process [GO:0006006]; pentose-phosphate shunt [GO:0006098]		glucose-6-phosphate dehydrogenase activity [GO:0004345]; NADP binding [GO:0050661]	glucose-6-phosphate dehydrogenase activity [GO:0004345]; NADP binding [GO:0050661]; glucose metabolic process [GO:0006006]; pentose-phosphate shunt [GO:0006098]	25	25	25	54,4	57,885	0	323,31	10544000000	559		0,603451	0,499421		0,383048861	0,953907473	-0,202461624		0,947882738	0,24606	-0,444760132		0,791989737	0,354847775	-0,430871582		0,692297582	0,371422222	-0,372317123		0,767601642	0,253950509	-0,341529846	22	22	18	24	18	16	18	22	15
176	P73417	Histidinol-phosphate aminotransferase	hisC	1	cobalamin biosynthetic process [GO:0009236]		pyridoxal phosphate binding [GO:0030170]; transaminase activity [GO:0008483]	pyridoxal phosphate binding [GO:0030170]; transaminase activity [GO:0008483]; cobalamin biosynthetic process [GO:0009236]	2	2	2	11,4	38,932	0	5,1217	46950000	17		0,183796	0,559628		0,471863158	1	-0,44919548		0,624184963	0,344217163	-0,492086029		0,83979259	0,330167147	-0,536865616		0,199562857	0,735631951	-0,247922897		0,076324918	0,869972559	-0,080267715	0	0	0	0	0	0	1	1	0
177	P73418	DNA-binding protein HU	hup sll1712	1	chromosome condensation [GO:0030261]; regulation of nucleic acid-templated transcription [GO:1903506]	cytosol [GO:0005829]	DNA binding [GO:0003677]	cytosol [GO:0005829]; DNA binding [GO:0003677]; chromosome condensation [GO:0030261]; regulation of nucleic acid-templated transcription [GO:1903506]	14	14	14	78	10,891	0	323,31	32015000000	232		0,17851	0,795302		0,51843234	0,968904051	-0,18387146		0,451524235	0,543498829	-0,187155151		0,635053248	0,472091185	-0,235269547		1,079770591	0,310330789	-0,304417038		0,557178939	0,410394265	-0,231816483	6	12	7	8	8	9	11	10	5
178	P73420	Slr1535 protein	slr1535	1	carbohydrate metabolic process [GO:0005975]		catalytic activity [GO:0003824]	catalytic activity [GO:0003824]; carbohydrate metabolic process [GO:0005975]	11	11	11	21,9	55,017	0	54,7	1275800000	112		0,0692792	0,736077		0,547866649	1	0,371696472		0,396441009	0,499602015	0,382368469		0,017689883	0,983035633	-0,01353569		0,038179033	0,946615505	0,053912354		0,19575852	0,690546763	0,162572479	3	4	4	3	2	6	7	4	3
179	P73422	Slr1537 protein	slr1537	1			transferase activity, transferring glycosyl groups [GO:0016757]	transferase activity, transferring glycosyl groups [GO:0016757]	12	12	12	51,6	32,416	0	113,32	1512000000	194		0,279603	0,913286		0,135497726	0,965076655	0,029150772		0,248573127	0,799824561	0,051679993		0,120691202	0,92293112	0,031197357		0,424847931	0,669821313	0,106830978		0,862222686	0,370769614	0,169829941	6	7	4	6	5	5	6	5	6
180	P73425	Slr1541 protein	slr1541	1					4	4	4	28,1	24,188	0	12,667	1145800000	31		0,243069	0,552877		0,274148072	0,939434965	-0,184134293		0,818382174	0,254227488	-0,575690842		0,799674292	0,367964444	-0,377431107		0,176488894	0,797836004	-0,122336578		0,345639059	0,5451549	-0,222348022	2	0	2	1	1	0	0	1	1
181	P73434	Sll1466 protein	sll1466	1			transferase activity, transferring glycosyl groups [GO:0016757]	transferase activity, transferring glycosyl groups [GO:0016757]	6	6	6	16,9	47,141	0	9,7418	927880000	41		0,184297	0,829868		0,444124775	0,936540212	-0,115995407		0,411198307	0,599578485	-0,148166656		0,384452341	0,670039735	-0,13229599		0,682888784	0,521866667	-0,150473404		1,034169234	0,209073016	-0,284085464	2	0	1	1	1	1	3	1	0
182	P73436	UPF0061 protein sll1464	sll1464	1					5	5	5	18,9	54,04	0	25,57	250510000	58		0,543379	0,264402		0,216643571	0,930154263	-0,381939697		0,299923346	0,583427928	-0,365309525		0,357372305	0,557175866	-0,422876358		0,083804168	0,884805438	0,142677689		1,315188731	0,053316129	0,844516754	0	1	0	1	2	2	1	1	1
183	P73439	Sll1461 protein	sll1461	1					3	3	3	12,7	25,524	0	42,186	161240000	40		0,377375	0,428965		0,233725448	0,930487214	0,252759171		0,11160141	0,824494382	0,154573441		0,5658384	0,411893617	0,511548233		0,749732273	0,310786632	0,646718597		0,575459034	0,283676596	0,587552261	2	1	2	1	1	1	1	1	0
184	P73452	Nitrate transport protein NrtA	nrtA sll1450	1	nitrate assimilation [GO:0042128]; transport [GO:0006810]	plasma membrane [GO:0005886]	transporter activity [GO:0005215]	plasma membrane [GO:0005886]; transporter activity [GO:0005215]; nitrate assimilation [GO:0042128]; transport [GO:0006810]	29	29	29	55,2	48,966	0	323,31	31235000000	542		0,2916	0,805285		1,251139834	1	-0,195390701		1,034607192	0,352054608	-0,207394028		1,196571215	0,378985325	-0,20995636		0,333286407	0,67813617	-0,132922363		0,21685723	0,803432937	-0,047337341	13	19	18	22	18	15	19	21	21
185	P73462	Urease accessory protein UreE	ureE	1	enzyme active site formation [GO:0018307]; protein complex assembly [GO:0006461]; protein folding [GO:0006457]; urea metabolic process [GO:0019627]	cytoplasm [GO:0005737]	nickel cation binding [GO:0016151]; unfolded protein binding [GO:0051082]	cytoplasm [GO:0005737]; nickel cation binding [GO:0016151]; unfolded protein binding [GO:0051082]; enzyme active site formation [GO:0018307]; protein complex assembly [GO:0006461]; protein folding [GO:0006457]; urea metabolic process [GO:0019627]	4	4	4	35,9	15,867	0	12,848	153990000	58		0,0825631	0,868753		0,366009976	0,935350482	0,172993469		0,32804142	0,630397463	0,164753342		0,108006533	0,894126188	-0,075447083		0,065271557	0,933682002	0,03835907		0,051903594	0,918235659	0,033362198	2	3	2	1	1	2	2	3	2
186	P73468	Cytoplasmic membrane protein for maltose uptake	malK	1		plasma membrane [GO:0005886]	ATPase activity [GO:0016887]; ATP binding [GO:0005524]	plasma membrane [GO:0005886]; ATP binding [GO:0005524]; ATPase activity [GO:0016887]	6	6	6	23,5	45,183	0	61,727	586160000	96		0,0214855	0,990003		0,0927937	0,967986395	-0,031460571		0,173058258	0,817961872	-0,061365509		0,119374122	0,915488722	-0,036166		0,183464335	0,848371025	0,054494476		0,144761397	0,832877805	-0,049693298	4	4	3	2	4	3	3	2	2
187	P73469	Serine/threonine-protein kinase F (EC 2.7.11.1)	spkF slr1225	1			ATP binding [GO:0005524]; protein serine/threonine kinase activity [GO:0004674]	ATP binding [GO:0005524]; protein serine/threonine kinase activity [GO:0004674]	5	5	5	15,2	53,872	0	23,742	206930000	23		0,129232	0,700095		0,083285281	0,967598312	0,03270874		0,298088904	0,618646681	-0,22694397		0,016533088	0,98825416	0,008996582		0,299883542	0,65083956	-0,205038834		0,523067069	0,361927044	-0,366580963	0	1	0	0	0	0	1	0	0
188	P73472	Chloroplast import-associated channel IAP75	IAP75	1	intracellular protein transport [GO:0006886]	intracellular [GO:0005622]; outer membrane [GO:0019867]	P-P-bond-hydrolysis-driven protein transmembrane transporter activity [GO:0015450]	intracellular [GO:0005622]; outer membrane [GO:0019867]; P-P-bond-hydrolysis-driven protein transmembrane transporter activity [GO:0015450]; intracellular protein transport [GO:0006886]	18	18	18	27,3	92,306	0	323,31	1597100000	257		0,169024	0,724204		0,512246837	1	-0,281800079		0,492777164	0,488291933	-0,243655777		0,27658028	0,684948276	-0,206325531		0,038613316	0,953933074	0,029624557		0,358041017	0,542965153	-0,209952927	4	5	8	8	7	4	9	6	5
189	P73473	Peptide chain release factor 3 (RF-3)	prfC slr1228	1	translational termination [GO:0006415]	cytosol [GO:0005829]	GTPase activity [GO:0003924]; GTP binding [GO:0005525]; translation release factor activity, codon nonspecific [GO:0016150]	cytosol [GO:0005829]; GTP binding [GO:0005525]; GTPase activity [GO:0003924]; translation release factor activity, codon nonspecific [GO:0016150]; translational termination [GO:0006415]	15	15	15	37,8	61,189	0	145,92	2745700000	176		1,04024	0,308902		0,570275986	1	0,338416672		1,467133621	0,143892857	0,684216309		1,354858446	0,33635	0,643590927		0,784711374	0,314360976	0,510394669		0,832214867	0,192339434	0,453902817	1	3	2	1	4	6	4	5	2
190	P73482	Slr1235 protein	slr1235	1			hydrolase activity [GO:0016787]	hydrolase activity [GO:0016787]	3	3	3	18,4	32,776	0	11,513	122370000	17		0,379897	0,40317		0,304964301	0,944660988	0,32961731		0,529392005	0,382736518	0,516202927		0,368007561	0,544552803	0,438248444		0,10649449	0,853333333	-0,173672485		0,009899439	0,977188707	-0,013383102	1	1	0	0	0	0	0	0	0
191	P73488	Sll1130 protein	sll1130	1		plasma membrane-derived thylakoid photosystem II [GO:0030096]	DNA binding [GO:0003677]	plasma membrane-derived thylakoid photosystem II [GO:0030096]; DNA binding [GO:0003677]	16	16	16	100	12,933	0	323,31	75401000000	419		0,247367	0,664805		0,644425438	1	-0,354146957		0,645012749	0,382599388	-0,305296707		0,377293781	0,593056872	-0,225912094		0,812397034	0,33	-0,400461197		0,676144825	0,299578947	-0,320875931	14	13	15	15	15	11	11	15	17
192	P73492	Probable glutaredoxin ssr2061	ssr2061	1	cell redox homeostasis [GO:0045454]	cell [GO:0005623]	electron transfer activity [GO:0009055]; protein disulfide oxidoreductase activity [GO:0015035]	cell [GO:0005623]; electron transfer activity [GO:0009055]; protein disulfide oxidoreductase activity [GO:0015035]; cell redox homeostasis [GO:0045454]	6	6	6	73,9	9,7351	0	59,351	246840000	46		0,224876	0,440559		0,42120345	1	0,730261993		0,603514	0,3110625	0,913776398		0,427902338	0,472978462	0,764071655		0,115478136	0,83432701	0,26485405		0,519867461	0,294391245	0,787111664	1	2	1	1	1	2	2	1	1
193	P73505	Isoleucine--tRNA ligase (EC 6.1.1.5) (Isoleucyl-tRNA synthetase) (IleRS)	ileS sll1362	1	isoleucyl-tRNA aminoacylation [GO:0006428]	cytoplasm [GO:0005737]	aminoacyl-tRNA editing activity [GO:0002161]; ATP binding [GO:0005524]; isoleucine-tRNA ligase activity [GO:0004822]; metal ion binding [GO:0046872]; tRNA binding [GO:0000049]	cytoplasm [GO:0005737]; aminoacyl-tRNA editing activity [GO:0002161]; ATP binding [GO:0005524]; isoleucine-tRNA ligase activity [GO:0004822]; metal ion binding [GO:0046872]; tRNA binding [GO:0000049]; isoleucyl-tRNA aminoacylation [GO:0006428]	37	37	37	52,5	112,34	0	323,31	8798300000	471		0,199237	0,987539		0,03188667	0,992033665	-0,006129074		0,418750304	0,721086042	0,067464066		0,38576708	0,760628906	0,070484161		0,018059385	0,986770381	-0,003889084		0,04128398	0,964341906	-0,008077621	8	16	12	9	19	13	16	17	11
194	P73529	Sll1280 protein	sll1280	1	CAAX-box protein processing [GO:0071586]		metalloendopeptidase activity [GO:0004222]	metalloendopeptidase activity [GO:0004222]; CAAX-box protein processing [GO:0071586]	5	5	5	23,4	34,01	0	20,68	352460000	57		0,0560736	0,895214		0,125543735	0,957678873	0,065502548		0,133551779	0,833185312	0,071819305		0,248355884	0,752015936	0,125286484		0,189064787	0,775601533	-0,139332962		0,034307087	0,94460717	-0,023390198	0	3	1	1	1	3	2	1	0
195	P73533	ABC transporter	sll1276	1		integral component of membrane [GO:0016021]	ATPase activity, coupled to transmembrane movement of substances [GO:0042626]; ATP binding [GO:0005524]	integral component of membrane [GO:0016021]; ATP binding [GO:0005524]; ATPase activity, coupled to transmembrane movement of substances [GO:0042626]	7	7	7	16,9	59,009	0	49,565	264680000	68		0,570856	0,336517		0,30733349	0,951914286	0,391069031		0,706298354	0,275078261	0,727973938		0,809861422	0,312890365	0,80714798		0,630301812	0,350716667	0,66164856		0,407377562	0,419131455	0,465924072	0	1	0	0	3	1	3	1	0
196	P73534	Pyruvate kinase 2 (PK 2) (EC 2.7.1.40)	pyk2 sll1275	1	glycolytic process [GO:0006096]	cytosol [GO:0005829]	ATP binding [GO:0005524]; kinase activity [GO:0016301]; magnesium ion binding [GO:0000287]; potassium ion binding [GO:0030955]; pyruvate kinase activity [GO:0004743]	cytosol [GO:0005829]; ATP binding [GO:0005524]; kinase activity [GO:0016301]; magnesium ion binding [GO:0000287]; potassium ion binding [GO:0030955]; pyruvate kinase activity [GO:0004743]; glycolytic process [GO:0006096]	31	31	31	61,4	62,985	0	323,31	18942000000	626		0,0874532	1		0,04948077	0,989251362	0,008572388		0,046713455	0,974045524	0,006378174		0,206678591	0,925079208	0,02158699		0,628325245	0,768239845	0,051105499		0,387934375	0,718310559	0,057299423	14	21	16	20	22	19	25	20	18
197	P73541	Sll1273 protein	sll1273	1					12	12	12	33,1	53,975	0	108,66	1528500000	210		0,403545	0,700374		0,279437899	0,942788177	0,104642868		0,192929271	0,802078603	0,062878799		0,191300071	0,838423698	0,066360092		0,832062911	0,458204444	0,173148346		0,946837767	0,209269537	0,319937515	9	5	8	6	6	6	7	6	4
198	P73552	Sll0877 protein	sll0877	1					7	7	7	25	51,885	0	37,465	533360000	55		0,342332	0,506506		0,51695345	1	-0,493611908		0,283160299	0,661132457	-0,157237625		0,069407154	0,937111292	0,041034317		0,170277761	0,823526606	-0,089626312		0,11807993	0,831976783	0,066696167	1	4	1	2	1	1	1	1	0
199	P73553	Large-conductance mechanosensitive channel	mscL slr0875	1	cellular water homeostasis [GO:0009992]; ion transport [GO:0006811]	integral component of membrane [GO:0016021]; plasma membrane [GO:0005886]	mechanosensitive ion channel activity [GO:0008381]	integral component of membrane [GO:0016021]; plasma membrane [GO:0005886]; mechanosensitive ion channel activity [GO:0008381]; cellular water homeostasis [GO:0009992]; ion transport [GO:0006811]	5	5	5	35,2	15,805	0	87,658	1523600000	50		0,84879	0,220394		0,651778188	1	1,113376617		0,829005415	0,205459283	1,284654236		0,924210978	0,293317073	1,413005447		0,693484158	0,300054496	1,129909897		0,559803484	0,2556411	0,936857605	1	1	0	2	2	1	2	2	1
200	P73566	Slr0882 protein	slr0882	1		integral component of membrane [GO:0016021]		integral component of membrane [GO:0016021]	6	6	6	16	44,441	0	31,53	1014700000	67		0,344455	0,74261		0,195735514	0,953185345	-0,089414215		0,540116299	0,497777215	-0,198666763		0,530781643	0,534338295	-0,206755447		0,625281767	0,4722	-0,216276932		0,750959727	0,294101509	-0,280935287	0	3	1	0	1	4	3	0	0
201	P73577	Uncharacterized protein slr0889	slr0889	1			ATP binding [GO:0005524]; protein kinase activity [GO:0004672]	ATP binding [GO:0005524]; protein kinase activity [GO:0004672]	2	2	2	4,2	45,957	0,00055804	3,2455	704490000	46		0,646868	0,247216		0,285244153	0,951597846	-0,629124832		0,421393194	0,452633015	0,562646866		0,689527185	0,347720698	0,758205414		0,279815861	0,603864644	-0,555812073		0,404119512	0,416898345	0,504986572	2	3	1	1	1	1	2	2	1
202	P73584	Sll0862 protein	sll0862	1		integral component of membrane [GO:0016021]	metalloendopeptidase activity [GO:0004222]	integral component of membrane [GO:0016021]; metalloendopeptidase activity [GO:0004222]	5	5	5	12,5	54,401	0	39,78	485320000	45		0,470371	0,302405		0,098178409	0,962586207	-0,17528038		0,152462933	0,775093525	0,15080986		0,317226849	0,621288684	0,277725983		0,528614856	0,392653779	-0,7157341		0,753738865	0,173549738	-0,746131134	0	2	0	1	0	1	2	2	0
203	P73591	Sll1308 protein	sll1308	1			oxidoreductase activity [GO:0016491]	oxidoreductase activity [GO:0016491]	6	6	6	27	25,861	0	12,158	640310000	42		0,621393	0,244395		0,45346456	1	0,73530426		0,433328314	0,430409091	0,697483063		0,525214578	0,404065693	0,824852371		0,389676655	0,496283727	0,640500641		0,221126612	0,600723697	-0,615975189	1	1	2	1	0	1	4	2	2
204	P73592	Slr1406 protein	slr1406	1		outer membrane-bounded periplasmic space [GO:0030288]		outer membrane-bounded periplasmic space [GO:0030288]	2	2	2	29,3	18,752	0	69,665	298530000	42		0,151317	0,549378		0,173975512	0,931541667	0,249039841		0,319071668	0,54382243	0,488490677		0,997332969	0,288244898	0,782888794		0,433386724	0,472850575	0,519499588		0,61781346	0,262897547	0,548504639	1	1	1	0	1	2	1	0	1
205	P73596	Sll1307 protein	sll1307	1		outer membrane-bounded periplasmic space [GO:0030288]		outer membrane-bounded periplasmic space [GO:0030288]	6	6	6	50,3	17,849	0	15,518	559710000	37		0,450285	0,294294		0,242811761	0,930047619	-0,200638199		0,629534467	0,383105666	-0,320000076		0,384769687	0,587427885	-0,23089447		0,630620249	0,317061033	-1,175370407		0,955268421	0,091808219	-1,03531456	1	1	2	1	1	1	1	0	2
206	P73598	Sll1305 protein	sll1305	1			catalytic activity [GO:0003824]	catalytic activity [GO:0003824]	8	8	8	35,9	32,885	0	110,33	1633600000	147		0,198282	0,739042		0,187708426	0,955365957	-0,087399292		0,038731549	0,952486068	-0,02331543		0,117210721	0,902438356	-0,053240967		0,099220804	0,905565648	-0,041054916		0,609202441	0,330511749	-0,323233032	3	6	6	5	4	5	4	4	4
207	P73599	Probable ketose 3-epimerase (EC 5.1.3.-)	sll1304	1	carbohydrate metabolic process [GO:0005975]		isomerase activity [GO:0016853]; metal ion binding [GO:0046872]	isomerase activity [GO:0016853]; metal ion binding [GO:0046872]; carbohydrate metabolic process [GO:0005975]	6	6	6	20,6	32,848	0	44,855	1296500000	96		1,387	0,244988		0,249324127	0,932336794	0,097808838		0,039089337	0,952502326	-0,024064255		0,034636109	0,977292496	0,010308456		0,681224529	0,439117371	-0,241530609		1,372394941	0,054574132	-0,722797394	1	4	3	2	4	3	4	4	4
208	P73600	Sll1785 protein	sll1785	1		outer membrane-bounded periplasmic space [GO:0030288]	metal ion binding [GO:0046872]	outer membrane-bounded periplasmic space [GO:0030288]; metal ion binding [GO:0046872]	12	12	12	58,2	30,011	0	323,31	7155700000	265		0,993768	0,287939		0,057305714	0,988561462	-0,031269836		0,185709782	0,756811111	-0,129140091		0,337466732	0,732611621	-0,098312759		0,922909559	0,305974026	-0,398300934	+	1,5746182	0,037862595	-0,747327805	8	12	10	9	9	11	10	11	11
209	P73602	Uncharacterized protein sll1783	sll1783	1			catalytic activity [GO:0003824]	catalytic activity [GO:0003824]	5	5	5	32,7	16,822	0	172,02	1030300000	51		1,15959	0,170667		0,263766439	0,932899522	0,475032425		0,532567598	0,351911565	0,852816391		0,763709996	0,314437086	1,050636292		0,077121415	0,888498305	-0,212948227		0,589198263	0,224686244	-1,217471313	0	2	1	1	3	2	3	3	0
210	P73603	Slr1852 protein	slr1852	1					17	17	17	71,8	21,834	0	323,31	22077000000	450		0,24849	0,689191		0,091744486	0,964709565	0,043877411		0,045099677	0,948056559	-0,030172729		0,069461521	0,963608833	0,015656281		0,457414845	0,639451505	-0,118537903		0,719825727	0,288061798	-0,316411591	10	13	14	14	14	16	13	19	19
211	P73604	Slr1853 protein	slr1853	1			peroxiredoxin activity [GO:0051920]	peroxiredoxin activity [GO:0051920]	6	6	6	73,5	12,111	0	189,06	3505200000	134		0,11182	0,793176		0,045230197	0,991364821	-0,028466034		0,006826629	0,991612519	-0,005355072		0,111525423	0,90977027	-0,046343231		0,28995309	0,729666667	-0,11018486		0,612347379	0,332868661	-0,314201355	3	4	4	3	4	2	6	4	6
212	P73605	Slr1854 protein	slr1854	1					9	9	9	60,1	22,293	0	107,1	11093000000	190		0,600589	0,425204		0,102606362	0,961980054	0,063196564		0,029659775	0,964631741	0,02358284		0,267148296	0,790343662	0,074385452		0,456339877	0,604683721	-0,146118927		1,115297364	0,115591002	-0,470277023	3	9	5	5	7	5	8	8	4
213	P73606	Slr1855 protein	slr1855	1			catalytic activity [GO:0003824]	catalytic activity [GO:0003824]	27	27	27	57,3	70,003	0	323,31	12688000000	590		0,46623	0,530773		0,016665031	0,994080978	0,011136246		0,061983342	0,931405276	0,034032822		0,008408007	0,997431138	0,003678894		0,22159903	0,794891202	-0,085012054		0,861110215	0,198660033	-0,408335876	14	23	20	16	23	18	23	19	18
214	P73608	Glycogen operon protein GlgX	glgX	1	glycogen catabolic process [GO:0005980]		cation binding [GO:0043169]; glycogen debranching enzyme activity [GO:0004133]; hydrolase activity, hydrolyzing O-glycosyl compounds [GO:0004553]; transferase activity [GO:0016740]	cation binding [GO:0043169]; glycogen debranching enzyme activity [GO:0004133]; hydrolase activity, hydrolyzing O-glycosyl compounds [GO:0004553]; transferase activity [GO:0016740]; glycogen catabolic process [GO:0005980]	17	17	17	28,7	79,894	0	217,1	4546100000	283		0,799341	0,353636		0,277572942	0,930055191	0,143177795		0,129310715	0,834931298	0,070977402		0,447941092	0,649285231	0,125029755		0,051168172	0,945710692	-0,027182007		0,987702729	0,141274074	-0,466736984	6	10	8	7	10	6	9	10	11
215	P73626	Sll1771 protein	sll1771	1			protein serine/threonine phosphatase activity [GO:0004722]	protein serine/threonine phosphatase activity [GO:0004722]	19	19	19	77,2	28,472	0	323,31	3070700000	273		0,0497582	0,990003		0,013405681	0,995454819	0,00435791		0,224866056	0,771471014	0,075857925		0,089070084	0,937883117	0,027929306		0,091563824	0,923054427	-0,030290604		0,042017164	0,951473364	-0,012999725	6	7	6	8	12	4	7	9	6
216	P73627	Uncharacterized protein sll1770	sll1770	1			ATP binding [GO:0005524]; protein kinase activity [GO:0004672]	ATP binding [GO:0005524]; protein kinase activity [GO:0004672]	13	13	13	30,8	67,127	0	91,663	714330000	151		0,279738	0,646894		0,350277508	0,951810565	-0,269218826		0,14239358	0,831714531	0,06875		0,543979839	0,560657396	0,163479614		0,006855064	0,992651301	0,003494644		0,053438413	0,927301538	0,021955872	2	6	1	4	4	2	6	5	1
217	P73632	D-alanine--D-alanine ligase (EC 6.3.2.4) (D-Ala-D-Ala ligase) (D-alanylalanine synthetase)	ddl ddlA slr1874	1	cell wall organization [GO:0071555]; peptidoglycan biosynthetic process [GO:0009252]; regulation of cell shape [GO:0008360]	cytoplasm [GO:0005737]	ATP binding [GO:0005524]; D-alanine-D-alanine ligase activity [GO:0008716]; metal ion binding [GO:0046872]	cytoplasm [GO:0005737]; ATP binding [GO:0005524]; D-alanine-D-alanine ligase activity [GO:0008716]; metal ion binding [GO:0046872]; cell wall organization [GO:0071555]; peptidoglycan biosynthetic process [GO:0009252]; regulation of cell shape [GO:0008360]	9	9	9	31,9	38,774	0	105,54	2095700000	162		0,713041	0,902974		0,560021916	0,93496	-0,099129105		0,429934904	0,706917874	-0,07171669		0,073522884	0,964440598	-0,014208221		0,272626445	0,832910245	0,048801422		0,144329272	0,878571429	0,026876068	3	8	6	3	5	4	4	8	6
218	P73636	30S ribosomal protein S6	rpsF rps6 sll1767	1	translation [GO:0006412]	cytosolic small ribosomal subunit [GO:0022627]	small ribosomal subunit rRNA binding [GO:0070181]; structural constituent of ribosome [GO:0003735]	cytosolic small ribosomal subunit [GO:0022627]; small ribosomal subunit rRNA binding [GO:0070181]; structural constituent of ribosome [GO:0003735]; translation [GO:0006412]	10	10	10	86,7	13,237	0	282,82	5977400000	208		0,66137	0,444574		0,476252363	1	0,291364288		0,985739377	0,225466307	0,480257034		1,010722488	0,302158491	0,516611862		0,547194093	0,441532824	0,342586899		0,876070357	0,179127148	0,453591537	6	6	4	5	6	7	9	7	7
219	P73639	Uncharacterized protein sll1766	sll1766	1			4 iron, 4 sulfur cluster binding [GO:0051539]; metal ion binding [GO:0046872]; oxidoreductase activity [GO:0016491]	4 iron, 4 sulfur cluster binding [GO:0051539]; metal ion binding [GO:0046872]; oxidoreductase activity [GO:0016491]	2	2	2	9,5	45,702	0	49,16	84902000	34		0,121352	0,723886		0,515298644	1	-0,385641479		0,072586714	0,892605565	-0,080693054		0,033285812	0,9726875	0,027694321		0,113161281	0,866170026	-0,099835968		0,228300037	0,658787431	-0,164831161	0	0	1	1	1	1	1	0	0
220	P73650	High-affinity branched-chain amino acid transport ATP-binding protein BraG	livF	1			ATPase activity [GO:0016887]; ATP binding [GO:0005524]	ATP binding [GO:0005524]; ATPase activity [GO:0016887]	6	6	6	32,9	25,705	0	33,886	307220000	34		0,0341012	0,752243		0,416137953	1	-0,422372818		0,268133392	0,596661521	-0,506333923		0,428674766	0,482126126	-0,622515488		0,624437669	0,365284047	-0,546925735		0,269537258	0,669771689	-0,106656265	0	0	1	1	1	0	1	1	0
221	P73651	Riboflavin biosynthesis protein RibF [Includes: Riboflavin kinase (EC 2.7.1.26) (Flavokinase); FMN adenylyltransferase (EC 2.7.7.2) (FAD pyrophosphorylase) (FAD synthase)]	ribF slr1882	1	FAD biosynthetic process [GO:0006747]; FMN biosynthetic process [GO:0009398]; riboflavin biosynthetic process [GO:0009231]		ATP binding [GO:0005524]; FMN adenylyltransferase activity [GO:0003919]; riboflavin kinase activity [GO:0008531]	ATP binding [GO:0005524]; FMN adenylyltransferase activity [GO:0003919]; riboflavin kinase activity [GO:0008531]; FAD biosynthetic process [GO:0006747]; FMN biosynthetic process [GO:0009398]; riboflavin biosynthetic process [GO:0009231]	2	2	2	10,9	31,38	0	4,2804	110930000	18		0,099538	0,855306		0,033575953	0,989159055	0,018138123		0,005363347	0,992674591	0,003803635		0,219440627	0,789645951	0,095978928		0,188207007	0,798518797	-0,10421257		0,28652533	0,607082031	-0,178316879	0	0	0	0	0	0	1	0	0
222	P73652	Sll1757 protein	sll1757	1		integral component of membrane [GO:0016021]		integral component of membrane [GO:0016021]	10	10	10	36	31,717	0	323,31	3554400000	164		0,123678	0,97074		0,677770465	0,954666667	-0,106199646		0,804664197	0,562087156	-0,102179718		0,31827018	0,754381046	-0,086881638		0,577692464	0,618905359	-0,108486938		0,034042837	0,964135952	-0,009023285	7	5	5	2	6	3	4	3	6
223	P73654	Ssl3364 protein	ssl3364	1					5	5	5	56,8	8,2948	0	129,52	1438900000	75		0,123799	0,747544		0,701561323	1	-0,29919281		0,354078379	0,602607182	-0,179970169		0,592737393	0,425099656	-0,39126091		0,511190532	0,54961809	-0,17855072		0,301594998	0,600473373	-0,17297554	3	3	1	2	2	2	3	2	2
224	P73660	Porphobilinogen deaminase (PBG) (EC 2.5.1.61) (Hydroxymethylbilane synthase) (HMBS) (Pre-uroporphyrinogen synthase)	hemC slr1887	1	chlorophyll biosynthetic process [GO:0015995]; heme biosynthetic process [GO:0006783]; peptidyl-pyrromethane cofactor linkage [GO:0018160]; protoporphyrinogen IX biosynthetic process [GO:0006782]	cytoplasm [GO:0005737]	hydroxymethylbilane synthase activity [GO:0004418]	cytoplasm [GO:0005737]; hydroxymethylbilane synthase activity [GO:0004418]; chlorophyll biosynthetic process [GO:0015995]; heme biosynthetic process [GO:0006783]; peptidyl-pyrromethane cofactor linkage [GO:0018160]; protoporphyrinogen IX biosynthetic process [GO:0006782]	28	28	28	83,8	34,894	0	323,31	18598000000	573		0,130019	0,975764		0,117727202	0,96410327	0,029447556		0,862561589	0,494244275	0,130421066		0,363321932	0,727499487	0,094636154		0,479906032	0,702525	0,081586075		0,305703448	0,717821081	0,0665802	14	19	18	16	18	19	17	20	17
225	P73670	Processing protease	sll2008	1			metal ion binding [GO:0046872]; metalloendopeptidase activity [GO:0004222]	metal ion binding [GO:0046872]; metalloendopeptidase activity [GO:0004222]	3	3	3	7	47,976	0	56,548	260220000	32		0,481111	0,401026		0,593664152	1	0,430257797		0,81334095	0,252085919	0,597011185		0,087473574	0,902406838	0,108133698		0,798374939	0,299048649	0,602861404		0,436808408	0,422425234	0,351289368	0	1	0	0	3	2	1	2	0
226	P73679	Isopenicillin N epimerase	cefD	1			catalytic activity [GO:0003824]	catalytic activity [GO:0003824]	6	6	6	23,9	43,998	0	163,76	606680000	42		0,092653	0,896482		0,250051394	0,934113475	0,107689667		0,199824727	0,762835629	0,101158905		0,55999133	0,520164306	0,216383362		0,439825541	0,576939213	0,179867172		0,473428522	0,469938983	0,210995102	0	3	0	0	2	2	2	2	0
227	P73680	Sll2002 protein	sll2002	1			RNA binding [GO:0003723]	RNA binding [GO:0003723]	8	8	8	41,8	32,871	0	69,15	1152400000	74		0,468181	0,662396		0,598365659	1	0,222564697		0,301558061	0,653162218	0,155318451		0,982932207	0,339542857	0,342101288		0,90230422	0,349541053	0,294007111		0,541029144	0,453053837	0,190491486	3	1	1	1	1	2	1	1	1
228	P73685	Ssl3291 protein	ssl3291	1					2	2	2	12,8	10,666	0,0010793	2,4922	260920000	14		1,17302	0,216107		0,118715187	0,958718254	0,141507339		1,060492128	0,153067961	-1,0410923		0,458346	0,466982839	-0,580752945		0,192132369	0,746619469	0,206541061		0,030674202	0,941192661	0,045258713	0	0	1	1	0	0	0	0	0
229	P73690	Ycf51-like protein	sll1702	1					6	5	5	54,7	19,077	0	31,459	766460000	54		0,143277	0,827459		0,271618259	0,927663212	0,141890717		0,493950866	0,523507246	0,188729095		0,209530739	0,812543762	0,084505844		0,311061539	0,696622129	0,126941299		0,891219135	0,241715134	0,290251541	1	2	2	1	1	0	2	2	2
230	P73702	Sll1696 protein	sll1696	1					7	7	7	30,4	30,293	0	25,485	347140000	55		0,0478568	0,954644		0,080472973	0,963865979	-0,047378922		0,038919313	0,955829853	-0,020443726		0,080661366	0,931296631	0,041379166		0,173986895	0,830103731	-0,078394318		0,334917248	0,596	-0,148269653	1	2	2	5	3	1	1	2	1
231	P73706	Slr1818 protein	slr1818	1					3	3	3	18,4	23,289	0	22,054	126760000	30		0,0461414	0,953558		0,358775114	0,933206738	0,155513382		0,169004047	0,786484099	0,091029739		0,151815245	0,843604278	0,086545944		0,459262223	0,566624697	0,18172493		0,412550786	0,543040169	0,164146805	1	1	0	1	1	0	1	1	1
232	P73716	Slr1732 protein	slr1732	1					5	5	5	65,8	16,806	0	20,508	628340000	32		1,53825	0,147733		0,757177655	1	1,129415512		0,07388135	0,869711443	-0,227300644		1,366543798	0,324740741	1,649266434		1,363060796	0,242571429	1,642214966	+	1,299502836	0,036616601	1,590409088	0	0	0	1	0	0	1	1	1
233	P73719	Sll1628 protein	sll1628	1					6	6	6	19	43,103	0	37,48	547740000	126		0,0375984	0,961847		0,026578347	0,98926283	-0,0164608		0,269143467	0,706750484	-0,112068176		0,188312864	0,835279928	-0,069967651		0,20591374	0,820287029	-0,070608902		0,559145797	0,455822121	-0,179134369	3	4	4	4	5	3	7	3	4
234	P73722	Transcription regulator LexA (LexA-related repressor)	lexA sll1626	1	DNA replication [GO:0006260]; negative regulation of transcription, DNA-templated [GO:0045892]; positive regulation of transcription, DNA-templated [GO:0045893]; SOS response [GO:0009432]; transcription, DNA-templated [GO:0006351]	cytoplasm [GO:0005737]; protein-DNA complex [GO:0032993]	bacterial-type RNA polymerase transcriptional activator activity, sequence-specific DNA binding [GO:0001216]; bacterial-type RNA polymerase transcriptional repressor activity, sequence-specific DNA binding [GO:0001217]; sequence-specific DNA binding [GO:0043565]; serine-type endopeptidase activity [GO:0004252]; transcription regulatory region sequence-specific DNA binding [GO:0000976]	cytoplasm [GO:0005737]; protein-DNA complex [GO:0032993]; bacterial-type RNA polymerase transcriptional activator activity, sequence-specific DNA binding [GO:0001216]; bacterial-type RNA polymerase transcriptional repressor activity, sequence-specific DNA binding [GO:0001217]; sequence-specific DNA binding [GO:0043565]; serine-type endopeptidase activity [GO:0004252]; transcription regulatory reg…	20	20	20	80,3	22,744	0	323,31	54846000000	611		0,16494	0,807856		0,35224561	0,933955696	-0,177011871		0,826756624	0,400350148	-0,199084473		0,679289981	0,455762058	-0,243249512		1,051146928	0,363688623	-0,22772789		0,876682291	0,244218935	-0,293043518	14	23	15	23	25	19	16	22	21
235	P73728	Peroxiredoxin sll1621 (Prx) (EC 1.11.1.15) (Thioredoxin peroxidase)	sll1621	1	cell redox homeostasis [GO:0045454]	cell [GO:0005623]	identical protein binding [GO:0042802]; peroxidase activity [GO:0004601]; peroxiredoxin activity [GO:0051920]	cell [GO:0005623]; identical protein binding [GO:0042802]; peroxidase activity [GO:0004601]; peroxiredoxin activity [GO:0051920]; cell redox homeostasis [GO:0045454]	24	24	24	77,2	21,167	0	323,31	80583000000	512		0,000520038	1		0,010197083	0,995816817	-0,004272842		0,004154456	0,994254438	-0,001305771		0,061159202	0,965024352	-0,01560173		0,033293149	0,970453988	0,013355255		0,118017626	0,863730956	0,038983917	15	15	14	12	19	15	17	19	14
236	P73735	Demethylphylloquinone reductase NdbB (EC 1.6.5.12)	ndbB	1	phylloquinone biosynthetic process [GO:0042372]		oxidoreductase activity [GO:0016491]	oxidoreductase activity [GO:0016491]; phylloquinone biosynthetic process [GO:0042372]	8	8	8	23,3	44,488	0	106,14	1068300000	124		1,15339	0,332113		0,640966324	1	-0,316426086		1,183633017	0,18768	-0,490936279		1,098955538	0,291663158	-0,603630447		1,251586152	0,224330097	-0,503518677		0,600874555	0,34005641	-0,308418274	5	7	4	4	2	5	5	3	5
237	P73736	N-acetylmuramoyl-L-alanine amidase	amiA	1	peptidoglycan catabolic process [GO:0009253]	outer membrane-bounded periplasmic space [GO:0030288]	N-acetylmuramoyl-L-alanine amidase activity [GO:0008745]	outer membrane-bounded periplasmic space [GO:0030288]; N-acetylmuramoyl-L-alanine amidase activity [GO:0008745]; peptidoglycan catabolic process [GO:0009253]	14	14	14	29,7	70,011	0	262,25	3901800000	234		0,0217378	0,987563		0,193495298	0,954197425	-0,088165283		0,242101778	0,743261074	-0,096281433		0,188075689	0,810910102	-0,098816299		0,00091198	0,999509601	-0,000463486		0,23880817	0,694335426	-0,103413773	6	6	7	8	8	6	7	8	9
238	P73747	Chromophore lyase CpcS/CpeS 1 (EC 4.-.-.-)	cpcS1 sll0853	1	protein-phycocyanobilin linkage [GO:0017009]		lyase activity [GO:0016829]	lyase activity [GO:0016829]; protein-phycocyanobilin linkage [GO:0017009]	5	5	5	42,5	21,213	0	226,7	979270000	73		0,185215	0,444983		0,358644729	1	0,759905624		0,385272215	0,466785425	0,804644012		0,008840222	0,993329314	-0,032135773		0,374764382	0,499070539	0,78621254		0,378192159	0,413255648	0,796960449	2	3	1	1	2	1	3	3	2
239	P73761	Orotidine 5'-phosphate decarboxylase (EC 4.1.1.23) (OMP decarboxylase) (OMPDCase) (OMPdecase)	pyrF sll0838	1	'de novo' pyrimidine nucleobase biosynthetic process [GO:0006207]; 'de novo' UMP biosynthetic process [GO:0044205]	cytosol [GO:0005829]	orotidine-5'-phosphate decarboxylase activity [GO:0004590]	cytosol [GO:0005829]; orotidine-5'-phosphate decarboxylase activity [GO:0004590]; 'de novo' pyrimidine nucleobase biosynthetic process [GO:0006207]; 'de novo' UMP biosynthetic process [GO:0044205]	9	9	9	50,6	24,705	0	31,434	472330000	80		0,675567	0,491994		0,8927929	1	-0,36207962		0,778525955	0,310860465	-0,385340881		1,276084396	0,289903614	-0,492189789		0,564380479	0,470635838	-0,259123993		0,687666158	0,326682353	-0,265610886	1	4	3	2	3	2	4	5	2
240	P73762	Sll0837 protein	sll0837	1		outer membrane-bounded periplasmic space [GO:0030288]		outer membrane-bounded periplasmic space [GO:0030288]	11	11	11	45,9	32,906	0	153,2	1979100000	130		0,559338	0,659609		0,890271248	1	-0,276348114		1,072112556	0,256790698	-0,328292084		0,454181577	0,570367448	-0,192274094		0,884128224	0,364456693	-0,272093964		0,696595578	0,361507538	-0,218749619	3	6	2	4	4	3	7	4	2
241	P73765	Slr0869 protein	slr0869	1			GTPase activity [GO:0003924]	GTPase activity [GO:0003924]	20	20	20	32,8	92,531	0	143,74	921150000	190		0,0778042	0,757555		0,447789146	1	0,369302368		0,639230793	0,362377295	0,388638306		0,46636915	0,494736536	0,370096588		0,312672562	0,608970115	0,28983345		0,256593857	0,625401515	0,178575134	7	5	4	3	3	2	12	7	2
242	P73769	DNA mismatch repair protein MutS	mutS sll1165	1	mismatch repair [GO:0006298]	mismatch repair complex [GO:0032300]	ATP binding [GO:0005524]; damaged DNA binding [GO:0003684]; DNA-dependent ATPase activity [GO:0008094]; mismatched DNA binding [GO:0030983]	mismatch repair complex [GO:0032300]; ATP binding [GO:0005524]; damaged DNA binding [GO:0003684]; DNA-dependent ATPase activity [GO:0008094]; mismatched DNA binding [GO:0030983]; mismatch repair [GO:0006298]	18	18	18	26,5	97,585	0	190,53	989910000	134		0,465304	0,553865		0,533764343	1	-0,244966125		0,396858108	0,582135747	-0,179569626		0,862846968	0,370380744	-0,321561813		0,007520601	0,99233656	-0,004053116		0,117316176	0,832321992	0,067829132	4	6	1	0	5	3	5	0	1
243	P73776	Sll1159 protein	sll1159	1	cell redox homeostasis [GO:0045454]	cell [GO:0005623]	antioxidant activity [GO:0016209]; oxidoreductase activity [GO:0016491]	cell [GO:0005623]; antioxidant activity [GO:0016209]; oxidoreductase activity [GO:0016491]; cell redox homeostasis [GO:0045454]	3	3	3	21,1	24,751	0	44,035	271020000	98		0,294517	0,820182		0,206684709	0,957265097	-0,061549377		0,191481364	0,830525409	0,049000549		0,185141156	0,867547765	0,049261856		0,326080123	0,743687438	0,08361969		0,519958593	0,513040087	-0,14621315	1	4	4	1	4	5	4	5	2
244	P73790	Putative pterin-4-alpha-carbinolamine dehydratase (PHS) (EC 4.2.1.96) (4-alpha-hydroxy-tetrahydropterin dehydratase) (Pterin carbinolamine dehydratase) (PCD)	ssl2296	1	tetrahydrobiopterin biosynthetic process [GO:0006729]		4-alpha-hydroxytetrahydrobiopterin dehydratase activity [GO:0008124]	4-alpha-hydroxytetrahydrobiopterin dehydratase activity [GO:0008124]; tetrahydrobiopterin biosynthetic process [GO:0006729]	3	3	3	56,2	10,734	0	13,715	365840000	22		1,61603	0,164762		0,369705774	0,969907445	0,310420609		0,36903931	0,54790676	0,271197128		0,649499831	0,394073786	0,442582321		1,088343514	0,210890511	-1,242002869		0,436196964	0,373614907	-0,639332199	0	0	1	0	1	0	0	3	0
245	P73810	DNA topoisomerase 1 (EC 5.99.1.2) (DNA topoisomerase I) (Omega-protein) (Relaxing enzyme) (Swivelase) (Untwisting enzyme)	topA slr2058	1	DNA topological change [GO:0006265]		DNA binding [GO:0003677]; DNA topoisomerase type I activity [GO:0003917]; metal ion binding [GO:0046872]	DNA binding [GO:0003677]; DNA topoisomerase type I activity [GO:0003917]; metal ion binding [GO:0046872]; DNA topological change [GO:0006265]	34	34	34	48,7	99,339	0	323,31	9642700000	539		0,215009	0,926425		0,377525944	0,93827762	0,11520195		0,170719158	0,835694138	0,049010086		0,030464179	0,978490854	-0,009435654		0,216846559	0,827061187	-0,061956024		0,166473349	0,823631491	0,048241806	10	22	15	11	12	14	20	20	16
246	P73824	Hydroperoxy fatty acid reductase gpx2 (EC 1.11.1.22)	gpx2 slr1992	1	response to oxidative stress [GO:0006979]		glutathione peroxidase activity [GO:0004602]	glutathione peroxidase activity [GO:0004602]; response to oxidative stress [GO:0006979]	9	9	9	86,4	16,646	0	178,09	4490200000	174		0,22319	0,685254		0,849846356	1	-0,272076035		0,309194384	0,644153209	-0,159403229		0,125495038	0,88021584	-0,070567322		0,738460346	0,382896552	-0,30770607		0,039065655	0,934924731	0,031041336	4	5	5	4	6	3	4	7	4
247	P73826	Acetoacetyl-CoA reductase (EC 1.1.1.36)	phaB slr1994	1	poly-hydroxybutyrate biosynthetic process [GO:0042619]		acetoacetyl-CoA reductase activity [GO:0018454]	acetoacetyl-CoA reductase activity [GO:0018454]; poly-hydroxybutyrate biosynthetic process [GO:0042619]	11	11	11	62,9	25,333	0	152,64	2594200000	113		0,127639	0,894928		0,337542216	0,932088276	-0,125048065		0,229903522	0,753902985	-0,093135452		0,525513444	0,533788043	-0,21186676		0,340990035	0,666187702	-0,140579605		0,073496455	0,901156324	-0,032077408	1	4	2	2	1	5	5	4	3
248	P73829	Slr1998 protein	slr1998	1			FAD binding [GO:0071949]	FAD binding [GO:0071949]	5	5	5	14,8	48,216	0	19,697	318660000	25		1,86347	0,220945		0,585138228	1	0,4195961		0,993755069	0,199578947	0,638718414		1,122012213	0,291660131	0,698921967		1,264055561	0,210870968	0,795000076		1,157797005	0,074992519	0,715215302	0	1	0	0	0	0	0	0	0
249	P73832	Cyanophycinase (EC 3.4.15.6)	cphB slr2001	1	cellular macromolecule metabolic process [GO:0044260]		protein homodimerization activity [GO:0042803]; serine-type peptidase activity [GO:0008236]	protein homodimerization activity [GO:0042803]; serine-type peptidase activity [GO:0008236]; cellular macromolecule metabolic process [GO:0044260]	9	9	9	36,9	29,389	0	214,4	3670000000	186		0,173308	0,982451		0,038312886	0,989175561	-0,008574295		0,039257153	0,971089802	0,008228302		1,187039933	0,535743658	0,108534622		0,098162211	0,945467717	0,01500473		0,267876127	0,832397351	0,031666183	3	8	3	7	5	5	10	6	3
250	P73846	Uncharacterized protein slr1717	slr1717	1					6	6	6	19,4	30,174	0	48,815	718930000	109		0,0203697	0,988167		0,075842266	0,966641829	-0,040419769		0,028044344	0,970262595	0,013380051		0,066981401	0,945475541	0,02931366		0,221174391	0,794965779	-0,087392044		0,177178363	0,791234188	-0,064306259	2	4	2	2	3	3	3	3	3
251	P73852	Slr1721 protein	slr1721	1		integral component of membrane [GO:0016021]		integral component of membrane [GO:0016021]	12	12	12	37,6	54,409	0	89,415	488290000	72		0,00988789	0,996502		0,779545227	0,963084813	-0,114099121		0,524391298	0,697722656	-0,067970276		0,357255372	0,767527378	-0,069374466		0,141223878	0,864975439	-0,063641739		0,141890921	0,838748142	-0,046251678	3	3	0	1	3	1	2	3	0
252	P73853	IMP dehydrogenase subunit	guaB	1	GTP biosynthetic process [GO:0006183]	cytoplasm [GO:0005737]	IMP dehydrogenase activity [GO:0003938]	cytoplasm [GO:0005737]; IMP dehydrogenase activity [GO:0003938]; GTP biosynthetic process [GO:0006183]	31	31	31	83,5	40,234	0	323,31	41603000000	815		0,143559	0,986712		0,336826873	0,94520614	0,058236313		0,625723152	0,631068493	0,086863327		0,52520029	0,717361169	0,07779274		0,540857885	0,656139434	0,094355011		0,579806741	0,589389055	0,090403748	24	28	27	24	26	24	27	26	28
253	P73862	Rubisco operon transcriptional regulator	rbcR	1	transcription, DNA-templated [GO:0006351]		DNA binding [GO:0003677]; DNA binding transcription factor activity [GO:0003700]	DNA binding [GO:0003677]; DNA binding transcription factor activity [GO:0003700]; transcription, DNA-templated [GO:0006351]	18	18	18	57	35,696	0	149,02	2143300000	205		0,747432	0,345991		0,292556144	0,930511078	0,207609177		1,177245637	0,177034221	0,532108307		1,322469396	0,298829932	0,493107605		1,215922048	0,214911111	0,617996979		0,995139268	0,12846332	0,519600677	5	7	4	4	9	3	7	6	2
254	P73881	Coenzyme A biosynthesis bifunctional protein CoaBC (DNA/pantothenate metabolism flavoprotein) [Includes: Phosphopantothenoylcysteine decarboxylase (PPCDC) (EC 4.1.1.36) (CoaC); Phosphopantothenate--cysteine ligase (EC 6.3.2.5) (CoaB) (PPC synthetase) (PPCS) (Phosphopantothenoylcysteine synthase)]	coaBC dfp sll0250	1	coenzyme A biosynthetic process [GO:0015937]; pantothenate catabolic process [GO:0015941]		FMN binding [GO:0010181]; phosphopantothenate--cysteine ligase activity [GO:0004632]; phosphopantothenoylcysteine decarboxylase activity [GO:0004633]	FMN binding [GO:0010181]; phosphopantothenate--cysteine ligase activity [GO:0004632]; phosphopantothenoylcysteine decarboxylase activity [GO:0004633]; coenzyme A biosynthetic process [GO:0015937]; pantothenate catabolic process [GO:0015941]	11	11	11	32,8	43,419	0	30,412	459970000	69		0,203261	0,923096		0,431550962	0,933446009	0,129077911		0,125501772	0,869093621	0,042969894		0,028360479	0,979291603	-0,010579681		0,090544782	0,917613061	-0,034820938		0,112598394	0,872405797	-0,035669327	3	2	3	1	2	2	2	3	1
255	P73885	Ribosome biogenesis GTPase A	slr0267	1	ribosome biogenesis [GO:0042254]	cytoplasm [GO:0005737]	GTPase activity [GO:0003924]; GTP binding [GO:0005525]	cytoplasm [GO:0005737]; GTP binding [GO:0005525]; GTPase activity [GO:0003924]; ribosome biogenesis [GO:0042254]	4	4	4	22,9	31,201	0	30,276	276010000	36		0,13972	0,874317		0,220501277	0,953566702	0,072306061		0,322482052	0,660558704	0,12749939		0,268787021	0,743245737	0,11857872		0,048646551	0,954897516	0,017819977		0,195686281	0,741841828	-0,092589951	1	2	1	1	1	1	3	0	0
256	P73886	Ribosome-binding ATPase YchF	ychF sll0245	1		cytoplasm [GO:0005737]	ATPase activity [GO:0016887]; ATP binding [GO:0005524]; GTP binding [GO:0005525]; ribosomal large subunit binding [GO:0043023]; ribosome binding [GO:0043022]	cytoplasm [GO:0005737]; ATP binding [GO:0005524]; ATPase activity [GO:0016887]; GTP binding [GO:0005525]; ribosomal large subunit binding [GO:0043023]; ribosome binding [GO:0043022]	22	22	22	66,4	39,317	0	323,31	9717000000	471		0,290311	0,951621		0,206334332	0,955832195	-0,048129272		0,244262425	0,852521739	0,031707764		0,508056502	0,753869048	0,064094925		0,567020106	0,67824359	0,083428574		0,896192816	0,573237614	0,07874527	12	18	11	11	15	14	15	15	10
257	P73921	Sll1979 protein	sll1979	1					6	6	6	57,7	15,946	0	144,14	1149700000	116		0,00677692	0,995176		0,057979179	0,9882457	-0,023209381		0,040890013	0,961139768	-0,015760803		0,087182596	0,932242028	-0,034017944		0,005386703	0,995120357	0,002845383		0,18959126	0,75338918	0,08626976	1	2	3	4	5	1	3	4	3
258	P73922	D-fructose 1,6-bisphosphatase class 2/sedoheptulose 1,7-bisphosphatase (FBPase class 2/SBPase) (EC 3.1.3.11) (EC 3.1.3.37)	slr2094	1	fructose 1,6-bisphosphate metabolic process [GO:0030388]; gluconeogenesis [GO:0006094]; glycerol metabolic process [GO:0006071]; reductive pentose-phosphate cycle [GO:0019253]	cytosol [GO:0005829]	fructose 1,6-bisphosphate 1-phosphatase activity [GO:0042132]; metal ion binding [GO:0046872]; sedoheptulose-bisphosphatase activity [GO:0050278]	cytosol [GO:0005829]; fructose 1,6-bisphosphate 1-phosphatase activity [GO:0042132]; metal ion binding [GO:0046872]; sedoheptulose-bisphosphatase activity [GO:0050278]; fructose 1,6-bisphosphate metabolic process [GO:0030388]; gluconeogenesis [GO:0006094]; glycerol metabolic process [GO:0006071]; reductive pentose-phosphate cycle [GO:0019253]	31	31	31	81,7	37,074	0	323,31	197080000000	863		0,38308	0,770334		0,487237474	0,932132075	-0,116114807		1,138098184	0,287047619	-0,257684326		0,954339815	0,403701275	-0,216218948		0,918518015	0,410773333	-0,198957443		0,442765686	0,563938588	-0,128609085	20	31	23	28	28	27	34	30	25
259	P73928	Regulatory components of sensory transduction system	slr2100	1	phosphorelay signal transduction system [GO:0000160]	intracellular [GO:0005622]		intracellular [GO:0005622]; phosphorelay signal transduction system [GO:0000160]	3	3	3	9,8	40,698	0	4,3408	294520000	23		0,703981	0,332513		1,020039012	1	-0,808784485		0,920921203	0,355696459	-0,227207947		1,290621377	0,32672	-0,286138916		0,879849976	0,393302817	-0,228187561		0,657918174	0,280643875	-0,402054977	2	1	1	0	1	1	0	1	0
260	P73930	Signal recognition particle receptor FtsY (SRP receptor)	ftsY slr2102	1	SRP-dependent cotranslational protein targeting to membrane [GO:0006614]	cytoplasm [GO:0005737]; plasma membrane [GO:0005886]	GTP binding [GO:0005525]	cytoplasm [GO:0005737]; plasma membrane [GO:0005886]; GTP binding [GO:0005525]; SRP-dependent cotranslational protein targeting to membrane [GO:0006614]	8	8	8	26	53,869	0	81,936	3386400000	142		0,561725	0,779253		0,945800458	1	-0,223968887		1,050688274	0,374844302	-0,184911346		0,332635758	0,753841584	-0,084304047		1,134382778	0,394183746	-0,182468414		0,417750563	0,636146617	-0,086079025	4	6	4	4	5	4	4	5	4
261	P73935	Adenine phosphoribosyltransferase (APRT) (EC 2.4.2.7)	apt sll1430	1	adenine salvage [GO:0006168]; AMP salvage [GO:0044209]; purine ribonucleoside salvage [GO:0006166]	cytoplasm [GO:0005737]	adenine phosphoribosyltransferase activity [GO:0003999]	cytoplasm [GO:0005737]; adenine phosphoribosyltransferase activity [GO:0003999]; adenine salvage [GO:0006168]; AMP salvage [GO:0044209]; purine ribonucleoside salvage [GO:0006166]	7	7	7	63,4	18,997	0	279,4	2203900000	167		0,117163	0,956783		0,184157156	0,958598394	0,061836243		0,012602475	0,986990291	-0,004507828		0,146763711	0,895516825	-0,045219803		0,160296568	0,868545613	-0,04948616		0,306551383	0,657388889	-0,101291656	4	6	4	6	6	2	7	5	3
262	P73939	Slr1503 protein	slr1503	1			oxidoreductase activity [GO:0016491]	oxidoreductase activity [GO:0016491]	6	6	6	24,2	36,512	0	12,039	271330000	34		0,189076	0,498604		0,083002915	0,959927667	0,122976303		0,341700936	0,585310962	0,230748367		0,361376818	0,539430851	-0,548622894		0,075581596	0,901362126	0,090478897		0,525385132	0,385493857	0,303256989	1	3	1	0	0	1	2	1	0
263	P73943	Slr1505 protein	slr1505	1					8	8	8	50,5	22,551	0	48,384	636480000	80		0,715092	0,574027		0,944276818	1	0,311603165		0,526004297	0,518499391	0,179328156		0,509052376	0,557191816	0,182852936		0,411373725	0,607622555	0,162005997		0,075907263	0,893829114	-0,038360214	1	3	3	2	3	2	3	2	2
264	P73944	Sll1424 protein	sll1424	1		integral component of membrane [GO:0016021]		integral component of membrane [GO:0016021]	6	6	6	18,9	55,645	0	9,5388	139480000	43		0,180018	0,595808		0,027424552	0,990562112	-0,013754272		0,439439763	0,503475	0,273821259		0,410184646	0,538351387	-0,326799011		0,217632292	0,740119403	-0,160636139		0,124023388	0,797998295	-0,120875931	1	1	1	0	2	1	2	3	2
265	P73950	Phosphate acyltransferase (EC 2.3.1.n2) (Acyl-ACP phosphotransacylase) (Acyl-[acyl-carrier-protein]--phosphate acyltransferase) (Phosphate-acyl-ACP acyltransferase)	plsX slr1510	1	fatty acid biosynthetic process [GO:0006633]; phospholipid biosynthetic process [GO:0008654]	cytoplasm [GO:0005737]	transferase activity, transferring acyl groups other than amino-acyl groups [GO:0016747]	cytoplasm [GO:0005737]; transferase activity, transferring acyl groups other than amino-acyl groups [GO:0016747]; fatty acid biosynthetic process [GO:0006633]; phospholipid biosynthetic process [GO:0008654]	14	14	14	55,2	37,285	0	167,47	3097700000	201		0,394583	0,827381		0,210608977	0,959716567	0,052007294		0,881464886	0,476400527	0,139504623		0,708670757	0,516492132	0,168213272		0,91255798	0,399342466	0,210647583		1,152500826	0,331130208	0,158424759	5	6	4	5	5	6	7	5	3
266	P73953	Slr1512 protein	slr1512	1		integral component of membrane [GO:0016021]		integral component of membrane [GO:0016021]	10	10	10	23	39,647	0	323,31	758650000	77		0,781759	0,211714		0,679075398	1	0,900700378		0,431901259	0,409950073	1,071289444		1,075817464	0,293465347	1,280543518		0,799060827	0,243831418	1,834251785	+	2,50742882	0,0108	3,035460281	0	0	1	2	2	0	0	1	2
267	P73954	Membrane-associated protein slr1513	slr1513	1		plasma membrane [GO:0005886]; thylakoid membrane [GO:0042651]		plasma membrane [GO:0005886]; thylakoid membrane [GO:0042651]	8	8	8	55,5	12,007	0	92,362	2130700000	88		0,355768	0,314705		0,008488079	0,996187311	0,024536514		0,818189862	0,223261364	0,918470383		1,421097903	0,320941176	1,093693924		0,597146468	0,353369072	0,811252213		1,067288212	0,068738786	1,121073151	0	5	1	1	3	1	3	2	1
268	P73963	HglK	hglK	1					3	3	3	19,2	26,541	0	33,446	354960000	28		0,589276	0,265148		0,050975666	0,987840796	0,039464951		0,755847721	0,236403101	-1,027822495		0,565699961	0,387173228	-0,795676804		0,259352811	0,704366285	-0,166962051		0,11966808	0,817780017	-0,086929703	2	1	3	1	0	1	1	2	2
269	P73989	Slr2122 protein	slr2122	1					4	4	4	32,4	25,816	0	47,431	527860000	63		0,103946	0,830531		0,418637592	0,936901734	0,109370422		0,425854546	0,563243986	0,179066467		0,095444925	0,906745964	0,068743515		1,10945212	0,363879032	0,218462753		0,738172588	0,294092896	0,287162018	2	0	1	2	1	1	2	2	0
270	P73997	3-dehydroquinate synthase (DHQS) (EC 4.2.3.4)	aroB slr2130	1	aromatic amino acid family biosynthetic process [GO:0009073]; chorismate biosynthetic process [GO:0009423]	cytoplasm [GO:0005737]	3-dehydroquinate synthase activity [GO:0003856]; metal ion binding [GO:0046872]; nucleotide binding [GO:0000166]	cytoplasm [GO:0005737]; 3-dehydroquinate synthase activity [GO:0003856]; metal ion binding [GO:0046872]; nucleotide binding [GO:0000166]; aromatic amino acid family biosynthetic process [GO:0009073]; chorismate biosynthetic process [GO:0009423]	10	10	10	46,5	38,854	0	209,02	1776900000	178		0,730173	0,827527		0,936714676	1	-0,173157883		1,25872499	0,316007634	-0,207993698		0,800901695	0,556956743	-0,120365906		0,627161386	0,568293269	-0,127440262		0,499941863	0,599968473	-0,094665909	3	5	5	4	5	3	7	6	4
271	P74002	Metalloprotease slr1322 (EC 3.4.-.-)	slr1322	1		cytosol [GO:0005829]	metallopeptidase activity [GO:0008237]	cytosol [GO:0005829]; metallopeptidase activity [GO:0008237]	25	25	25	50,1	53,129	0	323,31	5762500000	524		0,181318	0,943065		0,004080223	0,997908012	-0,00136795		0,369332698	0,751613146	-0,06220665		0,000925127	1	0,000221252		0,439893357	0,653438251	-0,112599564		0,811934476	0,47638796	-0,118614197	17	19	15	17	12	12	18	17	17
272	P74018	Hydrogenase large subunit	hoxH	1			ferredoxin hydrogenase activity [GO:0008901]; nickel cation binding [GO:0016151]	ferredoxin hydrogenase activity [GO:0008901]; nickel cation binding [GO:0016151]	10	10	10	25,7	52,917	0	97,333	1455800000	188		0,07852	0,934385		0,11098283	0,960547748	0,05175705		0,24233292	0,752472795	-0,089665222		0,028985829	0,975207982	0,015636063		0,309811435	0,713405961	-0,112483597		0,225509249	0,719978761	-0,089861298	2	7	5	6	5	7	6	5	5
273	P74024	Hydrogenase subunit	hoxF	1			4 iron, 4 sulfur cluster binding [GO:0051539]; FMN binding [GO:0010181]; metal ion binding [GO:0046872]; NADH dehydrogenase (ubiquinone) activity [GO:0008137]	4 iron, 4 sulfur cluster binding [GO:0051539]; FMN binding [GO:0010181]; metal ion binding [GO:0046872]; NADH dehydrogenase (ubiquinone) activity [GO:0008137]	8	8	8	23,6	57,774	0	65,055	491470000	116		0,569127	0,448335		0,604929477	1	-0,310339737		0,905955443	0,254723005	-0,442667389		0,726536218	0,369333333	-0,46003418		1,406279427	0,214571429	-0,551836014		1,095371384	0,115483607	-0,488135147	2	6	5	3	1	5	5	6	3
274	P74030	Sll1217 protein	sll1217	1					7	7	7	37,3	25,604	0	36,323	776450000	50		0,587101	0,505825		0,226950228	0,932409302	-0,117536926		0,900693487	0,283258947	-0,358362198		0,943843861	0,331139665	-0,399373627		0,783457831	0,350260504	-0,368210983		0,846572281	0,215315542	-0,36799202	2	2	2	1	3	3	1	1	2
275	P74033	Slr0806 protein	slr0806	1			flavin adenine dinucleotide binding [GO:0050660]; oxidoreductase activity, acting on CH-OH group of donors [GO:0016614]	flavin adenine dinucleotide binding [GO:0050660]; oxidoreductase activity, acting on CH-OH group of donors [GO:0016614]	10	10	10	31,4	47,989	0	29,985	504510000	80		0,565492	0,461401		0,132000244	0,958015564	0,083270645		0,002572588	0,994794682	-0,001234818		0,085296711	0,921025812	0,053248215		0,334196702	0,647545254	-0,169171524		1,359590247	0,089394919	-0,43122139	0	6	1	2	1	2	4	4	2
276	P74042	Sll0815 protein	sll0815	1					6	6	6	27,3	30,368	0	28,307	381810000	66		0,468938	0,291663		0,434267315	0,992446512	0,291648483		0,251235068	0,669557344	0,190878677		0,015771984	0,98247041	-0,023006058		0,271210543	0,622421769	-0,438772964		0,621762168	0,212556082	-1,045931244	3	2	1	2	2	1	3	3	3
277	P74060	Putative sulfur carrier protein slr0821	slr0821	1					7	7	7	84,4	11,694	0	86,291	5736000000	159		0,11689	0,937197		0,02172923	0,993218845	0,005720139		0,019431037	0,98275696	0,006181335		0,162448914	0,901789203	0,037552261		0,098677812	0,923495935	-0,028120422		0,383628272	0,575843216	-0,139635086	4	5	4	7	7	6	5	5	6
278	P74063	Photosystem I assembly protein Ycf3	ycf3 slr0823	1	photosynthesis [GO:0015979]	thylakoid membrane [GO:0042651]		thylakoid membrane [GO:0042651]; photosynthesis [GO:0015979]	8	8	8	71,1	19,878	0	164,3	1088200000	143		0,135528	0,924492		0,174602598	0,961791388	-0,047809601		0,360351093	0,703192233	-0,083647537		0,201024703	0,821608022	-0,075616455		1,469227534	0,368415385	-0,171826172		0,670670206	0,432602549	-0,162915421	3	6	3	3	6	4	6	7	4
279	P74067	Ssl1498 protein	ssl1498	1		integral component of membrane [GO:0016021]		integral component of membrane [GO:0016021]	2	2	2	29,5	6,3993	0	3,6916	328190000	5		0,250068	0,360785		0,690203339	1	-0,752371597		1,293051744	0,158594595	-1,375783157		0,745766707	0,325694268	-1,015147018		0,868789497	0,240901186	-1,129957581	+	1,245861569	0,046597222	-1,2799366	0	0	0	0	0	1	0	0	0
280	P74069	NAD(P)H-quinone oxidoreductase subunit N (EC 1.6.5.-) (NAD(P)H dehydrogenase I subunit N) (NDH-1 subunit N) (NDH-N)	ndhN sll1262	1		thylakoid membrane [GO:0042651]	oxidoreductase activity, acting on NAD(P)H, quinone or similar compound as acceptor [GO:0016655]; quinone binding [GO:0048038]	thylakoid membrane [GO:0042651]; oxidoreductase activity, acting on NAD(P)H, quinone or similar compound as acceptor [GO:0016655]; quinone binding [GO:0048038]	7	7	7	54	17,629	0	241,59	2755300000	159		0,175966	0,95456		0,535640997	0,93585	0,083647919		0,038145553	0,971595437	-0,008109665		0,757269247	0,594992908	0,104951477		0,131194804	0,900200167	0,034746933		0,503119616	0,564147541	0,113966751	4	3	4	4	5	4	4	6	5
281	P74070	Elongation factor Ts (EF-Ts)	tsf sll1261	1		cytoplasm [GO:0005737]	translation elongation factor activity [GO:0003746]	cytoplasm [GO:0005737]; translation elongation factor activity [GO:0003746]	25	25	25	79,8	24,231	0	323,31	28309000000	699		0,787468	0,383248		0,588661218	1	0,2874897		1,212359325	0,159381974	0,591265488		1,213463545	0,291931429	0,519362259		0,655067007	0,394200692	0,345302963		0,65594428	0,304219839	0,329636002	12	24	20	19	23	17	23	20	21
282	P74104	Riboflavin biosynthesis protein RibBA [Includes: 3,4-dihydroxy-2-butanone 4-phosphate synthase (DHBP synthase) (EC 4.1.99.12); GTP cyclohydrolase-2 (EC 3.5.4.25) (GTP cyclohydrolase II)]	ribBA ribA sll1894	1	riboflavin biosynthetic process [GO:0009231]		3,4-dihydroxy-2-butanone-4-phosphate synthase activity [GO:0008686]; GTP binding [GO:0005525]; GTP cyclohydrolase II activity [GO:0003935]; metal ion binding [GO:0046872]	3,4-dihydroxy-2-butanone-4-phosphate synthase activity [GO:0008686]; GTP binding [GO:0005525]; GTP cyclohydrolase II activity [GO:0003935]; metal ion binding [GO:0046872]; riboflavin biosynthetic process [GO:0009231]	11	11	11	22,3	61,681	0	114,2	1001400000	128		0,156322	0,922963		0,117502973	0,960907104	-0,052728653		0,328046286	0,672264529	0,114348984		0,323714768	0,729590164	0,105725098		0,010315779	0,990859701	0,004003143		0,003733707	0,993524372	0,001564407	1	6	3	3	4	3	4	7	1
283	P74111	Hybrid sensory kinase	slr1969	1	protein-chromophore linkage [GO:0018298]	intracellular [GO:0005622]	phosphorelay sensor kinase activity [GO:0000155]	intracellular [GO:0005622]; phosphorelay sensor kinase activity [GO:0000155]; protein-chromophore linkage [GO:0018298]	3	3	3	4,9	83,989	0	4,7028	1240000000	54		0,916271	0,536615		1,203911372	1	-0,331378555		1,201038617	0,224438503	-0,344949341		0,852060873	0,398583804	-0,25594368		1,014044069	0,338468085	-0,264577103		1,489974789	0,096072072	-0,362957001	1	2	1	1	4	1	2	2	2
284	P74120	GTPase Der (GTP-binding protein EngA)	der engA slr1974	1	ribosome biogenesis [GO:0042254]		GTP binding [GO:0005525]	GTP binding [GO:0005525]; ribosome biogenesis [GO:0042254]	12	12	12	40,9	50,825	0	131,46	1376400000	148		0,576196	0,875796		0,317148985	0,937877828	-0,069071579		0,653699797	0,517533981	-0,142391205		0,411207037	0,756240394	-0,070229721		0,088686742	0,941831746	-0,018354034		0,202614072	0,818312605	0,043116379	3	4	5	4	3	3	4	4	3
285	P74136	Membrane bound protein LytR	lytR	1					6	6	6	17,7	50,774	0	31,81	693740000	87		0,138489	0,942955		0,090134837	0,969863751	-0,027723694		0,368894319	0,754684015	-0,059601212		0,853246952	0,52136338	-0,140352249		0,049937884	0,954538103	0,018074417		0,044309516	0,963273549	0,007236862	1	3	2	2	3	2	2	2	2
286	P74139	Regulatory components of sensory transduction system	slr1983	1		intracellular [GO:0005622]	phosphorelay sensor kinase activity [GO:0000155]	intracellular [GO:0005622]; phosphorelay sensor kinase activity [GO:0000155]	9	9	9	21,6	66,707	0	45,811	466210000	88		0,0546766	0,813082		0,414160726	1	0,362002182		0,291567406	0,597030837	0,32684021		0,252059564	0,684602384	0,286489868		0,379760781	0,543989886	0,340808868		0,387092241	0,456063781	0,377986145	0	3	1	2	2	0	4	5	3
287	P74144	Sll1866 protein	sll1866	1	regulation of translational fidelity [GO:0006450]; tRNA threonylcarbamoyladenosine modification [GO:0002949]	cytoplasm [GO:0005737]	double-stranded RNA binding [GO:0003725]; nucleotidyltransferase activity [GO:0016779]; tRNA binding [GO:0000049]	cytoplasm [GO:0005737]; double-stranded RNA binding [GO:0003725]; nucleotidyltransferase activity [GO:0016779]; tRNA binding [GO:0000049]; regulation of translational fidelity [GO:0006450]; tRNA threonylcarbamoyladenosine modification [GO:0002949]	5	5	5	39,7	21,634	0	9,3723	227400000	18		0,926614	0,223615		0,531481881	1	-0,669085312		0,382877002	0,49615756	-0,464359665		1,317060684	0,299243243	-1,513811111		0,884758997	0,238370968	-1,082577515		0,434382393	0,379185185	-0,600002289	0	1	2	2	2	0	0	1	1
288	P74148	Universal stress protein Sll1388 (USP Sll1388)	sll1388	1	response to stress [GO:0006950]			response to stress [GO:0006950]	6	6	6	23,4	17,292	0	20,509	354800000	19		0,283458	0,363121		0,605080503	1	-0,673870087		0,03019716	0,965694551	-0,018167877		0,361558395	0,54185098	-0,491845322		0,809862577	0,270583607	-0,903847122		0,794610222	0,134621469	-1,008926773	1	1	1	0	1	0	1	1	0
289	P74152	Precorrin isomerase	slr1467	1	cobalamin biosynthetic process [GO:0009236]		precorrin-8X methylmutase activity [GO:0016993]	precorrin-8X methylmutase activity [GO:0016993]; cobalamin biosynthetic process [GO:0009236]	4	4	4	29,7	24,62	0	13,55	366630000	58		0,59678	0,525915		0,344562621	0,936499239	-0,161552811		0,899668041	0,272043956	-0,389112854		0,435310246	0,569458591	-0,208048248		0,549026478	0,469786237	-0,28055687		1,006405204	0,148569343	-0,427635193	2	2	1	2	2	2	2	2	2
290	P74155	Membrane protein insertase YidC (Alb3) (Foldase YidC) (Membrane integrase YidC) (Membrane protein YidC) (Oxa1) (SynYidC)	yidC alb3 slr1471	1	protein insertion into membrane [GO:0051205]; protein transport [GO:0015031]	integral component of membrane [GO:0016021]; plasma membrane [GO:0005886]		integral component of membrane [GO:0016021]; plasma membrane [GO:0005886]; protein insertion into membrane [GO:0051205]; protein transport [GO:0015031]	16	16	16	41,4	42,626	0	323,31	5321900000	192		0,446977	0,82126		0,237810851	0,95458547	0,066755676		0,52325788	0,633273486	-0,09447403		0,537222953	0,638304	-0,112163544		0,769384053	0,516639366	-0,140488434		0,311296398	0,665195572	-0,094803238	7	9	8	8	4	4	4	4	7
291	P74157	Sll1384 protein	sll1384	1					14	14	14	43,9	34,545	0	176,71	2953700000	199		0,287202	0,730659		0,283519365	0,933455471	-0,120314026		0,791812419	0,377539906	-0,235775375		0,76154956	0,467530516	-0,197860718		0,594925028	0,473156835	-0,233880234		1,078148941	0,180369231	-0,317410278	7	7	7	6	7	9	6	6	7
292	P74165	Beta-monoglucosyldiacylglycerol synthase (Beta-MGS) (MGlcDAG synthase) (EC 2.4.1.336) (UDP-glucose:1,2-diacylglycerol 3-beta-D-glucosyltransferase)	sll1377	1	glycerol metabolic process [GO:0006071]; membrane lipid biosynthetic process [GO:0046467]	integral component of membrane [GO:0016021]	magnesium ion binding [GO:0000287]; transferase activity, transferring hexosyl groups [GO:0016758]	integral component of membrane [GO:0016021]; magnesium ion binding [GO:0000287]; transferase activity, transferring hexosyl groups [GO:0016758]; glycerol metabolic process [GO:0006071]; membrane lipid biosynthetic process [GO:0046467]	6	6	6	18	54,134	0	24,69	327070000	45		0,00362818	0,988592		0,235639149	0,932160188	-0,11781311		0,083736172	0,875799177	-0,078734207		0,286670773	0,68804721	-0,182257843		0,049315009	0,944745656	-0,03379631		0,009674275	0,980513734	-0,007807922	1	2	2	2	2	3	1	3	1
293	P74178	Uncharacterized protein sll1178	sll1178	1	biosynthetic process [GO:0009058]		transferase activity [GO:0016740]	transferase activity [GO:0016740]; biosynthetic process [GO:0009058]	18	18	18	31,4	69,141	0	154,89	2204000000	225		0,474997	0,558027		0,357192098	0,936414474	0,193180084		0,524583007	0,484549935	0,227889633		0,881144668	0,366360802	0,322153854		0,618213654	0,439920368	0,271717072		0,090865008	0,865705977	-0,054556656	2	10	3	5	9	9	8	8	6
294	P74182	Slr1270 protein	slr1270	1	transport [GO:0006810]	outer membrane-bounded periplasmic space [GO:0030288]	identical protein binding [GO:0042802]; transporter activity [GO:0005215]	outer membrane-bounded periplasmic space [GO:0030288]; identical protein binding [GO:0042802]; transporter activity [GO:0005215]; transport [GO:0006810]	13	13	13	39,5	57,734	0	96,514	730860000	79		0,310238	0,701857		0,513956887	1	-0,245512772		0,666434784	0,37956875	-0,300544739		0,177705571	0,812442791	-0,112023163		0,296422684	0,674104813	-0,168146133		0,669477807	0,3096	-0,307222748	2	4	3	1	2	0	4	3	1
295	P74183	UDP-N-acetyl-D-mannosaminuronic acid transferase	rffM	1	biosynthetic process [GO:0009058]		transferase activity, transferring glycosyl groups [GO:0016757]	transferase activity, transferring glycosyl groups [GO:0016757]; biosynthetic process [GO:0009058]	4	4	4	19,5	28,126	0	21,018	370380000	88		0,119364	0,895876		0,128852784	0,961022901	-0,070270157		0,612896607	0,509825338	0,157464218		0,211361575	0,821684018	0,071652222		0,345465005	0,728700611	0,091294479		0,169684542	0,793300341	0,066241455	3	3	2	2	3	3	3	4	1
296	P74184	Slr1272 protein	slr1272	1					9	9	9	46,1	28,029	0	115,35	492680000	125		0,101232	0,806412		0,434552631	0,964236735	-0,224416351		0,27567948	0,669865055	-0,154779053		0,129145113	0,85179078	-0,110409546		0,084283633	0,89866223	-0,068613052		0,575238294	0,343759898	-0,329259872	2	0	8	4	3	1	4	2	4
297	P74186	Membrane protein	pilM	1					17	17	17	49,6	40,879	0	251,94	4215500000	240		0,52955	0,515389		0,221018261	0,933322314	-0,133984756		0,812553067	0,314269231	-0,347866058		1,234674583	0,29034555	-0,473731232		0,640554766	0,409494137	-0,32538414		0,621466169	0,33739871	-0,294926834	8	8	6	7	8	7	9	9	9
298	P74202	Slr1287 protein	slr1287	1					7	7	7	39,3	35,927	0	43,177	277870000	56		0,0220322	0,889427		0,214311181	0,932018561	-0,130225754		0,111496195	0,835456706	-0,101372147		0,388813586	0,612703963	0,186336517		0,081171071	0,887888702	-0,129653549		0,224549772	0,679408885	0,132815552	1	2	1	1	2	1	0	2	1
299	P74208	CTP synthase (EC 6.3.4.2) (Cytidine 5'-triphosphate synthase) (Cytidine triphosphate synthetase) (CTP synthetase) (CTPS) (UTP--ammonia ligase)	pyrG sll1443	1	'de novo' CTP biosynthetic process [GO:0044210]; glutamine metabolic process [GO:0006541]		ATP binding [GO:0005524]; CTP synthase activity [GO:0003883]; metal ion binding [GO:0046872]	ATP binding [GO:0005524]; CTP synthase activity [GO:0003883]; metal ion binding [GO:0046872]; 'de novo' CTP biosynthetic process [GO:0044210]; glutamine metabolic process [GO:0006541]	16	16	16	50,4	61,514	0	323,31	3600900000	330		0,200631	0,975452		0,262964081	0,952728435	-0,060739517		0,563253372	0,701346304	-0,064523697		0,071587849	0,964009412	0,013732529		0,266794387	0,839493761	0,04482193		0,340785152	0,758602954	-0,048677826	5	8	8	9	12	9	9	10	10
300	P74214	Signal recognition particle protein (Fifty-four homolog)	ffh slr1531	1	SRP-dependent cotranslational protein targeting to membrane [GO:0006614]	signal recognition particle [GO:0048500]	7S RNA binding [GO:0008312]; GTPase activity [GO:0003924]; GTP binding [GO:0005525]	signal recognition particle [GO:0048500]; 7S RNA binding [GO:0008312]; GTP binding [GO:0005525]; GTPase activity [GO:0003924]; SRP-dependent cotranslational protein targeting to membrane [GO:0006614]	21	21	21	52,1	52,145	0	323,31	5881500000	340		1,08388	0,499894		0,394869395	0,936089744	0,152127838		1,122658714	0,249046455	0,329059601		1,2123723	0,302046875	0,385030365		0,919196052	0,329473684	0,314495087		0,905814424	0,255228986	0,264591599	3	15	7	7	11	9	11	12	6
301	P74216	Penicillin-binding protein 1B	mrcA	1			penicillin binding [GO:0008658]; transferase activity [GO:0016740]	penicillin binding [GO:0008658]; transferase activity [GO:0016740]	11	11	11	21,5	70,274	0	29,472	622540000	107		0,0657224	0,935542		0,009654327	0,996102179	0,004979324		0,311987119	0,671200803	-0,123588181		0,35266337	0,675263965	-0,142745209		0,047514619	0,950607338	-0,023351669		0,030250655	0,956343204	0,016408539	3	3	3	3	3	2	4	3	1
302	P74246	Uncharacterized oxidoreductase slr1167 (EC 1.1.-.-)	slr1167	1			metal ion binding [GO:0046872]; oxidoreductase activity, acting on CH-OH group of donors [GO:0016614]	metal ion binding [GO:0046872]; oxidoreductase activity, acting on CH-OH group of donors [GO:0016614]	8	8	8	29,1	41,188	0	14,11	376120000	40		0,0700804	0,923239		0,862897631	1	0,199501038		0,45188419	0,527818399	0,208744049		0,23800206	0,757031496	0,124766159		0,717893183	0,497553398	0,165648651		0,401162497	0,596364356	0,117391586	1	0	1	0	0	1	3	0	0
303	P74250	Hydroperoxy fatty acid reductase gpx1 (EC 1.11.1.22)	gpx1 slr1171	1	response to oxidative stress [GO:0006979]		glutathione peroxidase activity [GO:0004602]	glutathione peroxidase activity [GO:0004602]; response to oxidative stress [GO:0006979]	9	9	9	74,6	18,452	0	100,53	833030000	53		0,147632	0,725169		0,16353449	0,955136268	-0,101815796		0,108443658	0,852960669	0,071949387		0,28117436	0,710224101	0,158612823		0,013042482	0,987223476	-0,00878067		0,3426283	0,522066738	0,285080338	4	3	1	0	0	1	2	0	0
304	P74251	Sll1089 protein	sll1089	1		outer membrane-bounded periplasmic space [GO:0030288]		outer membrane-bounded periplasmic space [GO:0030288]	4	4	4	30,5	23,491	0	28,012	1293000000	78		0,843432	0,387832		0,939400578	1	-0,504454041		0,799485946	0,281034188	-0,465801239		0,84516265	0,336054795	-0,484124374		0,858643136	0,293653631	-0,523291779		0,655055199	0,283609065	-0,395946503	4	4	3	2	2	2	1	3	2
305	P74254	Slr1173 protein	slr1173	1					6	6	6	16,8	52,541	0	72,659	226210000	23		0,834309	0,222263		0,142368109	0,954124341	0,160549927		0,550902616	0,355344595	-0,674536896		0,6476844	0,379875	-0,545552444		0,480478981	0,412744646	-0,829082489	+	1,63602924	0,023492958	-1,50867424	0	0	2	0	0	1	1	4	1
306	P74257	Glycerol-3-phosphate dehydrogenase (EC 1.1.5.3)	glpD sll1085	1	glycerol-3-phosphate metabolic process [GO:0006072]; glycerol metabolic process [GO:0006071]	glycerol-3-phosphate dehydrogenase complex [GO:0009331]	sn-glycerol-3-phosphate:ubiquinone-8 oxidoreductase activity [GO:0052591]	glycerol-3-phosphate dehydrogenase complex [GO:0009331]; sn-glycerol-3-phosphate:ubiquinone-8 oxidoreductase activity [GO:0052591]; glycerol metabolic process [GO:0006071]; glycerol-3-phosphate metabolic process [GO:0006072]	4	4	4	9,9	61,574	0	19,621	131480000	22		0,446932	0,326919		0,226254972	0,928607465	0,213285446		0,265512174	0,631014737	0,275541687		0,50451445	0,47270229	0,373984146		0,010722784	0,985818455	0,012919617		1,03181225	0,075547912	1,041833115	0	1	1	0	0	0	1	0	0
307	P74273	Sll1563 protein	sll1563	1					12	12	12	15,1	107,19	0	24,55	711570000	91		0,621029	0,571487		0,665312514	1	-0,188114929		0,769709313	0,4202886	-0,197066879		0,173754089	0,839917784	-0,072593689		0,000754471	0,998389381	-0,000336075		0,38981303	0,555411887	0,163612366	3	2	3	2	2	2	3	1	2
308	P74275	Delta-1-pyrroline-5-carboxylate dehydrogenase	putA	1	proline catabolic process to glutamate [GO:0010133]		1-pyrroline-5-carboxylate dehydrogenase activity [GO:0003842]; DNA binding transcription factor activity [GO:0003700]; proline dehydrogenase activity [GO:0004657]	1-pyrroline-5-carboxylate dehydrogenase activity [GO:0003842]; DNA binding transcription factor activity [GO:0003700]; proline dehydrogenase activity [GO:0004657]; proline catabolic process to glutamate [GO:0010133]	43	43	43	59	110,03	0	323,31	11286000000	774		0,203327	0,984639		0,247133699	0,960492248	0,040029144		0,0246405	0,982592481	0,004917908		0,528384644	0,697455319	0,085063553		0,042978038	0,96841814	0,011397934		0,711549537	0,55711272	0,093771744	15	30	17	20	22	21	29	28	24
309	P74283	Hydrogenase component	ssl3044	1			electron transfer activity [GO:0009055]; iron-sulfur cluster binding [GO:0051536]	electron transfer activity [GO:0009055]; iron-sulfur cluster binding [GO:0051536]	6	6	6	49,5	10,818	0	45,355	1354800000	59		0,741248	0,430443		0,391794905	0,935341935	-0,156934738		0,211849316	0,762583026	-0,094257355		0,003579258	1	0,001323318		0,036801475	0,957762974	-0,024397659		0,953161279	0,180226415	0,382824326	2	2	1	2	1	1	2	2	2
310	P74286	Succinyl-CoA synthetase	sucD	1	metabolic process [GO:0008152]		catalytic activity [GO:0003824]; cofactor binding [GO:0048037]	catalytic activity [GO:0003824]; cofactor binding [GO:0048037]; metabolic process [GO:0008152]	5	5	5	31,1	32,252	0	72,411	425570000	51		0,800424	0,244762		0,172263551	0,932724706	0,315961456		0,918354466	0,206064935	0,783167648		1,563432827	0,308545455	1,139989853		0,880757771	0,257538462	0,772792053	+	1,440552722	0,034413223	1,098366928	1	2	0	2	2	2	2	2	0
311	P74288	Hybrid sensory kinase	sll1555	1		intracellular [GO:0005622]	phosphorelay sensor kinase activity [GO:0000155]	intracellular [GO:0005622]; phosphorelay sensor kinase activity [GO:0000155]	7	7	7	26,6	41,472	0	82,577	507880000	86		0,694004	0,33558		0,42528267	0,980262443	0,294887161		0,56461625	0,394186186	0,376712799		1,337992273	0,315227273	0,650092697		0,2433802	0,704058212	0,195257568		0,090898962	0,847799836	-0,090895081	1	5	1	1	1	1	4	2	1
312	P74290	Formamidopyrimidine-DNA glycosylase (Fapy-DNA glycosylase) (EC 3.2.2.23) (DNA-(apurinic or apyrimidinic site) lyase MutM) (AP lyase MutM) (EC 4.2.99.18)	mutM fpg slr1689	1	base-excision repair [GO:0006284]; nucleotide-excision repair [GO:0006289]		class I DNA-(apurinic or apyrimidinic site) lyase activity [GO:0140078]; class III/IV DNA-(apurinic or apyrimidinic site) lyase activity [GO:0140080]; damaged DNA binding [GO:0003684]; oxidized purine nucleobase lesion DNA N-glycosylase activity [GO:0008534]; zinc ion binding [GO:0008270]	class I DNA-(apurinic or apyrimidinic site) lyase activity [GO:0140078]; class III/IV DNA-(apurinic or apyrimidinic site) lyase activity [GO:0140080]; damaged DNA binding [GO:0003684]; oxidized purine nucleobase lesion DNA N-glycosylase activity [GO:0008534]; zinc ion binding [GO:0008270]; base-excision repair [GO:0006284]; nucleotide-excision repair [GO:0006289]	9	9	9	36,9	32,061	0	62,253	1903600000	84		0,662321	0,412842		0,184270581	0,939813126	-0,133556366		0,520646197	0,453645777	-0,286823273		0,889116765	0,336474394	-0,425639343		0,995534739	0,251678832	-0,577068329		0,598043989	0,330904824	-0,334615707	2	2	2	1	3	4	5	4	2
313	P74294	PatA subfamily	slr1693	1	phosphorelay signal transduction system [GO:0000160]	intracellular [GO:0005622]		intracellular [GO:0005622]; phosphorelay signal transduction system [GO:0000160]	13	13	13	39,7	43,673	0	126,76	1597100000	192		0,641518	0,716665		0,765489518	1	-0,146787262		0,603196021	0,499919598	-0,170160675		0,821850576	0,496069565	-0,157616806		0,38025447	0,735663968	-0,080708313		0,18525971	0,780195876	0,067667007	6	7	6	5	6	6	5	8	5
314	P74295	Activator of photopigment and puc expression	slr1694	1			blue light photoreceptor activity [GO:0009882]; FAD binding [GO:0071949]; identical protein binding [GO:0042802]	blue light photoreceptor activity [GO:0009882]; FAD binding [GO:0071949]; identical protein binding [GO:0042802]	5	5	5	52	17,342	0	128,63	1221600000	55		0,0881693	0,954132		0,414949945	0,93086217	-0,116076279		0,071207326	0,932469274	-0,026392365		0,055785135	0,963133176	-0,019100189		0,418545238	0,665697624	-0,110406113		0,060743566	0,913599376	0,030822754	0	2	0	0	1	2	1	2	2
315	P74297	Serine/threonine-protein kinase B (EC 2.7.11.1)	spkB slr1697	1			ATP binding [GO:0005524]; protein serine/threonine kinase activity [GO:0004674]	ATP binding [GO:0005524]; protein serine/threonine kinase activity [GO:0004674]	19	19	19	43	63,079	0	132,35	1356800000	178		0,0265722	1		0,001558845	0,997864106	-0,000485229		0,369643765	0,716490421	-0,074821472		0,037262049	0,976792655	-0,009538651		0,014748162	0,988780269	-0,00381546		0,057053747	0,940828113	-0,013608932	5	5	7	3	5	4	4	7	3
316	P74298	NarL subfamily	sll0921	1	phosphorelay signal transduction system [GO:0000160]; regulation of transcription, DNA-templated [GO:0006355]; transcription, DNA-templated [GO:0006351]	intracellular [GO:0005622]	DNA binding [GO:0003677]	intracellular [GO:0005622]; DNA binding [GO:0003677]; phosphorelay signal transduction system [GO:0000160]; regulation of transcription, DNA-templated [GO:0006355]; transcription, DNA-templated [GO:0006351]	6	6	6	30,6	24,165	0	42,976	495460000	58		0,0784951	0,632589		0,093311373	0,961319392	-0,211528778		0,114121033	0,809470383	0,213889313		0,06505921	0,920800667	-0,167198944		0,336549564	0,550725	0,511149979		0,230620667	0,607613659	0,371909332	2	3	3	1	1	1	1	0	1
317	P74302	Slr0937 protein	slr0937	1					4	4	4	16,8	46,1	0	43,052	361770000	60		1,00448	0,224041		0,831899147	1	0,964840317		0,877923849	0,199735974	1,004889679		0,056812027	0,931937705	0,129569244		0,955067063	0,225516588	1,07926712		0,889032478	0,1075	1,031378555	0	2	0	1	5	0	2	2	2
318	P74303	Slr0938 protein	slr0938	1	biosynthetic process [GO:0009058]		ATP binding [GO:0005524]	ATP binding [GO:0005524]; biosynthetic process [GO:0009058]	14	14	14	40,5	50,226	0	96,345	1675300000	175		0,0326983	0,98714		0,146765556	0,957888683	-0,04746666		0,142654713	0,873732231	0,035530853		0,000394033	0,999085546	0,000144958		0,099203052	0,917742251	0,030916214		0,371794961	0,656040778	-0,084604263	4	5	4	6	7	3	8	4	6
319	P74305	Protease	pqqE	1		outer membrane-bounded periplasmic space [GO:0030288]	metal ion binding [GO:0046872]; metalloendopeptidase activity [GO:0004222]	outer membrane-bounded periplasmic space [GO:0030288]; metal ion binding [GO:0046872]; metalloendopeptidase activity [GO:0004222]	15	15	15	38,7	59,588	0	277,06	1590900000	154		0,411115	0,629073		0,516749362	1	-0,222896576		1,117403405	0,242183673	-0,348900223		1,139926783	0,314666667	-0,354781342		0,821041483	0,35802863	-0,320257187		0,756013876	0,290970793	-0,285549545	3	9	7	4	3	5	6	5	2
320	P74307	Slr0941 protein	slr0941	1					4	4	4	34,7	17,215	0	50,685	371700000	45		0,185199	0,75896		0,520073833	0,969830645	-0,164414597		0,67470369	0,523975816	-0,135520935		0,116135015	0,890936797	-0,068658066		0,762774909	0,373785311	-0,314516068		0,780006772	0,320603675	-0,23029213	0	2	3	2	1	0	2	2	1
321	P74309	Fructose-bisphosphate aldolase class 1 (EC 4.1.2.13) (Fructose-bisphosphate aldolase class I) (FBP aldolase)	fda fbaB slr0943	1	glycolytic process [GO:0006096]		fructose-bisphosphate aldolase activity [GO:0004332]	fructose-bisphosphate aldolase activity [GO:0004332]; glycolytic process [GO:0006096]	6	6	6	27,3	33,149	0	75,104	1581700000	73		0,665451	0,307019		0,448479439	1	-0,442624664		0,885042932	0,22056	-0,695400238		0,999301086	0,292729282	-0,841009521		0,815595554	0,2761	-0,7819561		0,909928027	0,115088296	-0,80904541	3	3	3	4	2	2	4	2	3
322	P74314	OmpR subfamily	slr0947	1	phosphorelay signal transduction system [GO:0000160]; regulation of transcription, DNA-templated [GO:0006355]; transcription, DNA-templated [GO:0006351]	intracellular [GO:0005622]	DNA binding [GO:0003677]	intracellular [GO:0005622]; DNA binding [GO:0003677]; phosphorelay signal transduction system [GO:0000160]; regulation of transcription, DNA-templated [GO:0006355]; transcription, DNA-templated [GO:0006351]	17	17	17	64,5	26,264	0	323,31	11350000000	458		0,316477	0,950067		0,204500636	0,960811374	0,040130615		0,160760607	0,874313531	0,031977844		0,134236865	0,922710853	0,028292084		0,577366799	0,646715556	-0,096082687		0,107294905	0,89773913	-0,024287415	11	18	16	11	15	13	17	14	13
323	P74315	Slr0948 protein	slr0948	1		integral component of membrane [GO:0016021]		integral component of membrane [GO:0016021]	8	8	8	50,7	23,83	0	36,618	372920000	63		0,587702	0,251244		0,503581048	1	-0,379291534		0,616783318	0,314971209	-0,751879501		0,199303297	0,820530165	-0,078041077		0,866701863	0,31140665	-0,434233856		1,038417604	0,06837037	-1,30155983	0	3	2	0	1	2	5	2	1
324	P74316	Sll0913 protein	sll0913	1					2	2	2	9,5	22,997	0	7,5281	146240000	43		0,319342	0,423858		1,321856066	1	0,865746307		0,24436241	0,669483417	0,205109406		0,325656595	0,605856639	0,304242325		0,49064887	0,447073684	0,43965416		0,184292731	0,67922323	0,242977142	2	0	0	1	0	1	2	3	1
325	P74319	Slr0950 protein	slr0950	1			methyltransferase activity [GO:0008168]; RNA binding [GO:0003723]	methyltransferase activity [GO:0008168]; RNA binding [GO:0003723]	2	2	2	9,5	30,026	0	5,0942	77450000	16		0,312007	0,583012		0,838685368	1	-0,491470337		0,446221187	0,509636816	-0,254293442		0,191084954	0,76548891	-0,17796936		0,617582908	0,411960133	-0,343398285		0,328313087	0,564831804	-0,199662018	0	1	0	0	0	1	1	0	0
326	P74324	Fructose-1,6-bisphosphatase class 1 (FBPase class 1) (EC 3.1.3.11) (D-fructose-1,6-bisphosphate 1-phosphohydrolase class 1)	fbp slr0952	1	fructose 1,6-bisphosphate metabolic process [GO:0030388]; fructose 6-phosphate metabolic process [GO:0006002]; fructose metabolic process [GO:0006000]; gluconeogenesis [GO:0006094]; reductive pentose-phosphate cycle [GO:0019253]; sucrose biosynthetic process [GO:0005986]	cytosol [GO:0005829]	fructose 1,6-bisphosphate 1-phosphatase activity [GO:0042132]; metal ion binding [GO:0046872]	cytosol [GO:0005829]; fructose 1,6-bisphosphate 1-phosphatase activity [GO:0042132]; metal ion binding [GO:0046872]; fructose 1,6-bisphosphate metabolic process [GO:0030388]; fructose 6-phosphate metabolic process [GO:0006002]; fructose metabolic process [GO:0006000]; gluconeogenesis [GO:0006094]; reductive pentose-phosphate cycle [GO:0019253]; sucrose biosynthetic process [GO:0005986]	11	11	11	42,1	38,262	0	177,17	1426000000	152		0,663452	0,700748		0,521197723	0,933984544	-0,105508041		0,925917613	0,381290123	-0,195104218		0,908944938	0,392848249	-0,248563766		0,833348021	0,511678474	-0,139255524		0,008191641	0,990136296	-0,002251434	3	4	4	4	4	4	7	7	4
327	P74338	NAD(P)H-quinone oxidoreductase subunit M (EC 1.6.5.-) (NAD(P)H dehydrogenase I subunit M) (NDH-1 subunit M) (NDH-M)	ndhM slr1623	1		thylakoid membrane [GO:0042651]	oxidoreductase activity, acting on NAD(P)H, quinone or similar compound as acceptor [GO:0016655]; quinone binding [GO:0048038]	thylakoid membrane [GO:0042651]; oxidoreductase activity, acting on NAD(P)H, quinone or similar compound as acceptor [GO:0016655]; quinone binding [GO:0048038]	9	9	9	46,3	14,078	0	104,82	2660700000	164		0,0210528	0,998403		0,647669906	0,936863955	-0,076939774		0,387574252	0,754490214	-0,058467484		0,458948734	0,718844075	-0,083523178		0,413811754	0,734945455	-0,075747299		0,119129177	0,860441558	-0,040449905	6	6	5	6	5	5	5	5	5
328	P74342	Probable dihydroneopterin aldolase (DHNA) (EC 4.1.2.25) (7,8-dihydroneopterin aldolase)	folB slr1626	1	folic acid biosynthetic process [GO:0046656]; tetrahydrofolate biosynthetic process [GO:0046654]		7,8-dihydromonapterin aldolase activity [GO:0102083]; dihydroneopterin aldolase activity [GO:0004150]	7,8-dihydromonapterin aldolase activity [GO:0102083]; dihydroneopterin aldolase activity [GO:0004150]; folic acid biosynthetic process [GO:0046656]; tetrahydrofolate biosynthetic process [GO:0046654]	4	4	4	50	13,146	0	83,834	723740000	118		0,325744	0,465962		0,11247009	0,959778855	0,122987366		0,418488401	0,510084367	0,292169189		0,541258474	0,444855263	0,41516037		0,077810447	0,901377483	-0,07604332		0,266955532	0,591602781	-0,261245728	4	5	3	2	4	3	4	3	3
329	P74348	Sll1534 protein	sll1534	1			transferase activity, transferring glycosyl groups [GO:0016757]	transferase activity, transferring glycosyl groups [GO:0016757]	5	5	5	14,6	42,884	0	9,2641	200680000	39		1,47939	0,202231		0,587058949	1	0,400368118		0,216854648	0,699894839	0,191225052		0,081799159	0,911018613	-0,095606613		0,035021945	0,953510903	0,042726135		1,206171047	0,057890909	-0,985340881	1	3	1	0	0	3	3	2	0
330	P74349	Twitching mobility protein	pilT	1	transport [GO:0006810]		ATP binding [GO:0005524]	ATP binding [GO:0005524]; transport [GO:0006810]	18	18	18	47	47,898	0	323,31	5403800000	253		0,237751	0,827872		0,541037443	0,932476346	0,114241028		0,150350677	0,836287648	0,0545784		0,718161223	0,615060465	0,100911331		0,108352208	0,915445447	0,030715561		0,3709783	0,597188549	-0,127149963	6	10	5	6	9	10	10	7	8
331	P74357	Sll1530 protein	sll1530	1		tRNA (m1A) methyltransferase complex [GO:0031515]	tRNA (adenine-N1-)-methyltransferase activity [GO:0016429]	tRNA (m1A) methyltransferase complex [GO:0031515]; tRNA (adenine-N1-)-methyltransferase activity [GO:0016429]	9	9	9	28	43,745	0	133,85	1814200000	116		0,0321415	0,995431		0,187023446	0,961522788	-0,02969017		0,301387402	0,775540807	-0,055299759		0,193115078	0,857382847	-0,053219223		0,328234303	0,807544351	-0,05383873		0,167286231	0,872954839	0,026531982	3	3	5	5	5	1	2	3	3
332	P74358	Sll1528 protein	sll1528	1			transferase activity, transferring glycosyl groups [GO:0016757]	transferase activity, transferring glycosyl groups [GO:0016757]	28	28	28	33,6	114,6	0	268,87	2988700000	317		0,0955588	0,990476		0,341300445	0,951965293	0,054535294		0,613612895	0,674936	0,070788193		0,08463535	0,945654618	-0,022855377		0,098769944	0,938889246	0,020235825		0,626915058	0,635854069	0,067889404	7	11	6	5	10	11	13	11	10
333	P74379	Slr0443 protein	slr0443	1					4	4	4	30,4	14,608	0	26,044	361200000	38		0,254938	0,492718		0,153081197	0,944543264	0,208586121		0,993160738	0,190071429	0,736896133		0,572541791	0,409057554	0,516438675		0,248400555	0,669293103	0,298056793		0,506025336	0,337842986	0,498411942	1	2	0	0	1	1	1	1	1
334	P74384	Adenylosuccinate lyase (ASL) (EC 4.3.2.2) (Adenylosuccinase) (ASase)	purB sll0421	1	'de novo' AMP biosynthetic process [GO:0044208]; 'de novo' IMP biosynthetic process [GO:0006189]		(S)-2-(5-amino-1-(5-phospho-D-ribosyl)imidazole-4-carboxamido)succinate AMP-lyase (fumarate-forming) activity [GO:0070626]; N6-(1,2-dicarboxyethyl)AMP AMP-lyase (fumarate-forming) activity [GO:0004018]	(S)-2-(5-amino-1-(5-phospho-D-ribosyl)imidazole-4-carboxamido)succinate AMP-lyase (fumarate-forming) activity [GO:0070626]; N6-(1,2-dicarboxyethyl)AMP AMP-lyase (fumarate-forming) activity [GO:0004018]; 'de novo' AMP biosynthetic process [GO:0044208]; 'de novo' IMP biosynthetic process [GO:0006189]	25	25	25	57,5	48,42	0	323,31	9286700000	430		0,451505	0,876729		0,02093855	0,993053111	0,005502319		0,569282247	0,5959117	0,109811783		0,480085302	0,722864198	0,078332138		0,623546305	0,563887942	0,132290649		1,266538795	0,306668449	0,161857986	10	15	15	14	14	9	14	12	14
335	P74388	2-methyl-6-phytyl-1,4-hydroquinone methyltransferase (EC 2.1.1.295) (2-methyl-6-phytylbenzoquinone/2-methyl-6-solanyl-1,4-benzoquinone methyltransferase) (MPBQ/MSBQ methyltransferase)	sll0418	1	vitamin E biosynthetic process [GO:0010189]		2-methyl-6-geranylgeranyl-1,4-benzoquinol methyltransferase activity [GO:0102550]; 2-methyl-6-phytyl-1,4-benzoquinone methyltransferase activity [GO:0051741]	2-methyl-6-geranylgeranyl-1,4-benzoquinol methyltransferase activity [GO:0102550]; 2-methyl-6-phytyl-1,4-benzoquinone methyltransferase activity [GO:0051741]; vitamin E biosynthetic process [GO:0010189]	3	3	3	11,3	34,947	0	20,836	364270000	62		0,535309	0,642062		0,890014166	1	-0,300530243		0,472613814	0,563409611	-0,154711533		0,080544644	0,946083467	-0,02352066		0,453533957	0,655607415	-0,108298874		0,958087125	0,248743777	-0,254782867	1	2	3	2	2	2	2	2	2
336	P74390	Negative aliphatic amidase regulator	amiC	1	amino acid transport [GO:0006865]	outer membrane-bounded periplasmic space [GO:0030288]		outer membrane-bounded periplasmic space [GO:0030288]; amino acid transport [GO:0006865]	28	28	28	69,5	48,359	0	323,31	72953000000	1030		0,751232	0,31456		0,258139881	0,926781699	-0,164488983		0,127018018	0,826221071	-0,095045853		0,364942182	0,690318036	-0,119883728		0,090936014	0,905577558	-0,046457672		1,257396938	0,061367521	-0,766347122	25	35	34	32	35	30	34	43	38
337	P74394	Sll0272 protein	sll0272	1					6	6	6	73,9	17,658	0	61,541	2255100000	101		0,219249	0,738622		0,314411687	0,931759563	0,134120941		0,934566405	0,324879852	0,264175034		0,622663883	0,492194404	0,216048431		0,789909713	0,386385586	0,272758865		0,695785026	0,294857916	0,312633133	1	4	3	2	4	4	4	3	2
338	P74395	Transcription antitermination protein NusB (Antitermination factor NusB)	nusB sll0271	1	DNA-templated transcription, termination [GO:0006353]; transcription antitermination [GO:0031564]		RNA binding [GO:0003723]	RNA binding [GO:0003723]; DNA-templated transcription, termination [GO:0006353]; transcription antitermination [GO:0031564]	17	17	17	71,5	24,74	0	316,22	4379600000	284		0,107344	0,972568		0,47689709	0,934213001	0,089767838		0,675395738	0,540951708	0,124783707		0,340066402	0,811428041	0,054454041		0,039954711	0,974925784	0,009004211		0,054042017	0,936463546	0,017074203	6	9	10	7	8	8	8	8	8
339	P74396	Slr0280 protein	slr0280	1					13	13	13	30,7	65,405	0	323,31	2632400000	114		1,61366	0,354845		0,669903997	1	-0,279114914		1,507551519	0,152994475	-0,474643707		1,32942861	0,292197802	-0,432115555		1,219746278	0,254821818	-0,38740654		1,252436676	0,108168067	-0,412101746	4	4	5	5	4	1	4	4	4
340	P74400	Sll0267 protein	sll0267	1		integral component of membrane [GO:0016021]; intracellular [GO:0005622]	phosphorelay sensor kinase activity [GO:0000155]	integral component of membrane [GO:0016021]; intracellular [GO:0005622]; phosphorelay sensor kinase activity [GO:0000155]	3	3	3	2,2	178,55	0	4,0121	178880000	13		0,507886	0,294314		0,745949012	1	0,617246246		0,429569781	0,449769863	-0,533740997		0,179792657	0,765002915	-0,24030304		0,416830802	0,478341326	-0,557536697		0,040308548	0,924187982	0,048532486	1	0	1	0	0	0	2	1	1
341	P74409	UPF0053 protein sll0260	sll0260	1		integral component of membrane [GO:0016021]; plasma membrane [GO:0005886]	flavin adenine dinucleotide binding [GO:0050660]; oxidoreductase activity, acting on CH-OH group of donors [GO:0016614]	integral component of membrane [GO:0016021]; plasma membrane [GO:0005886]; flavin adenine dinucleotide binding [GO:0050660]; oxidoreductase activity, acting on CH-OH group of donors [GO:0016614]	3	3	3	8	49,227	0	31,883	234950000	50		0,195878	0,863297		0,493444154	0,936144975	0,125281143		0,850555486	0,383544615	0,209758377		0,570760095	0,560075949	0,155671692		0,885868227	0,409102521	0,2083992		0,866811225	0,322395806	0,203779984	1	2	1	2	3	2	2	1	1
342	P74421	Phosphoglycerate kinase (EC 2.7.2.3)	pgk slr0394	1	glycolytic process [GO:0006096]	cytoplasm [GO:0005737]	ATP binding [GO:0005524]; phosphoglycerate kinase activity [GO:0004618]	cytoplasm [GO:0005737]; ATP binding [GO:0005524]; phosphoglycerate kinase activity [GO:0004618]; glycolytic process [GO:0006096]	35	35	35	79,8	41,783	0	323,31	109820000000	1040		0,335218	0,721917		0,160563753	0,959504065	0,081497192		0,74496517	0,374837061	0,264058685		0,692128919	0,439732888	0,261538696		0,533312314	0,501755158	0,233066559		0,656390638	0,374258065	0,222261047	22	34	29	22	35	29	37	37	27
343	P74423	Alanine--tRNA ligase (EC 6.1.1.7) (Alanyl-tRNA synthetase) (AlaRS)	alaS sll0362	1	alanyl-tRNA aminoacylation [GO:0006419]; tRNA modification [GO:0006400]	cytoplasm [GO:0005737]	alanine-tRNA ligase activity [GO:0004813]; amino acid binding [GO:0016597]; ATP binding [GO:0005524]; metal ion binding [GO:0046872]; tRNA binding [GO:0000049]	cytoplasm [GO:0005737]; alanine-tRNA ligase activity [GO:0004813]; amino acid binding [GO:0016597]; ATP binding [GO:0005524]; metal ion binding [GO:0046872]; tRNA binding [GO:0000049]; alanyl-tRNA aminoacylation [GO:0006419]; tRNA modification [GO:0006400]	34	34	34	42,6	96,14	0	323,31	7613000000	480		0,0216896	0,999786		0,306051544	0,93859301	-0,070116425		0,219109832	0,834944681	-0,040693283		0,204228957	0,874090592	-0,042322922		0,116045724	0,939052209	-0,018478394		0,010340559	0,988545589	-0,002438354	16	21	12	15	12	21	15	12	13
344	P74426	Sll0359 protein	sll0359	1		protein-DNA complex [GO:0032993]	sequence-specific DNA binding [GO:0043565]	protein-DNA complex [GO:0032993]; sequence-specific DNA binding [GO:0043565]	15	15	15	63,2	17,218	0	323,31	49941000000	384		0,669133	0,546823		0,407069203	0,94315683	-0,163145447		0,983427945	0,30138856	-0,280492401		1,188799902	0,329517647	-0,301166153		0,594170944	0,501630854	-0,199411392		0,076574665	0,893050119	0,041419601	13	13	12	14	12	11	11	13	15
345	P74428	Slr0398 protein	slr0398	1					5	5	5	46	18,079	0	78,817	762700000	64		0,737769	0,249143		0,33218099	0,963809129	0,589756012		0,946062556	0,174274194	1,173562241		0,938834651	0,2905	1,159365463		0,859839123	0,244769231	1,098085403		0,450251937	0,351862595	0,73819313	3	2	1	2	2	3	2	1	1
346	P74429	Ycf39 gene product	ycf39	1					22	22	22	64,1	36,519	0	323,31	5978300000	316		1,16944	0,36295		0,947558384	1	-0,344052124		1,377855991	0,159307359	-0,466992569		0,833634865	0,350214797	-0,402824402		1,686608203	0,225170732	-0,53897438		1,069093211	0,137198502	-0,415558624	8	14	6	10	10	9	13	11	9
347	P74443	Slr0144 protein	slr0144	1					4	4	4	24	29,599	0	31,444	156090000	37		1,00101	0,219409		0,186286206	0,938527027	0,143389893		0,210463617	0,717169703	-0,162705612		0,347900223	0,555608247	-0,495052719		0,964977174	0,223351351	-0,967169189	+	1,937232325	0,019591837	-1,168338013	0	2	3	3	0	0	2	3	3
348	P74452	Sll0149 protein	sll0149	1					7	7	7	13,7	65,813	0	107,24	758040000	154		0,16626	0,919015		0,566999573	0,961840777	-0,141699982		0,507575808	0,633868339	-0,096521378		0,448695902	0,671696703	-0,110429764		0,108583815	0,941020734	0,017321777		0,059974422	0,938039816	-0,014398956	4	6	3	5	4	4	4	4	3
349	P74453	Sll0148 protein	sll0148	1					8	8	8	17,6	78,5	0	97,873	415310000	65		0,114349	0,718624		0,172409241	0,938509626	-0,191138077		0,023142351	0,971616146	0,016286087		0,044952203	0,95914806	0,034277725		0,614047584	0,442541033	-0,268912125		0,676877931	0,299336927	-0,319958878	3	4	4	3	1	1	3	3	1
350	P74456	Ribosome-recycling factor (RRF) (Ribosome-releasing factor)	frr sll0145	1	cytoplasmic translational termination [GO:0002184]	cytoplasm [GO:0005737]; cytosol [GO:0005829]	ribosomal large subunit binding [GO:0043023]	cytoplasm [GO:0005737]; cytosol [GO:0005829]; ribosomal large subunit binding [GO:0043023]; cytoplasmic translational termination [GO:0002184]	13	13	13	73,6	20,186	0	323,31	6626200000	241		0,494038	0,647268		0,196242542	0,955205156	-0,086277008		0,476017526	0,528430622	-0,192039871		0,572881944	0,530509589	-0,192128372		1,109065346	0,302976253	-0,308794022		1,172176548	0,16652669	-0,309171677	7	8	8	9	9	9	7	7	9
351	P74459	Chaperone protein ClpB 1	clpB1 slr0156	1	protein processing [GO:0016485]; response to heat [GO:0009408]	cytoplasm [GO:0005737]	ATP binding [GO:0005524]	cytoplasm [GO:0005737]; ATP binding [GO:0005524]; protein processing [GO:0016485]; response to heat [GO:0009408]	32	27	27	40,1	101,39	0	277,82	4181200000	333		0,318865	0,793938		0,253486913	0,954660963	0,063131714		0,758080491	0,509727607	0,131436539		0,280357153	0,754197628	0,100401688		0,625091709	0,522350785	0,163674545		1,494935789	0,143154412	0,266315842	9	11	5	8	7	11	11	7	9
352	P74461	Cation or drug efflux system protein	sll0142	1	transport [GO:0006810]	integral component of membrane [GO:0016021]	transporter activity [GO:0005215]	integral component of membrane [GO:0016021]; transporter activity [GO:0005215]; transport [GO:0006810]	5	5	5	7,6	115,19	0,0080767	1,4874	507560000	15		0,364256	0,293597		0,135550825	0,946515284	-0,45464859		0,241766885	0,614910657	-0,68977356		0,023684916	0,973037152	0,079248428		0,314088773	0,547027708	-0,950517654		0,34854353	0,432643519	0,988672256	0	0	0	0	2	0	0	0	0
353	P74463	Twitching motility protein	pilT	1	transport [GO:0006810]		ATP binding [GO:0005524]	ATP binding [GO:0005524]; transport [GO:0006810]	22	22	22	68	40,615	0	323,31	11594000000	464		0,0266545	0,999485		0,062445455	0,991363489	-0,015427017		0,111643564	0,913213592	0,025411606		0,109574058	0,931205255	-0,028169632		0,042797924	0,965710769	0,012480545		0,246424935	0,780629948	-0,051760101	11	14	15	15	14	9	17	16	11
354	P74465	Pilin biogenesis protein	pilC	1	protein secretion [GO:0009306]	integral component of membrane [GO:0016021]; plasma membrane [GO:0005886]		integral component of membrane [GO:0016021]; plasma membrane [GO:0005886]; protein secretion [GO:0009306]	7	7	7	31,5	32,578	0	85,721	2753400000	97		0,325414	0,704603		0,130308124	0,96172296	0,065075684		0,17101469	0,799183099	0,078654099		0,187906905	0,812844444	0,0971138		0,061622734	0,939579791	-0,03371048		0,556949516	0,418025913	-0,219248199	2	6	2	2	1	4	7	2	1
355	P74478	Slr1926 protein	slr1926	1					8	8	8	30,5	24,631	0	204,79	2469800000	148		0,150434	0,853993		0,07691071	0,964167521	-0,047660065		0,54844201	0,478084211	-0,22362709		0,344532916	0,658742729	-0,168193054		0,452507377	0,559807407	-0,198890305		0,219225113	0,701928444	-0,11134758	5	4	5	4	6	4	6	6	4
356	P74479	Slr1927 protein	slr1927	1		integral component of membrane [GO:0016021]		integral component of membrane [GO:0016021]	5	5	5	14	45,798	0	15,903	240990000	34		0,08873	0,736081		0,027014579	0,989273302	-0,040386963		0,174271949	0,763444853	0,136094284		0,477743954	0,525176471	0,275876999		0,687521038	0,372246269	0,381014252		0,218019565	0,668561983	0,165088272	0	0	0	1	0	0	2	2	0
357	P74483	Slr1931 protein	slr1931	1		integral component of membrane [GO:0016021]		integral component of membrane [GO:0016021]	7	7	7	39,3	31,954	0	82,342	1119300000	79		0,112547	0,901802		0,029403667	0,988900312	-0,014960861		0,063258775	0,936794913	-0,027047729		0,345087954	0,66986108	-0,15387001		0,197981912	0,810493506	0,082060623		0,078046181	0,894389857	-0,03704071	3	3	2	1	1	3	2	2	3
358	P74494	Nucleoside diphosphate kinase (NDK) (NDP kinase) (EC 2.7.4.6) (Nucleoside-2-P kinase)	ndk ndkR sll1852	1	CTP biosynthetic process [GO:0006241]; GTP biosynthetic process [GO:0006183]; UTP biosynthetic process [GO:0006228]	cytoplasm [GO:0005737]; intracellular [GO:0005622]	ATP binding [GO:0005524]; metal ion binding [GO:0046872]; nucleoside diphosphate kinase activity [GO:0004550]	cytoplasm [GO:0005737]; intracellular [GO:0005622]; ATP binding [GO:0005524]; metal ion binding [GO:0046872]; nucleoside diphosphate kinase activity [GO:0004550]; CTP biosynthetic process [GO:0006241]; GTP biosynthetic process [GO:0006183]; UTP biosynthetic process [GO:0006228]	8	8	8	50,3	16,692	0	169,44	12501000000	224		0,548819	0,53928		0,349368789	0,934160116	-0,138990402		0,211172085	0,768942466	0,086887741		0,194913508	0,847150977	0,057818604		0,15306174	0,862714662	0,058179474		1,125254795	0,158585278	0,337783432	6	9	6	6	9	7	8	8	5
359	P74499	Slr1939 protein	slr1939	1		integral component of membrane [GO:0016021]	metalloendopeptidase activity [GO:0004222]	integral component of membrane [GO:0016021]; metalloendopeptidase activity [GO:0004222]	7	7	7	10,3	75,782	0	9,1245	527100000	30		0,375599	0,590921		0,118651456	0,954629318	0,071114349		0,272961356	0,682971202	-0,138895798		0,577944438	0,517186876	-0,211624908		0,228941438	0,76629572	-0,108810806		1,006633171	0,178416523	-0,354551697	1	3	0	0	1	0	0	1	0
360	P74512	Cation-transporting ATPase E1-E2 ATPase	slr1950	1	copper ion import [GO:0015677]	integral component of membrane [GO:0016021]; plasma membrane [GO:0005886]	ATP binding [GO:0005524]; cation-transporting ATPase activity [GO:0019829]; metal ion binding [GO:0046872]	integral component of membrane [GO:0016021]; plasma membrane [GO:0005886]; ATP binding [GO:0005524]; cation-transporting ATPase activity [GO:0019829]; metal ion binding [GO:0046872]; copper ion import [GO:0015677]	4	4	4	9,7	82,571	0	17,01	113820000	36		1,55284	0,214759		0,62685543	1	0,597942352		0,566888111	0,377830721	0,44232254		0,170647888	0,786281398	-0,179833603		0,789227369	0,302185676	0,600426483	+	1,755986415	0,024734177	1,002467728	0	1	0	0	0	1	0	0	0
361	P74514	Probable transcriptional regulatory protein slr0989	slr0989	1	regulation of transcription, DNA-templated [GO:0006355]; transcription, DNA-templated [GO:0006351]	cytosol [GO:0005829]	DNA binding [GO:0003677]	cytosol [GO:0005829]; DNA binding [GO:0003677]; regulation of transcription, DNA-templated [GO:0006355]; transcription, DNA-templated [GO:0006351]	2	2	2	7,9	27,62	0	22,114	652170000	38		0,45248	0,619649		0,497729456	1	-0,236621094		0,902609443	0,288735537	-0,343759155		0,978886473	0,337322314	-0,364307785		0,811319975	0,3696826	-0,293280792		0,662978845	0,313437252	-0,302809143	2	1	1	2	2	1	0	1	2
362	P74515	Glutamate--cysteine ligase (EC 6.3.2.2)	slr0990	1	cellular modified amino acid biosynthetic process [GO:0042398]		ATP binding [GO:0005524]; glutamate-cysteine ligase activity [GO:0004357]	ATP binding [GO:0005524]; glutamate-cysteine ligase activity [GO:0004357]; cellular modified amino acid biosynthetic process [GO:0042398]	9	9	9	27,2	44,072	0	72,12	1853000000	138		0,00083912	1		0,039109369	0,990379229	-0,013579178		0,036554431	0,968918836	-0,011249161		0,075810222	0,9514048	-0,02208519		0,130651429	0,887902275	-0,042167282		0,136408042	0,851040783	-0,039771652	4	4	4	3	3	3	5	5	4
363	P74516	Putative tRNA (cytidine(34)-2'-O)-methyltransferase (EC 2.1.1.207) (tRNA (cytidine/uridine-2'-O-)-methyltransferase)	slr0992	1	tRNA processing [GO:0008033]	cytoplasm [GO:0005737]	RNA binding [GO:0003723]; RNA methyltransferase activity [GO:0008173]	cytoplasm [GO:0005737]; RNA binding [GO:0003723]; RNA methyltransferase activity [GO:0008173]; tRNA processing [GO:0008033]	3	3	3	37,9	17,033	0	38,594	195620000	35		0,0926578	0,830639		0,047472529	0,9905625	-0,034801865		0,414503708	0,544061033	0,217335129		0,353604209	0,648108844	0,17509346		0,183306233	0,808048644	0,099247742		0,043116253	0,933140661	-0,026629257	0	2	1	0	2	0	2	2	0
364	P74521	Glycogen synthase 1 (EC 2.4.1.21) (Starch [bacterial glycogen] synthase 1)	glgA1 glgA sll0945	1	glycogen biosynthetic process [GO:0005978]		alpha-1,4-glucan synthase activity [GO:0033201]; glycogen (starch) synthase activity [GO:0004373]; starch synthase activity [GO:0009011]; transferase activity, transferring glycosyl groups [GO:0016757]	alpha-1,4-glucan synthase activity [GO:0033201]; glycogen (starch) synthase activity [GO:0004373]; starch synthase activity [GO:0009011]; transferase activity, transferring glycosyl groups [GO:0016757]; glycogen biosynthetic process [GO:0005978]	20	20	20	48,2	54,346	0	281,57	5894400000	252		0,00243612	1		0,067969928	0,989817315	-0,01097908		0,201201923	0,882254307	0,025746536		0,045442168	0,97205896	0,013505173		0,10536532	0,943620717	-0,016931152		0,090132898	0,910326019	-0,021894073	5	12	7	4	6	6	11	9	4
365	P74527	Aminopeptidase	ape2	1			aminopeptidase activity [GO:0004177]; metallopeptidase activity [GO:0008237]; zinc ion binding [GO:0008270]	aminopeptidase activity [GO:0004177]; metallopeptidase activity [GO:0008237]; zinc ion binding [GO:0008270]	26	26	26	29,1	97,979	0	323,31	4896600000	395		0,00292573	1		0,104791582	0,962735552	0,040440369		0,000849163	0,998591882	-0,000281143		0,009660836	0,997718141	-0,003647232		0,065184758	0,945182745	0,019084549		0,151529099	0,825742475	0,052019882	11	16	11	11	12	17	15	13	12
366	P74533	Recombination protein RecR	recR slr1426	1	DNA recombination [GO:0006310]; DNA repair [GO:0006281]		DNA binding [GO:0003677]; metal ion binding [GO:0046872]	DNA binding [GO:0003677]; metal ion binding [GO:0046872]; DNA recombination [GO:0006310]; DNA repair [GO:0006281]	4	4	4	18,5	25,504	0	12,079	414080000	39		0,410261	0,419091		0,492412243	1	0,610859299		0,551817352	0,356181818	0,660208893		0,578233467	0,390544031	0,685978699		0,409153761	0,493282913	0,522433472		0,415852028	0,40462425	0,527064514	1	1	0	1	1	2	0	2	0
367	P74536	Slr1428 protein	slr1428	1		integral component of membrane [GO:0016021]	GTP binding [GO:0005525]	integral component of membrane [GO:0016021]; GTP binding [GO:0005525]	7	7	7	21,4	71,612	0	40,524	415100000	56		0,772465	0,754746		0,291306724	0,940941176	-0,068312836		0,269974843	0,781262222	0,056253815		0,355052611	0,76321394	0,072264862		0,567141812	0,632834081	0,102632141		0,528341765	0,563286154	-0,109952545	2	2	3	1	1	2	2	1	1
368	P74540	Slr1431 protein	slr1431	1					9	9	9	25,1	52,88	0	55,033	551950000	84		0,412568	0,739966		0,310968459	0,94145098	0,091016769		0,307426801	0,73943128	0,076687241		0,042313662	0,972190769	-0,01148262		0,0375609	0,964967643	0,01548233		1,008595513	0,238929746	0,253505707	2	1	1	2	2	0	4	2	3
369	P74541	OmpR subfamily	sll1330	1	phosphorelay signal transduction system [GO:0000160]; regulation of transcription, DNA-templated [GO:0006355]; transcription, DNA-templated [GO:0006351]	intracellular [GO:0005622]	DNA binding [GO:0003677]	intracellular [GO:0005622]; DNA binding [GO:0003677]; phosphorelay signal transduction system [GO:0000160]; regulation of transcription, DNA-templated [GO:0006355]; transcription, DNA-templated [GO:0006351]	3	3	3	16	28,301	0	17,503	701740000	28		0,18921	0,444867		0,112353381	0,959458371	0,06032753		0,183691892	0,762301016	-0,124282455		1,17441917	0,33971134	0,271888351		0,370176981	0,51153867	-0,665753555		0,363110098	0,432009281	-0,718514633	1	1	0	0	1	1	1	1	0
370	P74542	Monophosphatase	sll1329	1	phosphatidylinositol phosphorylation [GO:0046854]			phosphatidylinositol phosphorylation [GO:0046854]	3	3	3	17,1	31,555	0	79,223	333320000	17		0,619386	0,245122		0,672121409	1	-1,109698105		0,023896998	0,967326154	-0,04104538		0,552955694	0,440013289	0,409917831		0,367099526	0,564205128	0,297567368		0,377370924	0,419709261	-0,68786087	0	0	1	0	2	0	1	1	1
371	P74552	Helicase of the snf2/rad54 family	sll1366	1			ATP binding [GO:0005524]; helicase activity [GO:0004386]	ATP binding [GO:0005524]; helicase activity [GO:0004386]	12	12	12	14,3	115,83	0	20,508	547730000	106		0,0181148	0,988018		0,046730348	0,992786297	-0,026789093		0,423245553	0,64781893	-0,103487396		0,294548469	0,763816943	-0,08637085		0,072136743	0,942278922	-0,021307373		0,38136224	0,614560154	-0,107155228	3	4	3	2	6	4	5	2	2
372	P74561	1-(5-phosphoribosyl)-5-[(5-phosphoribosylamino)methylideneamino] imidazole-4-carboxamide isomerase (EC 5.3.1.16) (Phosphoribosylformimino-5-aminoimidazole carboxamide ribotide isomerase)	hisA slr0652	1	histidine biosynthetic process [GO:0000105]; tryptophan biosynthetic process [GO:0000162]	cytoplasm [GO:0005737]	1-(5-phosphoribosyl)-5-[(5-phosphoribosylamino)methylideneamino]imidazole-4-carboxamide isomerase activity [GO:0003949]	cytoplasm [GO:0005737]; 1-(5-phosphoribosyl)-5-[(5-phosphoribosylamino)methylideneamino]imidazole-4-carboxamide isomerase activity [GO:0003949]; histidine biosynthetic process [GO:0000105]; tryptophan biosynthetic process [GO:0000162]	12	12	12	56,6	27,35	0	155,9	2130900000	198		0,681438	0,712726		0,644051728	1	-0,166781616		0,242717647	0,822330736	-0,044163513		0,142179945	0,909974769	-0,034237289		0,206846087	0,838275986	0,055770493		0,49777359	0,559653251	0,118507767	2	10	5	4	8	2	6	6	4
373	P74571	Oligopeptidase A	prlC	1	signal peptide processing [GO:0006465]	cytosol [GO:0005829]	metal ion binding [GO:0046872]; metalloendopeptidase activity [GO:0004222]	cytosol [GO:0005829]; metal ion binding [GO:0046872]; metalloendopeptidase activity [GO:0004222]; signal peptide processing [GO:0006465]	32	32	32	48,2	80,296	0	323,31	7122600000	447		0,164813	0,984985		0,015866159	0,995740573	-0,004119873		0,497020435	0,64391727	0,093175888		0,418318703	0,74116129	0,077218628		0,217833311	0,838567857	0,052272415		0,351281354	0,689122744	0,072049713	8	19	10	11	11	10	15	14	11
374	P74572	Pyrroline-5-carboxylate reductase (P5C reductase) (P5CR) (EC 1.5.1.2) (PCA reductase)	proC slr0661	1	L-proline biosynthetic process [GO:0055129]	cytoplasm [GO:0005737]	pyrroline-5-carboxylate reductase activity [GO:0004735]	cytoplasm [GO:0005737]; pyrroline-5-carboxylate reductase activity [GO:0004735]; L-proline biosynthetic process [GO:0055129]	6	6	6	33,3	27,883	0	56,826	1903700000	116		0,130688	0,875925		0,141161077	0,96126499	0,067251205		0,335536245	0,66054065	0,122423172		0,270608505	0,761892683	0,09661026		0,146258979	0,867127273	-0,054290771		0,163035286	0,780175408	-0,082176208	2	6	3	2	5	2	4	6	1
375	P74576	Biosynthetic arginine decarboxylase 1 (ADC 1) (EC 4.1.1.19)	speA1 speA slr0662	1	arginine catabolic process [GO:0006527]; spermidine biosynthetic process [GO:0008295]		arginine decarboxylase activity [GO:0008792]; metal ion binding [GO:0046872]	arginine decarboxylase activity [GO:0008792]; metal ion binding [GO:0046872]; arginine catabolic process [GO:0006527]; spermidine biosynthetic process [GO:0008295]	16	16	16	29,2	78,238	0	209,85	1496000000	167		0,301997	0,713162		0,380152583	0,953076649	0,206860352		0,682266939	0,382920732	0,275468063		0,478162156	0,555454311	0,204413605		0,793816045	0,393813051	0,258478165		1,038768168	0,177910035	0,340570068	2	5	1	2	3	5	7	7	2
376	P74582	Aconitate hydratase B (ACN) (Aconitase) (EC 4.2.1.3) ((2R,3S)-2-methylisocitrate dehydratase) ((2S,3R)-3-hydroxybutane-1,2,3-tricarboxylate dehydratase) (2-methyl-cis-aconitate hydratase) (EC 4.2.1.99) (Iron-responsive protein-like) (IRP-like) (RNA-binding protein)	acnB slr0665	1	propionate catabolic process, 2-methylcitrate cycle [GO:0019629]; tricarboxylic acid cycle [GO:0006099]	cytosol [GO:0005829]	2-methylisocitrate dehydratase activity [GO:0047456]; 4 iron, 4 sulfur cluster binding [GO:0051539]; aconitate hydratase activity [GO:0003994]; metal ion binding [GO:0046872]; mRNA 3'-UTR binding [GO:0003730]; mRNA binding [GO:0003729]	cytosol [GO:0005829]; 2-methylisocitrate dehydratase activity [GO:0047456]; 4 iron, 4 sulfur cluster binding [GO:0051539]; aconitate hydratase activity [GO:0003994]; metal ion binding [GO:0046872]; mRNA 3'-UTR binding [GO:0003730]; mRNA binding [GO:0003729]; propionate catabolic process, 2-methylcitrate cycle [GO:0019629]; tricarboxylic acid cycle [GO:0006099]	42	42	42	62,2	93,551	0	323,31	22859000000	772		0,194724	0,965623		0,549051078	0,933223089	0,103519821		0,512995153	0,615083871	0,107152557		0,620043692	0,655007856	0,09466362		0,28458599	0,828429872	0,049212265		0,024804647	0,972581222	0,00512085	17	23	26	22	27	23	26	27	21
377	P74583	Slr0666 protein	slr0666	1					4	4	4	17,8	32,245	0	7,2073	82671000	30		0,118232	0,6903		0,030326108	0,991518341	0,03880043		0,021295611	0,970706331	0,024658585		0,255763513	0,685317495	0,26484108		0,632576554	0,376552486	0,449139404		0,250652487	0,617212583	0,207915497	0	1	1	0	0	0	2	2	0
378	P74588	Slr1557 protein	slr1557	1					14	14	14	48	40,235	0	228,73	2486300000	197		0,723305	0,54315		0,504283061	0,955665505	-0,131952286		0,881046524	0,380198758	-0,206206131		0,990898636	0,338899183	-0,353060913		0,589232909	0,530835897	-0,165233231		0,065833532	0,911928125	0,028913879	6	6	5	7	6	6	5	5	7
379	P74591	Shikimate dehydrogenase (NADP(+)) (SDH) (EC 1.1.1.25)	aroE slr1559	1	aromatic amino acid family biosynthetic process [GO:0009073]; chorismate biosynthetic process [GO:0009423]; shikimate metabolic process [GO:0019632]	cytosol [GO:0005829]	NADP binding [GO:0050661]; shikimate 3-dehydrogenase (NADP+) activity [GO:0004764]	cytosol [GO:0005829]; NADP binding [GO:0050661]; shikimate 3-dehydrogenase (NADP+) activity [GO:0004764]; aromatic amino acid family biosynthetic process [GO:0009073]; chorismate biosynthetic process [GO:0009423]; shikimate metabolic process [GO:0019632]	6	6	6	31,4	31,099	0	100,18	628790000	83		0,0666854	0,957616		0,108527107	0,966509735	0,0415905		0,486885395	0,547626604	0,164564133		0,073671331	0,941112369	0,031595993		0,255148763	0,742281188	0,11295166		0,29465301	0,670265811	0,096289444	2	3	1	3	3	1	3	3	2
380	P74592	ATP phosphoribosyltransferase regulatory subunit	hisZ hisS2 slr1560	1	histidine biosynthetic process [GO:0000105]	cytoplasm [GO:0005737]		cytoplasm [GO:0005737]; histidine biosynthetic process [GO:0000105]	9	9	9	24,4	44,282	0	111,98	2678300000	108		0,8509	0,712512		0,389268527	0,929708108	-0,101211929		1,144704891	0,490194373	0,113785553		0,425632741	0,714052576	0,091871262		0,741160942	0,579834515	0,107906723		0,983729327	0,384424168	0,147171783	3	5	3	2	2	3	5	3	1
381	P74606	Polyphenol oxidase (EC 1.10.3.-) (Multicopper oxidase slr1573)	slr1573	1			copper ion binding [GO:0005507]; oxidoreductase activity [GO:0016491]	copper ion binding [GO:0005507]; oxidoreductase activity [GO:0016491]	3	3	3	23,9	29,345	0	7,7549	188960000	34		0,33732	0,401338		0,012012152	0,993545247	-0,022054291		0,405043164	0,475878468	0,501021576		0,513852767	0,433721088	0,580649567		0,077673678	0,892265323	0,131169891		0,614321947	0,245423929	0,676475525	0	1	1	1	2	1	1	0	0
382	P74607	UPF0296 protein ssl2874	ssl2874	1					8	8	8	85,4	9,8693	0	259,79	4987200000	157		0,368473	0,566264		0,028871597	0,989736677	-0,019867325		0,963096018	0,317378788	0,266111755		1,336202274	0,290960352	0,374755478		0,041667873	0,955425019	0,022649384		0,344998338	0,565291242	0,17958374	4	5	4	2	3	3	3	5	2
383	P74614	NADH dehydrogenase	ndh	1	aerobic electron transport chain [GO:0019646]	integral component of membrane [GO:0016021]	NAD(P)H dehydrogenase (quinone) activity [GO:0003955]	integral component of membrane [GO:0016021]; NAD(P)H dehydrogenase (quinone) activity [GO:0003955]; aerobic electron transport chain [GO:0019646]	8	8	8	20,8	56,862	0	57,166	613250000	83		0,15029	0,827642		0,26318113	0,942614806	-0,123523712		0,693906835	0,378078493	-0,284524918		0,500422075	0,534790323	-0,223682404		0,366154865	0,624434389	-0,173046494		0,304548614	0,614365385	-0,143356323	1	2	3	4	2	2	3	4	1
384	P74617	Sll1481 protein	sll1481	1		integral component of membrane [GO:0016021]		integral component of membrane [GO:0016021]	15	15	15	47	48,59	0	111,86	1584100000	170		1,18633	0,334724		0,66042749	1	-0,300511169		1,15402482	0,199344262	-0,457148361		1,218608484	0,29048951	-0,603178787		1,124504215	0,24103937	-0,49453125		0,646290022	0,310327563	-0,326386261	7	7	7	6	4	5	5	4	4
385	P74630	Sll0735 protein	sll0735	1	carbohydrate metabolic process [GO:0005975]	extracellular region [GO:0005576]	catalytic activity [GO:0003824]	extracellular region [GO:0005576]; catalytic activity [GO:0003824]; carbohydrate metabolic process [GO:0005975]	20	20	20	45	62,075	0	140,93	6682500000	312		0,473206	0,618039		0,097070777	0,966178322	0,042254639		0,540509836	0,600693566	-0,110385895		0,326188369	0,755767258	-0,084112167		0,271873986	0,747030422	-0,097623444		1,287980068	0,128246628	-0,33887291	6	13	6	12	10	6	12	16	6
386	P74638	Acetyl-coenzyme A carboxylase carboxyl transferase subunit alpha (ACCase subunit alpha) (Acetyl-CoA carboxylase carboxyltransferase subunit alpha) (EC 6.4.1.2)	accA sll0728	1	fatty acid biosynthetic process [GO:0006633]; malonyl-CoA biosynthetic process [GO:2001295]	acetyl-CoA carboxylase complex [GO:0009317]	acetyl-CoA carboxylase activity [GO:0003989]; ATP binding [GO:0005524]	acetyl-CoA carboxylase complex [GO:0009317]; acetyl-CoA carboxylase activity [GO:0003989]; ATP binding [GO:0005524]; fatty acid biosynthetic process [GO:0006633]; malonyl-CoA biosynthetic process [GO:2001295]	10	10	10	37,7	36,042	0	323,31	1924400000	155		0,210525	0,924242		0,260373266	0,936835414	0,084539795		0,215236256	0,7977163	0,060069275		0,070649992	0,953772112	0,021472549		0,036123068	0,974433716	0,010409927		0,421794359	0,614103647	-0,097087479	5	4	4	4	4	5	6	4	5
387	P74640	Slr0755 protein	slr0755	1					4	4	4	29,7	21,543	0	33,033	235080000	48		0,182335	0,514556		0,14435483	0,950644951	-0,232418442		0,773816208	0,271946548	0,558342743		0,067548042	0,92245719	0,107116699		0,376544266	0,532680307	0,39359169		0,307011699	0,544703158	0,312436295	0	2	0	0	2	2	2	1	0
388	P74645	Circadian clock protein KaiB	kaiB slr0757	1	circadian rhythm [GO:0007623]		identical protein binding [GO:0042802]	identical protein binding [GO:0042802]; circadian rhythm [GO:0007623]	8	8	8	83,8	11,935	0	111,54	990770000	85		0,10454	0,862719		0,002074971	0,998779259	0,001325607		0,130396064	0,854512093	-0,050144958		0,221830057	0,81327493	-0,078439331		0,40463252	0,611363844	-0,161394882		0,2295976	0,689734417	0,117010498	3	3	2	0	2	3	4	2	1
389	P74654	N-acyl-L-amino acid amidohydrolase	ama	1	metabolic process [GO:0008152]		hydrolase activity [GO:0016787]	hydrolase activity [GO:0016787]; metabolic process [GO:0008152]	4	4	4	19,2	45,439	0	85,087	121250000	43		0,0779534	0,705538		0,17818061	0,933372229	0,23674736		0,196843412	0,70997107	0,226703262		0,146257723	0,813648574	0,179641724		0,231585456	0,684879075	-0,294821167		0,016631797	0,966003003	0,026478195	1	1	0	0	1	0	2	1	0
390	P74660	Slr1659 protein	slr1659	1					5	5	5	37,2	13,307	0	17,178	2136200000	44		0,132017	0,86225		0,405232101	0,954434783	-0,191156006		0,631966064	0,445549101	-0,219343185		0,611423925	0,473294299	-0,253406906		0,459573204	0,56247362	-0,189883041		0,47383218	0,486862832	-0,188248825	1	2	1	1	1	2	3	0	0
391	P74668	Pleiotropic regulatory protein	degT	1			catalytic activity [GO:0003824]	catalytic activity [GO:0003824]	17	17	17	75,3	41,596	0	323,31	5210600000	412		0,824681	0,915911		0,292765365	0,959438878	0,042587662		0,738111261	0,582139955	0,09983902		1,194847376	0,493833577	0,126449585		1,06649759	0,460135493	0,143558121		0,838419575	0,511548807	0,103516388	9	13	10	11	12	11	12	16	10
392	P74675	Sll1542 protein	sll1542	1					7	7	7	32,7	34,814	0	18,998	361390000	45		0,230162	0,556527		0,560549629	1	-0,626867294		1,021807725	0,280801706	-0,303131485		0,584388543	0,485695522	-0,247803116		0,439258824	0,569147659	-0,188719559		0,697775349	0,357213654	-0,223228455	2	1	0	0	1	1	3	1	0
393	P74681	Sll0447 protein	sll0447	1		integral component of membrane [GO:0016021]		integral component of membrane [GO:0016021]	4	4	4	27,6	31,156	0	12,957	283310000	63		0,431463	0,393791		0,287425854	0,938790083	0,368180847		0,83637816	0,248946341	0,576401901		1,162774795	0,299647059	0,688386536		1,212913057	0,212309677	0,717839432		0,954987953	0,12580117	0,591442108	1	0	0	1	1	1	1	4	1
394	P74682	Sll0446 protein	sll0446	1					36	36	36	45,7	120,98	0	323,31	2343100000	387		0,0366548	0,923088		0,202817159	0,931543779	0,142141724		0,131754579	0,834241645	-0,074942398		0,195204803	0,786773585	-0,122197723		0,01279501	0,986846386	-0,010407639		0,022505633	0,964986466	0,012678146	16	8	13	6	7	4	25	17	9
395	P74683	Sll0445 protein	sll0445	1			GTPase activity [GO:0003924]	GTPase activity [GO:0003924]	8	8	8	28,5	54,394	0	81,052	410410000	82		0,00548142	0,986912		0,037134808	0,991138462	0,040229797		0,151705996	0,778358608	-0,136470413		0,126374419	0,861463845	-0,098262024		0,014976748	0,981253776	0,01677742		0,019500466	0,964510894	0,017622375	5	0	3	2	1	0	5	4	1
396	P74685	Sll0443 protein	sll0443	1					13	13	13	46,5	51,061	0	84,821	984700000	120		0,362456	0,544941		0,092383851	0,961861635	-0,071468353		0,06575797	0,914759065	-0,049142075		0,006364582	0,998762332	0,00369072		0,510520191	0,522041558	0,208108902		0,857649097	0,2095296	0,376670456	4	1	1	2	2	1	2	4	1
397	P74686	Antiviral protein	ski2	1	RNA secondary structure unwinding [GO:0010501]	cytoplasm [GO:0005737]	ATP binding [GO:0005524]; ATP-dependent RNA helicase activity [GO:0004004]; nucleic acid binding [GO:0003676]	cytoplasm [GO:0005737]; ATP binding [GO:0005524]; ATP-dependent RNA helicase activity [GO:0004004]; nucleic acid binding [GO:0003676]; RNA secondary structure unwinding [GO:0010501]	10	10	10	12,8	113,38	0	66,181	462670000	79		0,195245	0,891309		0,414206467	0,934252366	-0,137765503		0,036504378	0,96688701	0,01356163		0,107916724	0,913642917	-0,042961121		0,315498563	0,743302463	-0,085269165		0,594391573	0,45596347	-0,1671772	2	2	2	2	2	4	3	1	2
398	P74693	Cation or drug efflux system protein	slr0454	1	transport [GO:0006810]	integral component of membrane [GO:0016021]	transporter activity [GO:0005215]	integral component of membrane [GO:0016021]; transporter activity [GO:0005215]; transport [GO:0006810]	6	6	6	11,1	97,673	0	9,541	231890000	35		0,169104	0,831068		0,036955553	0,990539432	-0,015664673		0,344413516	0,629857598	0,154389954		0,390960126	0,636526919	0,159835815		0,371162645	0,657887446	0,130595398		0,089565605	0,887591707	-0,035928345	0	0	0	0	0	0	2	0	0
399	P74705	Slr1178 protein	slr1178	1		integral component of membrane [GO:0016021]		integral component of membrane [GO:0016021]	3	3	3	32,3	16,61	0	60,055	600850000	49		0,402796	0,344341		0,465861413	1	-0,73441124		0,319637388	0,601074561	-0,232813644		0,768172432	0,330833333	-0,750206757		0,061890797	0,92814923	-0,055017471		0,048614519	0,917557797	0,040989685	0	0	1	1	3	1	2	2	1
400	P74707	Peptide chain release factor 1 (RF-1)	prfA sll1110	1		cytoplasm [GO:0005737]	translation release factor activity, codon specific [GO:0016149]	cytoplasm [GO:0005737]; translation release factor activity, codon specific [GO:0016149]	17	17	17	54,5	41,126	0	323,31	3311500000	202		0,0931323	0,923636		0,523974438	0,937248869	0,099670029		0,144518387	0,866591362	0,03880806		0,214960862	0,778880611	-0,11401062		0,03747371	0,975074809	0,008882141		0,272449983	0,758111304	0,056146622	6	6	5	4	5	6	8	7	3
401	P74709	5'-nucleotidase SurE (EC 3.1.3.5) (Nucleoside 5'-monophosphate phosphohydrolase)	surE sll1108	1		cytoplasm [GO:0005737]	5'-nucleotidase activity [GO:0008253]; metal ion binding [GO:0046872]; nucleotide binding [GO:0000166]	cytoplasm [GO:0005737]; 5'-nucleotidase activity [GO:0008253]; metal ion binding [GO:0046872]; nucleotide binding [GO:0000166]	8	8	8	36,4	30,464	0	57,799	571690000	73		0,241535	0,5465		0,02851614	0,99027027	-0,045523453		0,41552315	0,488261538	0,371647263		0,505206024	0,45933439	0,438235474		0,418496501	0,512219839	0,363739014		0,366661273	0,487384275	0,327795029	2	1	1	3	2	1	1	4	4
402	P74715	Slr1186 protein	slr1186	1		integral component of membrane [GO:0016021]		integral component of membrane [GO:0016021]	2	2	2	21,6	16,498	0	7,3617	280360000	24		0,380685	0,312434		0,317747324	0,963142857	0,58167572		0,849347914	0,194847458	1,324664307		0,767056455	0,310610526	1,211204529		0,172191539	0,74434252	0,380088806		0,341214543	0,455740614	0,716321564	0	2	0	0	0	2	0	0	0
403	P74720	Sll1106 protein	sll1106	1		integral component of membrane [GO:0016021]		integral component of membrane [GO:0016021]	10	10	10	56,7	18,031	0	323,31	13916000000	367		0,0658139	0,894952		0,089295061	0,96396482	0,054710388		0,009297969	0,98863833	-0,005094147		0,372072695	0,648317821	0,161146927		0,270045188	0,735370333	-0,115686798		0,080983189	0,876414458	0,05549202	8	11	12	10	10	12	12	15	10
404	P74722	Slr0586 protein	slr0586	1	dephosphorylation [GO:0016311]; DNA repair [GO:0006281]	cytosol [GO:0005829]	phosphoglycolate phosphatase activity [GO:0008967]	cytosol [GO:0005829]; phosphoglycolate phosphatase activity [GO:0008967]; dephosphorylation [GO:0016311]; DNA repair [GO:0006281]	9	9	9	51,8	29,636	0	29,561	458890000	43		0,391829	0,401722		0,129321385	0,954964055	0,053955078		0,292066444	0,690994083	0,116481018		0,351244819	0,550259067	-0,50511322		0,34539757	0,678053362	0,127762604		0,789554064	0,253121168	0,326833725	2	0	1	0	0	0	1	1	1
405	P74725	Sll0577 protein	sll0577	1					3	3	3	36,1	17,839	0	57,166	649180000	61		0,338181	0,510952		0,113979807	0,961603636	0,054021835		0,893106532	0,292194726	0,338678741		0,951602202	0,380271186	0,264149475		0,212120889	0,729664293	-0,216662979		0,063131597	0,898974036	-0,045927811	0	2	2	2	1	1	2	1	1
406	P74729	HrEpiB	sll0576	1			catalytic activity [GO:0003824]; coenzyme binding [GO:0050662]	catalytic activity [GO:0003824]; coenzyme binding [GO:0050662]	26	26	26	72,1	34,951	0	323,31	23494000000	539		0,153094	0,913962		0,185161909	0,956639175	0,073150253		0,430700801	0,568406393	0,170976257		0,598321447	0,529368276	0,184434128		0,224514021	0,798003774	0,08115654		0,208577509	0,750656168	0,077826691	12	21	18	14	14	16	17	14	16
407	P74731	Transport permease protein	rfbA	1	transport [GO:0006810]	ATP-binding cassette (ABC) transporter complex [GO:0043190]		ATP-binding cassette (ABC) transporter complex [GO:0043190]; transport [GO:0006810]	4	4	4	12,5	30,304	0	28,766	253400000	69		0,56806	0,249091		0,334278296	0,9582	0,382408524		0,815177516	0,218674419	1,011205292		1,607689222	0,4868	1,363100433		0,132402364	0,8231809	0,189289856		0,000766914	0,997548673	0,001714706	0	3	0	1	2	1	3	2	0
408	P74734	Sll0572 protein	sll0572	1					9	9	9	27	52,016	0	18,491	314870000	77		1,02993	0,209924		0,185685894	0,933477218	-0,256644821		1,090243027	0,152907216	-0,997267532		0,719176395	0,339674541	-0,738623428		0,883437975	0,229422594	-1,255856705	+	1,400782651	0,032309091	-1,416362	6	4	5	2	0	4	7	4	2
409	P74746	Slr0600 protein	slr0600	1			oxidoreductase activity [GO:0016491]	oxidoreductase activity [GO:0016491]	10	10	10	29,4	35,993	0	124,11	2825800000	161		0,468278	0,723612		0,23720281	0,937947548	-0,096523666		0,650223147	0,468016086	-0,189653778		0,712651785	0,44824918	-0,238378906		0,965148209	0,351305085	-0,269962311		0,674340969	0,379905941	-0,209529495	6	5	5	5	5	6	6	6	4
410	P74747	Slr0601 protein	slr0601	1		integral component of membrane [GO:0016021]		integral component of membrane [GO:0016021]	5	5	5	21,1	13,48	0	210,61	1019000000	33		0,0400636	0,702529		0,148672573	0,939498305	0,453936386		0,014849654	0,977495072	0,048020935		0,346697985	0,539527559	0,654058075		0,455740709	0,429974522	0,868605423		0,075573223	0,850328163	0,205562592	0	1	0	1	2	1	1	1	0
411	P74752	Slr0605 protein	slr0605	1		cytoplasm [GO:0005737]	glutathione transferase activity [GO:0004364]	cytoplasm [GO:0005737]; glutathione transferase activity [GO:0004364]	5	5	5	13,5	36,538	0	38,595	746730000	95		1,0509	0,320352		0,862735799	1	-0,419743347		1,511809264	0,141152542	-0,627598572		0,869535896	0,32815047	-0,550226212		1,252848675	0,216549451	-0,568245697		1,38615495	0,065422969	-0,572419357	2	4	1	3	3	3	4	4	2
412	P74753	Slr0606 protein	slr0606	1	lipopolysaccharide core region biosynthetic process [GO:0009244]	cytosol [GO:0005829]	ADP-heptose-lipopolysaccharide heptosyltransferase activity [GO:0008713]	cytosol [GO:0005829]; ADP-heptose-lipopolysaccharide heptosyltransferase activity [GO:0008713]; lipopolysaccharide core region biosynthetic process [GO:0009244]	14	14	14	40,1	34,766	0	148,18	3369900000	191		0,294403	0,79515		0,331385655	0,929515306	-0,100860596		0,130220085	0,854136667	-0,050071716		0,164330835	0,851423009	0,067456818		0,531802584	0,550800995	-0,166293716		0,508198868	0,50092779	-0,159417343	3	8	2	3	8	4	7	9	3
413	P74755	Histidine biosynthesis bifunctional protein HisIE [Includes: Phosphoribosyl-AMP cyclohydrolase (PRA-CH) (EC 3.5.4.19); Phosphoribosyl-ATP pyrophosphatase (PRA-PH) (EC 3.6.1.31)]	hisI hisIE slr0608	1	histidine biosynthetic process [GO:0000105]	cytoplasm [GO:0005737]	ATP binding [GO:0005524]; phosphoribosyl-AMP cyclohydrolase activity [GO:0004635]; phosphoribosyl-ATP diphosphatase activity [GO:0004636]	cytoplasm [GO:0005737]; ATP binding [GO:0005524]; phosphoribosyl-AMP cyclohydrolase activity [GO:0004635]; phosphoribosyl-ATP diphosphatase activity [GO:0004636]; histidine biosynthetic process [GO:0000105]	5	5	5	30,7	23,945	0	15,884	159180000	24		0,107478	0,690098		0,101188071	0,958971751	0,117457199		0,175464999	0,742744802	0,208666229		0,001836818	1	0,002689362		0,250816819	0,682224576	0,234182739		0,587320245	0,291539528	0,493770218	0	2	0	0	0	0	2	0	0
414	P74771	NAD(P)H-quinone oxidoreductase subunit O (EC 1.6.5.-) (NAD(P)H dehydrogenase I subunit O) (NDH-1 subunit O) (NDH-O)	ndhO ssl1690	1		plasma membrane [GO:0005886]; thylakoid membrane [GO:0042651]	oxidoreductase activity, acting on NAD(P)H, quinone or similar compound as acceptor [GO:0016655]; quinone binding [GO:0048038]	plasma membrane [GO:0005886]; thylakoid membrane [GO:0042651]; oxidoreductase activity, acting on NAD(P)H, quinone or similar compound as acceptor [GO:0016655]; quinone binding [GO:0048038]	5	5	5	66,7	8,2885	0	82,493	487030000	47		0,0412635	0,869006		0,18978668	0,948882609	-0,101813126		0,362179739	0,608716289	-0,163533783		0,273423638	0,673729967	-0,250295258		0,220835818	0,774795367	-0,106129456		0,427085554	0,435139884	-0,334988785	2	3	2	2	3	3	1	3	1
415	P74789	Sll0319 protein	sll0319	1		outer membrane-bounded periplasmic space [GO:0030288]		outer membrane-bounded periplasmic space [GO:0030288]	9	9	9	30,6	32,315	0	148,75	2411900000	128		0,117741	0,897892		0,054306993	0,99135144	0,026573944		0,158200999	0,834148845	0,055983353		0,195238223	0,812501382	0,088910294		0,43086517	0,601929907	0,160303116		0,169350235	0,79835234	-0,063095093	3	2	3	4	5	4	3	4	3
416	P74797	Ssr0332 protein	ssr0332	1		integral component of membrane [GO:0016021]		integral component of membrane [GO:0016021]	4	4	4	48,6	8,1773	0	11,97	601340000	70		0,110661	0,813469		0,274947362	0,930303694	-0,17357254		0,560770605	0,451950752	-0,252880478		0,409226609	0,577689106	-0,22120285		0,53604004	0,476353276	-0,271605301		0,113663423	0,846824302	-0,055158615	0	3	2	2	3	1	3	3	2
417	P77964	Protein translocase subunit SecY	secY sll1814	1	protein transport [GO:0015031]	integral component of membrane [GO:0016021]; plasma membrane [GO:0005886]; thylakoid membrane [GO:0042651]		integral component of membrane [GO:0016021]; plasma membrane [GO:0005886]; thylakoid membrane [GO:0042651]; protein transport [GO:0015031]	9	9	9	18,1	47,999	0	167,09	7170100000	115		0,456749	0,795277		0,053049763	0,990806452	0,017756271		0,665999676	0,501204517	0,153339005		1,178857447	0,381270492	0,207986832		0,495606376	0,628071991	0,116424942		0,104698407	0,88515655	0,031369019	3	5	2	2	4	5	2	1	2
418	P77968	Superoxide dismutase [Fe] (EC 1.15.1.1)	sodB slr1516	1			metal ion binding [GO:0046872]; superoxide dismutase activity [GO:0004784]	metal ion binding [GO:0046872]; superoxide dismutase activity [GO:0004784]	10	10	10	83,4	21,677	0	323,31	33726000000	430		0,442037	0,565583		0,207752718	0,938848	0,121907043		0,827089725	0,291928144	0,380863571		0,950605288	0,333412429	0,396338654		0,632865566	0,438957878	0,269079208		0,471741216	0,445598163	0,24597702	10	16	7	10	16	12	12	18	9
419	P77970	Glutamate--ammonia ligase	glnN	1	nitrogen compound metabolic process [GO:0006807]		glutamate-ammonia ligase activity [GO:0004356]	glutamate-ammonia ligase activity [GO:0004356]; nitrogen compound metabolic process [GO:0006807]	30	30	30	49,9	79,209	0	323,31	12032000000	544		0,647842	0,494717		0,590339549	1	0,230656052		1,207658121	0,214157576	0,383926392		0,738213688	0,422423611	0,264478302		1,365809217	0,240380952	0,366184616		0,018146712	0,968697083	0,011326218	13	15	16	13	16	18	14	20	17
420	P77972	Enolase (EC 4.2.1.11) (2-phospho-D-glycerate hydro-lyase) (2-phosphoglycerate dehydratase)	eno slr0752	1	glycolytic process [GO:0006096]	cell surface [GO:0009986]; extracellular region [GO:0005576]; phosphopyruvate hydratase complex [GO:0000015]	magnesium ion binding [GO:0000287]; phosphopyruvate hydratase activity [GO:0004634]	cell surface [GO:0009986]; extracellular region [GO:0005576]; phosphopyruvate hydratase complex [GO:0000015]; magnesium ion binding [GO:0000287]; phosphopyruvate hydratase activity [GO:0004634]; glycolytic process [GO:0006096]	22	22	22	56,9	46,528	0	323,31	42545000000	578		0,0659184	0,989043		0,095259726	0,968630324	0,030931473		0,429039903	0,668141271	0,090996552		0,530553535	0,671793179	0,096867371		0,143609834	0,882771064	0,043113708		0,494804279	0,609699903	0,089110565	14	18	18	19	17	14	18	18	23
421	Q46363	Acetazolamide conferring resistance protein zam	zam sll1910	1			exonuclease activity [GO:0004527]; nucleic acid binding [GO:0003676]	exonuclease activity [GO:0004527]; nucleic acid binding [GO:0003676]	22	22	22	33,9	87,541	0	323,31	7184900000	326		0,36527	0,826896		0,358792071	0,925118509	-0,106789398		0,398894957	0,661021363	0,101302719		0,407783209	0,6905	0,106676865		0,125164451	0,907319638	0,029940033		0,319269133	0,690043243	0,077037811	7	11	7	9	10	8	11	8	8
422	Q55081	Deoxyribodipyrimidine photo-lyase (EC 4.1.99.3) (DNA photolyase) (Photoreactivating enzyme)	phrA phr slr0854	1	DNA repair [GO:0006281]; protein-chromophore linkage [GO:0018298]		deoxyribodipyrimidine photo-lyase activity [GO:0003904]; DNA binding [GO:0003677]; nucleotide binding [GO:0000166]	deoxyribodipyrimidine photo-lyase activity [GO:0003904]; DNA binding [GO:0003677]; nucleotide binding [GO:0000166]; DNA repair [GO:0006281]; protein-chromophore linkage [GO:0018298]	9	9	9	21,5	56,025	0	7,7784	565930000	40		1,15728	0,237857		1,062696476	1	-0,382595444		0,297844156	0,645639547	-0,16713295		1,176309627	0,292606557	-0,429240417		1,138890083	0,210738462	-1,081489563		0,839045241	0,225559322	-0,350704956	2	3	1	1	1	2	2	1	0
423	Q55087	Geranylgeranyl diphosphate reductase (EC 1.3.1.83) (Geranylgeranyl reductase)	chlP sll1091	1	chlorophyll biosynthetic process [GO:0015995]; photosynthesis [GO:0015979]		FAD binding [GO:0071949]; geranylgeranyl diphosphate reductase activity [GO:0102067]; geranylgeranyl reductase activity [GO:0045550]	FAD binding [GO:0071949]; geranylgeranyl diphosphate reductase activity [GO:0102067]; geranylgeranyl reductase activity [GO:0045550]; chlorophyll biosynthetic process [GO:0015995]; photosynthesis [GO:0015979]	34	34	34	71	44,882	0	323,31	54859000000	676		0,793001	0,530695		0,628606061	0,996398104	0,167289352		0,678376661	0,439489481	0,208029556		0,936545523	0,378769231	0,272870636		1,511905629	0,271974359	0,269755173		0,144121125	0,815524853	-0,064138031	19	19	17	19	22	20	20	19	20
424	Q55128	Aspartate aminotransferase (AspAT) (EC 2.6.1.1) (Transaminase A)	aspC sll0402	1	biosynthetic process [GO:0009058]	cytoplasm [GO:0005737]	L-aspartate:2-oxoglutarate aminotransferase activity [GO:0004069]; L-phenylalanine:2-oxoglutarate aminotransferase activity [GO:0080130]; pyridoxal phosphate binding [GO:0030170]	cytoplasm [GO:0005737]; L-aspartate:2-oxoglutarate aminotransferase activity [GO:0004069]; L-phenylalanine:2-oxoglutarate aminotransferase activity [GO:0080130]; pyridoxal phosphate binding [GO:0030170]; biosynthetic process [GO:0009058]	18	18	18	56,8	42,352	0	323,31	4806900000	372		0,844815	0,854645		0,03193837	0,990619632	-0,007037735		1,051184333	0,442664804	-0,141853333		0,875483932	0,53805277	-0,124050522		0,917579748	0,490089888	-0,141361618		0,812612784	0,499399123	-0,109906769	9	11	10	10	11	10	14	13	10
425	Q55135	Formyltetrahydrofolate deformylase (EC 3.5.1.10) (Formyl-FH(4) hydrolase)	purU sll0070	1	'de novo' IMP biosynthetic process [GO:0006189]; one-carbon metabolic process [GO:0006730]		formyltetrahydrofolate deformylase activity [GO:0008864]; hydroxymethyl-, formyl- and related transferase activity [GO:0016742]	formyltetrahydrofolate deformylase activity [GO:0008864]; hydroxymethyl-, formyl- and related transferase activity [GO:0016742]; 'de novo' IMP biosynthetic process [GO:0006189]; one-carbon metabolic process [GO:0006730]	7	7	7	31,3	32,634	0	29,629	184080000	37		0,745275	0,300673		0,174194131	0,936197248	0,21295929		1,093891249	0,174827309	0,674971771		1,351551843	0,3156	0,838311005		0,315696791	0,60793526	0,289617157		0,307432897	0,557103306	0,261066055	0	3	0	1	0	1	3	1	0
426	Q55138	Sll0068 protein	sll0068	1			lipid transporter activity [GO:0005319]	lipid transporter activity [GO:0005319]	17	17	17	16,2	137,82	0	41,096	426270000	61		0,343522	0,663474		0,138781587	0,956510304	0,082454681		0,146217295	0,82786195	-0,069663239		0,310527766	0,675699674	-0,173177338		0,674262426	0,422	-0,272105026		0,004506868	0,991252033	-0,002787781	2	4	2	1	1	2	6	2	1
427	Q55141	Acetolactate synthase small subunit (EC 2.2.1.6) (Acetohydroxy-acid synthase small subunit) (AHAS) (ALS)	ilvH ilvN sll0065	1	isoleucine biosynthetic process [GO:0009097]; valine biosynthetic process [GO:0009099]	acetolactate synthase complex [GO:0005948]; cytosol [GO:0005829]	acetolactate synthase activity [GO:0003984]	acetolactate synthase complex [GO:0005948]; cytosol [GO:0005829]; acetolactate synthase activity [GO:0003984]; isoleucine biosynthetic process [GO:0009097]; valine biosynthetic process [GO:0009099]	12	12	12	73,3	18,871	0	323,31	7618900000	237		0,0295219	0,989661		0,07502837	0,989300083	0,021826553		0,142605049	0,840394604	0,054990005		0,290389975	0,783076046	0,074303436		0,133503911	0,900979933	0,034644318		0,1400592	0,847754501	-0,040762711	6	7	3	4	6	10	6	8	6
428	Q55154	Chaperone protein dnaK1 (HSP70-1) (Heat shock 70 kDa protein 1) (Heat shock protein 70-1)	dnaK1 sll0058	1	protein folding [GO:0006457]		ATP binding [GO:0005524]; unfolded protein binding [GO:0051082]	ATP binding [GO:0005524]; unfolded protein binding [GO:0051082]; protein folding [GO:0006457]	29	29	29	43,2	75,178	0	323,31	12031000000	440		0,800369	0,544037		0,150708226	0,957394059	-0,075553513		0,816347135	0,355335593	-0,263533401		1,206231151	0,310391608	-0,349449539		0,841355699	0,36647767	-0,285442734		0,915370744	0,246985251	-0,272763062	15	18	13	14	11	15	19	16	11
429	Q55155	General secretion pathway protein E	gspE	1	transport [GO:0006810]		ATP binding [GO:0005524]	ATP binding [GO:0005524]; transport [GO:0006810]	32	32	32	60	75,111	0	323,31	7897100000	523		1,19169	0,334197		0,440376685	0,96693617	-0,240139771		1,156005279	0,18831769	-0,510569763		1,241139454	0,300136986	-0,5575634		1,002432274	0,269506667	-0,483843994		0,876093416	0,199789819	-0,389165115	18	21	18	18	14	13	20	17	17
430	Q55159	Processing protease	sll0055	1			metal ion binding [GO:0046872]; metalloendopeptidase activity [GO:0004222]	metal ion binding [GO:0046872]; metalloendopeptidase activity [GO:0004222]	8	8	8	20,3	48,117	0	22,908	315240000	70		0,637633	0,259603		0,285128845	0,945202037	0,436935043		0,867517741	0,2070125	0,923642731		0,987518498	0,28973913	1,040806198		0,635429026	0,329723077	0,828240585		1,03004835	0,073266332	1,137938309	0	1	0	0	2	1	2	0	0
431	Q55160	Biotin carboxylase	accC	1			ATP binding [GO:0005524]; biotin carboxylase activity [GO:0004075]; metal ion binding [GO:0046872]	ATP binding [GO:0005524]; biotin carboxylase activity [GO:0004075]; metal ion binding [GO:0046872]	12	12	12	43,5	49,164	0	200,67	2766700000	249		0,0780454	0,977301		0,269049128	0,93871156	0,077566147		0,184297798	0,823871972	0,054436111		0,237376419	0,785236295	0,089673996		0,108511902	0,904945455	-0,037241745		0,038666152	0,951382979	0,013742065	3	10	6	5	7	5	10	12	8
432	Q55163	Methionyl-tRNA formyltransferase (EC 2.1.2.9)	fmt slr0070	1			methionyl-tRNA formyltransferase activity [GO:0004479]	methionyl-tRNA formyltransferase activity [GO:0004479]	4	4	4	21,2	35,941	0	39,756	297230000	75		0,165839	0,72937		0,144793593	0,956041365	0,12184906		0,431189302	0,497855879	0,302872086		0,524152527	0,468342679	0,360254288		0,304991174	0,629146067	0,246570206		0,231906267	0,649477612	0,179283142	1	2	1	1	3	2	4	2	2
433	Q55164	Conserved component of ABC transporter for natural amino acids	natA	1			ATPase activity [GO:0016887]; ATP binding [GO:0005524]	ATP binding [GO:0005524]; ATPase activity [GO:0016887]	5	5	5	24,7	29,062	0	39,407	416620000	58		0,369664	0,600361		0,15058562	0,955355372	-0,109454727		0,397339901	0,548901278	-0,224820709		0,799453537	0,361122172	-0,394832611		0,414842902	0,561648485	-0,220557785		0,024150997	0,961846854	-0,019620895	3	3	1	2	1	2	4	2	3
434	Q55168	Phytochrome-like protein cph1 (EC 2.7.13.3) (Bacteriophytochrome cph1) (Light-regulated histidine kinase 1)	cph1 slr0473	1	detection of visible light [GO:0009584]; protein autophosphorylation [GO:0046777]; protein-chromophore linkage [GO:0018298]; red, far-red light phototransduction [GO:0009585]; regulation of transcription, DNA-templated [GO:0006355]; response to red or far red light [GO:0009639]	intracellular [GO:0005622]	ATP binding [GO:0005524]; identical protein binding [GO:0042802]; phosphorelay sensor kinase activity [GO:0000155]; protein histidine kinase activity [GO:0004673]; red or far-red light photoreceptor activity [GO:0009883]	intracellular [GO:0005622]; ATP binding [GO:0005524]; identical protein binding [GO:0042802]; phosphorelay sensor kinase activity [GO:0000155]; protein histidine kinase activity [GO:0004673]; red or far-red light photoreceptor activity [GO:0009883]; detection of visible light [GO:0009584]; protein autophosphorylation [GO:0046777]; protein-chromophore linkage [GO:0018298]; red, far-red light photo…	5	5	5	10	84,232	0	9,7331	80547000	18		0,0242042	0,934281		0,303095108	0,9340729	0,251420212		0,023208225	0,978443603	0,008560944		0,238830213	0,812343284	0,072812271		0,275283223	0,758993171	0,088952255		0,112137141	0,82558396	0,087672424	0	0	0	0	0	0	0	0	0
435	Q55170	UvrABC system protein B (Protein UvrB) (Excinuclease ABC subunit B)	uvrB sll0459	1	nucleotide-excision repair [GO:0006289]; SOS response [GO:0009432]	cytoplasm [GO:0005737]	ATP binding [GO:0005524]; DNA binding [GO:0003677]; excinuclease ABC activity [GO:0009381]	cytoplasm [GO:0005737]; ATP binding [GO:0005524]; DNA binding [GO:0003677]; excinuclease ABC activity [GO:0009381]; nucleotide-excision repair [GO:0006289]; SOS response [GO:0009432]	14	14	14	28,4	76,848	0	33,194	786870000	46		0,501172	0,315353		0,251771058	0,93832537	-0,088186646		0,234360976	0,762724424	-0,081578445		0,616860252	0,357570776	-1,007025528		0,893421748	0,378781022	-0,240872955		0,499926712	0,513688312	-0,151942062	0	1	2	1	1	1	1	2	1
436	Q55176	Slr0483 protein	slr0483	1		integral component of membrane [GO:0016021]; thylakoid [GO:0009579]		integral component of membrane [GO:0016021]; thylakoid [GO:0009579]	8	8	8	28,9	16,885	0	323,31	13208000000	222		1,08494	0,455366		0,363638938	0,941017241	-0,124320221		0,32999443	0,69715122	-0,09431839		0,081854007	0,937489051	-0,030608749		1,12789666	0,330554545	-0,252474976		1,556379075	0,072393939	-0,419462967	6	8	7	8	7	7	8	8	5
437	Q55200	Protein SphX	sphX sll0679	1	phosphate ion transport [GO:0006817]		phosphate ion binding [GO:0042301]	phosphate ion binding [GO:0042301]; phosphate ion transport [GO:0006817]	15	15	15	53	36,778	0	214,95	1630600000	69		1,26123	0,139		0,286486046	0,952087912	0,724282455		0,154201892	0,739346629	0,573734283		0,541305709	0,381542857	1,326311493		0,640298613	0,311732673	1,336474228	+	2,997185169	0,002	4,41430397	0	0	0	0	0	0	0	0	0
438	Q55361	Sll0887 protein	sll0887	1			metallopeptidase activity [GO:0008237]	metallopeptidase activity [GO:0008237]	20	20	20	57	47,599	0	323,31	3286700000	314		0,220729	0,958451		0,284590175	0,953526652	-0,057241821		0,220439773	0,817925412	-0,048801422		0,371129926	0,748295704	-0,080381012		1,070709383	0,440546012	-0,154199982		0,321920082	0,735911894	-0,058124542	3	14	8	10	11	6	13	14	8
439	Q55362	Sll0886 protein	sll0886	1					2	2	2	16,1	30,962	0	76,548	270380000	43		0,255834	0,363566		0,229641572	0,939194366	0,359805679		0,613518584	0,326776557	0,636392975		0,048043877	0,942850686	0,109479904		0,342300583	0,540152091	-0,553754807		0,220512529	0,607464078	-0,477544022	2	2	0	1	3	3	4	0	1
440	Q55368	Molybdopterin molybdenumtransferase (MPT Mo-transferase) (EC 2.10.1.1)	moeA slr0900	1	molybdenum incorporation into molybdenum-molybdopterin complex [GO:0018315]; molybdopterin cofactor biosynthetic process [GO:0032324]; Mo-molybdopterin cofactor biosynthetic process [GO:0006777]	cytoplasm [GO:0005737]	metal ion binding [GO:0046872]; molybdopterin adenylyltransferase activity [GO:0061598]; molybdopterin molybdotransferase activity [GO:0061599]	cytoplasm [GO:0005737]; metal ion binding [GO:0046872]; molybdopterin adenylyltransferase activity [GO:0061598]; molybdopterin molybdotransferase activity [GO:0061599]; Mo-molybdopterin cofactor biosynthetic process [GO:0006777]; molybdenum incorporation into molybdenum-molybdopterin complex [GO:0018315]; molybdopterin cofactor biosynthetic process [GO:0032324]	5	5	5	16,9	43,393	0	9,2874	319420000	48		0,184047	0,829691		0,492574402	0,991087558	0,221693039		0,740067803	0,510760494	0,134370422		1,03481419	0,437624365	0,174949265		0,663573934	0,481521127	0,19164505		0,101285327	0,890732484	0,029606628	1	1	1	1	1	1	1	2	0
441	Q55374	Slr0907 protein	slr0907	1					34	34	34	42,7	115,38	0	323,31	4406900000	481		0,133852	0,976022		0,263445778	0,939754464	0,077107239		0,163936479	0,854527546	-0,039706039		0,230943661	0,837532374	-0,055664825		0,031996402	0,975582317	0,009566498		0,0070647	0,990213018	0,002077484	12	19	7	9	14	11	20	19	14
442	Q55375	Slr0909 protein	slr0909	1					13	13	13	40	52,495	0	323,31	3725000000	316		0,390182	0,813031		0,004118781	0,998553823	0,001396179		0,234150055	0,798849604	-0,054933167		0,044826529	0,972823621	0,013971329		0,069802617	0,944820189	-0,019656372		0,897380768	0,310974768	-0,206473541	8	12	8	10	10	10	13	11	8
443	Q55385	Probable 30S ribosomal protein PSRP-3 (Ycf65-like protein)	slr0923	1	translation [GO:0006412]	ribosome [GO:0005840]	structural constituent of ribosome [GO:0003735]	ribosome [GO:0005840]; structural constituent of ribosome [GO:0003735]; translation [GO:0006412]	7	7	7	88,4	12,638	0	201,69	2724800000	206		0,760636	0,31142		0,439445537	1	0,40553093		1,109562874	0,157461187	0,80286293		1,030237509	0,289906736	0,713579178		0,64900478	0,357979633	0,5441082		0,891729129	0,131096774	0,667420578	1	6	3	2	8	3	7	9	2
444	Q55386	Slr0924 protein	slr0924	1	protein transport [GO:0015031]	outer membrane-bounded periplasmic space [GO:0030288]		outer membrane-bounded periplasmic space [GO:0030288]; protein transport [GO:0015031]	5	5	5	39,5	31,336	0	65,97	2723200000	141		0,155409	0,934064		0,505325219	0,951769369	0,141272354		0,408320639	0,633668763	0,11746254		0,372191695	0,677317391	0,128907013		0,655592839	0,522339426	0,155709839		0,685024556	0,417929245	0,170811081	3	4	4	4	5	6	3	5	5
445	Q55389	Ferredoxin-thioredoxin reductase, catalytic chain (FTR-C) (EC 1.8.7.2) (Ferredoxin-thioredoxin reductase subunit B) (FTR-B)	ftrC sll0554	1	oxidation-reduction process [GO:0055114]; photosynthesis [GO:0015979]		4 iron, 4 sulfur cluster binding [GO:0051539]; electron transfer activity [GO:0009055]; ferredoxin:thioredoxin reductase activity [GO:0030385]; ferredoxin-thioredoxin reductase activity [GO:0103012]; metal ion binding [GO:0046872]	4 iron, 4 sulfur cluster binding [GO:0051539]; electron transfer activity [GO:0009055]; ferredoxin-thioredoxin reductase activity [GO:0103012]; ferredoxin:thioredoxin reductase activity [GO:0030385]; metal ion binding [GO:0046872]; oxidation-reduction process [GO:0055114]; photosynthesis [GO:0015979]	7	7	7	60,2	13,39	0	104,73	1241700000	118		0,03487	0,962272		0,116306957	0,95904	0,067890549		0,154873791	0,809208007	0,079453278		0,054635599	0,951773344	0,03340416		0,189158856	0,808570356	-0,094932556		0,140356728	0,816279461	0,06591568	2	4	3	3	5	1	5	4	4
446	Q55390	Sll0553 protein	sll0553	1			hydrolase activity [GO:0016787]	hydrolase activity [GO:0016787]	11	11	11	38,3	38,269	0	140,1	1978600000	157		0,800911	0,346494		0,735146167	1	-0,373805237		1,300840692	0,157506726	-0,533431244		0,627091814	0,399621212	-0,454087448		1,463202359	0,212	-0,59536438	+	1,727295413	0,036575875	-0,631440353	4	7	4	6	5	4	6	7	6
447	Q55392	Slr0565 protein	slr0565	1		integral component of membrane [GO:0016021]		integral component of membrane [GO:0016021]	6	6	6	29,5	35,381	0	45,098	1209900000	76		0,0171419	0,988367		0,171355877	0,959373878	0,064470291		0,02804775	0,971237082	-0,010750961		0,131914292	0,868723776	0,075268555		0,079497634	0,930016207	-0,031797791		0,105418236	0,878655974	-0,034689713	3	2	3	2	3	2	1	3	3
448	Q55393	Diflavin flavoprotein A 1 (EC 1.-.-.-) (NADH:oxygen oxidoreductase) (SsATF573)	dfa1 sll0550	1			FMN binding [GO:0010181]; metal ion binding [GO:0046872]; oxidoreductase activity [GO:0016491]	FMN binding [GO:0010181]; metal ion binding [GO:0046872]; oxidoreductase activity [GO:0016491]	24	24	24	49,6	63,505	0	323,31	5881400000	415		0,0125843	0,999163		0,331567035	0,942483516	0,059758759		0,116883469	0,887416393	0,035481262		0,098558608	0,944305712	0,020960236		0,017893048	0,985866266	0,005395889		0,299238407	0,720356261	0,065914154	9	14	9	11	15	11	13	17	10
449	Q55406	Acyl-CoA desaturase 1	desC(des9)	1	unsaturated fatty acid biosynthetic process [GO:0006636]	integral component of membrane [GO:0016021]	oxidoreductase activity [GO:0016491]; oxidoreductase activity, acting on paired donors, with oxidation of a pair of donors resulting in the reduction of molecular oxygen to two molecules of water [GO:0016717]	integral component of membrane [GO:0016021]; oxidoreductase activity [GO:0016491]; oxidoreductase activity, acting on paired donors, with oxidation of a pair of donors resulting in the reduction of molecular oxygen to two molecules of water [GO:0016717]; unsaturated fatty acid biosynthetic process [GO:0006636]	3	3	3	7,2	37,203	0	17,994	554190000	32		0,532299	0,248822		0,011663335	0,994050267	-0,034770584		1,170307016	0,15456	1,631581116		0,509597411	0,40240293	1,041317368		0,476269097	0,409151515	1,008227539		0,43948905	0,352290446	0,86704483	0	1	1	1	1	0	2	1	0
450	Q55413	Slr0825 protein	slr0825	1			serine-type peptidase activity [GO:0008236]	serine-type peptidase activity [GO:0008236]	15	15	15	30	70,175	0	125,19	2423300000	178		0,211396	0,961387		0,199476201	0,959326693	0,054273987		0,17303795	0,849160101	-0,040449905		0,374607622	0,734646403	-0,086959076		0,085067324	0,939084067	-0,022042084		0,329223211	0,71969258	-0,062032318	2	5	3	4	3	4	6	8	2
451	Q55420	dTDP-glucose 4,6-dehydratase (EC 4.2.1.46)	rfbB	1	nucleotide-sugar metabolic process [GO:0009225]		dTDP-glucose 4,6-dehydratase activity [GO:0008460]	dTDP-glucose 4,6-dehydratase activity [GO:0008460]; nucleotide-sugar metabolic process [GO:0009225]	5	5	5	21,3	38,487	0	52,569	403800000	62		0,288561	0,79044		0,049127908	0,992048741	0,022621155		0,022869336	0,977499246	0,007548523		0,14458194	0,902295026	0,041697311		0,936895888	0,39114032	0,217106628		0,489263617	0,492498346	0,174871063	1	2	1	1	2	2	2	2	1
452	Q55422	Phosphoribosylformylglycinamidine cyclo-ligase (EC 6.3.3.1) (AIR synthase) (AIRS) (Phosphoribosyl-aminoimidazole synthetase)	purM slr0838	1	'de novo' IMP biosynthetic process [GO:0006189]	cytoplasm [GO:0005737]	ATP binding [GO:0005524]; phosphoribosylformylglycinamidine cyclo-ligase activity [GO:0004641]	cytoplasm [GO:0005737]; ATP binding [GO:0005524]; phosphoribosylformylglycinamidine cyclo-ligase activity [GO:0004641]; 'de novo' IMP biosynthetic process [GO:0006189]	4	4	4	15,8	36,164	0	73,601	1487800000	72		0,235182	0,77898		0,467471061	0,936705502	-0,127149582		1,080095559	0,34802087	-0,204798508		0,086750781	0,923295681	-0,047829819		1,186167847	0,309804124	-0,27647934		0,465844796	0,538303287	-0,143977356	2	3	2	2	2	2	4	3	1
453	Q55424	Putative amidase (EC 3.5.1.4)	sll0828	1			amidase activity [GO:0004040]	amidase activity [GO:0004040]	9	9	9	31,6	54,254	0	90,905	976750000	158		0,114392	0,988226		0,131113059	0,964248062	-0,027274704		0,066916298	0,946974763	-0,018836975		0,494454487	0,747791583	0,067571259		0,251090064	0,868038029	-0,034898758		0,22165564	0,815599664	-0,041386032	3	7	3	5	6	3	6	6	5
454	Q55426	Slr0841 protein	slr0841	1		outer membrane-bounded periplasmic space [GO:0030288]		outer membrane-bounded periplasmic space [GO:0030288]	9	9	9	52,6	31,566	0	193,68	1049000000	123		0,00615664	0,99003		0,024718536	0,98801248	-0,02580986		0,037218231	0,94792535	-0,036135864		0,137929494	0,831227437	-0,14134903		0,072583396	0,908512315	-0,069613647		0,162565091	0,737559859	-0,147792053	6	3	3	1	3	7	4	5	2
455	Q55429	NAD(P)H-quinone oxidoreductase chain 5 (EC 1.6.5.-) (NAD(P)H dehydrogenase I, chain 5) (NDH-1, chain 5)	ndhF slr0844	1	ATP synthesis coupled electron transport [GO:0042773]	integral component of membrane [GO:0016021]; plasma membrane [GO:0005886]	NADH dehydrogenase (ubiquinone) activity [GO:0008137]; quinone binding [GO:0048038]	integral component of membrane [GO:0016021]; plasma membrane [GO:0005886]; NADH dehydrogenase (ubiquinone) activity [GO:0008137]; quinone binding [GO:0048038]; ATP synthesis coupled electron transport [GO:0042773]	6	6	6	10,4	74,399	0	47,732	481230000	69		0,488097	0,307655		0,145390514	0,952211663	0,2043293		0,967976927	0,183483395	0,866766357		0,898137354	0,295401709	0,892299271		0,198280402	0,7351692	0,260879517		0,009915458	0,97721131	0,017707062	0	4	0	1	3	1	6	2	0
456	Q55437	Sll0048 protein	sll0048	1					12	12	12	48,7	34,866	0	53,598	1006500000	70		0,379549	0,73921		0,58982975	1	-0,191104126		1,052458866	0,291	-0,269283295		0,322428085	0,71793089	-0,118891525		0,948379506	0,366723404	-0,24491806		0,946701131	0,277700428	-0,230533218	2	5	2	2	1	0	5	2	1
457	Q55441	Slr0023 protein	slr0023	1					3	3	3	22,5	23,101	0	10,709	85971000	40		0,51932	0,343358		0,245272753	0,930897681	0,232294464		1,079202655	0,160052632	0,82968483		1,493601728	0,315636364	0,684391022		0,701072601	0,367186047	0,392062759		0,415996982	0,429565621	0,38317337	0	1	1	0	0	0	2	1	1
458	Q55442	Sll0044 protein	sll0044	1	chemotaxis [GO:0006935]		signal transducer activity [GO:0004871]	signal transducer activity [GO:0004871]; chemotaxis [GO:0006935]	6	6	6	43,5	17,733	0	9,124	256440000	57		0,12543	0,730819		0,271051997	0,934146927	0,275183868		0,350780707	0,544060819	0,327589798		0,341565135	0,58515942	0,328607178		0,045579888	0,941252974	0,053725433		0,246944073	0,610454106	0,249289322	1	2	2	1	1	1	2	2	1
459	Q55443	CheA like protein	sll0043	1	chemotaxis [GO:0006935]	cytoplasm [GO:0005737]	phosphorelay sensor kinase activity [GO:0000155]	cytoplasm [GO:0005737]; phosphorelay sensor kinase activity [GO:0000155]; chemotaxis [GO:0006935]	21	20	20	19,5	153,1	0	166,91	1736300000	199		0,302595	0,748968		0,095615468	0,962257778	-0,056613922		0,525456563	0,481684485	-0,232509995		0,471401613	0,539299735	-0,237481689		0,490458406	0,522031496	-0,227310562		0,241967963	0,670113346	-0,12689743	6	6	4	6	5	4	7	4	4
460	Q55445	Putative methyl-accepting chemotaxis protein sll0041	sll0041	1	chemotaxis [GO:0006935]; protein-chromophore linkage [GO:0018298]	integral component of membrane [GO:0016021]	signal transducer activity [GO:0004871]	integral component of membrane [GO:0016021]; signal transducer activity [GO:0004871]; chemotaxis [GO:0006935]; protein-chromophore linkage [GO:0018298]	34	34	34	42,3	108,33	0	323,31	7783300000	424		0,58818	0,650585		0,125802621	0,957219512	-0,064981461		0,72164827	0,383490798	-0,254834366		0,707266211	0,426346484	-0,27409935		0,528606302	0,517731025	-0,210623932		0,122194303	0,83351861	-0,060430527	12	19	13	12	9	10	18	16	14
461	Q55447	CheY subfamily	sll0039	1	phosphorelay signal transduction system [GO:0000160]	intracellular [GO:0005622]		intracellular [GO:0005622]; phosphorelay signal transduction system [GO:0000160]	8	8	8	75,6	13,181	0	95,607	4110200000	150		0,752379	0,643704		0,405699319	0,947005146	-0,169416046		0,779132466	0,362136439	-0,269738388		0,875797433	0,373414317	-0,308024979		0,73652176	0,40452381	-0,266454697		0,507114904	0,465825595	-0,193968964	3	6	5	2	3	4	5	5	3
462	Q55448	PatA subfamily	sll0038	1	phosphorelay signal transduction system [GO:0000160]	intracellular [GO:0005622]		intracellular [GO:0005622]; phosphorelay signal transduction system [GO:0000160]	15	15	15	41,5	44,815	0	253,69	5213600000	310		0,361097	0,756436		0,024894357	0,990506543	0,010794449		0,657976812	0,503739675	-0,153565979		0,741154639	0,492510264	-0,176066208		0,359861081	0,689424084	-0,109870911		1,129292089	0,240650746	-0,225363541	12	12	9	9	7	8	9	11	9
463	Q55449	Slr0031 protein	slr0031	1					3	3	3	7,4	66,968	0,0026288	2,0485	256090000	26		0,224283	0,469416		0,864524447	1	-0,792264557		0,721101974	0,259346939	-0,811098099		1,014201476	0,3274375	-0,397121429		0,41518634	0,536639594	-0,278498077		0,656878284	0,247293078	-0,519014359	1	0	1	1	1	0	0	1	0
464	Q55452	Uncharacterized protein sll0036	sll0036	1	methylglyoxal biosynthetic process [GO:0019242]		methylglyoxal synthase activity [GO:0008929]; NAD+ kinase activity [GO:0003951]	methylglyoxal synthase activity [GO:0008929]; NAD+ kinase activity [GO:0003951]; methylglyoxal biosynthetic process [GO:0019242]	6	6	6	27	45,909	0	30,366	396270000	35		0,0705469	0,923565		0,097660529	0,96453169	-0,046617889		0,129433215	0,8336	-0,07645874		0,144944067	0,863634446	0,069628525		0,17972307	0,807947516	0,104317474		0,178591667	0,753973799	0,095549774	2	3	0	1	1	0	1	0	2
465	Q55455	Sll0033 protein	sll0033	1	carotenoid biosynthetic process [GO:0016117]	intracellular [GO:0005622]	carotenoid isomerase activity [GO:0046608]; oxidoreductase activity [GO:0016491]	intracellular [GO:0005622]; carotenoid isomerase activity [GO:0046608]; oxidoreductase activity [GO:0016491]; carotenoid biosynthetic process [GO:0016117]	14	14	14	38,5	55,771	0	134,4	1730800000	208		0,67848	0,727747		0,170089348	0,95502947	0,060971069		0,944638101	0,354079174	0,226595688		0,908775379	0,403389706	0,229354858		0,583402765	0,549082707	0,15296669		0,299761762	0,67210929	0,091578293	6	9	5	6	7	6	7	8	5
466	Q55457	Slr0038 protein	slr0038	1					6	6	6	61,4	15,24	0	148,56	1527200000	165		0,261011	0,685666		0,014866303	0,993109932	0,008021927		0,010422349	0,987321375	0,006370163		0,036429497	0,972410895	0,019674301		0,280566087	0,720557377	-0,124259186		0,693270153	0,294308322	-0,31844635	6	6	5	6	5	5	7	6	5
467	Q55458	Uncharacterized protein slr0039	slr0039	1					11	11	11	50,4	38,418	0	163,13	3735300000	278		0,424032	0,705382		0,387002789	0,932311927	-0,139332581		0,608511791	0,476015831	-0,195970917		0,467168492	0,562626263	-0,198703003		0,624535731	0,453424739	-0,245103836		1,262229742	0,138370093	-0,325698471	8	10	9	7	11	10	8	10	8
468	Q55467	Magnesium-protoporphyrin O-methyltransferase (EC 2.1.1.11) (Magnesium-protoporphyrin IX methyltransferase)	chlM slr0525	1	light-independent chlorophyll biosynthetic process [GO:0036068]; photosynthesis [GO:0015979]		magnesium protoporphyrin IX methyltransferase activity [GO:0046406]	magnesium protoporphyrin IX methyltransferase activity [GO:0046406]; light-independent chlorophyll biosynthetic process [GO:0036068]; photosynthesis [GO:0015979]	14	14	14	47,4	25,08	0	158,34	4677800000	138		0,0242767	0,994746		0,236084149	0,9516013	-0,072590637		0,024108834	0,978730303	-0,008390808		0,029065729	0,979237223	0,009935379		0,088602417	0,928275974	0,029141617		0,087279361	0,902200942	-0,025475311	4	3	2	4	5	5	5	3	4
469	Q55478	Ap-4-A phosphorylase II	sll0509	1	nucleotide metabolic process [GO:0009117]		ATP adenylyltransferase activity [GO:0003877]; ATP binding [GO:0005524]	ATP adenylyltransferase activity [GO:0003877]; ATP binding [GO:0005524]; nucleotide metabolic process [GO:0009117]	2	2	2	8,9	33,898	0,0026247	2,0258	179750000	30		0,0824547	0,821788		0,491174806	1	0,254324722		0,200216677	0,743328302	0,13604126		0,316299352	0,668434109	0,183696747		0,044504188	0,944110759	-0,048751831		0,353363433	0,559954639	0,183543396	1	1	1	1	1	1	1	0	1
470	Q55482	Isoprenyl transferase (EC 2.5.1.-)	uppS sll0506	1	polyprenol biosynthetic process [GO:0016094]	cytosol [GO:0005829]	metal ion binding [GO:0046872]; polyprenyltransferase activity [GO:0002094]	cytosol [GO:0005829]; metal ion binding [GO:0046872]; polyprenyltransferase activity [GO:0002094]; polyprenol biosynthetic process [GO:0016094]	6	6	6	28,9	28,823	0	16,17	470470000	51		0,418616	0,332042		0,562232677	0,967139241	-0,164073944		0,478867045	0,393706505	-0,705756378		1,032887439	0,303007519	-1,042699814		0,434285246	0,563226277	-0,203219986		0,893794354	0,229941807	-0,31012001	2	2	1	2	3	2	3	1	1
471	Q55483	Diadenylate cyclase (DAC) (EC 2.7.7.85) (Cyclic-di-AMP synthase) (c-di-AMP synthase)	dacA sll0505	1	second-messenger-mediated signaling [GO:0019932]	integral component of membrane [GO:0016021]; intracellular [GO:0005622]; plasma membrane [GO:0005886]	adenylate cyclase activity [GO:0004016]; ATP binding [GO:0005524]; nucleotidyltransferase activity [GO:0016779]	integral component of membrane [GO:0016021]; intracellular [GO:0005622]; plasma membrane [GO:0005886]; adenylate cyclase activity [GO:0004016]; ATP binding [GO:0005524]; nucleotidyltransferase activity [GO:0016779]; second-messenger-mediated signaling [GO:0019932]	8	8	8	32,3	33,599	0	92,676	971130000	75		0,0363988	0,994155		0,305132015	0,954805139	0,055121613		0,162962604	0,878403941	-0,029758453		0,112221036	0,924928926	-0,03149147		0,098642429	0,917047463	-0,032435608		0,099796317	0,911652582	0,019630432	2	5	1	2	0	2	4	3	1
472	Q55499	Single-stranded DNA-binding protein 1 (SSB 1)	ssb slr0925	1	DNA replication [GO:0006260]		single-stranded DNA binding [GO:0003697]	single-stranded DNA binding [GO:0003697]; DNA replication [GO:0006260]	10	10	10	66,1	13,656	0	133,45	2560000000	82		0,295182	0,558862		0,057185307	0,97726404	-0,050753021		0,401170002	0,551572414	-0,211240005		0,600497949	0,438149153	-0,349026489		0,308372259	0,630689113	-0,2358181		1,152381608	0,107314775	-0,484067154	4	3	2	2	2	3	6	3	1
473	Q55502	Slr0930 protein	slr0930	1					12	12	12	35,1	49,359	0	148,32	1340200000	103		0,00211576	1		0,004105506	0,998698366	-0,00171051		0,020002765	0,984498125	0,004600525		0,148239873	0,899683849	0,042020035		0,096927046	0,92121074	-0,029601288		0,030014547	0,963655849	-0,010160065	4	4	3	3	4	3	2	2	2
474	Q55507	Ammonium transport protein	cysQ	1	phosphatidylinositol phosphorylation [GO:0046854]			phosphatidylinositol phosphorylation [GO:0046854]	8	8	8	38,5	32,197	0	164,63	987250000	126		0,220153	0,743681		0,324027774	0,926604278	0,121612167		1,014963986	0,327222018	0,238138962		1,003812139	0,359256236	0,27985878		0,125445317	0,868034965	0,074094391		1,187888438	0,201611746	0,255389786	2	3	3	2	4	1	4	4	4
475	Q55512	Aspartate-semialdehyde dehydrogenase (ASA dehydrogenase) (ASADH) (EC 1.2.1.11) (Aspartate-beta-semialdehyde dehydrogenase)	asd slr0549	1	diaminopimelate biosynthetic process [GO:0019877]; isoleucine biosynthetic process [GO:0009097]; lysine biosynthetic process via diaminopimelate [GO:0009089]; methionine biosynthetic process [GO:0009086]; threonine biosynthetic process [GO:0009088]	cytoplasm [GO:0005737]	aspartate-semialdehyde dehydrogenase activity [GO:0004073]; N-acetyl-gamma-glutamyl-phosphate reductase activity [GO:0003942]; NAD binding [GO:0051287]; NADP binding [GO:0050661]; protein dimerization activity [GO:0046983]	cytoplasm [GO:0005737]; aspartate-semialdehyde dehydrogenase activity [GO:0004073]; N-acetyl-gamma-glutamyl-phosphate reductase activity [GO:0003942]; NAD binding [GO:0051287]; NADP binding [GO:0050661]; protein dimerization activity [GO:0046983]; diaminopimelate biosynthetic process [GO:0019877]; isoleucine biosynthetic process [GO:0009097]; lysine biosynthetic process via diaminopimelate [GO:00…	13	13	13	40,5	36,641	0	315,81	4945800000	255		0,249298	0,875729		0,536705703	0,951834197	0,123216248		0,715466397	0,437735955	0,196856689		1,345627085	0,380740426	0,193923569		0,382144886	0,726617737	0,084521103		0,430417215	0,578316	0,119641495	5	11	8	7	9	6	11	10	6
476	Q55513	4-hydroxy-tetrahydrodipicolinate synthase (HTPA synthase) (EC 4.3.3.7)	dapA slr0550	1	diaminopimelate biosynthetic process [GO:0019877]; lysine biosynthetic process via diaminopimelate [GO:0009089]	cytoplasm [GO:0005737]	4-hydroxy-tetrahydrodipicolinate synthase [GO:0008840]	cytoplasm [GO:0005737]; 4-hydroxy-tetrahydrodipicolinate synthase [GO:0008840]; diaminopimelate biosynthetic process [GO:0019877]; lysine biosynthetic process via diaminopimelate [GO:0009089]	10	10	10	40,2	31,821	0	156,56	1799900000	109		0,0712331	0,970999		0,373355346	0,931614815	0,134700394		0,053464701	0,948907087	0,023012161		0,039547522	0,973646142	0,017372894		0,044838859	0,955208689	-0,019320679		0,089594933	0,885448441	0,038072586	1	4	4	5	5	4	4	5	2
477	Q55517	Sll0529 protein	sll0529	1	carbohydrate metabolic process [GO:0005975]		aldehyde-lyase activity [GO:0016832]	aldehyde-lyase activity [GO:0016832]; carbohydrate metabolic process [GO:0005975]	30	30	30	59,4	78,316	0	323,31	25188000000	756		0,321488	0,827507		0,398695045	0,929653543	0,091521072		0,394562432	0,764922232	0,052833557		0,472669267	0,714018967	0,085478592		0,615078404	0,511509434	0,179679108		0,241443365	0,767439931	-0,057314682	20	23	22	21	26	22	25	23	22
478	Q55522	Valine--tRNA ligase (EC 6.1.1.9) (Valyl-tRNA synthetase) (ValRS)	valS slr0557	1	valyl-tRNA aminoacylation [GO:0006438]	cytoplasm [GO:0005737]	aminoacyl-tRNA editing activity [GO:0002161]; ATP binding [GO:0005524]; valine-tRNA ligase activity [GO:0004832]	cytoplasm [GO:0005737]; aminoacyl-tRNA editing activity [GO:0002161]; ATP binding [GO:0005524]; valine-tRNA ligase activity [GO:0004832]; valyl-tRNA aminoacylation [GO:0006438]	35	35	35	41,8	102,74	0	323,31	11112000000	512		0,30123	0,931256		0,784990636	0,972713656	0,129926682		1,138079106	0,403757037	0,154050064		0,734745234	0,529237964	0,150029755		0,876775967	0,549612015	0,112958908		0,752100613	0,485088889	0,121321869	15	14	13	15	15	13	16	19	16
479	Q55524	Slr0320 protein	slr0320	1			catalytic activity [GO:0003824]; iron-sulfur cluster binding [GO:0051536]	catalytic activity [GO:0003824]; iron-sulfur cluster binding [GO:0051536]	5	5	5	14,9	60,644	0	31,116	242990000	36		0,80103	0,3435		0,716068664	1	-0,270338821		0,588850854	0,393116844	-0,347730637		0,825447622	0,378371002	-0,325957489		0,270519338	0,735175175	-0,112020493		0,353848585	0,521776344	0,259891129	1	1	1	1	0	1	1	1	1
480	Q55526	GTPase Era	era slr0321	1	ribosome biogenesis [GO:0042254]	cytoplasm [GO:0005737]; plasma membrane [GO:0005886]	GTP binding [GO:0005525]; rRNA binding [GO:0019843]	cytoplasm [GO:0005737]; plasma membrane [GO:0005886]; GTP binding [GO:0005525]; rRNA binding [GO:0019843]; ribosome biogenesis [GO:0042254]	7	7	7	28,9	34,791	0	10,194	266820000	38		0,397839	0,343496		0,003283925	0,997989591	0,005792618		0,002467805	0,994925241	-0,005166626		0,741786732	0,339413613	0,654172516		0,536066731	0,412145937	0,505522156		0,968172289	0,10225974	0,796510696	0	2	0	0	0	1	1	0	0
481	Q55527	CheA like protein	slr0322	1	chemotaxis [GO:0006935]	cytoplasm [GO:0005737]	phosphorelay sensor kinase activity [GO:0000155]	cytoplasm [GO:0005737]; phosphorelay sensor kinase activity [GO:0000155]; chemotaxis [GO:0006935]	33	33	32	39,5	120,56	0	233,3	4267600000	397		0,156939	0,95394		0,194159109	0,955992172	-0,051425552		0,067904316	0,941936809	-0,02057457		0,300217927	0,805414634	-0,062719727		0,202561595	0,844427046	-0,052748489		0,949278231	0,369215	-0,158901978	15	13	8	8	10	14	17	12	11
482	Q55528	Alpha-mannosidase	ams1	1	mannose metabolic process [GO:0006013]; protein deglycosylation [GO:0006517]	plasma membrane [GO:0005886]	alpha-mannosidase activity [GO:0004559]; carbohydrate binding [GO:0030246]	plasma membrane [GO:0005886]; alpha-mannosidase activity [GO:0004559]; carbohydrate binding [GO:0030246]; mannose metabolic process [GO:0006013]; protein deglycosylation [GO:0006517]	5	5	5	5,7	120,44	0	8,706	208860000	12		0,328242	0,46472		0,345690148	0,959877863	0,324077606		0,315988363	0,565645714	-0,366723251		0,220607283	0,729392016	0,227199554		0,093293408	0,878727429	-0,122988129		0,020044714	0,963830688	-0,026048279	1	1	1	0	0	1	2	0	0
483	Q55542	Slr0334 protein	slr0334	1					3	3	3	40	11,631	0,00055402	3,0816	270940000	27		0,0194373	0,989899		0,050488509	0,993299592	-0,023575974		0,046971648	0,952164214	0,017666626		0,272763192	0,765953668	-0,090407181		0,083676042	0,938107804	0,024162674		0,092337842	0,899454689	-0,026110077	1	1	0	0	1	1	1	0	1
484	Q55547	Sll0293 protein	sll0293	1					4	4	4	26,5	18,583	0	29,571	1002900000	70		0,275228	0,770153		0,45652326	0,963295455	-0,172919083		0,735283884	0,377874214	-0,261171722		0,750241653	0,412770318	-0,271298981		0,391127883	0,648682171	-0,134215546		0,457699144	0,521642241	-0,162514114	2	4	2	1	2	3	3	3	2
485	Q55557	Virginiamycin B lyase (EC 4.2.99.-) (Streptogramin B lyase)	sll0173	1	antibiotic catabolic process [GO:0017001]; response to antibiotic [GO:0046677]	outer membrane-bounded periplasmic space [GO:0030288]	carbon-oxygen lyase activity [GO:0016835]; hydrolase activity [GO:0016787]; magnesium ion binding [GO:0000287]	outer membrane-bounded periplasmic space [GO:0030288]; carbon-oxygen lyase activity [GO:0016835]; hydrolase activity [GO:0016787]; magnesium ion binding [GO:0000287]; antibiotic catabolic process [GO:0017001]; response to antibiotic [GO:0046677]	10	10	10	34,7	38,545	0	44,768	617560000	86		0,159136	0,625027		0,158728908	0,946291939	-0,166634369		0,466972939	0,449707989	-0,396229172		0,496575821	0,467950233	-0,420236969		0,12186765	0,839307761	-0,145407486		0,54947568	0,310914894	-0,4932724	4	1	5	3	1	4	2	3	3
486	Q55558	Sll0172 protein	sll0172	1		outer membrane-bounded periplasmic space [GO:0030288]		outer membrane-bounded periplasmic space [GO:0030288]	3	3	3	39,5	16,347	0	8,4153	513760000	78		0,0912388	0,795245		0,427720012	0,972008602	-0,259133148		0,04289587	0,947088489	-0,032082367		0,004909925	1	-0,003238678		0,089543793	0,896469799	0,06849823		0,27790254	0,607107212	-0,189427185	3	2	3	2	2	2	2	2	1
487	Q55559	Sll0169 protein	sll0169	1	division septum assembly [GO:0000917]	integral component of membrane [GO:0016021]		integral component of membrane [GO:0016021]; division septum assembly [GO:0000917]	17	17	17	33,1	79,423	0	232,96	1516900000	247		0,354549	0,92643		0,62699614	0,94045911	-0,08086319		0,107914523	0,912894992	-0,025756073		0,479933434	0,785984848	-0,053385544		0,665766616	0,611092784	-0,101741028		0,263497613	0,766483117	0,054209518	5	9	6	6	6	7	10	9	5
488	Q55562	Uroporphyrin-III synthase	hemD	1	oxidation-reduction process [GO:0055114]; siroheme biosynthetic process [GO:0019354]		uroporphyrin-III C-methyltransferase activity [GO:0004851]; uroporphyrinogen-III synthase activity [GO:0004852]	uroporphyrin-III C-methyltransferase activity [GO:0004851]; uroporphyrinogen-III synthase activity [GO:0004852]; oxidation-reduction process [GO:0055114]; siroheme biosynthetic process [GO:0019354]	4	4	4	9,3	58,689	0	10,547	4621300000	77		0,284939	0,733311		0,069609673	0,979025042	-0,029848099		0,588688594	0,469432756	-0,212022781		0,543846355	0,534277254	-0,197865295		0,527268397	0,552104218	-0,166613388		0,080240907	0,893267673	0,037154007	3	3	2	2	2	2	4	5	3
489	Q55574	Orotate phosphoribosyltransferase (OPRT) (OPRTase) (EC 2.4.2.10)	pyrE slr0185	1	'de novo' UMP biosynthetic process [GO:0044205]		orotate phosphoribosyltransferase activity [GO:0004588]	orotate phosphoribosyltransferase activity [GO:0004588]; 'de novo' UMP biosynthetic process [GO:0044205]	8	8	8	32,8	21,372	0	164,23	2360800000	162		0,412704	0,593686		0,193172228	0,94280308	0,109667206		0,659695431	0,37925741	0,30567627		1,118717727	0,305501805	0,404199982		0,614195355	0,441056836	0,274986267		0,587202927	0,373835821	0,264717865	4	5	7	5	5	5	5	7	4
490	Q55578	Uncharacterized RNA pseudouridine synthase slr0361 (EC 5.4.99.-) (RNA pseudouridylate synthase) (RNA-uridine isomerase)	slr0361	1	enzyme-directed rRNA pseudouridine synthesis [GO:0000455]	cytosol [GO:0005829]	pseudouridine synthase activity [GO:0009982]; RNA binding [GO:0003723]	cytosol [GO:0005829]; pseudouridine synthase activity [GO:0009982]; RNA binding [GO:0003723]; enzyme-directed rRNA pseudouridine synthesis [GO:0000455]	6	6	6	27,3	28,228	0	53,96	533120000	69		0,582385	0,747347		0,232272415	0,939451069	-0,092974472		0,948415234	0,362622074	-0,215314865		1,139414226	0,365641256	-0,238489532		0,383550437	0,691543933	-0,10173111		0,26074617	0,717193606	-0,077733994	2	4	2	2	2	3	3	3	1
491	Q55579	Slr0362 protein	slr0362	1					6	6	6	46,7	20,576	0	39,195	903460000	90		0,871012	0,363724		0,016661033	0,993990854	-0,009345627		0,097501161	0,872562448	0,060047913		0,081768439	0,927875	-0,043148422		0,750908825	0,393090909	0,277122879		0,933033255	0,152267631	0,483000183	3	1	3	3	3	0	4	3	2
492	Q55584	Cation or drug efflux system protein	slr0369	1	transport [GO:0006810]	integral component of membrane [GO:0016021]	transporter activity [GO:0005215]	integral component of membrane [GO:0016021]; transporter activity [GO:0005215]; transport [GO:0006810]	22	22	22	27,2	117,56	0	323,31	3482400000	306		0,158273	0,867039		0,064589789	0,982181515	-0,030247879		0,287020192	0,7096139	-0,100654602		0,244554165	0,760117532	-0,114591599		0,595094099	0,517609626	-0,181402206		0,602118815	0,402383595	-0,216310883	9	9	12	7	9	8	10	11	9
493	Q55586	Regulation of the phosphate regulon	sphS	1		intracellular [GO:0005622]	ATP binding [GO:0005524]; phosphorelay sensor kinase activity [GO:0000155]	intracellular [GO:0005622]; ATP binding [GO:0005524]; phosphorelay sensor kinase activity [GO:0000155]	7	7	7	13,5	48,621	0	29,948	203230000	18		0,115838	0,641286		0,139649998	0,954550785	0,159205246		0,88123445	0,237092784	0,567565155		0,155920919	0,805153558	0,187610626		0,750120869	0,321589041	0,504963684		0,215388686	0,631226415	0,299240875	0	1	0	0	2	0	0	0	1
494	Q55595	Probable lactoylglutathione lyase (EC 4.4.1.5) (Aldoketomutase) (Glyoxalase I) (Glx I) (Ketone-aldehyde mutase) (Methylglyoxalase) (S-D-lactoylglutathione methylglyoxal lyase)	gloA slr0381	1			lactoylglutathione lyase activity [GO:0004462]; metal ion binding [GO:0046872]	lactoylglutathione lyase activity [GO:0004462]; metal ion binding [GO:0046872]	4	4	4	29,8	14,665	0	36,58	209200000	40		0,14566	0,582917		0,471682981	1	0,352124786		0,18710612	0,715496638	0,254635239		1,038218591	0,293105691	0,543745041		0,039320457	0,947283815	0,04299202		0,060765658	0,892523394	-0,073142242	0	2	0	0	1	0	3	3	0
495	Q55610	Protein translocase subunit SecD	secD slr0774	1	intracellular protein transport [GO:0006886]; protein transport [GO:0015031]	integral component of plasma membrane [GO:0005887]; intracellular [GO:0005622]	P-P-bond-hydrolysis-driven protein transmembrane transporter activity [GO:0015450]	integral component of plasma membrane [GO:0005887]; intracellular [GO:0005622]; P-P-bond-hydrolysis-driven protein transmembrane transporter activity [GO:0015450]; intracellular protein transport [GO:0006886]; protein transport [GO:0015031]	17	17	17	48,7	50,468	0	233,53	5618700000	274		0,38137	0,933939		0,45633384	0,935655758	-0,067248917		0,176866893	0,853530988	0,038406754		0,493690468	0,767888462	0,058018494		0,713457873	0,654957655	0,080843735		0,15272548	0,913707621	-0,014798355	4	9	8	6	8	10	7	10	5
496	Q55614	High-affinity branched-chain amino acid transport ATP-binding protein	livG	1			ATPase activity [GO:0016887]; ATP binding [GO:0005524]	ATP binding [GO:0005524]; ATPase activity [GO:0016887]	7	7	7	28,4	41,194	0	101,98	707040000	104		0,454203	0,72509		0,779168633	0,991083333	0,135736084		0,19914442	0,78761165	0,070280838		0,379349273	0,719925	0,09725914		0,928362949	0,516704336	0,12362175		0,454230614	0,556886128	-0,131686401	3	4	2	1	2	3	3	3	3
497	Q55618	Transport permease protein	ycf38	1	transport [GO:0006810]	ATP-binding cassette (ABC) transporter complex [GO:0043190]		ATP-binding cassette (ABC) transporter complex [GO:0043190]; transport [GO:0006810]	3	3	3	15,6	31,677	0	5,0958	648770000	31		0,18681	0,512944		0,318655781	0,972097166	-0,616129684		0,220717952	0,757804067	0,091988754		0,674171447	0,486086438	0,202329636		0,022899784	0,978641395	-0,010184479		0,121377678	0,847467543	-0,049945068	2	1	1	1	1	1	2	1	0
498	Q55619	ABC transporter	sll0759	1			ATPase activity [GO:0016887]; ATP binding [GO:0005524]	ATP binding [GO:0005524]; ATPase activity [GO:0016887]	17	17	17	68,9	37,629	0	301,01	3433000000	317		0,169217	0,785194		0,520098525	0,989388506	-0,203162003		0,033292606	0,96274788	0,02012291		0,07683122	0,943426731	0,026996231		0,059814806	0,944793103	-0,020795441		0,243978155	0,669809524	0,126292801	7	12	11	9	10	7	13	10	9
499	Q55625	Ribosome-binding factor A	rbfA sll0754	1	rRNA processing [GO:0006364]	cytoplasm [GO:0005737]		cytoplasm [GO:0005737]; rRNA processing [GO:0006364]	5	5	5	45,9	14,749	0	83,14	735180000	48		0,16529	0,902038		0,43234127	0,933527607	-0,122888947		0,085429273	0,918784282	-0,027739334		0,428862287	0,67546841	-0,111703491		0,549982582	0,530893726	-0,178549957		0,073857632	0,914679128	-0,02298584	2	2	2	2	3	1	1	1	1
500	Q55629	L-amino acid dehydrogenase (EC 1.4.5.-) (L-amino acid:plastoquinone oxidoreductase) (L-arginine dehydrogenase)	slr0782	1	arginine catabolic process [GO:0006527]	thylakoid membrane [GO:0042651]	metal ion binding [GO:0046872]; oxidoreductase activity [GO:0016491]	thylakoid membrane [GO:0042651]; metal ion binding [GO:0046872]; oxidoreductase activity [GO:0016491]; arginine catabolic process [GO:0006527]	6	6	6	15,5	51,404	0	34,715	282320000	62		0,427605	0,593291		0,847771187	1	-0,441550446		0,941186806	0,328416058	-0,256710815		0,47516835	0,593519527	-0,154817963		0,475064418	0,567441637	-0,170285416		0,917726805	0,294306849	-0,218898392	1	1	0	3	2	2	2	1	1
501	Q55631	Sll0749 protein	sll0749	1					3	3	3	33,2	21,201	0	33,907	216150000	46		0,227834	0,443118		0,438414832	1	0,532324982		0,324114675	0,547501746	0,426737976		0,025157045	0,972417311	0,043130112		0,144691989	0,793838863	-0,302506256		0,158746878	0,706925959	-0,288845062	1	4	2	2	1	1	2	3	1
502	Q55641	Ribonuclease D	rnd	1			3'-5' exonuclease activity [GO:0008408]; nucleic acid binding [GO:0003676]	3'-5' exonuclease activity [GO:0008408]; nucleic acid binding [GO:0003676]	11	11	11	59,9	24,403	0	241,01	3100600000	172		0,259626	0,88801		0,161381607	0,95783411	-0,04455986		0,952517334	0,420564841	-0,163264084		0,56371756	0,537381333	-0,183993149		0,662097533	0,56430355	-0,127102661		0,528038934	0,608282946	-0,085959625	6	6	6	4	5	7	4	7	6
503	Q55643	4-hydroxy-3-methylbut-2-enyl diphosphate reductase (HMBPP reductase) (EC 1.17.7.4)	ispH lytB slr0348	1	dimethylallyl diphosphate biosynthetic process [GO:0050992]; isopentenyl diphosphate biosynthetic process, methylerythritol 4-phosphate pathway [GO:0019288]		4-hydroxy-3-methylbut-2-en-1-yl diphosphate reductase activity [GO:0051745]; 4 iron, 4 sulfur cluster binding [GO:0051539]; metal ion binding [GO:0046872]	4 iron, 4 sulfur cluster binding [GO:0051539]; 4-hydroxy-3-methylbut-2-en-1-yl diphosphate reductase activity [GO:0051745]; metal ion binding [GO:0046872]; dimethylallyl diphosphate biosynthetic process [GO:0050992]; isopentenyl diphosphate biosynthetic process, methylerythritol 4-phosphate pathway [GO:0019288]	8	8	8	25,1	42,415	0	40,034	839960000	71		0,274909	0,705965		0,124494164	0,959068901	0,060653305		0,269691965	0,680430708	0,146583939		0,098049196	0,91321608	0,049514771		0,639449684	0,413029703	0,314998627		0,648870963	0,36168262	0,241413498	1	2	2	2	1	2	3	2	1
504	Q55653	Histidine--tRNA ligase (EC 6.1.1.21) (Histidyl-tRNA synthetase) (HisRS)	hisS slr0357	1	histidyl-tRNA aminoacylation [GO:0006427]	cytoplasm [GO:0005737]	ATP binding [GO:0005524]; histidine-tRNA ligase activity [GO:0004821]	cytoplasm [GO:0005737]; ATP binding [GO:0005524]; histidine-tRNA ligase activity [GO:0004821]; histidyl-tRNA aminoacylation [GO:0006427]	11	11	11	28,6	49,171	0	286,95	743340000	115		0,1195	0,896191		0,101164994	0,966152284	0,027727127		0,387713727	0,607610811	0,149269104		0,405489515	0,685597417	0,111083984		0,645959133	0,472680973	0,20741539		0,930237262	0,394673147	0,14672699	1	4	3	3	3	3	3	3	4
505	Q55658	Sll0023 protein	sll0023	1					4	4	4	8,3	51,653	0	12,774	212080000	30		0,0732424	0,731451		0,318801454	0,94980292	-0,377064896		0,073166631	0,904659592	-0,058268738		0,534813107	0,471963636	-0,31913681		0,443887468	0,505087912	-0,339772415		0,861907678	0,190422819	-0,429792023	1	1	1	0	0	1	2	2	2
506	Q55660	Slr0001 protein	slr0001	1			FMN binding [GO:0010181]; riboflavin reductase (NADPH) activity [GO:0042602]	FMN binding [GO:0010181]; riboflavin reductase (NADPH) activity [GO:0042602]	10	10	10	60	17,451	0	165,97	3681600000	172		0,728626	0,429616		0,412209713	0,962494297	0,205940628		0,817338157	0,316265655	0,337517166		1,069116383	0,305956522	0,437350464		0,094219715	0,89724057	0,059440231		0,05613733	0,914359533	-0,03401947	6	5	5	4	6	5	6	8	3
507	Q55661	Nuclease SbcCD subunit D	sbcD sll0021	1	DNA recombination [GO:0006310]; DNA replication [GO:0006260]		3'-5' exonuclease activity [GO:0008408]; endonuclease activity [GO:0004519]	3'-5' exonuclease activity [GO:0008408]; endonuclease activity [GO:0004519]; DNA recombination [GO:0006310]; DNA replication [GO:0006260]	4	4	4	13,7	45,939	0	7,567	132490000	47		0,227134	0,747594		0,993452391	1	-0,195147705		0,183616698	0,775871429	-0,090961456		0,639079867	0,532327869	-0,16797905		0,593172045	0,4696	-0,243996429		1,264538183	0,147956124	-0,308795547	2	4	3	1	0	1	3	2	2
508	Q55662	ATP-dependent Clp protease regulatory subunit	clpC	1			ATP binding [GO:0005524]; peptidase activity [GO:0008233]	ATP binding [GO:0005524]; peptidase activity [GO:0008233]	79	79	75	82,1	91,173	0	323,31	72455000000	1709		0,475418	0,852512		0,181908086	0,959508971	-0,043182373		0,073393543	0,948100392	-0,01579361		0,371320308	0,770331735	-0,066569901		0,358120183	0,758058824	-0,071440887		0,554637343	0,533730074	0,123638535	47	58	61	59	43	50	59	57	66
509	Q55664	Fructose-bisphosphate aldolase class 2 (FBP aldolase) (FBPA) (EC 4.1.2.13) (Fructose-1,6-bisphosphate aldolase) (Fructose-bisphosphate aldolase class II)	fbaA fda sll0018	1	glycolytic process [GO:0006096]		fructose-bisphosphate aldolase activity [GO:0004332]; zinc ion binding [GO:0008270]	fructose-bisphosphate aldolase activity [GO:0004332]; zinc ion binding [GO:0008270]; glycolytic process [GO:0006096]	23	23	23	58,8	38,972	0	323,31	157960000000	835		0,372558	0,826812		0,510522224	0,936214925	-0,099743652		1,038319214	0,359792295	-0,199858856		1,101122032	0,397259542	-0,200897598		0,73331151	0,525112549	-0,139064407		0,157513897	0,8126914	-0,058463287	22	23	30	23	30	26	27	30	24
510	Q55667	Slr0006 protein	slr0006	1	regulation of translational fidelity [GO:0006450]; tRNA threonylcarbamoyladenosine modification [GO:0002949]	cytoplasm [GO:0005737]	double-stranded RNA binding [GO:0003725]; nucleotidyltransferase activity [GO:0016779]; tRNA binding [GO:0000049]	cytoplasm [GO:0005737]; double-stranded RNA binding [GO:0003725]; nucleotidyltransferase activity [GO:0016779]; tRNA binding [GO:0000049]; regulation of translational fidelity [GO:0006450]; tRNA threonylcarbamoyladenosine modification [GO:0002949]	8	8	8	50,7	23,373	0	95,578	3244700000	114		0,856011	0,527195		0,351660311	0,939295455	-0,126080322		1,067322436	0,256545035	-0,328548431		1,209368022	0,311644128	-0,351139069		1,062698302	0,328666667	-0,265371704		0,957690489	0,202194175	-0,32749939	5	4	5	5	3	2	5	4	5
511	Q55669	Carboxyl-terminal-processing protease (EC 3.4.21.102) (CtpA)	ctpA slr0008	1	signal transduction [GO:0007165]	outer membrane-bounded periplasmic space [GO:0030288]; thylakoid lumen [GO:0031977]	endopeptidase activity [GO:0004175]; serine-type peptidase activity [GO:0008236]	outer membrane-bounded periplasmic space [GO:0030288]; thylakoid lumen [GO:0031977]; endopeptidase activity [GO:0004175]; serine-type peptidase activity [GO:0008236]; signal transduction [GO:0007165]	4	4	4	15	46,69	0	18,74	112030000	29		0,0608038	0,757627		0,05971338	0,968670638	-0,086329651		0,257378322	0,63085291	0,322190475		0,027889535	0,972419255	0,037340927		0,002441666	0,997188148	-0,003635025		0,27427825	0,576012109	0,295209122	0	1	0	0	2	1	1	1	1
512	Q55674	Fumarate hydratase class II (Fumarase C) (EC 4.2.1.2) (Aerobic fumarase) (Iron-independent fumarase)	fumC slr0018	1	fumarate metabolic process [GO:0006106]; malate metabolic process [GO:0006108]; tricarboxylic acid cycle [GO:0006099]	tricarboxylic acid cycle enzyme complex [GO:0045239]	fumarate hydratase activity [GO:0004333]	tricarboxylic acid cycle enzyme complex [GO:0045239]; fumarate hydratase activity [GO:0004333]; fumarate metabolic process [GO:0006106]; malate metabolic process [GO:0006108]; tricarboxylic acid cycle [GO:0006099]	6	6	6	17,8	49,687	0	20,486	785060000	57		0,538798	0,708311		0,581354437	0,964357853	0,143772125		0,430972056	0,64508866	0,103279114		0,57109357	0,55737931	0,158881378		0,241936739	0,808193309	0,066310883		0,31096576	0,63611985	-0,114341736	1	2	0	1	1	2	1	1	1
513	Q55680	Uncharacterized protein sll0005	sll0005	1			ATP binding [GO:0005524]; protein kinase activity [GO:0004672]	ATP binding [GO:0005524]; protein kinase activity [GO:0004672]	9	9	9	16,3	77,347	0	97,682	4905500000	87		0,010306	0,988101		0,3904625	0,931014129	-0,148256302		0,069811573	0,923362179	-0,033509064		0,328890621	0,720299065	-0,112031937		0,176589266	0,807814299	-0,101836777		0,227033945	0,690312388	-0,115676498	1	1	2	1	2	1	1	3	2
514	Q55683	Penicillin-binding protein 1A	ponA	1		integral component of membrane [GO:0016021]	penicillin binding [GO:0008658]; transferase activity [GO:0016740]	integral component of membrane [GO:0016021]; penicillin binding [GO:0008658]; transferase activity [GO:0016740]	13	13	13	26	95,558	0	81,743	584040000	78		0,457932	0,475196		0,540932212	1	0,396184921		0,394399835	0,519990303	0,302855301		0,188659944	0,770452107	0,169252014		0,199077819	0,743976331	0,191217422		0,816569578	0,170299824	0,590143204	4	1	2	0	3	2	0	2	2
515	Q55687	Long-chain acyl-[acyl-carrier-protein] reductase (AAR) (Acyl-ACP reductase) (EC 1.2.1.80)	sll0209	1	copper ion import [GO:0015677]; ferric iron import across plasma membrane [GO:0098706]	integral component of plasma membrane [GO:0005887]	cupric reductase activity [GO:0008823]; ferric-chelate reductase (NADPH) activity [GO:0052851]	integral component of plasma membrane [GO:0005887]; cupric reductase activity [GO:0008823]; ferric-chelate reductase (NADPH) activity [GO:0052851]; copper ion import [GO:0015677]; ferric iron import across plasma membrane [GO:0098706]	8	8	8	19,4	37,65	0	54,773	2241900000	67		0,339794	0,86882		0,178961982	0,957031373	-0,056100845		0,986858921	0,394187311	-0,17611618		1,081580322	0,442441128	-0,164921188		0,306532429	0,787068702	-0,065990448		0,540048299	0,497934066	-0,151483154	1	2	3	3	4	2	2	1	3
516	Q55690	Glycine--tRNA ligase beta subunit (EC 6.1.1.14) (Glycyl-tRNA synthetase beta subunit) (GlyRS)	glyS slr0220	1	arginyl-tRNA aminoacylation [GO:0006420]; glycyl-tRNA aminoacylation [GO:0006426]	cytoplasm [GO:0005737]	arginine-tRNA ligase activity [GO:0004814]; ATP binding [GO:0005524]; glycine-tRNA ligase activity [GO:0004820]	cytoplasm [GO:0005737]; arginine-tRNA ligase activity [GO:0004814]; ATP binding [GO:0005524]; glycine-tRNA ligase activity [GO:0004820]; arginyl-tRNA aminoacylation [GO:0006420]; glycyl-tRNA aminoacylation [GO:0006426]	31	31	31	60,5	80,05	0	323,31	8562700000	377		0,704473	0,617529		0,374129885	0,934619048	0,134813309		1,200699756	0,247980296	0,305368042		1,048874622	0,357783908	0,269522095		0,534101602	0,524197147	0,193270493		1,040779259	0,196910299	0,304626846	5	14	11	7	14	7	12	8	8
517	Q55712	Slr0635 protein	slr0635	1	iron-sulfur cluster assembly [GO:0016226]		transferase activity [GO:0016740]	transferase activity [GO:0016740]; iron-sulfur cluster assembly [GO:0016226]	11	11	11	40,1	35,538	0	109,94	1708200000	223		0,222573	0,717159		0,015442572	0,99340458	-0,01330452		0,733931771	0,411032258	0,217663574		0,67560322	0,473981481	0,219586182		0,718181292	0,447330317	0,210351181		1,025117283	0,216263323	0,277164078	6	6	2	5	8	6	9	7	2
518	Q55726	Sll0602 protein	sll0602	1		integral component of membrane [GO:0016021]	protein serine/threonine phosphatase activity [GO:0004722]	integral component of membrane [GO:0016021]; protein serine/threonine phosphatase activity [GO:0004722]	12	12	12	26,2	77,763	0	128,71	1138300000	143		0,675645	0,543607		0,114093466	0,958603464	-0,057070541		0,730183973	0,420068966	-0,207713318		0,582447679	0,512074499	-0,213903046		0,997018192	0,305512953	-0,34957962		1,450432148	0,107264957	-0,344385529	4	6	6	5	4	6	6	5	5
519	Q55730	Slr0650 protein	slr0650	1					11	11	11	49,8	22,501	0	257,61	4593100000	178		0,0219354	0,995154		0,123006052	0,962389286	-0,040690613		0,057936202	0,947458366	-0,01701088		0,03426147	0,977443678	-0,010649109		0,100134826	0,915363934	-0,033083725		0,414519107	0,614122371	-0,09762001	5	5	6	5	6	4	6	6	6
520	Q55733	OmpR subfamily	sll0396	1	phosphorelay signal transduction system [GO:0000160]; regulation of transcription, DNA-templated [GO:0006355]; transcription, DNA-templated [GO:0006351]	intracellular [GO:0005622]	DNA binding [GO:0003677]	intracellular [GO:0005622]; DNA binding [GO:0003677]; phosphorelay signal transduction system [GO:0000160]; regulation of transcription, DNA-templated [GO:0006355]; transcription, DNA-templated [GO:0006351]	6	6	6	22,3	25,97	0	28,162	574140000	76		0,427635	0,688766		1,103909535	1	0,159122086		0,78548075	0,478034076	0,150073624		0,861807776	0,420868651	0,221125793		0,1576593	0,839191375	-0,079253006		0,060722653	0,921949035	0,022284317	2	2	2	2	3	3	4	3	3
521	Q55734	Sll0395 protein	sll0395	1					9	9	8	37,3	23,752	0	69,972	1930800000	85		0,640895	0,495192		0,357746233	0,934572831	-0,190641403		0,947372805	0,2560553	-0,395305252		0,972263242	0,324987805	-0,421834183		0,877773189	0,32295612	-0,363147354		0,997710413	0,158666667	-0,405844879	3	2	3	4	2	2	5	4	3
522	Q55736	Na(+)/H(+) antiporter NhaS5 (Sodium/proton antiporter NhaS5)	nhaS5 napA slr0415	1	response to stress [GO:0006950]; sodium ion transport [GO:0006814]	integral component of membrane [GO:0016021]	solute:proton antiporter activity [GO:0015299]	integral component of membrane [GO:0016021]; solute:proton antiporter activity [GO:0015299]; response to stress [GO:0006950]; sodium ion transport [GO:0006814]	4	4	4	8,3	75,547	0	22,324	182850000	63		0,806987	0,342538		0,288464667	0,933217391	-0,267009735		0,719263927	0,370769231	0,290106964		0,50679136	0,524675978	0,244525528		1,082998411	0,271254019	0,404056931		0,169120029	0,758225303	0,097249603	0	0	1	2	2	1	1	2	0
523	Q55746	Acyl-[acyl-carrier-protein]--UDP-N-acetylglucosamine O-acyltransferase (UDP-N-acetylglucosamine acyltransferase) (EC 2.3.1.129)	lpxA sll0379	1	lipid A biosynthetic process [GO:0009245]	cytoplasm [GO:0005737]	acyl-[acyl-carrier-protein]-UDP-N-acetylglucosamine O-acyltransferase activity [GO:0008780]	cytoplasm [GO:0005737]; acyl-[acyl-carrier-protein]-UDP-N-acetylglucosamine O-acyltransferase activity [GO:0008780]; lipid A biosynthetic process [GO:0009245]	11	11	11	46,4	30,002	0	269,57	3713800000	217		0,543308	0,701561		0,008533665	0,995360239	0,003369904		0,097493552	0,909309562	0,030397034		0,405705487	0,65981676	0,131945419		0,621951094	0,518021277	0,170651245		1,257126102	0,188505902	0,257400131	5	4	6	4	8	6	6	7	6
524	Q55747	Slr0420 protein	slr0420	1					10	10	10	54,2	24,472	0	120,93	1427200000	115		0,0491477	0,932348		0,118730217	0,959649387	0,074432755		0,133406415	0,830003442	0,079103088		0,001930037	1	-0,001309204		0,29789443	0,671337634	0,172164536		0,284348056	0,610235977	0,170804596	5	1	4	2	4	2	4	3	2
525	Q55750	Transcription-repair-coupling factor (TRCF) (EC 3.6.4.-)	mfd sll0377	1	DNA repair [GO:0006281]	cytoplasm [GO:0005737]	ATP binding [GO:0005524]; damaged DNA binding [GO:0003684]; helicase activity [GO:0004386]	cytoplasm [GO:0005737]; ATP binding [GO:0005524]; damaged DNA binding [GO:0003684]; helicase activity [GO:0004386]; DNA repair [GO:0006281]	18	18	18	20	134,53	0	136,48	1016400000	194		0,142544	0,890579		0,303983686	0,929025773	0,11582222		0,238081041	0,752498594	0,091444016		0,02079089	0,980941534	0,01215477		0,567419048	0,530929215	0,173448944		0,467973853	0,495146315	0,183267212	6	6	3	2	3	3	8	8	2
526	Q55751	Sll0376 protein	sll0376	1		integral component of membrane [GO:0016021]		integral component of membrane [GO:0016021]	3	3	3	30,7	11,372	0	96,051	283910000	56		0,833263	0,223966		0,682398617	1	0,992856216		0,723165783	0,248582716	1,06419754		1,047609446	0,296290909	1,295888519		0,407501782	0,477136364	0,657488632		0,031932567	0,936042945	0,063169861	0	2	1	1	2	3	3	2	1
527	Q55753	High-affinity branched-chain amino acid transport ATP-binding protein	braG or livF	1			ATPase activity [GO:0016887]; ATP binding [GO:0005524]	ATP binding [GO:0005524]; ATPase activity [GO:0016887]	9	9	9	44,6	27,424	0	52,39	1219100000	108		0,133459	0,933802		0,260922641	0,933532315	-0,099031448		0,325960745	0,68047505	-0,110322571		0,386987319	0,675755191	-0,125415802		0,084517205	0,917586319	-0,037134171		0,560802278	0,459373439	-0,174923706	3	6	3	2	3	4	4	3	3
528	Q55756	Carbamoyl-phosphate synthase large chain (EC 6.3.5.5) (Carbamoyl-phosphate synthetase ammonia chain)	carB sll0370	1	'de novo' UMP biosynthetic process [GO:0044205]; arginine biosynthetic process [GO:0006526]; urea cycle [GO:0000050]	cytoplasm [GO:0005737]	ATP binding [GO:0005524]; carbamoyl-phosphate synthase (ammonia) activity [GO:0004087]; carbamoyl-phosphate synthase (glutamine-hydrolyzing) activity [GO:0004088]; metal ion binding [GO:0046872]	cytoplasm [GO:0005737]; ATP binding [GO:0005524]; carbamoyl-phosphate synthase (ammonia) activity [GO:0004087]; carbamoyl-phosphate synthase (glutamine-hydrolyzing) activity [GO:0004088]; metal ion binding [GO:0046872]; 'de novo' UMP biosynthetic process [GO:0044205]; arginine biosynthetic process [GO:0006526]; urea cycle [GO:0000050]	61	61	61	66	119,03	0	323,31	25553000000	1069		0,0841216	0,98495		0,195375748	0,959446465	0,05993042		0,10346449	0,907990236	0,030276489		0,06400083	0,959294304	-0,019098282		0,132998954	0,899643333	0,034260178		0,496939537	0,577346693	0,105816269	24	37	28	25	29	30	40	35	27
529	Q55770	Sll0185 protein	sll0185	1	DNA-templated transcription, termination [GO:0006353]			DNA-templated transcription, termination [GO:0006353]	15	15	15	50,1	46,993	0	323,31	3257800000	188		0,429448	0,495815		0,395287067	0,955922399	0,18578186		1,126777014	0,180390977	0,57387352		1,072239399	0,31152	0,398954391		0,944969799	0,312421569	0,353032684		0,435940266	0,429951106	0,333243561	5	9	4	3	6	7	7	5	4
530	Q55771	Heterodisulfide reductase subunit B	hdrB	1					6	6	6	31,9	32,571	0	76,027	728820000	80		0,515949	0,571947		0,243866499	0,93978022	-0,125997162		0,792725278	0,353111492	-0,280168915		0,555622704	0,480288722	-0,280500793		1,066231793	0,280641975	-0,390486526		0,870745619	0,230792683	-0,320358276	1	2	3	5	2	2	2	6	1
531	Q55806	Threonine--tRNA ligase (EC 6.1.1.3) (Threonyl-tRNA synthetase) (ThrRS)	thrS sll0078	1	threonyl-tRNA aminoacylation [GO:0006435]	cytoplasm [GO:0005737]	ATP binding [GO:0005524]; metal ion binding [GO:0046872]; threonine-tRNA ligase activity [GO:0004829]; tRNA binding [GO:0000049]	cytoplasm [GO:0005737]; ATP binding [GO:0005524]; metal ion binding [GO:0046872]; threonine-tRNA ligase activity [GO:0004829]; tRNA binding [GO:0000049]; threonyl-tRNA aminoacylation [GO:0006435]	28	28	28	51,2	68,872	0	323,31	10686000000	552		0,0154577	1		0,076059086	0,989240589	0,017040253		0,073281329	0,966331797	0,008304596		0,259861332	0,89855546	0,029902267		0,160374844	0,943201273	-0,014093018		0,09884311	0,927528868	-0,013505554	16	18	17	15	17	13	20	17	16
532	Q55816	ABC transporter	sll0489	1			ATPase activity [GO:0016887]; ATP binding [GO:0005524]	ATP binding [GO:0005524]; ATPase activity [GO:0016887]	4	4	4	16,7	37,931	0	13,806	464120000	47		0,728702	0,274236		0,036006308	0,989792228	0,020147324		0,337369649	0,601595628	-0,201847839		0,370313012	0,585858881	-0,263160706		0,16672423	0,832492754	-0,080385971		0,884671393	0,111528926	-0,957743835	1	1	1	2	2	2	1	3	1
533	Q55818	Sll0487 protein	sll0487	1					11	11	11	32,6	45,847	0	252,52	2951700000	200		0,115731	0,957406		0,122646719	0,961831978	-0,045609665		0,430272521	0,634334372	0,109033585		0,086548024	0,934417618	0,032224274		0,26476738	0,77494514	0,082084274		0,083017517	0,899385827	0,029022598	5	7	4	6	6	9	7	5	4
534	Q55822	CobW protein	cobW	1	cobalamin biosynthetic process [GO:0009236]			cobalamin biosynthetic process [GO:0009236]	14	14	14	46,3	38,955	0	253,86	3699300000	280		0,323447	0,742246		0,815987768	1	0,214999771		0,796550227	0,374711324	0,241201782		0,528771267	0,524128134	0,226506424		0,817781908	0,409898649	0,227679062		0,194848743	0,780906438	0,063059998	7	8	8	7	10	9	10	11	6
535	Q55823	Ycf66-like protein	slr0503	1					9	9	9	34,4	37,633	0	323,31	1309000000	187		0,41606	0,669466		0,007557896	0,997574309	0,002626419		0,399805307	0,673341341	-0,09270668		0,575960377	0,477445783	-0,266017151		0,554289278	0,609171068	-0,116625595		0,378968494	0,663608495	0,080045319	7	6	7	5	7	7	6	7	6
536	Q55828	LL-diaminopimelate aminotransferase (DAP-AT) (DAP-aminotransferase) (LL-DAP-aminotransferase) (EC 2.6.1.83)	dapL sll0480	1	lysine biosynthetic process via diaminopimelate [GO:0009089]		L,L-diaminopimelate aminotransferase activity [GO:0010285]; pyridoxal phosphate binding [GO:0030170]	L,L-diaminopimelate aminotransferase activity [GO:0010285]; pyridoxal phosphate binding [GO:0030170]; lysine biosynthetic process via diaminopimelate [GO:0009089]	26	26	26	64,6	45,087	0	323,31	24134000000	735		0,324242	0,970227		0,39790994	0,935202899	-0,07245369		0,093639421	0,938047619	-0,017825699		0,305627872	0,839314798	-0,045320129		0,144201392	0,901829611	0,029819107		0,250282417	0,791866553	0,047035217	17	24	21	23	22	26	23	25	22
537	Q55835	Iron uptake protein A2 (Iron deficiency-induced protein A) (PP2)	futA2 idiA slr0513	1	ion transport [GO:0006811]; iron ion homeostasis [GO:0055072]	outer membrane-bounded periplasmic space [GO:0030288]; thylakoid membrane [GO:0042651]	metal ion binding [GO:0046872]	outer membrane-bounded periplasmic space [GO:0030288]; thylakoid membrane [GO:0042651]; metal ion binding [GO:0046872]; ion transport [GO:0006811]; iron ion homeostasis [GO:0055072]	20	20	20	63	38,155	0	323,31	13211000000	461		0,0470152	0,853932		0,199357814	0,942835192	0,231244278		0,057540907	0,934173429	-0,033789825		0,131792307	0,862392952	-0,086777115		0,112946273	0,877294421	-0,069007111		0,175271289	0,744867428	-0,110842133	10	14	10	11	15	13	14	21	12
538	Q55837	Uncharacterized protein slr0516	slr0516	1					7	7	7	56,6	17,867	0	93,676	429210000	63		0,095741	0,804796		0,186642656	0,956215873	0,084746552		0,078065572	0,909768045	0,041403198		0,279548006	0,668563193	-0,253166962		0,055692478	0,945888101	0,024911118		0,069439751	0,899463299	-0,039249802	4	3	2	2	2	1	1	2	1
539	Q55848	Ribose-phosphate pyrophosphokinase (RPPK) (EC 2.7.6.1) (5-phospho-D-ribosyl alpha-1-diphosphate) (Phosphoribosyl diphosphate synthase) (Phosphoribosyl pyrophosphate synthase) (P-Rib-PP synthase) (PRPP synthase) (PRPPase)	prs prsA sll0469	1	5-phosphoribose 1-diphosphate biosynthetic process [GO:0006015]; nucleoside metabolic process [GO:0009116]; nucleotide biosynthetic process [GO:0009165]; ribonucleoside monophosphate biosynthetic process [GO:0009156]	cytoplasm [GO:0005737]	ATP binding [GO:0005524]; kinase activity [GO:0016301]; magnesium ion binding [GO:0000287]; ribose phosphate diphosphokinase activity [GO:0004749]	cytoplasm [GO:0005737]; ATP binding [GO:0005524]; kinase activity [GO:0016301]; magnesium ion binding [GO:0000287]; ribose phosphate diphosphokinase activity [GO:0004749]; 5-phosphoribose 1-diphosphate biosynthetic process [GO:0006015]; nucleoside metabolic process [GO:0009116]; nucleotide biosynthetic process [GO:0009165]; ribonucleoside monophosphate biosynthetic process [GO:0009156]	17	17	17	54,7	36,395	0	323,31	8320500000	436		0,3565	0,863004		0,247807614	0,955035491	0,057779694		0,320408079	0,771534716	0,055128479		0,063395294	0,954105096	-0,023800659		0,464319401	0,683595364	0,090753555		1,211686943	0,284701556	0,182377243	14	12	11	10	13	14	15	16	13
540	Q55856	ABC transporter	slr0615	1		integral component of membrane [GO:0016021]	ATP binding [GO:0005524]; lipid-transporting ATPase activity [GO:0034040]	integral component of membrane [GO:0016021]; ATP binding [GO:0005524]; lipid-transporting ATPase activity [GO:0034040]	5	5	5	13,3	64,292	0	15,334	324930000	66		0,0104033	0,988297		0,097958046	0,961108696	0,070146179		0,030644956	0,966562452	-0,015919876		0,08308955	0,927907819	0,042489624		0,170615612	0,814425806	-0,098971939		0,080153501	0,897977883	-0,032397842	2	3	1	2	2	1	2	2	1
541	Q55863	Pyruvate kinase 1 (PK 1) (EC 2.7.1.40)	pyk1 sll0587	1	glycolytic process [GO:0006096]	cytosol [GO:0005829]	ATP binding [GO:0005524]; kinase activity [GO:0016301]; magnesium ion binding [GO:0000287]; potassium ion binding [GO:0030955]; pyruvate kinase activity [GO:0004743]	cytosol [GO:0005829]; ATP binding [GO:0005524]; kinase activity [GO:0016301]; magnesium ion binding [GO:0000287]; potassium ion binding [GO:0030955]; pyruvate kinase activity [GO:0004743]; glycolytic process [GO:0006096]	9	9	9	29,4	53,104	0	56,807	806580000	45		0,574895	0,303834		0,644853279	1	0,915233994		0,589839162	0,321890359	0,862251663		0,576366978	0,380699187	0,838628769		0,439273392	0,452429851	0,668346405		0,706010715	0,175637631	0,993431091	0	2	1	0	0	1	1	2	1
542	Q55867	Slr0624 protein	slr0624	1			UDP-N-acetylglucosamine 2-epimerase activity [GO:0008761]	UDP-N-acetylglucosamine 2-epimerase activity [GO:0008761]	7	7	7	32,6	40,643	0	116,72	1741800000	105		0,0438946	0,995682		0,231682863	0,956830558	0,04479332		0,098875565	0,91703537	0,025318527		0,017656719	0,993056433	0,004169083		0,666359791	0,640778643	0,089896393		0,320711858	0,756955536	0,051339722	2	7	4	3	1	3	4	5	3
543	Q55868	Slr0625 protein	slr0625	1		integral component of membrane [GO:0016021]	glutamate:sodium symporter activity [GO:0015501]	integral component of membrane [GO:0016021]; glutamate:sodium symporter activity [GO:0015501]	5	5	5	13,1	52,715	0	11,368	150920000	52		0,5594	0,335691		0,04004015	0,992061789	0,036117935		0,19944866	0,720809933	0,179714203		0,700262438	0,381685072	0,42089119		0,155846912	0,807700935	-0,146878052		0,590312289	0,29270069	-0,477625275	0	3	0	1	3	1	3	2	0
544	Q55883	Sll0096 protein	sll0096	1					11	11	11	26,6	49,777	0	96,852	846960000	104		0,40618	0,657329		0,275882787	0,935212198	-0,123793793		0,849083756	0,355465313	-0,250164032		0,636493175	0,449127036	-0,279960251		0,755148206	0,386146691	-0,289222717		1,055341115	0,177996546	-0,332575607	3	5	2	4	2	3	7	3	5
545	Q55891	Phycocyanobilin:ferredoxin oxidoreductase (EC 1.3.7.5)	pcyA slr0116	1	phytochromobilin biosynthetic process [GO:0010024]		cobalt ion binding [GO:0050897]; phycocyanobilin:ferredoxin oxidoreductase activity [GO:0050620]	cobalt ion binding [GO:0050897]; phycocyanobilin:ferredoxin oxidoreductase activity [GO:0050620]; phytochromobilin biosynthetic process [GO:0010024]	5	5	5	21,4	28,129	0	86,758	926360000	64		0,380167	0,652048		0,293755971	0,928819022	-0,133393478		0,376887363	0,597518152	-0,170575714		0,201832829	0,813103321	0,084632874		0,701513083	0,422248788	-0,254290771		0,808364992	0,335058215	-0,207480621	2	3	0	1	1	3	2	2	2
546	Q55900	Septum site-determining protein MinD (Cell division inhibitor MinD)	minD sll0289	1	division septum site selection [GO:0000918]	plasma membrane [GO:0005886]	ATPase activity [GO:0016887]; ATP binding [GO:0005524]	plasma membrane [GO:0005886]; ATP binding [GO:0005524]; ATPase activity [GO:0016887]; division septum site selection [GO:0000918]	18	18	18	65	29,047	0	213,67	6921600000	356		0,14091	0,937114		0,240544159	0,939665924	0,084678268		0,553498398	0,551041475	0,138038635		0,71442754	0,520973277	0,161248016		0,468794811	0,622259091	0,127702713		0,601044022	0,470657658	0,154077148	9	11	12	7	11	11	13	12	6
547	Q55901	Probable septum site-determining protein MinC	minC sll0288	1	cell morphogenesis [GO:0000902]; division septum site selection [GO:0000918]; regulation of cell septum assembly [GO:1901891]			cell morphogenesis [GO:0000902]; division septum site selection [GO:0000918]; regulation of cell septum assembly [GO:1901891]	6	6	6	55,5	26,841	0	51,425	707700000	19		0,955433	0,1807		0,197591717	0,926028683	-0,497753906		0,177965025	0,704511628	0,470827866		0,530861107	0,403280148	0,826585007		0,69921432	0,294219718	1,224492264	+	3,13696636	0,0032	2,34129715	1	1	0	0	0	0	1	0	0
548	Q55913	Sll0283 protein	sll0283	1		integral component of membrane [GO:0016021]		integral component of membrane [GO:0016021]	2	2	2	7	47,541	0	4,9109	107650000	19		1,11449	0,246872		0,696703544	1	-0,475588989		1,767717827	0,153866667	-0,926063919		1,203156108	0,29636	-0,817682266		1,192759687	0,212779221	-0,755524445	+	1,531246489	0,034108787	-0,918011093	2	2	1	2	0	1	0	0	2
549	Q55935	Cation or drug efflux system protein	slr0794	1		integral component of membrane [GO:0016021]	cation transmembrane transporter activity [GO:0008324]	integral component of membrane [GO:0016021]; cation transmembrane transporter activity [GO:0008324]	23	23	23	31,8	113,32	0	144,36	530150000	44		0,991227	0,164889		-4,34E-08	1	0		-4,34E-08	1	0		0,635216448	0,379890063	-0,601690292		0,419458488	0,442304878	1,165685654		0,948358863	0,071989873	2,033367157	0	0	0	0	0	0	0	0	0
550	Q55971	DNA polymerase I (POL I) (EC 2.7.7.7)	polA slr0707	1	DNA-dependent DNA replication [GO:0006261]; DNA repair [GO:0006281]	cytoplasm [GO:0005737]	3'-5' exonuclease activity [GO:0008408]; 5'-3' exonuclease activity [GO:0008409]; DNA binding [GO:0003677]; DNA-directed DNA polymerase activity [GO:0003887]	cytoplasm [GO:0005737]; 3'-5' exonuclease activity [GO:0008408]; 5'-3' exonuclease activity [GO:0008409]; DNA binding [GO:0003677]; DNA-directed DNA polymerase activity [GO:0003887]; DNA repair [GO:0006281]; DNA-dependent DNA replication [GO:0006261]	15	15	15	18,2	110,29	0	59,807	844410000	106		0,434349	0,625427		0,242271109	0,934256903	0,121276474		0,161815086	0,801583916	0,081075287		0,34626837	0,636759725	-0,19653511		0,183461979	0,81133395	0,090671539		0,368291192	0,553083682	0,183279419	4	3	1	1	4	2	4	3	2
551	Q55972	Slr0708 protein	slr0708	1		integral component of membrane [GO:0016021]; outer membrane-bounded periplasmic space [GO:0030288]		integral component of membrane [GO:0016021]; outer membrane-bounded periplasmic space [GO:0030288]	12	12	12	49,8	44,68	0	264,71	4136600000	288		1,14575	0,356778		0,169992288	0,957776016	-0,063505173		0,207598829	0,771598916	-0,082803345		0,164120219	0,87052007	0,053180313		0,362124642	0,680080679	-0,117676163		1,23370259	0,092506787	-0,492414474	5	7	7	9	12	8	11	10	8
552	Q55982	4-hydroxythreonine-4-phosphate dehydrogenase (EC 1.1.1.262) (4-(phosphohydroxy)-L-threonine dehydrogenase)	pdxA sll0660	1	pyridoxal phosphate biosynthetic process [GO:0042823]; pyridoxine biosynthetic process [GO:0008615]	cytoplasm [GO:0005737]	4-hydroxythreonine-4-phosphate dehydrogenase activity [GO:0050570]; metal ion binding [GO:0046872]; NAD binding [GO:0051287]	cytoplasm [GO:0005737]; 4-hydroxythreonine-4-phosphate dehydrogenase activity [GO:0050570]; metal ion binding [GO:0046872]; NAD binding [GO:0051287]; pyridoxal phosphate biosynthetic process [GO:0042823]; pyridoxine biosynthetic process [GO:0008615]	8	8	8	36,1	37,224	0	29,949	467830000	94		0,135261	0,895953		0,168488134	0,960584615	0,051311493		0,159789419	0,811888889	0,072548294		0,554303727	0,569756219	0,151827621		0,149274688	0,878492308	-0,044041061		0,11967072	0,853227014	-0,044055176	2	4	2	2	2	2	5	3	1
553	Q55984	Sll0659 protein	sll0659	1					10	10	10	23,6	58,441	0	39,56	368600000	59		0,0982267	0,608532		0,204397104	0,929029449	0,312014389		0,671164005	0,29102008	0,681357956		0,029524858	0,96741471	0,078051376		0,512300436	0,416700491	0,563994598		0,492130618	0,338108247	0,557064438	0	1	1	1	1	1	1	1	0
554	Q57417	Acetyl-coenzyme A carboxylase carboxyl transferase subunit beta (ACCase subunit beta) (Acetyl-CoA carboxylase carboxyltransferase subunit beta) (EC 6.4.1.2)	accD zfpA sll0336	1	fatty acid biosynthetic process [GO:0006633]; malonyl-CoA biosynthetic process [GO:2001295]	acetyl-CoA carboxylase complex [GO:0009317]	acetyl-CoA carboxylase activity [GO:0003989]; ATP binding [GO:0005524]; metal ion binding [GO:0046872]	acetyl-CoA carboxylase complex [GO:0009317]; acetyl-CoA carboxylase activity [GO:0003989]; ATP binding [GO:0005524]; metal ion binding [GO:0046872]; fatty acid biosynthetic process [GO:0006633]; malonyl-CoA biosynthetic process [GO:2001295]	12	12	12	34,4	36,396	0	97,542	2194400000	143		0,0801427	0,972583		0,410900903	0,939302128	0,105772781		0,07286045	0,937820777	0,021640396		0,052824785	0,971577795	-0,014227676		0,237921729	0,830370909	0,054975891		0,308828593	0,652450233	0,104421234	3	3	5	3	6	3	5	4	4
555	Q57456	Slr0351 protein	slr0351	1	ATP metabolic process [GO:0046034]; NADH dehydrogenase complex assembly [GO:0010257]			ATP metabolic process [GO:0046034]; NADH dehydrogenase complex assembly [GO:0010257]	5	5	5	19,7	46,827	0	82,465	320100000	97		0,530593	0,503723		0,193211494	0,938458427	0,129216385		0,769740631	0,32291791	0,359439468		1,041936336	0,302796992	0,481604385		0,662280442	0,392276106	0,35303421		0,472714552	0,428447552	0,276319885	1	3	2	2	2	3	2	3	2
556	Q57473	Sll0318 protein	sll0318	1					5	5	5	36,8	24,151	0	27,654	413180000	24		0,181323	0,541792		0,126980556	0,958867005	0,149619293		0,019884614	0,970740854	-0,031360626		0,014166208	0,985084027	0,021292114		0,765619169	0,310653165	0,58841629		0,532395256	0,341774936	0,405701828	0	1	1	0	1	1	2	1	1
557	Q59975	3-phosphoshikimate 1-carboxyvinyltransferase (EC 2.5.1.19) (5-enolpyruvylshikimate-3-phosphate synthase) (EPSP synthase) (EPSPS)	aroA slr0444	1	aromatic amino acid family biosynthetic process [GO:0009073]; chorismate biosynthetic process [GO:0009423]	cytoplasm [GO:0005737]	3-phosphoshikimate 1-carboxyvinyltransferase activity [GO:0003866]	cytoplasm [GO:0005737]; 3-phosphoshikimate 1-carboxyvinyltransferase activity [GO:0003866]; aromatic amino acid family biosynthetic process [GO:0009073]; chorismate biosynthetic process [GO:0009423]	21	21	21	58,2	47,046	0	323,31	4797400000	403		0,592801	0,923564		0,822278838	0,935321321	0,078162003		1,103152547	0,472732095	0,124401093		0,79562311	0,586204878	0,108071518		0,091277496	0,945932337	0,015308762		0,031662715	0,969155689	0,00603714	10	9	8	8	14	13	16	13	9
558	Q59977	Citrate synthase (EC 2.3.3.16)	gltA sll0401	1	tricarboxylic acid cycle [GO:0006099]	cytoplasm [GO:0005737]	transferase activity, transferring acyl groups, acyl groups converted into alkyl on transfer [GO:0046912]	cytoplasm [GO:0005737]; transferase activity, transferring acyl groups, acyl groups converted into alkyl on transfer [GO:0046912]; tricarboxylic acid cycle [GO:0006099]	9	9	9	24,7	44,83	0	199,31	2232700000	258		0,465254	0,545184		0,100657413	0,962362976	0,066348267		0,765252858	0,322825279	0,361654282		0,94138885	0,337198939	0,375653839		0,246031048	0,735449799	0,132464981		0,099811194	0,847603604	0,068577576	8	8	3	8	8	9	10	9	5
559	Q59978	Protein GrpE (HSP-70 cofactor)	grpE sll0057	1	protein folding [GO:0006457]	cytoplasm [GO:0005737]	adenyl-nucleotide exchange factor activity [GO:0000774]; chaperone binding [GO:0051087]; protein homodimerization activity [GO:0042803]; unfolded protein binding [GO:0051082]	cytoplasm [GO:0005737]; adenyl-nucleotide exchange factor activity [GO:0000774]; chaperone binding [GO:0051087]; protein homodimerization activity [GO:0042803]; unfolded protein binding [GO:0051082]; protein folding [GO:0006457]	14	14	14	60,6	27,567	0	323,31	4825200000	348		0,00659526	1		0,066202124	0,990149879	-0,014458847		0,022779161	0,981883949	-0,006035614		0,075465671	0,95905004	-0,017780685		0,270185608	0,834553652	-0,047587204		0,161932779	0,853530945	-0,033268356	9	9	11	10	11	9	11	11	13
560	Q59993	ATP-dependent Clp protease proteolytic subunit 2 (EC 3.4.21.92) (Endopeptidase Clp 2)	clpP2 sll0534	1		cytoplasm [GO:0005737]	serine-type endopeptidase activity [GO:0004252]	cytoplasm [GO:0005737]; serine-type endopeptidase activity [GO:0004252]	3	2	2	17,7	24,823	0	23,755	1320900000	60		0,463476	0,529142		0,321242455	0,932854599	-0,17071991		0,860209452	0,291105691	-0,362514496		0,789767653	0,364135135	-0,398731613		0,681547362	0,40908291	-0,294919968		0,061508551	0,913591264	-0,030605316	2	2	2	1	2	2	2	1	2
561	Q59996;P73666	Probable RNA polymerase sigma-C factor	sigC sll0184	2	DNA-templated transcription, initiation [GO:0006352]		DNA binding [GO:0003677]; DNA binding transcription factor activity [GO:0003700]; sigma factor activity [GO:0016987]	DNA binding [GO:0003677]; DNA binding transcription factor activity [GO:0003700]; sigma factor activity [GO:0016987]; DNA-templated transcription, initiation [GO:0006352]	8	8	8	19,3	46,581	0	13,191	442310000	21		0,55369	0,408713		1,028772041	1	-0,645280457		0,86672342	0,248778589	-0,522928238		0,57531661	0,411651865	-0,486707687		0,641179064	0,370686456	-0,451369095		0,815292022	0,180527397	-0,533165359	2	2	1	2	0	0	0	1	0
562	Q6YRP4	Slr6110 protein	slr6110	1	phosphorelay signal transduction system [GO:0000160]	intracellular [GO:0005622]		intracellular [GO:0005622]; phosphorelay signal transduction system [GO:0000160]	6	6	6	15,9	45,331	0	9,8904	330320000	58		0,0170119	0,985145		0,284357769	0,928912189	0,136472702		0,126760869	0,843707809	0,061223984		0,262875767	0,739389899	0,129004288		0,023197595	0,9756822	0,017576599		0,092259761	0,866095392	0,053136444	2	1	1	0	1	1	3	3	2
563	Q6YRQ2	Type I restriction enzyme R Protein (EC 3.1.21.3)	slr6102	1	DNA restriction-modification system [GO:0009307]		ATP binding [GO:0005524]; DNA binding [GO:0003677]; Type I site-specific deoxyribonuclease activity [GO:0009035]	ATP binding [GO:0005524]; DNA binding [GO:0003677]; Type I site-specific deoxyribonuclease activity [GO:0009035]; DNA restriction-modification system [GO:0009307]	4	4	4	7,8	121,94	0,0005534	3,0472	830440000	24		0,946664	0,198667		0,863055063	1	1,457447815		0,890996277	0,176107692	1,510671616		0,107934436	0,84569395	-0,356148529		0,680162443	0,302198391	1,212109756		0,2969123	0,508457018	0,70331459	1	0	1	0	0	1	1	0	1
564	Q6YRQ7	Type I site-specific deoxyribonuclease	slr6097	1	DNA modification [GO:0006304]		DNA binding [GO:0003677]	DNA binding [GO:0003677]; DNA modification [GO:0006304]	2	2	2	7,4	44,711	0	30,755	115260000	42		0,618419	0,293338		0,721554756	1	-0,863890076		0,710468134	0,375003215	-0,285599136		0,26130108	0,681839479	0,257776642		0,46721549	0,511203252	-0,280690765		0,133715258	0,819191953	-0,067070389	1	2	1	1	2	1	2	2	1
565	Q6YRQ9	Slr6095 protein	slr6095	1	DNA methylation [GO:0006306]		DNA binding [GO:0003677]; N-methyltransferase activity [GO:0008170]	DNA binding [GO:0003677]; N-methyltransferase activity [GO:0008170]; DNA methylation [GO:0006306]	9	9	9	27,3	53,532	0	68,311	498720000	67		1,02425	0,382522		0,05099739	0,989566502	-0,029279327		1,408106622	0,171394958	-0,427335739		1,249015947	0,292388889	-0,425771332		0,40107349	0,607889401	-0,168544769		0,386132663	0,563012346	-0,15512619	3	2	1	1	1	2	2	1	3
566	Q6YRR1	ParA family chromosome partitioning protein	sll6093	1					5	5	5	25,8	21,648	0	18,24	276000000	34		0,642641	0,612896		0,667683683	1	-0,168362427		1,238027677	0,226404432	-0,337934494		0,48011043	0,603482353	-0,14665451		0,835352688	0,443848255	-0,182791138		1,11816132	0,17145359	-0,3185112	2	1	0	1	0	1	1	1	1
567	Q6YRS8;P73838	Sll6017 protein (Sll6076 protein)	sll6017 sll6076	2					6	6	2	37,5	29,211	0	9,2123	275770000	32		0,460988	0,303553		0,455288813	1	-0,433039856		0,154646996	0,796539683	0,098031235		0,286206822	0,621738123	-0,425555801		0,689616702	0,312600985	-0,825096512	+	1,478802177	0,034033613	-1,02872963	1	2	1	2	0	1	3	1	2
568	Q6YRT3	Slr6012 protein (Slr6071 protein)	slr6012 slr6071	1		integral component of membrane [GO:0016021]	ATPase activity [GO:0016887]; ATP binding [GO:0005524]	integral component of membrane [GO:0016021]; ATP binding [GO:0005524]; ATPase activity [GO:0016887]	25	25	25	36,6	84,206	0	277,6	1903700000	259		0,100046	0,723566		0,070508895	0,965517842	0,085636902		0,173821789	0,754446312	-0,170299911		0,38691377	0,544858257	-0,358356094		0,030547419	0,958681115	-0,039832306		0,011242393	0,976771407	0,012328339	16	6	8	6	6	7	17	6	4
569	Q6YRW7;Q6ZEM6	Arsenate reductase ArsI2 (EC 1.20.4.1)	arsI2 slr6037	2			arsenate reductase (glutaredoxin) activity [GO:0008794]	arsenate reductase (glutaredoxin) activity [GO:0008794]	4	4	4	45,7	15,558	0	42,517	157410000	57		0,295135	0,363584		0,666303565	1	0,742817688		0,632435159	0,291307536	0,934987259		1,039211054	0,293702128	0,982645798		0,183082637	0,756832845	0,213376617		0,276404595	0,554571132	0,419698715	0	4	1	1	1	1	4	2	0
570	Q6ZEM5;Q6YRW8	Plasmid partitioning protein	slr5105	2					5	5	5	19,9	21,729	0	12,724	301320000	37		0,020365	0,894449		0,051182682	0,977395973	-0,080651855		0,161912997	0,768941606	-0,151563263		0,096330567	0,896837209	-0,095332336		0,110673669	0,867753899	0,091637421		0,243241291	0,621905123	0,213703156	2	2	1	1	1	1	3	0	1
571	Q6ZE62	Slr8030 protein	slr8030	1					4	4	4	11,2	78,676	0	4,7894	149940000	26		1,10648	0,249354		0,099523878	0,957316224	-0,083392715		0,701229017	0,299786561	-0,539890289		0,721755529	0,36531236	-0,489594269		0,297074255	0,678010627	0,160303116		0,473955423	0,438717416	0,254698181	0	0	1	0	1	1	1	1	0
572	Q6ZE91	Sll8001 protein	sll8001	1					3	3	3	5,2	39,628	0,0090634	1,4457	51048000	13		0,849396	0,248557		0,604590472	1	-0,475324631		1,301323183	0,151733333	-1,109114075		0,638373856	0,386324111	-0,497578049		1,514015752	0,231849057	-0,890597916		1,056939703	0,089574074	-0,738041687	0	2	0	0	0	2	0	1	0
573	Q6ZEH4	Slr7024 protein	slr7024	1					15	15	15	33,2	67,418	0	67,989	1224900000	140		0,416623	0,486407		0,085467416	0,962067979	-0,083332443		0,925791725	0,248039801	-0,461529541		0,542568124	0,460916272	-0,353142929		0,444368315	0,515725955	-0,2881073		1,070267635	0,113777778	-0,518673706	5	7	4	4	3	5	11	7	3
574	Q6ZER4	Sll5066 protein	sll5066	1					3	3	3	16,7	22,544	0	17,278	235660000	36		0,0567073	0,722349		0,1201276	0,958718719	-0,151797104		0,163410747	0,771564033	0,137940979		0,368003113	0,538460317	-0,491413879		0,127251146	0,829020966	-0,188040543		0,272438721	0,575480885	-0,29970932	1	2	2	2	2	2	1	1	1
575	Q6ZES1	Two-component response regulator	sll5059	1	phosphorelay signal transduction system [GO:0000160]	intracellular [GO:0005622]		intracellular [GO:0005622]; phosphorelay signal transduction system [GO:0000160]	6	6	6	23,2	33,416	0	88,595	373200000	90		0,367796	0,722444		1,054460054	1	-0,287086105		0,448131676	0,581550282	-0,150859833		0,738913638	0,455313002	-0,217937851		1,023410528	0,329762864	-0,277801895		1,172521058	0,217570093	-0,238637924	2	4	2	3	3	2	3	2	1
576	Q79EE4	ATP-binding subunit of an ABC-type osmolyte transporter	ggtA	1	transport [GO:0006810]	ATP-binding cassette (ABC) transporter complex [GO:0043190]	ATPase activity [GO:0016887]; ATP binding [GO:0005524]; transporter activity [GO:0005215]	ATP-binding cassette (ABC) transporter complex [GO:0043190]; ATP binding [GO:0005524]; ATPase activity [GO:0016887]; transporter activity [GO:0005215]; transport [GO:0006810]	4	4	4	13,2	40,755	0	6,6305	299570000	25		0,765228	0,220384		0,923480027	1	-1,303982544		0,269184687	0,615411386	-0,336010742		0,029506946	0,972730109	0,038410187		0,737842479	0,293823362	-0,918506622		0,795845247	0,128665392	-1,121705246	1	1	1	2	1	0	1	1	0
577	Q79EF9	Mn transporter MntC	mntC	1	cell adhesion [GO:0007155]; metal ion transport [GO:0030001]		metal ion binding [GO:0046872]	metal ion binding [GO:0046872]; cell adhesion [GO:0007155]; metal ion transport [GO:0030001]	6	6	6	23,6	36,075	0	95,143	274390000	63	+	4,71776	0,008		0,183055739	0,93975286	-0,168004608	+	3,236948514	0,044	-2,411878586		1,587491438	0,414666667	-1,411080551		1,556524297	0,241677419	-1,205623245	+	4,03378148	0	-2,85318718	5	4	3	4	4	6	4	5	3
[truncated: 70 more columns]
