# Supplementary material for: Quantitative insights into the cyanobacterial cell economy
Source: eLife journal article supplement (doi:10.7554/elife.42508), 2019-02-04
Supplement: supp [file elife-42508-supp-v1.zip]

Table 1. List of antibodies used in this study.

| Antibody                                                     | Agrisera catalogue number | Dilution | Protein apparent MW |
|--------------------------------------------------------------|---------------------------|----------|---------------------|
| Rabbit Anti-Rbcl (Rubisco large subunit, form I and form II) | AS03 037                  | 1:5000   | 52.5 kDa            |
| Rabbit Anti-PsaC (PSI-C core subunit of photosystem I)       | AS10 939                  | 1:1000   | 9 kDa               |
| Rabbit Anti-PsbA (D1 protein of PSII, C-terminal)            | AS05 084                  | 1:10000  | 28-30 kDa           |
| Rabbit Anti-S1 (30S ribosomal protein S1)                    | AS08 309                  | 1:2000   | 35 kDa              |
| Rabbit Anti-L1 (50S ribosomal protein L1)                    | AS11 1738                 | 1:1000   | 25 kDa              |

Table 2. List of protein standards used in this study.

| Standard                                            | Agrisera catalogue number | Protein apparent MW | Concentrations        |
|-----------------------------------------------------|---------------------------|---------------------|-----------------------|
| Purified spinach Rbcl                               | AS01 017S                 | 52.7 kDa            | 0.375, 0.75, 1.5 pmol |
| Recombinant PsaC from <i>Synechocystis</i> PCC 6803 | AS04 042S                 | 11.5 kDa            | 0.075, 0.3, 0.6 pmol  |
| Recombinant PsbA from <i>Synechocystis</i> PCC 6803 | AS01 016S                 | 41.5 kDa            | 0.125, 0.5, 1 pmol    |

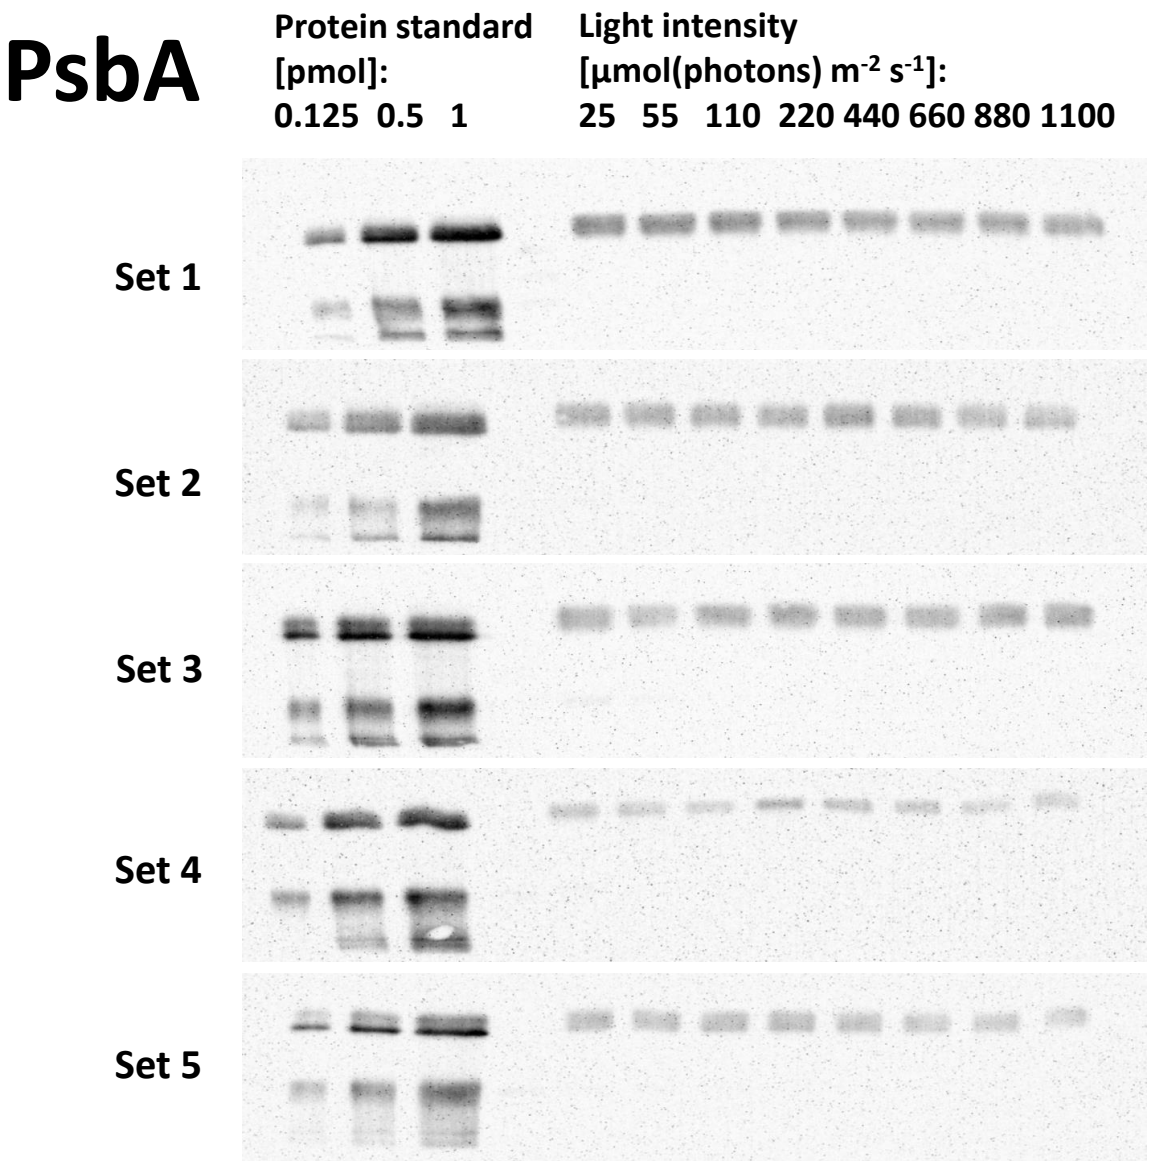

A. Results of immunoblotting analysis for PsbA protein.

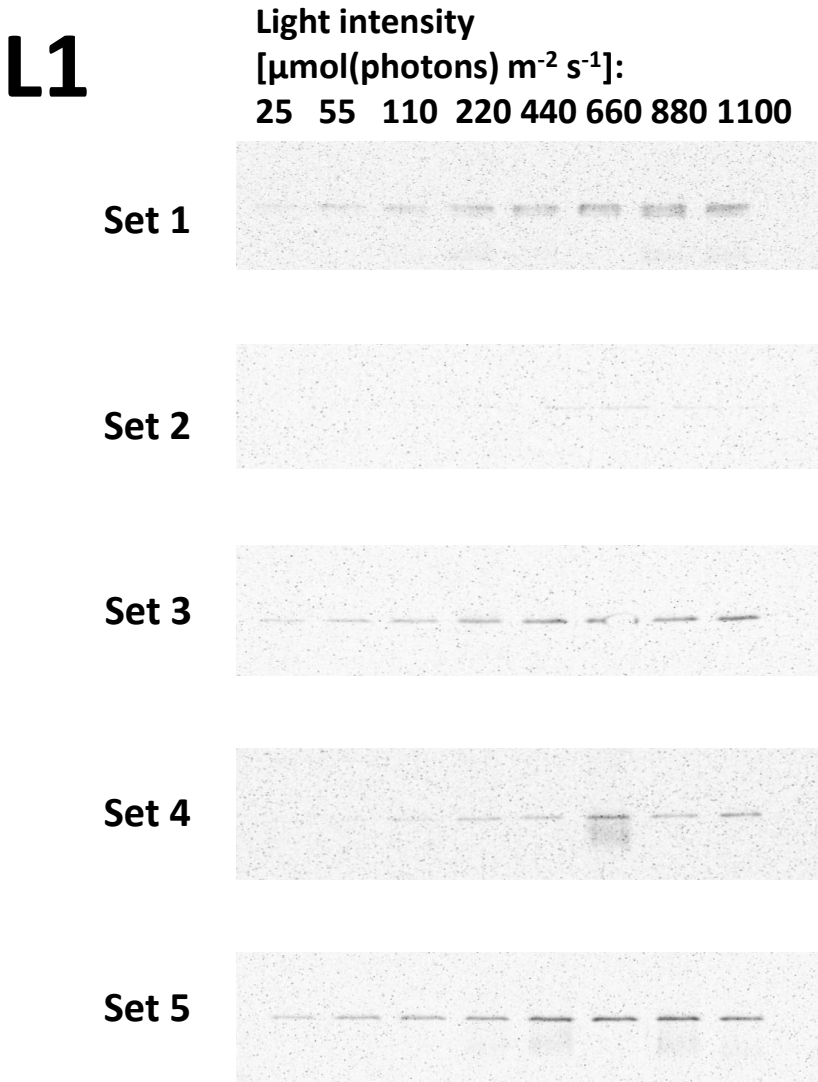

D. Results of immunoblotting analysis for L1 protein.

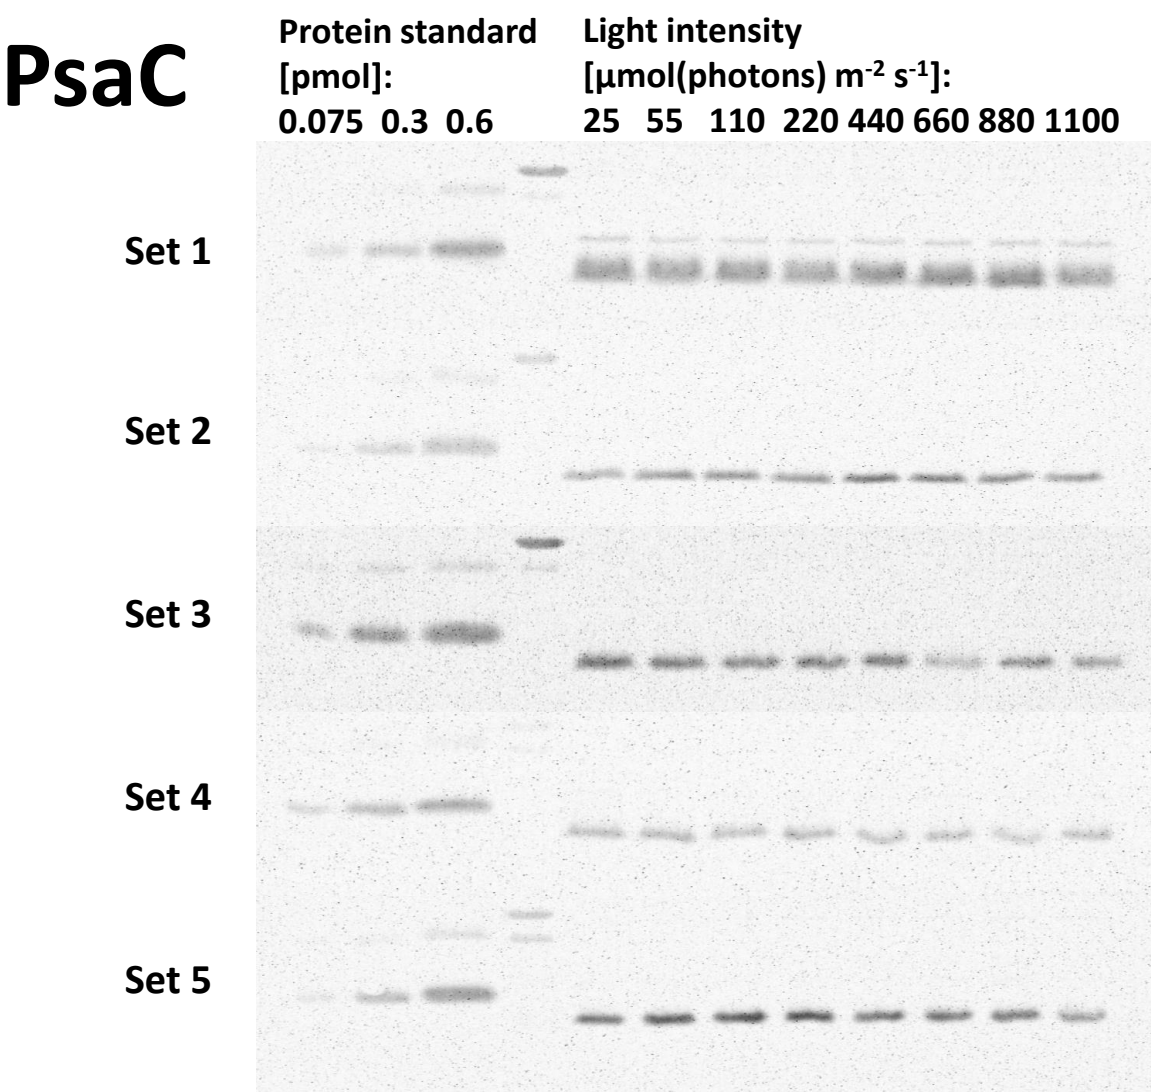

B. Results of immunoblotting analysis for PsaC protein.

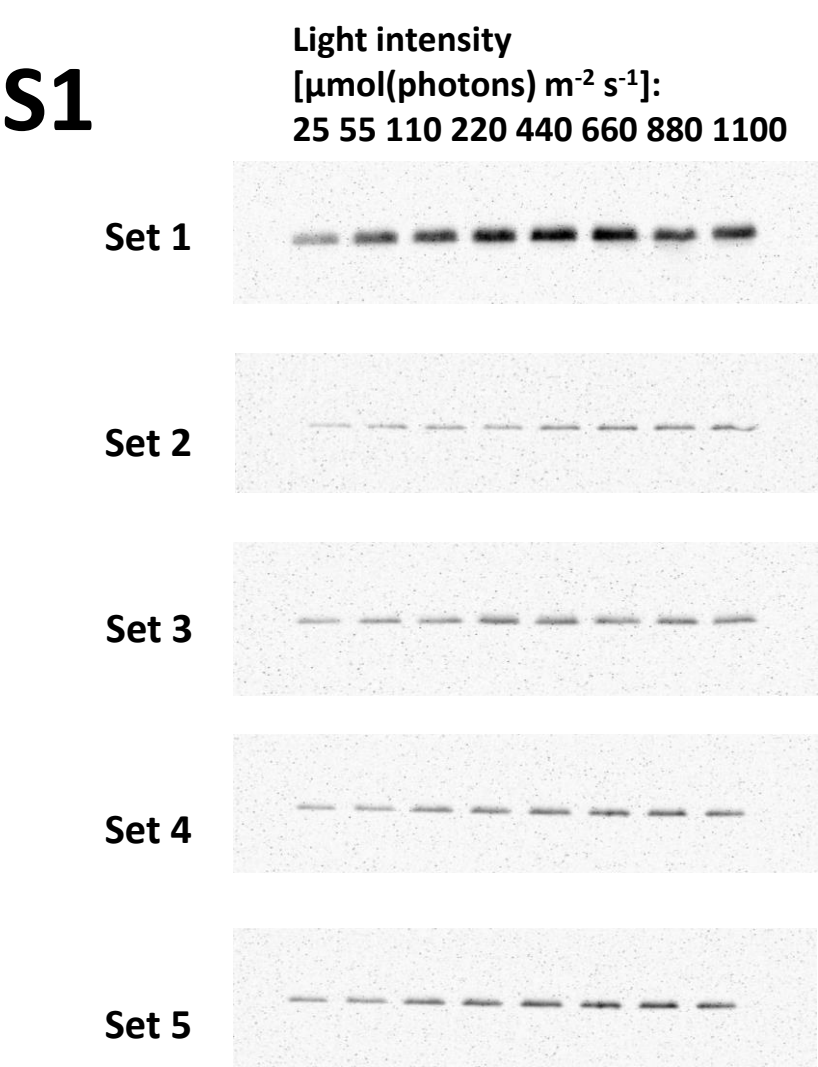

E. Results of immunoblotting analysis for S1 protein.

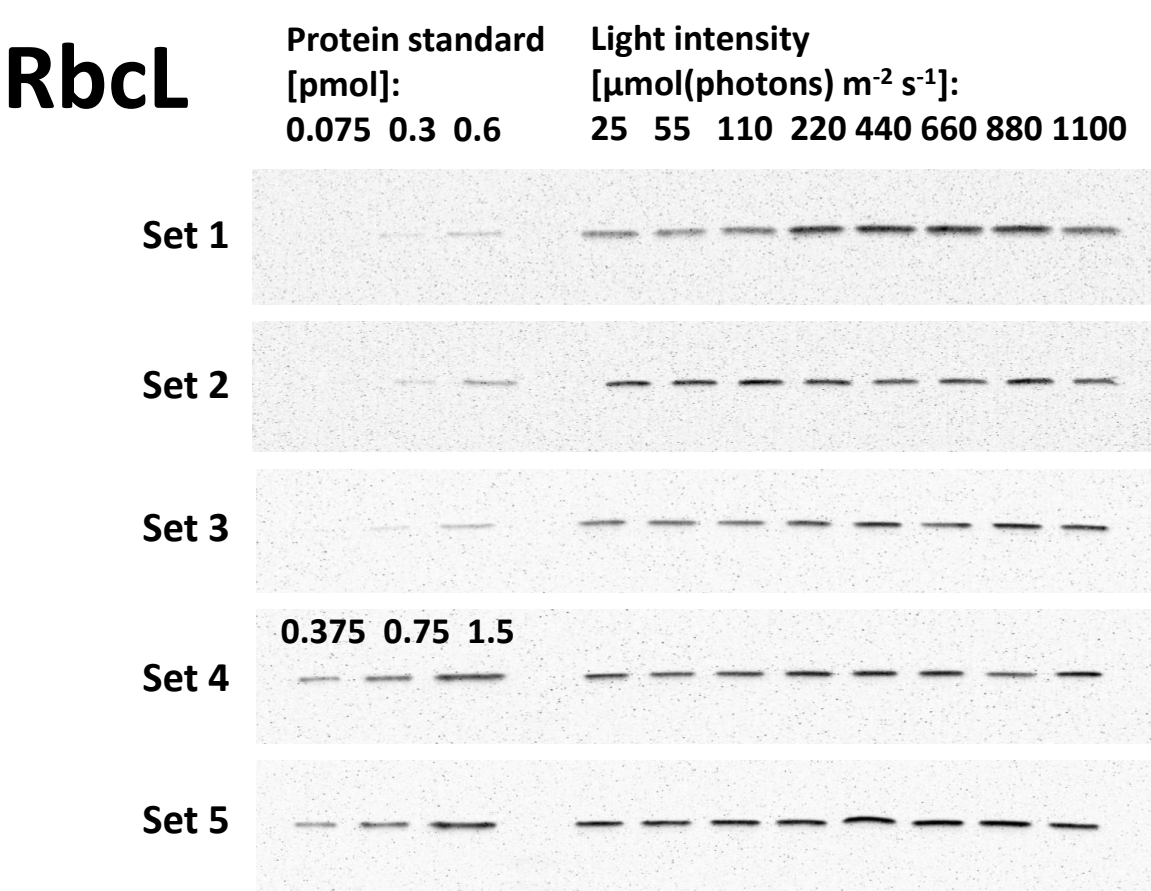

C. Results of immunoblotting analysis for Rbcl protein.
