# Supplementary material for: Quantitative insights into the cyanobacterial cell economy
Source: eLife journal article supplement (doi:10.7554/elife.42508), 2019-02-04
Supplement: supp [file elife-42508-supp-v1.zip]

# SMALL-SCALE PROTEOME ALLOCATION MODEL FOR PHOTOTROPHIC GROWTH

| parameter             | definition                                                                 | value                                                                | source     |
|-----------------------|----------------------------------------------------------------------------|----------------------------------------------------------------------|------------|
| $P_m$                 | cell membrane permeability to inorganic carbon                             | $0.108 \text{ [ dm h}^{-1} \text{]}$                                 | (2)        |
| $A_{\text{cell}}$     | cell surface area                                                          | $1.26 \cdot 10^{-9} \text{ [ dm}^2 \text{ cell}^{-1} \text{]}$       | This study |
| $V_{\text{cell}}$     | cell volume                                                                | $4.19 \cdot 10^{-15} \text{ [ dm}^3 \text{ cell}^{-1} \text{]}$      | This study |
| $N_A$                 | Avogadro constant                                                          | $6.022 \cdot 10^{23} \text{ [ mol}^{-1} \text{]}$                    |            |
| $k_{\text{cat}}^t$    | maximal import rate                                                        | $43560 \text{ [ h}^{-1} \text{]}$                                    | (3)        |
| $K_t$                 | half-saturation constant of the transporter enzyme                         | $15 \text{ [ }\mu\text{M} \text{]}$                                  | (4)        |
| $k_{\text{cat}}^m$    | maximal metabolic rate                                                     | $32700 \text{ [ h}^{-1} \text{]}$                                    | (5)        |
| $K_m$                 | half-saturation constant of the metabolic enzyme                           | $2441560 \text{ [ molecules cell}^{-1} \text{]}$                     | (5)        |
| $\gamma_{\text{max}}$ | maximal translation rate                                                   | $79200 \text{ [ aa h}^{-1} \text{ molecules}^{-1} \text{]}$          | (6)        |
| $K_a, K_e$            | half-saturation constant of amino acids and energy units for each reaction | $10000 \text{ [ molecules cell}^{-1} \text{]}$                       | (1)        |
| $d_p$                 | protein half-life                                                          | $1/23 \text{ [ h}^{-1} \text{]}$                                     | (7)        |
| $\sigma$              | effective absorption cross-section of the photosynthetic unit              | $0.7 \text{ [ nm}^2 \text{]}$                                        | This study |
| $\tau$                | maximal turnover rate of the photosynthetic unit                           | $270000 \text{ [ h}^{-1} \text{]}$                                   | This study |
| $k_d$                 | rate constant for photodamage                                              | $10^{-6}$                                                            | This study |
| $m_v$                 | energy maintenance rate                                                    | $7 \cdot 10^9 \text{ [ molecules cell}^{-1} \text{ h}^{-1} \text{]}$ | (8)        |
| $D_c$                 | average cell density (protein mass per cell)                               | $1.4 \cdot 10^{10} \text{ [ aa cell}^{-1} \text{]}$                  | (1)        |
| $n_R$                 | ribosome length                                                            | $7358 \text{ [ aa molecule}^{-1} \text{]}$                           | (1)        |
| $n_Q$                 | average protein length for house-keeping proteins                          | $300 \text{ [ aa molecule}^{-1} \text{]}$                            | This study |
| $n_P$                 | length of one photosynthetic unit                                          | $95451 \text{ [ aa molecule}^{-1} \text{]}$                          | (1)        |
| $n_T$                 | transporter length                                                         | $1681 \text{ [ aa molecule}^{-1} \text{]}$                           | (1)        |
| $n_M$                 | length of one metabolic enzyme complex                                     | $28630 \text{ [ aa molecule}^{-1} \text{]}$                          | (1)        |
| $m_a$                 | amount of energy units consumed to create one amino acid                   | 45                                                                   | (1)        |
| $m_c$                 | average carbon chain length of an amino acid                               | 5                                                                    | (1)        |
| $m_\gamma$            | amount of energy units needed for one translational elongation step        | 3                                                                    | (1)        |
| $m_\Phi$              | amount of energy units produced during photosynthesis                      | 8                                                                    | (1)        |

| Proteome Allocation Problem                                                                                                                                                                                                                                                                                                                                         | ODE System                                                                                                                                                                                                                                                                                                                                                                                                                                                                                                                                                                          | Reaction Rates                                                                                                                                                                                                                                                                                                                                                                                                                                                                                                                                                                                                                                                     |
|---------------------------------------------------------------------------------------------------------------------------------------------------------------------------------------------------------------------------------------------------------------------------------------------------------------------------------------------------------------------|-------------------------------------------------------------------------------------------------------------------------------------------------------------------------------------------------------------------------------------------------------------------------------------------------------------------------------------------------------------------------------------------------------------------------------------------------------------------------------------------------------------------------------------------------------------------------------------|--------------------------------------------------------------------------------------------------------------------------------------------------------------------------------------------------------------------------------------------------------------------------------------------------------------------------------------------------------------------------------------------------------------------------------------------------------------------------------------------------------------------------------------------------------------------------------------------------------------------------------------------------------------------|
| $\begin{aligned} \beta, X, \mu \\ s.t. \quad \frac{d[X]}{dt} - \mu \cdot X = 0, \\ \sum_j \beta_j = 1, \quad \forall j \in \mathbb{E}: \beta_j \geq 0, \\ \sum_j n_j \cdot [j] + [a a] + \frac{[c_i]}{m_c} = D_c, \\ n_Q \cdot [Q] = 0.5 \cdot D_c, \\ \mathbb{E} = \{R, Q, P, T, M\}, \\ X = [c i, a a, e, Q, P^o, P^*, T, M, R]^T \in \mathbb{R}_+ \end{aligned}$ | $\begin{aligned} \frac{d[c_i]}{dt} &= v_d + v_t - m_c \cdot v_m, \\ \frac{d[a a]}{dt} &= v_m + n_P \cdot v_i - \sum_j n_j \cdot \gamma_j + d_p \cdot \sum_j n_j \cdot [j], \\ \frac{d[z]}{dt} &= \gamma_z - d_p \cdot [z], \\ \frac{d[P^o]}{dt} &= \gamma_P - v_1 + v_2 - d_p \cdot [P^o], \\ \frac{d[P^*]}{dt} &= v_1 - v_2 - v_i - d_p \cdot [P^*], \\ \frac{d[e]}{dt} &= m_\Phi \cdot v_2 - v_t - m_\mu \cdot v_m - m_\gamma \cdot \sum_j n_j \cdot \gamma_j - \frac{m_v \cdot [e]}{10 + [e]}, \\ \forall j \in \mathbb{E}, \forall z \in \mathbb{E} \setminus P. \end{aligned}$ | $\begin{aligned} v_d &= P_m \cdot \frac{A_{\text{cell}}}{V_{\text{cell}}} \cdot (N_A \cdot V_{\text{cell}} \cdot [c_i^x] - [c_i]), \\ v_t &= [T] \cdot k_{\text{cat}}^t \cdot \frac{[c_i^x]}{K_t + [c_i^x]} \cdot \frac{[e]}{K_e + [e]}, \\ v_m &= [M] \cdot k_{\text{cat}}^m \cdot \frac{[c_i]}{K_m + [c_i]} \cdot \frac{[e]}{K_e + [e]}, \\ \gamma_j &= [R] \cdot \beta_j \cdot \frac{\gamma_{\text{max}}}{n_j} \cdot \frac{[a a]}{K_a + [a a]} \cdot \frac{[e]}{K_e + [e]}, \\ v_1 &= \sigma \cdot \text{light} \cdot [P^o], \\ v_2 &= \tau \cdot [P^*], \\ v_i &= k_d \cdot \sigma \cdot \text{light} \cdot [P^*], \\ \forall j \in \mathbb{E}. \end{aligned}$ |

## REFERENCES

- Faizi M, Zavrel T, Loureiro C, Cervený J, Steuer R (2018). A model of optimal protein allocation during phototrophic growth. *Biosystems* 166: 26-36.
- Mangan NM, Brenner MP (2014). Systems analysis of the CO2 concentrating mechanism in cyanobacteria. *eLife* 3: p. e02043.
- Dornmair K, Overath P, Jähnig F (1989). Fast measurement of galactoside transport by lactose permease. *J Biol Chem* 26(1): 342-346.
- Omata T, Takahashi Y, Yamaguchi O, Nishimura T (2002). Structure, function and regulation of the cyanobacterial high-affinity bicarbonate transporter, BCT1. *Funct Plant Biol* 29(3): 151-159.
- Marcus Y, Altman-Gueta H, Finkler A, Gurevitz M (2005). Mutagenesis at two distinct phosphate-binding sites unravels their differential roles in regulation of Rubisco activation and catalysis. *J Bacteriol* 187 (12): 222-4228.
- Bremer H, Dennis P (2008). Modulation of chemical composition and other parameters of the cell at Different Exponential Growth Rates. *EcoSal Plus*, 3(1).
- Maier T, Schmidt A, Güell M, Kühner S, Gavin AC, Aebersold R, Serrano L (2011). Quantification of mRNA and protein and integration with protein turnover in a bacterium. *Mol Syst Biol* 7: 511.
- Knoop H, Gründel M, Zilliges Y, Lehmann R, Hoffmann S, Lockau W, Steuer R (2013). Flux balance analysis of cyanobacterial metabolism: the metabolic network of *Synechocystis* sp. PCC 6803. *PLoS Comput Biol* 9(6): e1003081.
