# Supplementary material for: Quantitative insights into the cyanobacterial cell economy
Source: eLife journal article supplement (doi:10.7554/elife.42508), 2019-02-04

**A** Constant ribosomal (R) mass fraction of 4 %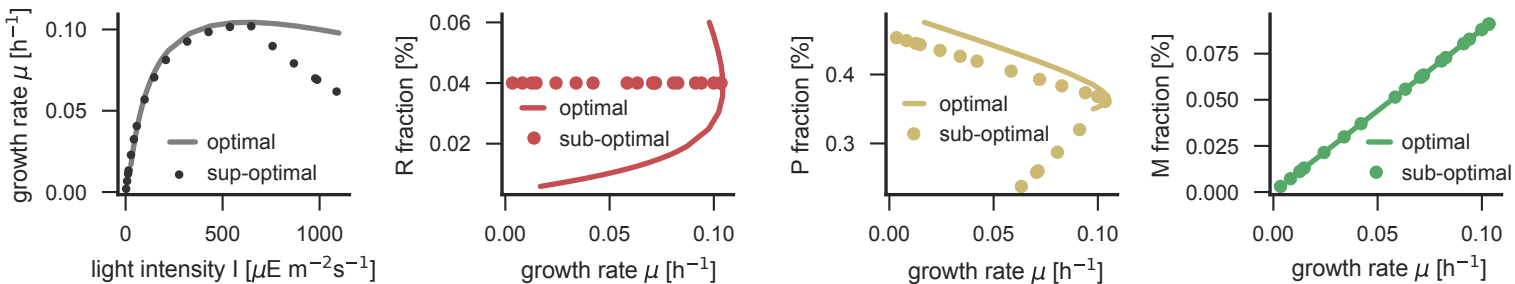**B** Constant photosynthetic unit (P) mass fraction of 36 %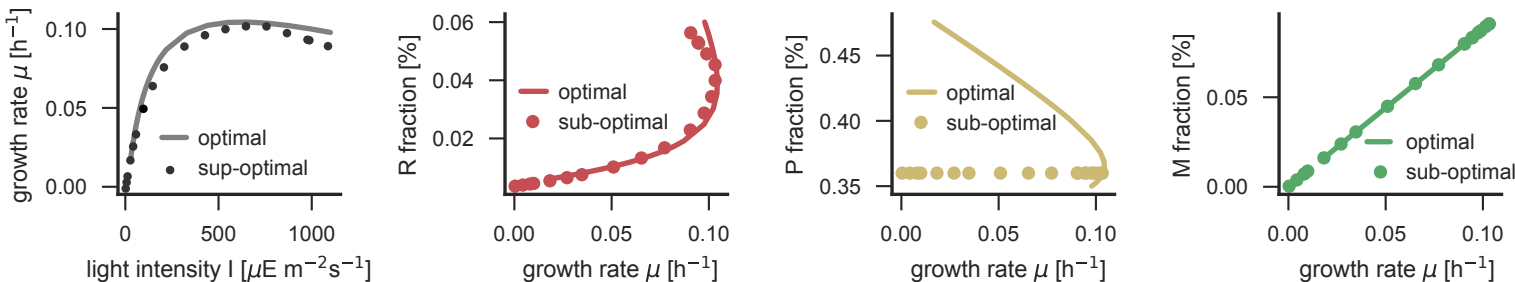**C** Constant metabolic enzyme (M) mass fraction of 9.2 %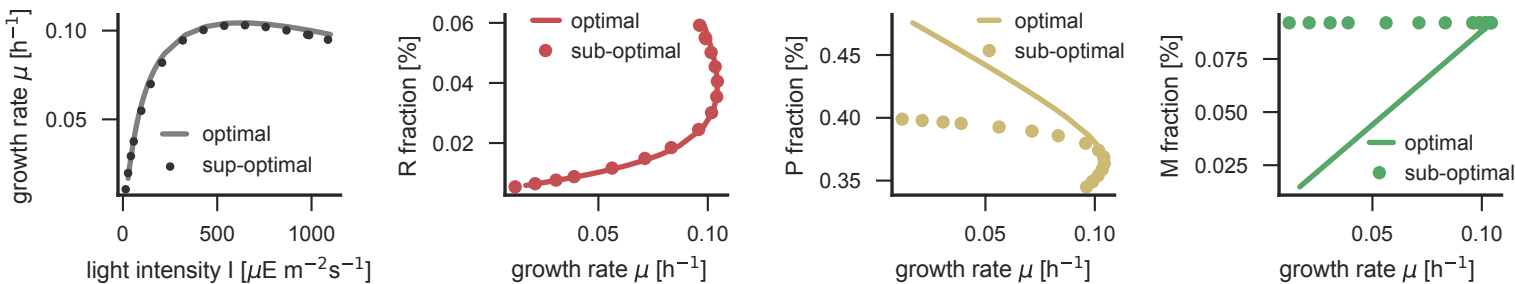

Supplement: supp [file elife-42508-supp-v1.zip]
