# Supplementary material for: Quantitative insights into the cyanobacterial cell economy
Source: eLife journal article supplement (doi:10.7554/elife.42508), 2019-02-04

Proteomaps level 2: cellular processes

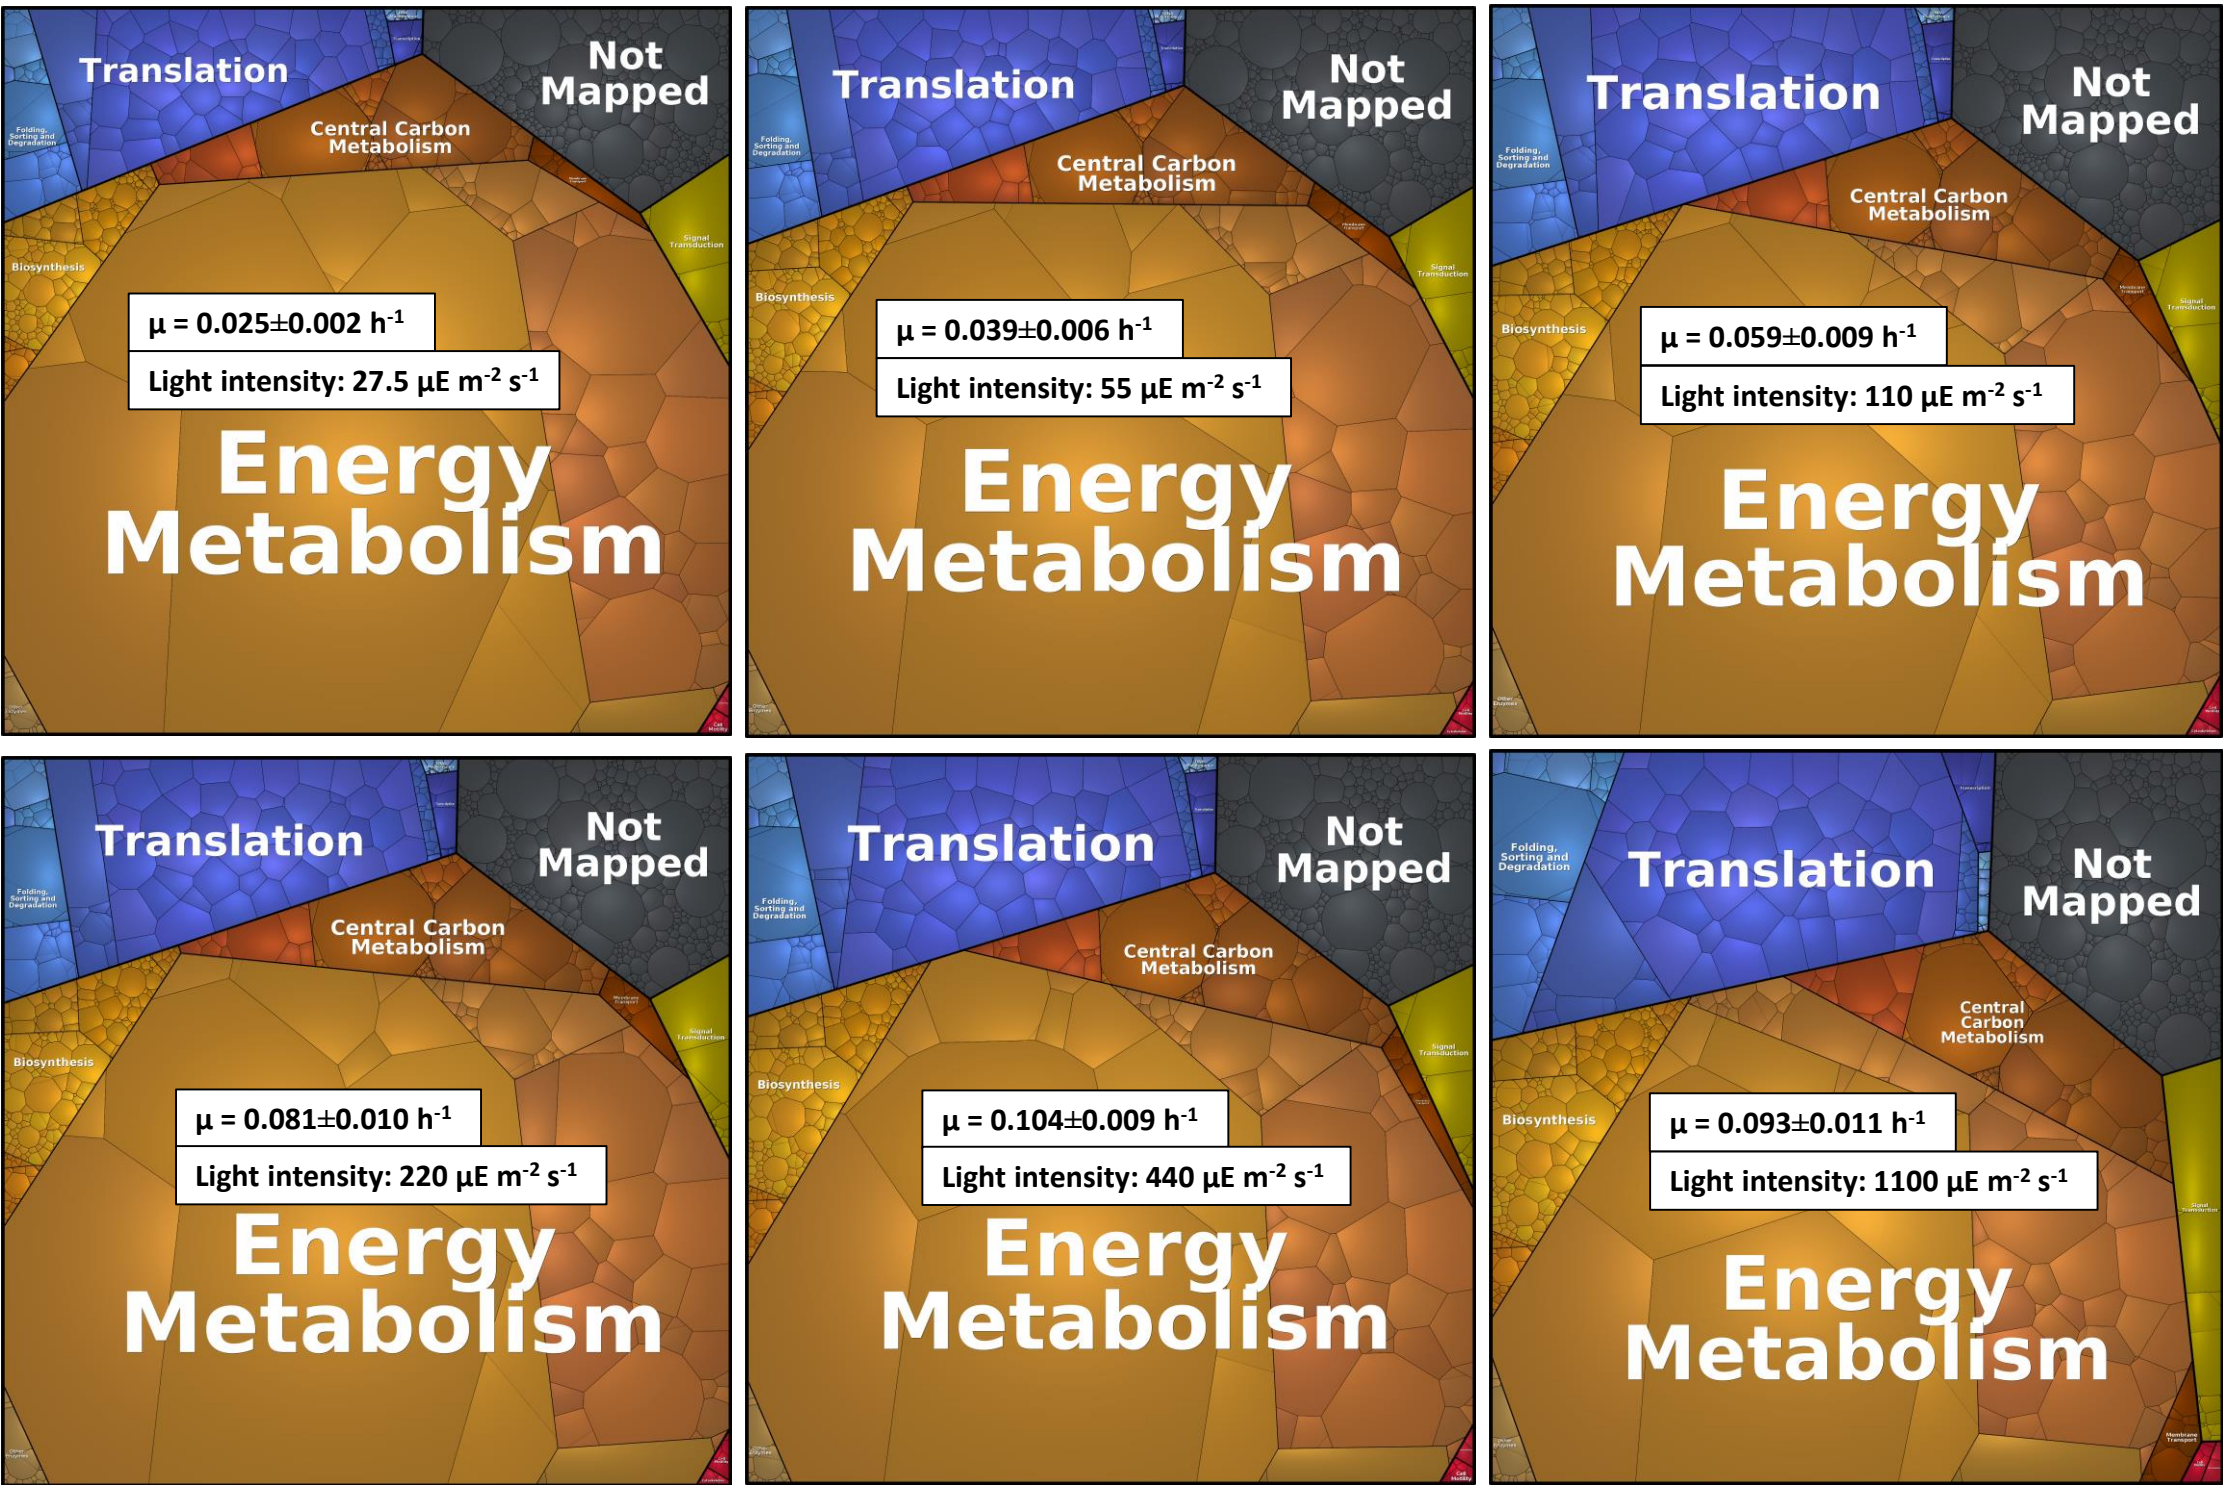

Proteomaps level 3: cellular processes

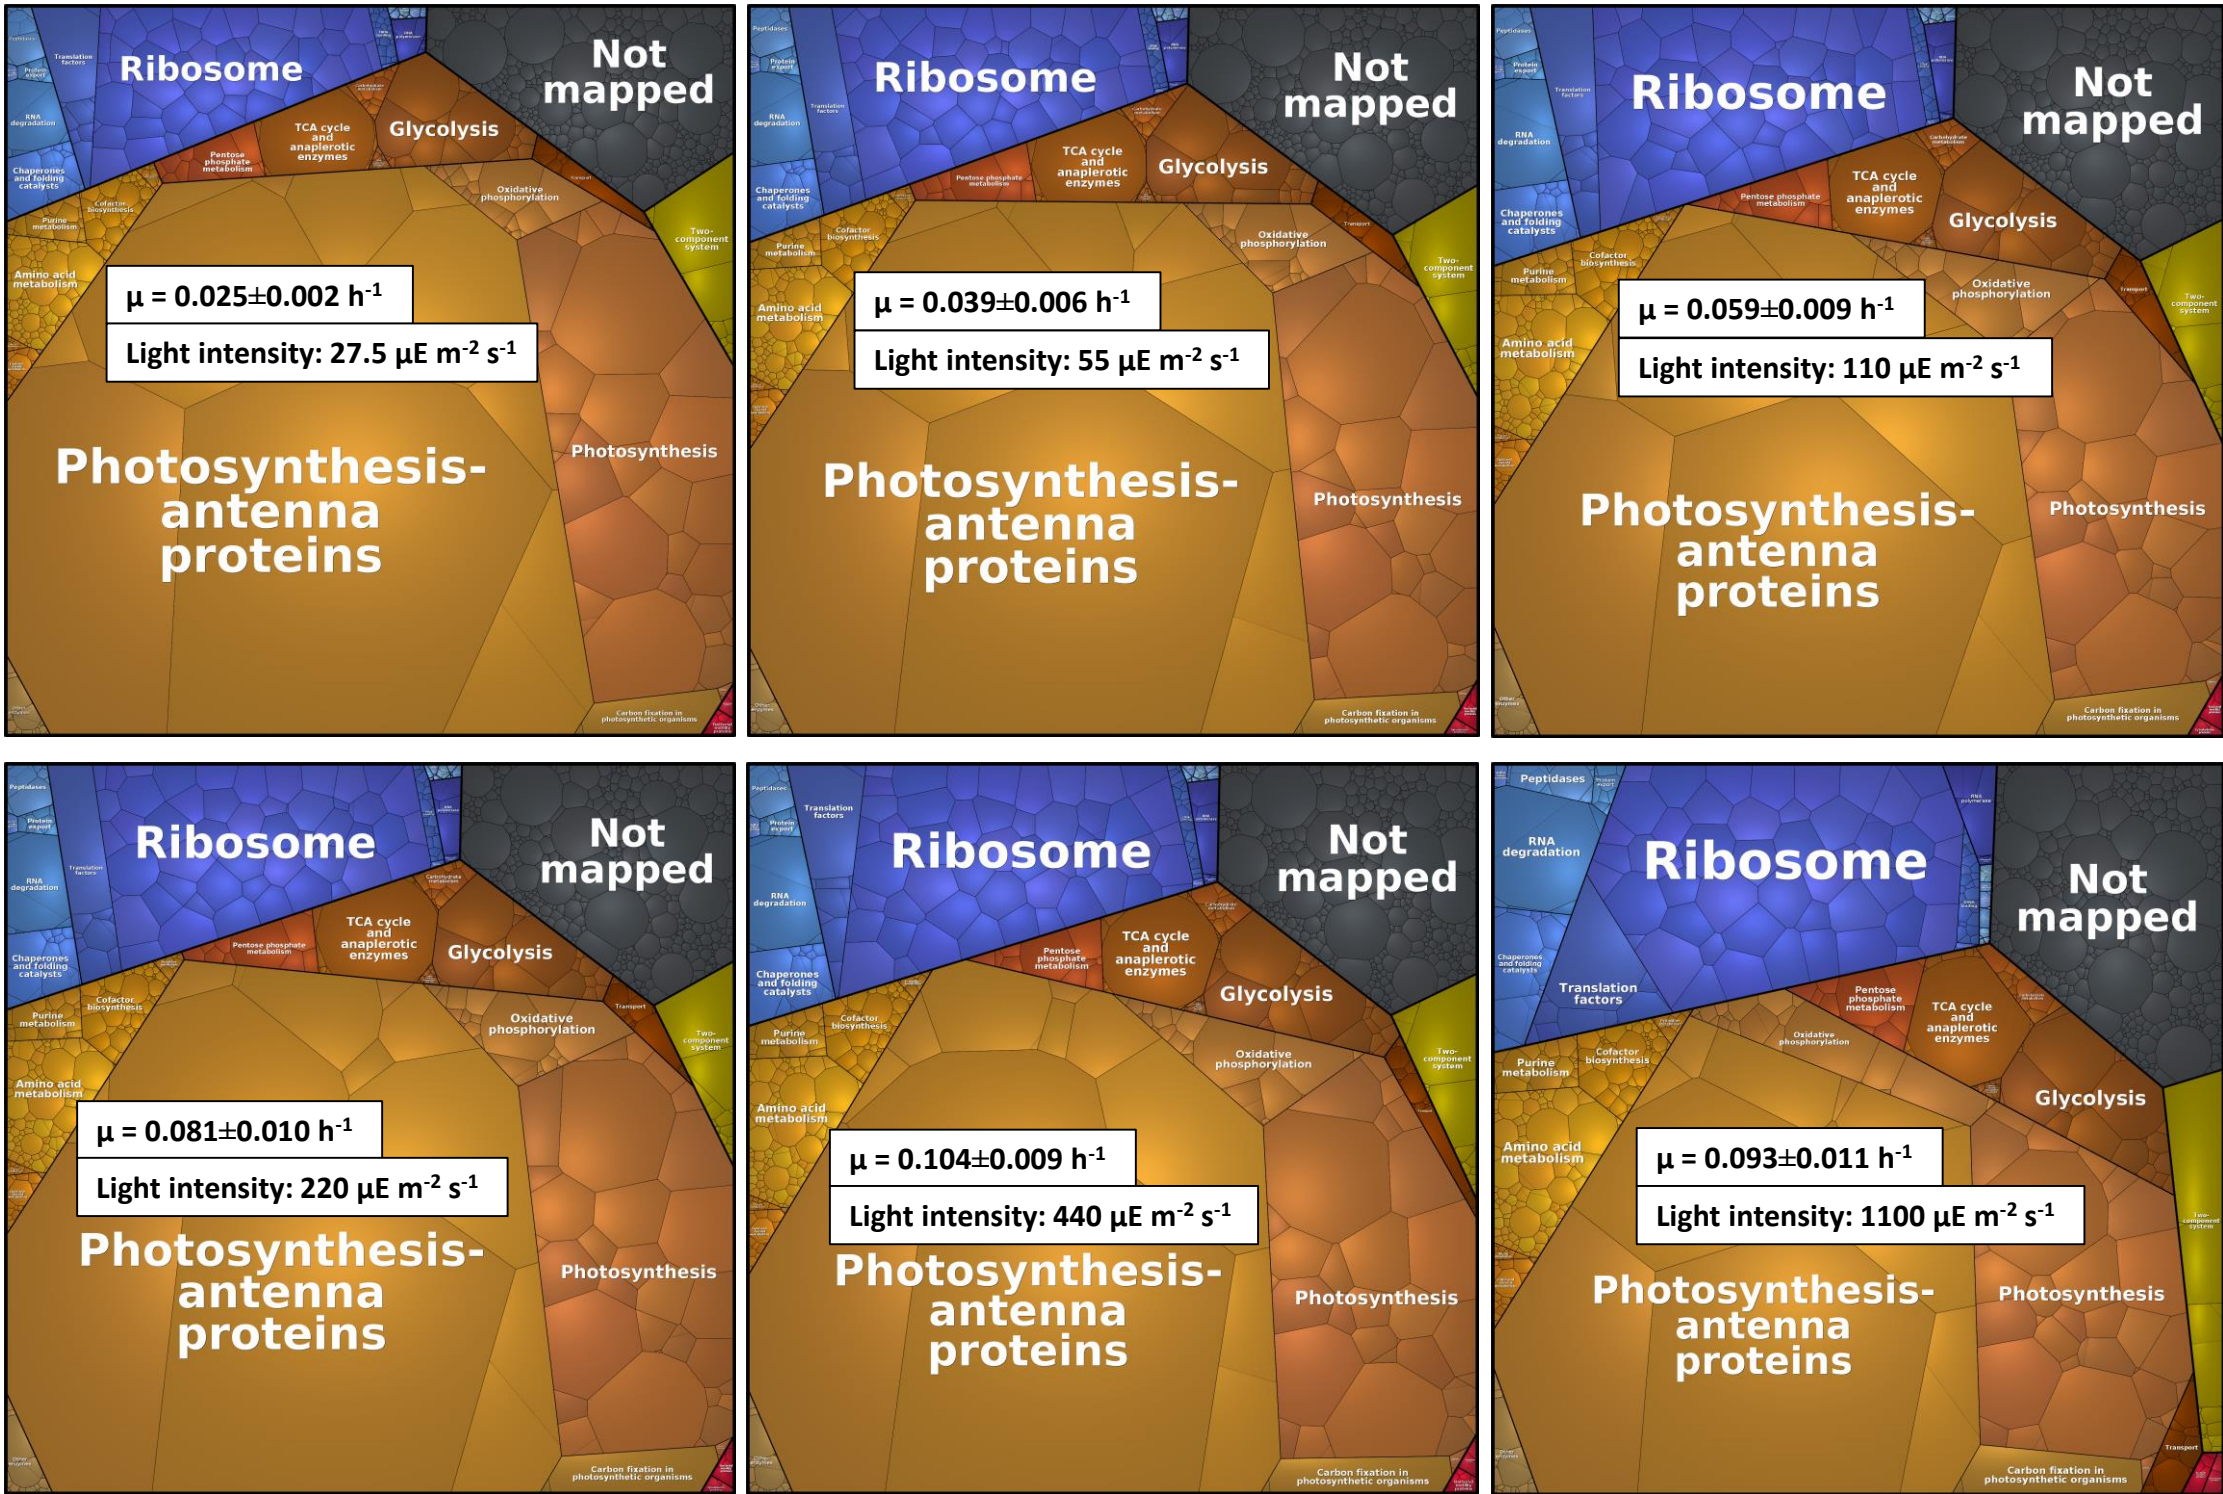

Proteomaps level 4: individual proteins

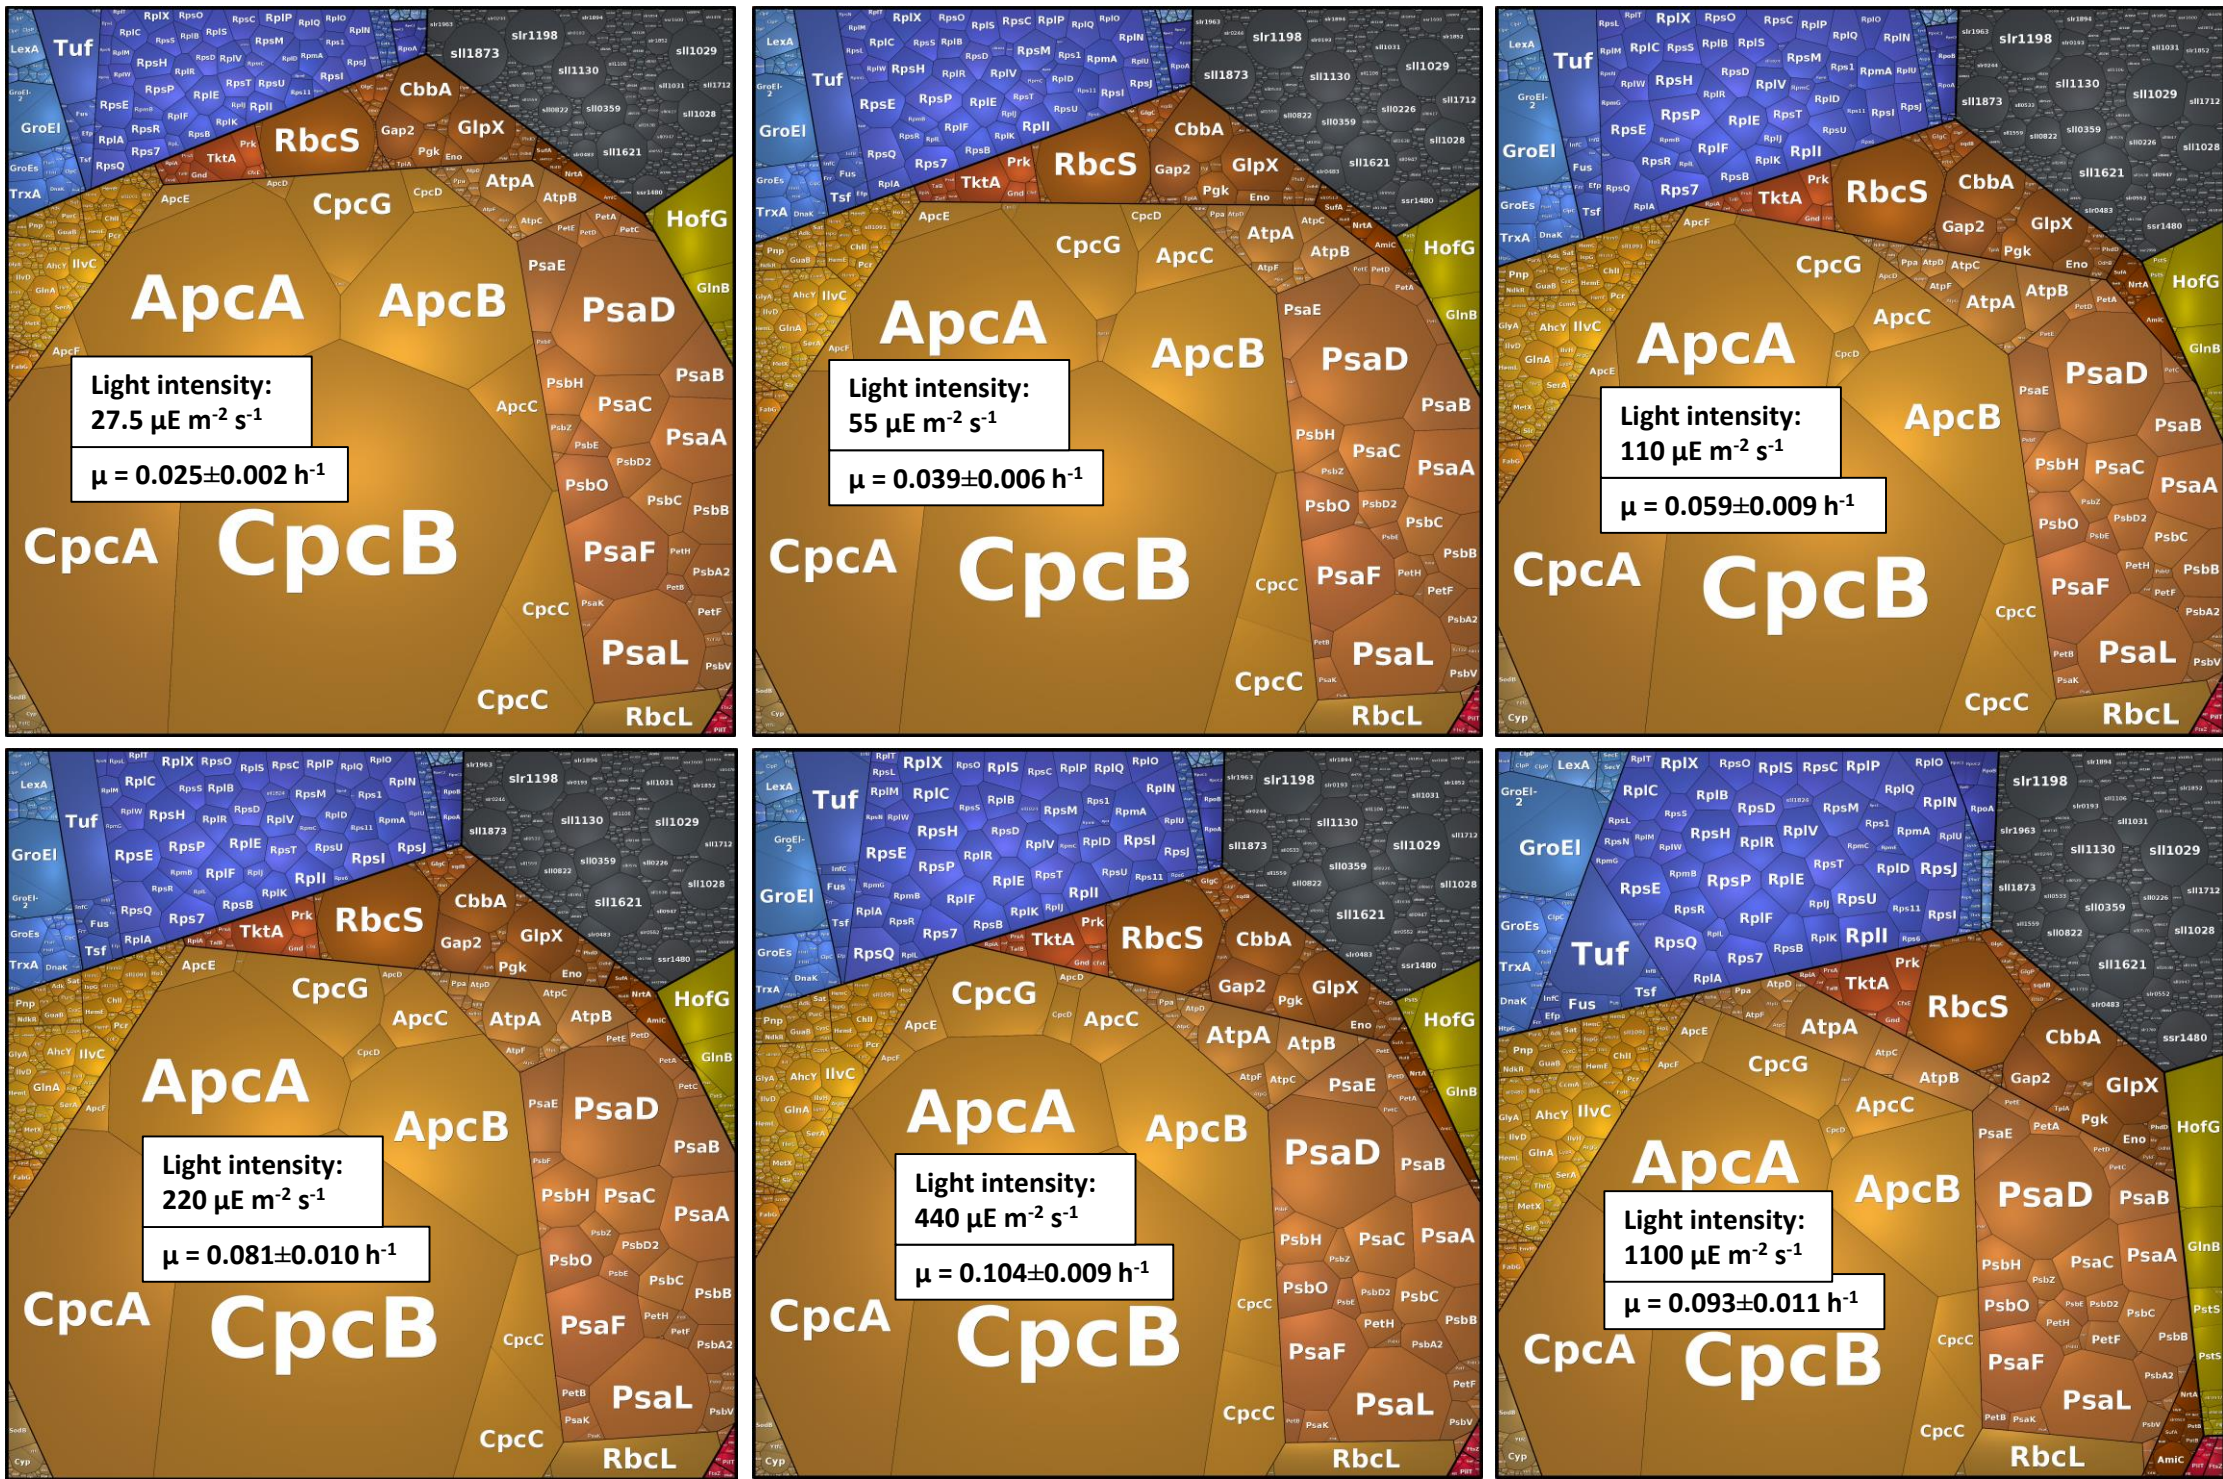

Supplement: supp [file elife-42508-supp-v1.zip]
