# Supplementary material for: Quantitative insights into the cyanobacterial cell economy
Source: eLife journal article supplement (doi:10.7554/elife.42508), 2019-02-04

## Cell morphology

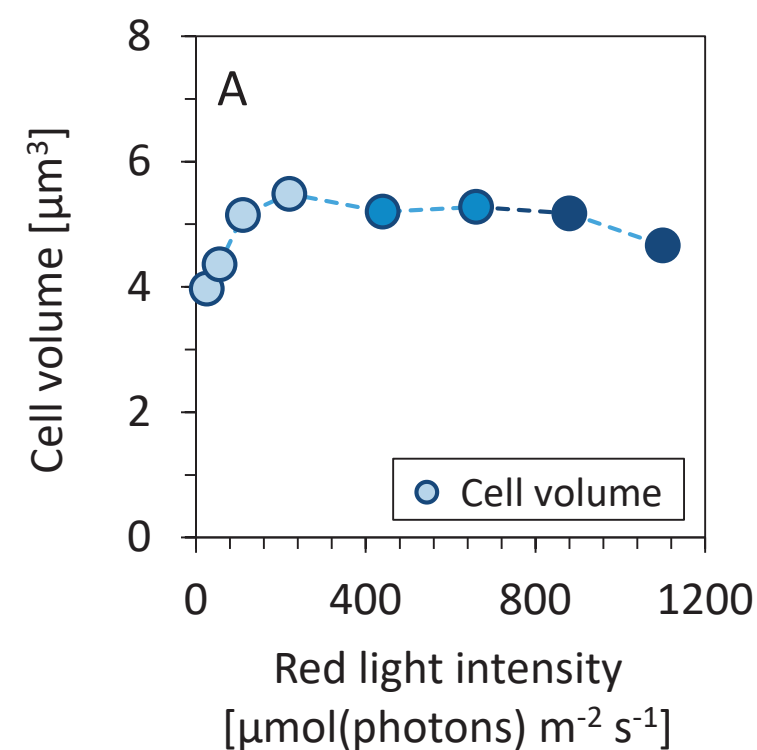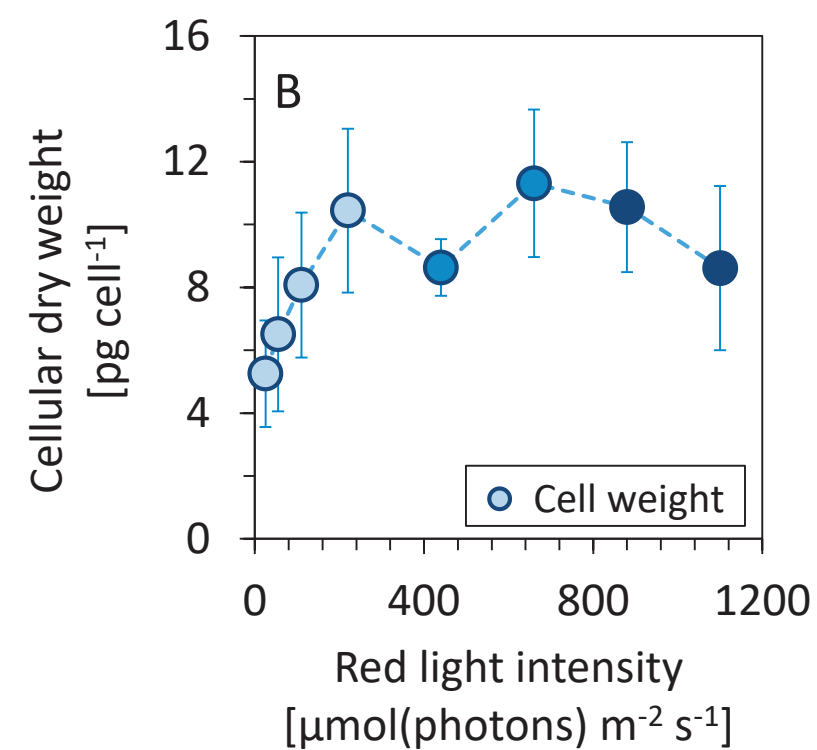

## Cell composition

Normalization per cellular dry weight

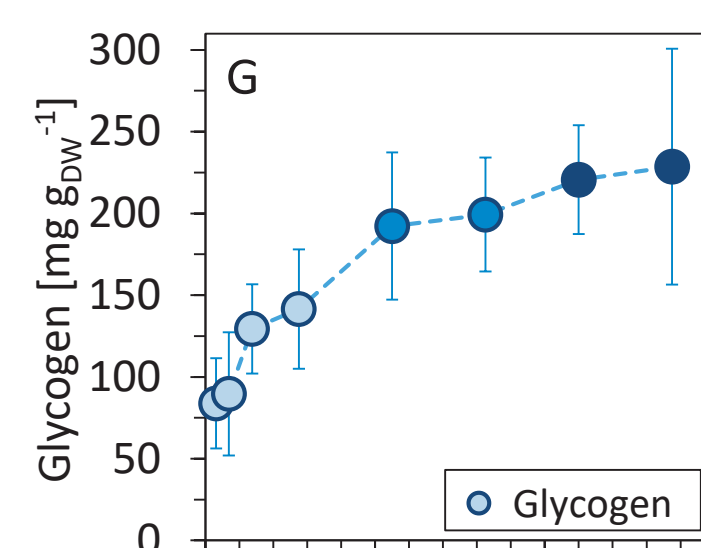

Normalization per cell

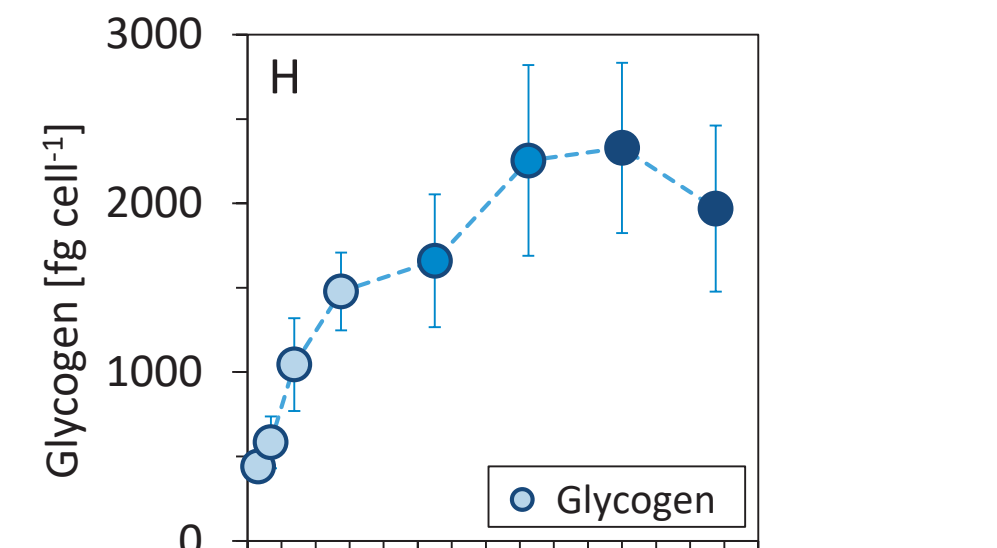

## Photosynthesis, respiration

Normalization per cellular dry weight

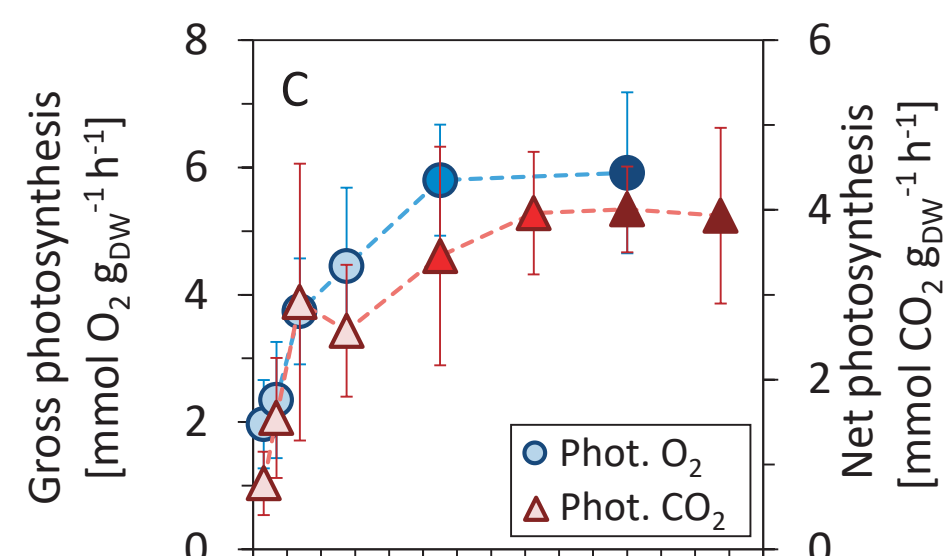

Normalization per cell

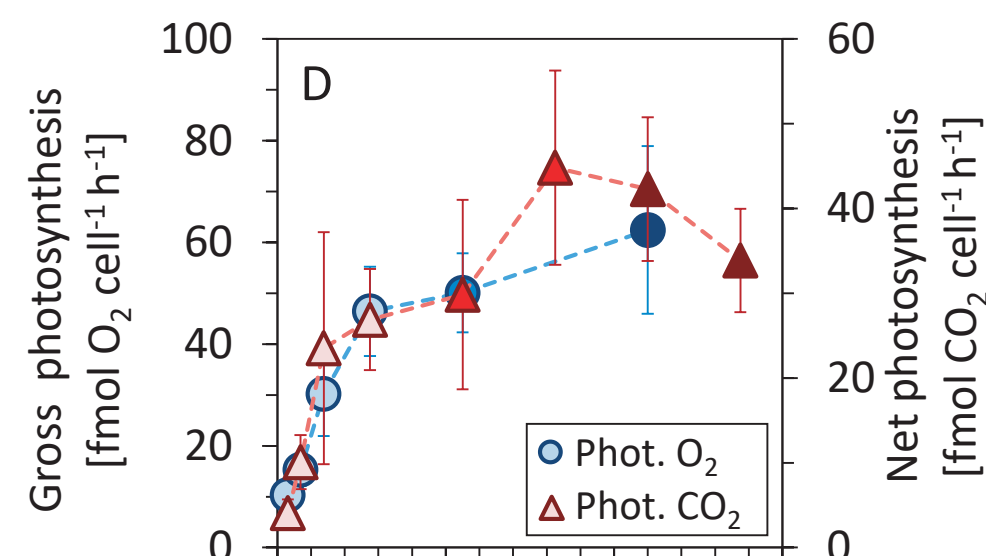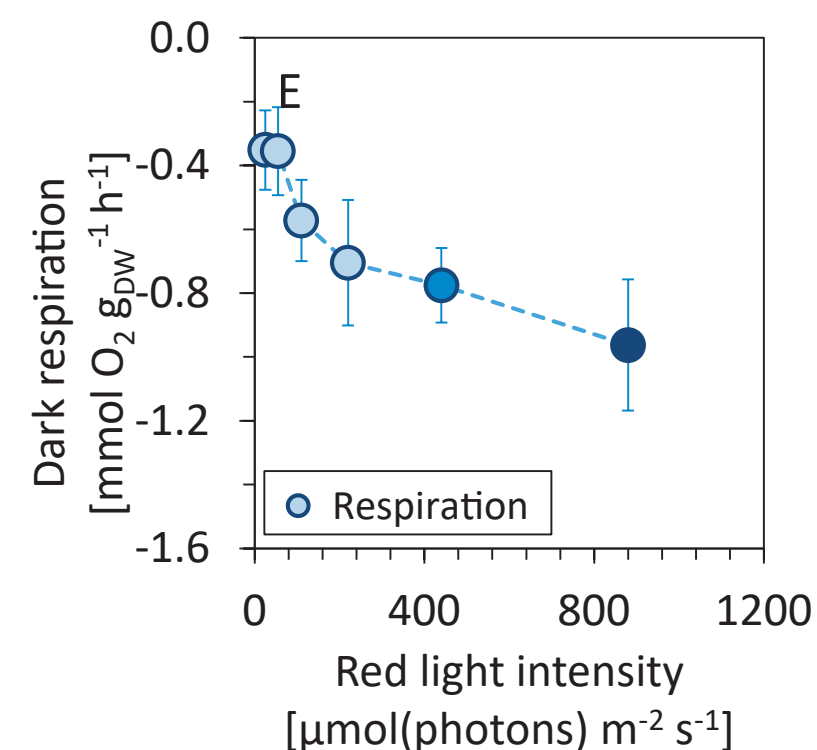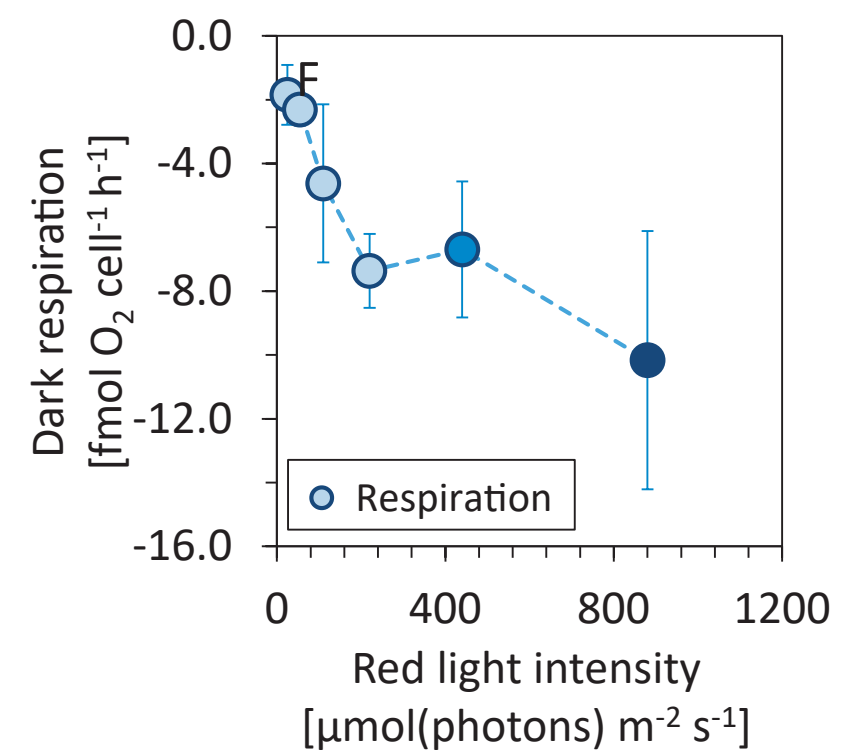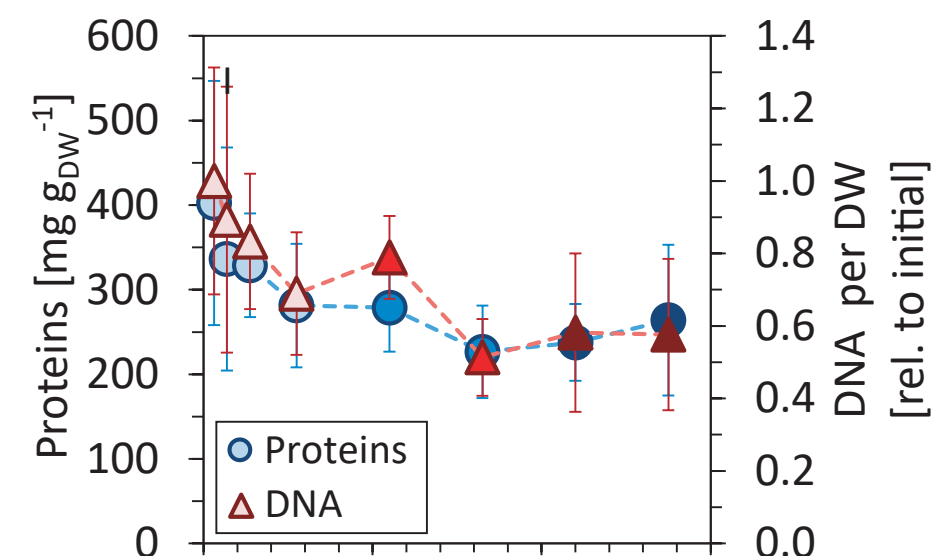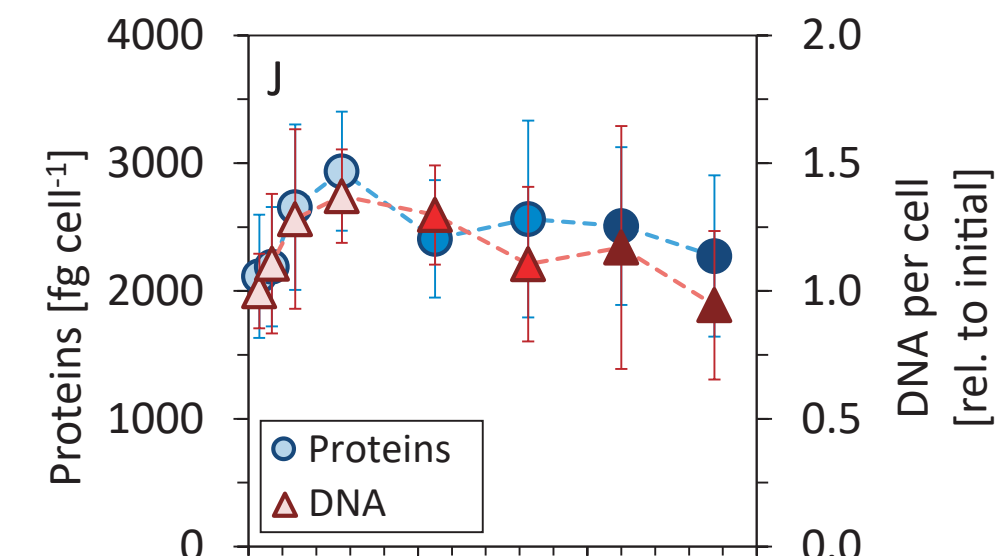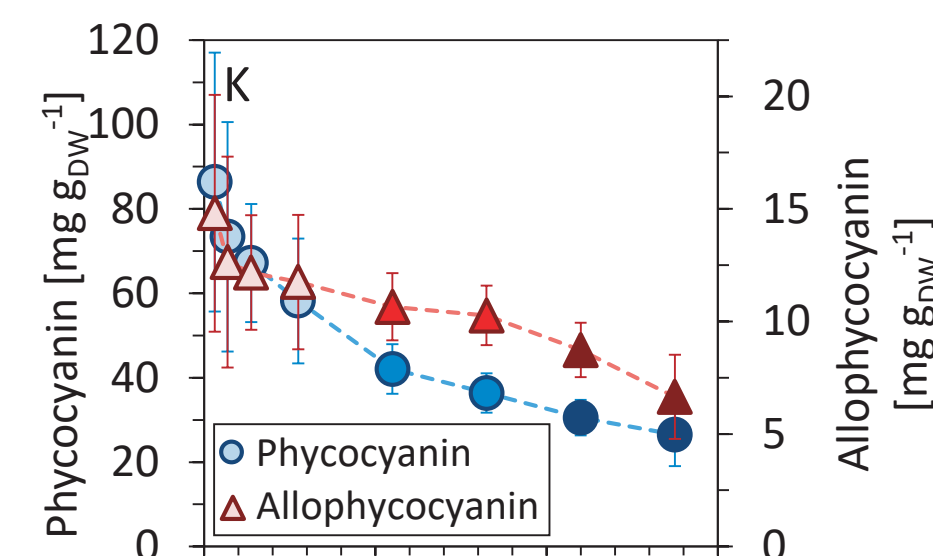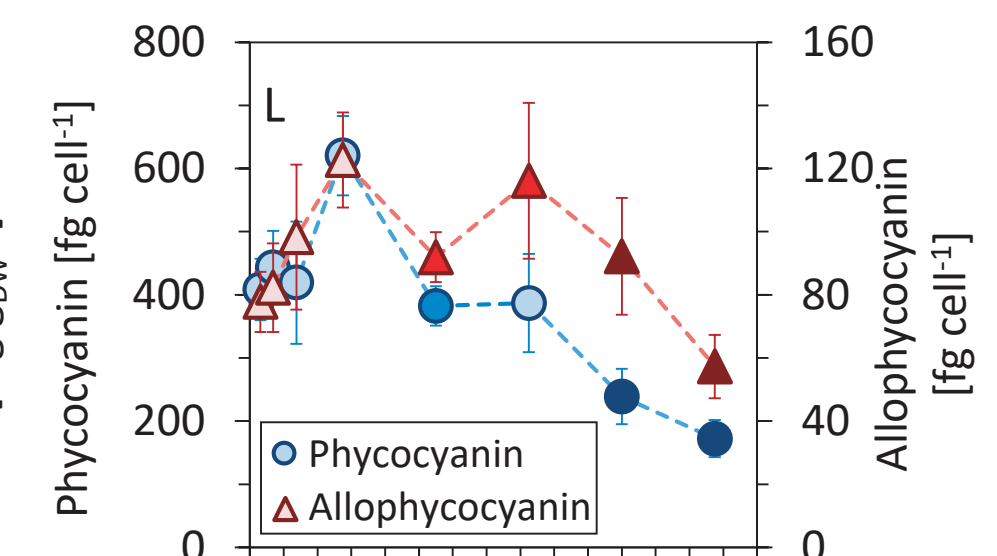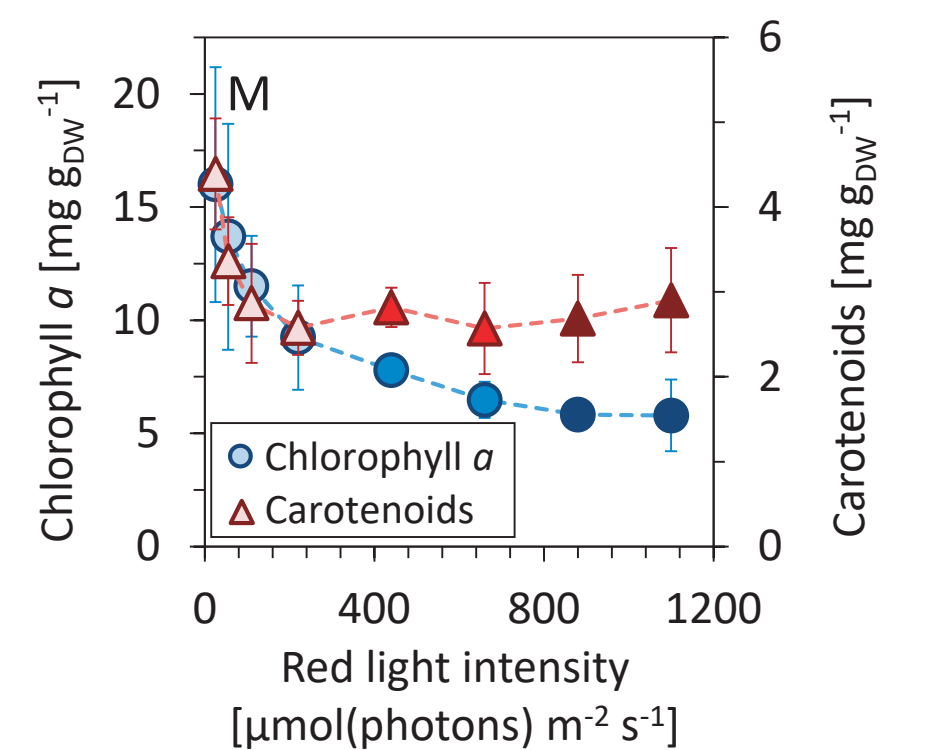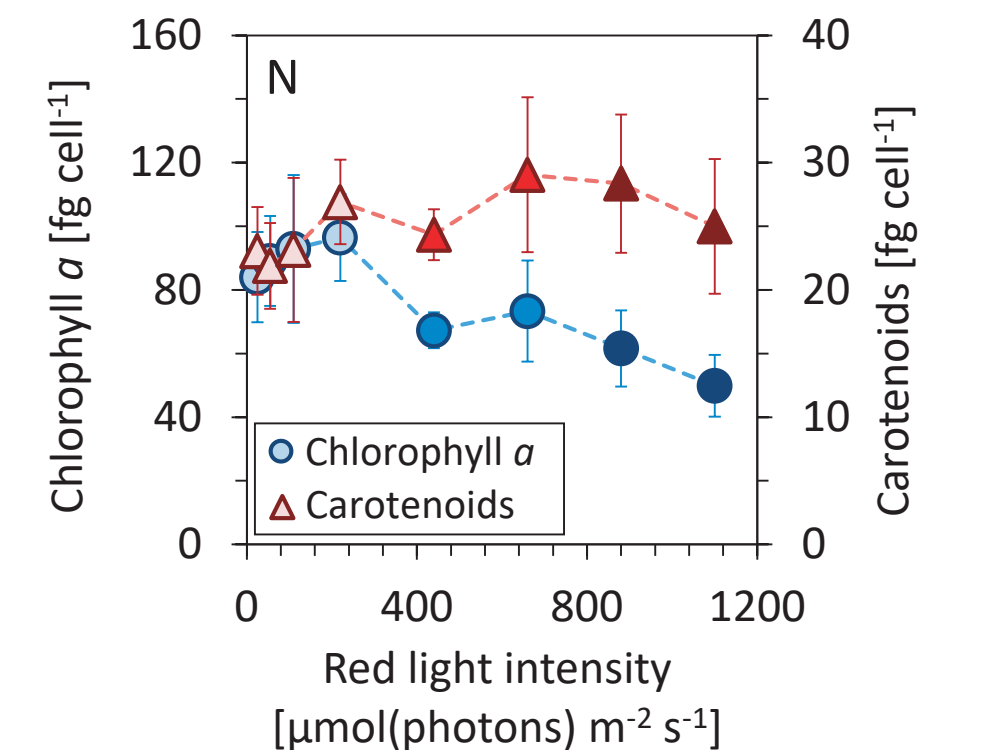

Supplement: supp [file elife-42508-supp-v1.zip]
